# Supplementary material for: Yak milk protects against alcohol-induced liver injury in rats
Source: Royal Society of Chemistry journal article supplement (doi:10.1039/d3fo03675h), 2023-01-01
Supplement: d3fo03675h1.zip [file d3fo03675h1.zip]

## Sheet: Sheet1
Index	Formula	Compounds	Class I	Class II	CAS	AL_1	AL_2	AL_3	AL_4	AL_5	AL_6	YM_1	YM_2	YM_3	YM_4	YM_5	YM_6	VIP	P-value	Fold_Change	Log2FC	Type
MW0160227	C3H7NO4S	(2R)-2-amino-3-hydrosulfonylpropanoic acid	Others	Others	-	9	9	9	9	9	9	685555	1.206e+06	2.33253e+06	178312	451779	1.28302e+06	3.12401	0.0226693	113652	16.7943	up
MW0053997	C15H22O3	Hydroxyvalerenic acid	Organic acid And Its derivatives	Organic acid And Its derivatives	1619-16-5	9	9	9	9	9	9	407303	875968	731262	288104	249105	607379	3.13913	0.00374094	58502.2	15.8362	up
MW0140271	C9H10O2	(2E,4E,6E)-4-Methylocta-2,4,6-trienedial	Aldehyde,Ketones,Esters	Aldehydes	-	9	9	9	9	9	9	84052.5	183856	357429	103238	134854	157801	3.13358	0.00824232	18911.7	14.207	up
MEDN1814	C15H12O4	Dihydrodaidzein	Benzene and substituted derivatives	Benzene and substituted derivatives	17238-05-0	9	9	9	9	9	9	81757.9	21141.7	24062.3	54961.2	173583	52985.8	3.13628	0.0314917	7564.67	12.8851	up
MEDN0824	C24H38O5	7-ketodeoxycholic acid	Hormones and hormone related compounds	Hormones and hormone related compounds	911-40-0	114291	318951	95330	263987	160204	158488	3.45363e+07	94533.1	1.43059e+07	145203	191302	123951	1.16779	0.220311	44.452	5.47417	up
MEDN0280	C2H7NO3S	2-Aminoethanesulfonic Acid	Organic acid And Its derivatives	Sulfonic acids	107-35-7	1.36675e+06	1.71944e+06	867447	1.14543e+06	848985	1.60391e+06	7.83352e+07	1.46615e+06	1.2334e+07	772726	1.60545e+06	2.53184e+06	1.43398	0.288274	12.8504	3.68374	up
MEDN1551	C5H6N2O2	Imidazoleacetic acid	Heterocyclic compounds	Indole and Its derivatives	645-65-8	68666.6	109745	46760.1	65594.9	62118.9	86935.6	3.77197e+06	89462.8	617731	44704.7	98748.7	115434	1.42024	0.28806	10.7727	3.4293	up
MEDP1001	C6H10O2	Delta-Hexalactone	Aldehyde,Ketones,Esters	Esters	823-22-3	9.38788e+06	8.96385e+06	9.58403e+06	9.12412e+06	9.04961e+06	1.01788e+07	1.082e+07	1.11823e+07	1.16944e+07	1.15352e+07	1.07464e+07	1.17566e+07	2.86505	2.34087e-05	1.20336	0.267067	insig
MW0062208	C39H62O12	Prosapogenin A	\	Steroidal saponins	19057-67-1	7.3135e+06	1.7194e+06	4.28744e+06	5.88666e+06	7.23341e+06	6.9047e+06	1.62228e+07	1.28908e+07	1.29142e+07	1.44888e+07	3.2539e+07	1.98092e+07	2.67047	0.00801788	3.26479	1.70699	up
MEDP2266	C6H15O15P3	Inositol 1,3,4-trisphosphate	Organic acid And Its derivatives	Phosphoric acids	98102-63-7	1.6813e+06	1.73315e+06	1.60812e+06	1.68453e+06	1.69529e+06	1.66146e+06	1.77614e+06	1.86551e+06	1.95964e+06	1.93675e+06	1.95103e+06	1.76779e+06	2.64598	0.00140982	1.11854	0.161621	insig
MEDP2326	C5H9N3O2	Cyclocreatine	Nucleotide And Its metabolites	Nucleotide And Its metabolites	35404-50-3	1.00117e+06	938066	885118	885346	816618	790398	1.04939e+06	1.2446e+06	1.07233e+06	1.22347e+06	1.26235e+06	1.47525e+06	2.63891	0.0017751	1.37818	0.462762	insig
MEDP2353	C11H20N4O6	Glu-Cit	Amino acid and Its metabolites	Small Peptide	-	194882	202158	243846	366473	281685	213698	602247	851981	301295	404366	913920	666356	2.62306	0.0115233	2.48889	1.3155	up
MEDN1159	C15H28O2	FFA(15:1)	FA	FFA	84743-29-3	676597	2.39204e+06	1.49631e+06	1.43231e+06	1.05958e+06	708295	372621	437300	472398	388888	599669	484679	2.61616	0.023677	0.354863	-1.49467	down
MW0156191	C21H39O13P	PtdIns-(1,2-dihexanoyl)	Organic acid And Its derivatives	Sulfonic acids	-	141223	190580	104736	162273	212486	96134	281299	226240	324155	247587	362513	271245	2.61379	0.000719171	1.88779	0.916697	insig
MW0010939	C27H46O3	(20R,22R)-20,22-Dihydroxycholesterol	Hormones and hormone related compounds	Hormones and hormone related compounds	-	2.00966e+06	1.63976e+06	2.474e+06	1.9748e+06	7.81974e+06	2.3867e+06	1.20997e+07	1.76618e+07	5.50545e+06	4.36865e+06	7.43241e+06	8.4434e+06	2.57897	0.026294	3.03263	1.60057	up
MW0144826	C18H18N2O6	Ala-HoPhe-OH	Amino acid and Its metabolites	Amino acid derivatives	-	378027	492956	423040	662297	504543	208199	727198	1.21394e+06	754682	959077	2.26236e+06	1.58169e+06	2.54283	0.0192836	2.80958	1.49036	up
MW0010583	C18H18O4	Enterolactone	Aldehyde,Ketones,Esters	Ketones	78473-71-9	223570	281418	258584	450381	451586	161364	421696	701139	485024	455514	709754	693232	2.44728	0.00444955	1.8974	0.92402	insig
MW0108636	C8H15N3O4	N-Acetyl-L-citrulline	Amino acid and Its metabolites	Amino acid derivatives	33965-42-3	35713.5	48192.5	44489.8	64037.4	39376.9	38817.2	23700.2	40311.5	28208.3	30143.7	29375.3	26481.4	2.41786	0.0128543	0.658545	-0.602646	insig
MEDP2132	C5H9NO2	1-Aminocyclobutanecarboxylic acid	Amino acid and Its metabolites	Amino acid derivatives	22264-50-2	3.09051e+07	6.18612e+07	3.86696e+07	5.86218e+07	4.84768e+07	4.49178e+07	106253348	8.83095e+07	6.51274e+07	5.51927e+07	1.0257e+08	6.68376e+07	2.3759	0.0102383	1.70854	0.772766	insig
MEDP0022	C5H9NO2	L-Proline	Amino acid and Its metabolites	Amino acids	147-85-3	3.09051e+07	6.18612e+07	3.86696e+07	5.86218e+07	4.84768e+07	4.49178e+07	106253348	8.83095e+07	6.51274e+07	5.51927e+07	1.0257e+08	6.68376e+07	2.3759	0.0102383	1.70854	0.772766	insig
MEDN1722	C8H6O4	Piperic acid	Organic acid And Its derivatives	Organic acid And Its derivatives	94-53-1	809883	740288	660040	825295	701462	785908	855003	892185	817153	993618	1.14078e+06	1.16127e+06	2.35384	0.0119596	1.29564	0.373661	insig
MEDN0611	C19H28O3	6β-hydroxytestosterone	Hormones and hormone related compounds	Hormones and hormone related compounds	62-99-7	9865.51	7142.61	7961.57	11302.3	8776.22	10207	12586.1	12153.3	12671.6	10658.2	14028.4	10904	2.34751	0.00470472	1.32117	0.401814	insig
MW0150925	C25H32N6O9	His-Glu-Phe-Glu	Amino acid and Its metabolites	Small Peptide	-	283972	185079	355435	277364	361233	274858	513924	815287	274775	498801	413846	720641	2.34216	0.0259815	1.86271	0.897401	insig
MEDP0148	C6H6N4O2	1-Methylxanthine	Nucleotide And Its metabolites	Nucleotide And Its metabolites	6136-37-4	460887	143967	134169	138961	188223	774407	968481	1.04923e+06	1.62588e+06	286882	1.07138e+06	3.11579e+06	2.29036	0.0442329	4.41029	2.14087	up
MW0151054	C28H32N6O8	His-Phe-Tyr-Asp	Amino acid and Its metabolites	Small Peptide	-	706351	723744	331595	607021	759485	580490	772472	1.01954e+06	778274	1.00066e+06	966459	1.08472e+06	2.28546	0.00352973	1.51593	0.600206	insig
MEDP0170	C5H4N4O	Hypoxanthine	Nucleotide And Its metabolites	Nucleotide And Its metabolites	68-94-0	2.73486e+06	2.0752e+06	2.28711e+06	2.9992e+06	2.33352e+06	3.0698e+06	4.51448e+06	5.6116e+06	2.35919e+06	4.10545e+06	4.10205e+06	3.56151e+06	2.28223	0.0190189	1.56482	0.646001	insig
MEDP0823	C9H10O3	(R)-2-Hydroxy-3-phenylpropionic acid	Organic acid And Its derivatives	Organic acid And Its derivatives	7326-19-4	6.67533e+06	6.44393e+06	4.82101e+06	6.66254e+06	5.38724e+06	5.84046e+06	7.08484e+06	6.96528e+06	6.52086e+06	8.10503e+06	9.30444e+06	8.41307e+06	2.24774	0.00879955	1.2948	0.372734	insig
MEDN0279	C2H7NO2S	2-Aminoethanesulfinic Acid	Organic acid And Its derivatives	Sulfonic acids	300-84-5	5402.69	17083.6	3209.6	5061.25	11645.2	11318.5	366720	13634.4	21006.1	5532.12	2363.64	31471.1	1.13998	0.322911	8.20404	3.03633	up
MW0138093	C15H14O3	3-(4-hydroxyphenyl)-3,4-dihydro-2H-1-benzopyran-7-ol	Benzene and substituted derivatives	Benzene and substituted derivatives	94105-90-5	69883.4	44725.4	91148.2	135929	61771.9	99212.2	147837	224186	159744	150300	96840.7	410283	2.23488	0.0535383	2.36575	1.2423	up
MW0157634	C21H39N5O8	Thr-Glu-Leu-Lys	Amino acid and Its metabolites	Small Peptide	-	2.43174e+06	648658	834616	1.30865e+06	3.15963e+06	396800	4.2302e+06	1.97065e+06	2.31681e+06	3.94515e+06	7.34323e+06	2.64511e+06	2.22852	0.0397799	2.55705	1.35448	up
MEDN1484	C8H10N2S	Ethionamide	Heterocyclic compounds	Pteridines and derivatives	536-33-4	1.14006e+07	9.5631e+06	9.48108e+06	1.07367e+07	9.64157e+06	1.03106e+07	1.25443e+07	1.10146e+07	1.00597e+07	1.41149e+07	1.48748e+07	1.49309e+07	2.22677	0.0210627	1.26836	0.342962	insig
MEDP1788	C11H18N3O15P3	N4-Acetylcytidine-triphosphate	Nucleotide And Its metabolites	Nucleotide And Its metabolites	-	1.63756e+06	1.58138e+06	1.47344e+06	1.50237e+06	1.61214e+06	1.75161e+06	1.707e+06	1.67629e+06	1.69902e+06	1.76735e+06	1.75081e+06	1.86572e+06	2.22395	0.0139729	1.09496	0.13088	insig
MW0147042	C28H46O	Campest-4-en-3-one	Aldehyde,Ketones,Esters	Ketones	-	1.75155e+06	3.71637e+06	2.04695e+06	3.61595e+06	1.94635e+06	1.96529e+06	1.48253e+06	2.33313e+06	1.41969e+06	849087	1.12676e+06	1.20643e+06	2.22226	0.0316141	0.559591	-0.837554	insig
MEDP1100	C5H7N3	2-Aminomethylpyrimidine	Nucleotide And Its metabolites	Nucleotide And Its metabolites	372118-67-7	288868	463846	242303	287030	358844	329954	369238	445092	784670	444363	586855	882897	2.22032	0.0274241	1.78254	0.833937	insig
MEDN0678	C9H10O3	Ethylsalicylate	Organic acid And Its derivatives	Organic acid And Its derivatives	118-61-6	1.21884e+07	9.6997e+06	9.65399e+06	1.12848e+07	9.59354e+06	1.06105e+07	1.24922e+07	1.13445e+07	1.10121e+07	1.45326e+07	1.55046e+07	1.54162e+07	2.21998	0.0161648	1.27401	0.349376	insig
MEDN1949	C9H17N3O4	Asn-Val	Amino acid and Its metabolites	Small Peptide	145314-87-0	99875.9	90329.8	31599.8	72073.1	87054.3	140729	214941	256691	187168	113334	107399	271447	2.20909	0.0124436	2.20637	1.14167	up
MEDN2117	C9H16N2O5	Hyp-Thr	Amino acid and Its metabolites	Small Peptide	-	375212	494318	474454	478300	423855	504302	530106	527815	602173	618729	763856	500794	2.20603	0.0189349	1.28833	0.365501	insig
MEDP0601	C7H19N3	Spermidine	Alcohol and amines	Polyamines	124-20-9	1.37805e+06	1.94553e+06	1.14229e+06	1.87543e+06	3.38539e+06	2.48617e+06	3.93828e+06	3.42632e+06	1.81171e+06	3.77116e+06	3.82659e+06	3.15706e+06	2.20355	0.0196089	1.63198	0.706623	insig
MW0158939	C21H39N7O7	Val-Asp-Ile-Arg	Amino acid and Its metabolites	Small Peptide	-	8.13792e+06	1.53651e+06	1.23465e+06	2.08708e+06	7.24581e+06	1.5187e+06	9.71949e+06	5.57449e+06	8.25086e+06	5.32997e+06	1.19461e+07	6.7518e+06	2.20045	0.028338	2.18618	1.12841	up
MW0013918	C27H46O5	3alpha,7alpha,12alpha,24(S)-tetrahydroxy-5beta-cholestan-27-al	Aldehyde,Ketones,Esters	Aldehydes	-	3.38301e+06	818741	1.53008e+06	730588	3.86105e+06	540645	5.88121e+06	2.43666e+06	2.86503e+06	4.74194e+06	9.60348e+06	2.90517e+06	2.19987	0.0502234	2.61719	1.38802	up
MEDP2333	C11H21N3O5	γ-Glu-Lys	Amino acid and Its metabolites	Small Peptide	-	1.31496e+06	333613	597217	824997	716932	455225	1.30796e+06	890023	1.57987e+06	1.02078e+06	1.21051e+06	1.78646e+06	2.17814	0.0133215	1.83731	0.877594	insig
MW0168574	C9H8N2O	3-Methyl-2-quinoxalinone	Heterocyclic compounds	Heterocyclic compounds	14003-34-0	56195.4	111089	84482.9	87623.5	148332	103514	192699	256695	176709	120224	92759.3	286439	2.17009	0.0328862	1.90368	0.92879	insig
MEDP0450	C7H7NO2	P-Aminobenzoate	Benzene and substituted derivatives	Phenolic acids	150-13-0	413201	775645	485260	644883	846915	555093	1.82879e+06	665821	814873	1.04897e+06	2.57872e+06	901362	2.15695	0.0739687	2.10657	1.07489	up
MEDP2608	C15H18N4O4	Tyr-His	Amino acid and Its metabolites	Small Peptide	3788-44-1	109767	109685	77164.6	206960	230431	138959	224552	321641	385365	128541	243705	485828	2.14038	0.0317082	2.05006	1.03567	up
MEDP0325	C4H4O4	Maleic Acid	Organic acid And Its derivatives	Organic acid And Its derivatives	110-16-7	5.04648e+06	1.01167e+07	5.31012e+06	9.86864e+06	8.26241e+06	7.04021e+06	1.76738e+07	1.38309e+07	1.11587e+07	7.53767e+06	1.92981e+07	9.87509e+06	2.13627	0.0294018	1.73896	0.798228	insig
MEDP0064	C5H9NO3S	N-Acetylcysteine	Amino acid and Its metabolites	Amino acid derivatives	616-91-1	16770.7	25108	52262.7	28216.3	45835.4	42748.1	105113	51011	45184.2	61933.3	42991.1	56328.4	2.13046	0.0490252	1.71878	0.781381	insig
MEDP1459	C20H28O3	Epoxy-eicosapentaenoic acid	FA	FFA	-	1939299	342529	1.01205e+06	1.57323e+06	3.66438e+06	355205	1.87982e+06	6.22416e+06	4.47981e+06	3.49242e+06	1.7624e+06	4.34556e+06	2.11197	0.0296827	2.49633	1.31981	up
MW0130411	C15H14O4	2',4',6'-Trihydroxydihydrochalcone	Aldehyde,Ketones,Esters	Ketones	1088-08-0	576671	346701	513972	911306	471051	594385	1.15884e+06	974321	860969	973809	595059	2.55315e+06	2.10812	0.0827782	2.08435	1.0596	up
MEDP2568	C9H15N3O5	Asn-Hyp	Amino acid and Its metabolites	Small Peptide	-	98546.4	73699.5	80284.8	84462.6	84880.7	79865.9	29960.9	86539.7	50874.2	54081.3	36094.4	73628.9	2.10449	0.0219494	0.660062	-0.599327	insig
MEDP0017	C6H9N3O2	L-Histidine	Amino acid and Its metabolites	Amino acids	71-00-1	4.51466e+06	5.38411e+06	2.50547e+06	3.83353e+06	4.49317e+06	4.33504e+06	7.35924e+06	4.39941e+06	9.90507e+06	4.61102e+06	7.30778e+06	1.0002e+07	2.09668	0.0254207	1.73879	0.798085	insig
MEDP1961	C15H21N5O8	Ribosyladenosine	Nucleotide And Its metabolites	Nucleotide And Its metabolites	-	172974	236606	44464.9	166750	96052.7	43300.6	165481	359516	154245	305388	732069	491099	2.08937	0.0420033	2.90443	1.53825	up
MEDP1203	C7H9NO3	(1R,6S)-6-amino-5-oxocyclohexyl-2-ene-1-carboxylic-acid-ester	Aldehyde,Ketones,Esters	Esters	-	4.51253e+06	4.76114e+06	2.31198e+06	3.74868e+06	4.16069e+06	3.96759e+06	7.38353e+06	3.75296e+06	1.04539e+07	4.41696e+06	8.40144e+06	9.33701e+06	2.08114	0.0261939	1.86449	0.89878	insig
MEDN0622	C10H14N2O4	Porphobilinogen	Organic acid And Its derivatives	Organic acid And Its derivatives	487-90-1	9.67496e+06	8.8743e+06	8.0525e+06	9.4072e+06	7.15342e+06	1.01221e+07	1.11098e+07	9.49763e+06	9.2858e+06	1.18281e+07	1.28073e+07	12395695	2.08106	0.0142102	1.25598	0.328813	insig
MEDN1908	C9H8O6	5-Carboxyvanillic Acid	Organic acid And Its derivatives	Organic acid And Its derivatives	2134-91-0	262789	260048	290358	247310	310905	276194	287105	293359	303935	295893	326715	375923	2.07358	0.0424661	1.14283	0.192609	insig
MW0158998	C19H35N5O8	Val-Glu-Ser-Lys	Amino acid and Its metabolites	Small Peptide	-	576745	553477	963339	1.3596e+06	925519	390486	1.78426e+06	1.08463e+06	1.26263e+06	1.40408e+06	6.52206e+06	1.18114e+06	2.0603	0.166875	2.77592	1.47297	up
MEDN1933	C6H10N2O5	Asp-Gly	Amino acid and Its metabolites	Small Peptide	3790-51-0	268071	101141	166062	277176	170257	133445	213124	264195	279864	367952	295651	643552	2.05851	0.0576042	1.84951	0.887145	insig
MEDN1491	C15H14O3	Equol	Hormones and hormone related compounds	Hormones and hormone related compounds	531-95-3	59026.3	41941.4	113006	151207	69375	106359	139025	250017	169801	154015	89861.1	430317	2.05746	0.069397	2.27954	1.18874	up
MEDN0198	C6H8O7	Citric Acid	Organic acid And Its derivatives	Organic acid And Its derivatives	77-92-9	952345	215625	460376	345740	597850	369753	234715	321523	159823	291158	178300	201763	2.03485	0.0581718	0.471594	-1.08438	down
MW0054972	C21H36O4	MG(0:0/18:3(9Z,12Z,15Z)/0:0)	GL	MG	-	1.17152e+06	581994	487779	1.52127e+06	2.59179e+06	546296	1.17587e+06	4.19105e+06	3.1546e+06	2.29554e+06	1.19722e+06	2.92885e+06	2.02865	0.048328	2.16547	1.11468	up
MW0052379	C15H22O5	Dihydrophaseic acid	Organic acid And Its derivatives	Organic acid And Its derivatives	-	2.00626e+06	1.60211e+06	1.55822e+06	1.77366e+06	1.52144e+06	1.30224e+06	2.02866e+06	1.86445e+06	1.6178e+06	2.267e+06	2.25229e+06	2.02911e+06	2.02822	0.0210897	1.23509	0.304614	insig
MEDP1162	C6H7N5O	1-Methylguanine	Nucleotide And Its metabolites	Nucleotide And Its metabolites	938-85-2	4.92513e+06	2.47754e+06	3.52879e+06	3.61469e+06	3.71027e+06	2.46964e+06	7.33375e+06	8.57969e+06	3.19691e+06	6.30056e+06	1.02282e+07	3.33475e+06	2.02571	0.0457104	1.88043	0.911061	insig
MEDP1073	C6H7N5O	6-O-methylguanine	Nucleotide And Its metabolites	Nucleotide And Its metabolites	20535-83-5	4.92513e+06	2.47754e+06	3.52879e+06	3.61469e+06	3.71027e+06	2.46964e+06	7.33375e+06	8.57969e+06	3.19691e+06	6.30056e+06	1.02282e+07	3.33475e+06	2.02571	0.0457104	1.88043	0.911061	insig
MEDP0271	C11H11NO2	3-Indolepropionic Acid	Heterocyclic compounds	Indole and Its derivatives	830-96-6	171215	292650	78121.1	67133.7	119964	98165.1	344275	179255	241136	169034	386959	1.15219e+06	2.01724	0.133825	2.98925	1.57978	up
MW0106957	C16H28N4O8	Glu-Glu-Lys	Amino acid and Its metabolites	Small Peptide	-	1.86075e+06	2.53271e+06	2.3178e+06	1.02231e+07	15337603	8.7057e+06	1.54107e+07	1.49405e+07	8.2481e+06	1.20403e+07	8.94213e+06	1.22945e+07	2.01262	0.0793931	1.75403	0.810676	insig
MW0143932	C27H46O3	7alpha,12alpha-Dihydroxy-5alpha-cholestan-3-one	Aldehyde,Ketones,Esters	Ketones	-	4.96313e+06	2.98413e+06	1.87559e+06	7.43605e+06	1.50464e+07	9.6286e+06	1.28871e+07	1.45436e+07	8.40067e+06	1.09665e+07	1.09241e+07	1.24375e+07	2.01034	0.0673285	1.6731	0.742522	insig
MEDL01837	C17H26O4	Nordihydrocapsiate	Phenolic acids	Phenolic acids	220012-53-3	758030	902355	878660	1.18954e+06	735638	629133	637625	882347	520322	547709	602961	547846	2.00945	0.0443052	0.734057	-0.446036	insig
MEDP0677	C4H11N	Butylamine	Alcohol and amines	Amines	109-73-9	1.03964e+06	1.60412e+06	807805	1.4317e+06	1.06108e+06	1.30053e+06	1.54939e+06	1.70412e+06	1.42813e+06	1.4322e+06	3.27885e+06	2.07968e+06	2.00804	0.0619133	1.58351	0.66313	insig
MEDP0015	C6H13N3O3	L-Citrulline	Amino acid and Its metabolites	Amino acids	372-75-8	4.60965e+07	6.58705e+07	2.66027e+07	4.28999e+07	4.05155e+07	5.74876e+07	8.21093e+07	9.12237e+07	3.99444e+07	5.9482e+07	1.28981e+08	8.4457e+07	1.99737	0.0386368	1.7397	0.798835	insig
MW0156984	C11H21N3O6	Ser-Val-Ser	Amino acid and Its metabolites	Small Peptide	-	335805	149711	237382	259989	323152	138237	495214	282372	369660	291175	306320	383412	1.97637	0.037057	1.47351	0.559255	insig
MEDN1706	C9H10O3	3-(2-Hydroxyphenyl)propanoic acid	Benzene and substituted derivatives	Phenolic acids	495-78-3	2.33963e+07	1.8974e+07	1.63494e+07	2.00194e+07	1.61984e+07	1.45966e+07	2.41166e+07	2.00689e+07	1.80069e+07	2.68535e+07	2.71222e+07	2.49452e+07	1.9678	0.0255479	1.28831	0.365475	insig
MEDN1017	C9H10O3	3-(4-Hydroxyphenyl)-Propionic Acid	Benzene and substituted derivatives	Phenolic acids	501-97-3	2.33963e+07	1.8974e+07	1.63494e+07	2.00194e+07	1.61984e+07	1.45966e+07	2.41166e+07	2.00689e+07	1.80069e+07	2.68535e+07	2.71222e+07	2.49452e+07	1.9678	0.0255479	1.28831	0.365475	insig
MEDP1931	C15H20N2O2	Cyclo(Tyr-Leu)	Amino acid and Its metabolites	Small Peptide	82863-65-8	51411.9	122455	45091	100753	152927	328789	402089	4.79242e+06	101832	522032	192852	410286	1.96464	0.2657	8.01259	3.00227	up
MEDP2481	C15H20N2O2	cyclo(leu-phe)	Amino acid and Its metabolites	Small Peptide	7280-77-5	51411.9	122455	45091	100753	152927	328789	402089	4.79242e+06	101832	522032	192852	410286	1.96464	0.2657	8.01259	3.00227	up
MEDP2609	C15H18N4O4	His-Tyr	Amino acid and Its metabolites	Small Peptide	35979-00-1	328605	584188	347963	1.06857e+06	1.03187e+06	541237	1.22163e+06	1.30787e+06	2.23923e+06	658907	658182	3.15767e+06	1.96391	0.078836	2.36865	1.24407	up
MEDP0212	C12H14N2O2	N-Acetyl-5-Hydroxytryptamine	Tryptamines,Cholines,Pigments	Tryptamines	1210-83-9	66667.5	69600.9	32339.1	53808.1	80796.8	72463.5	123543	75256.7	118622	60737.5	92628.1	100572	1.96202	0.0254153	1.52088	0.604908	insig
MEDN1976	C10H20N2O3	Val-Val	Amino acid and Its metabolites	Small Peptide	3918-94-3	793128	616501	973058	1.09153e+06	1.03503e+06	711638	1.36745e+06	1.19572e+06	1.00111e+06	1.18508e+06	857108	2.27872e+06	1.95887	0.0871865	1.51032	0.594852	insig
MW0148485	C35H44N2O9	Dihydro Isorescinnamine	Alkaloids	Alkaloids	6335-49-5	2.07095e+07	2.29833e+07	10135697	1.69398e+07	2.26297e+07	1.95034e+07	2.44994e+07	2.14553e+07	1.97693e+07	3.05447e+07	2.98216e+07	3.34651e+07	1.9577	0.0262213	1.41323	0.498993	insig
MW0053741	C21H42O4	Glyceryl monostearate	GL	MG	123-94-4	436624	368034	542474	330510	303394	451119	290576	1.41391e+06	676050	809499	891106	720043	1.95553	0.0449088	1.97405	0.981156	insig
MW0014350	C29H48O	4,4-dimethyl-5alpha-cholesta-8,14-dien-3beta-ol	Alcohol and amines	Alcohols	-	28928.9	160327	57575.3	32247.2	49107.8	62675.4	23065	22921.7	63124.6	26890.9	18067.7	22995.8	1.95259	0.138549	0.453014	-1.14237	down
MEDN1287	C21H42NO7P	LPE(0:0/16:1)	GP	LPE	-	1.7659e+06	637293	1.08254e+06	733992	1.77767e+06	235884	3.01734e+06	1.61386e+06	2.38629e+06	1.97688e+06	6.3445e+06	876858	1.94367	0.0902827	2.60148	1.37933	up
MEDP2501	C11H23N5O3S	Arg-Met	Amino acid and Its metabolites	Small Peptide	45243-23-0	139154	235625	115359	233577	185711	271214	333812	379821	458987	143273	345211	455780	1.94212	0.0203627	1.793	0.842373	insig
MW0141551	C22H36O3	17beta-Hydroxy-2alpha-(methoxymethyl)-17-methyl-5alpha-androstan-3-one	Aldehyde,Ketones,Esters	Ketones	-	2.35464e+06	1.35031e+06	3.59876e+06	1.69189e+07	2.51884e+06	1.72641e+06	1.12865e+06	2.34702e+06	695885	1.60377e+06	611938	813408	1.92861	0.209423	0.25294	-1.98313	down
MEDP1029	C15H10O4	Hispidol	Heterocyclic compounds	Heterocyclic compounds	5786-54-9	27735.8	20198.5	52437.8	36986.1	27406.7	22694.9	42803.8	49390.7	50136.1	40782.9	31335	74895.4	1.92659	0.0538131	1.5435	0.626204	insig
MEDP0051	C7H14N2O4S	L-Cystathionine	Amino acid and Its metabolites	Amino acid derivatives	56-88-2	54909.1	94935	53484.8	65053.2	80727.4	96503.5	95339.9	128005	128558	73007.5	97415.4	96180.5	1.92601	0.0348638	1.38799	0.472997	insig
MW0144530	C11H21N3O4S1	Ala-Cys-Val	Amino acid and Its metabolites	Small Peptide	-	371231	130499	246224	274989	293273	146115	550850	279919	382332	289055	341279	373287	1.92409	0.0451029	1.51588	0.600158	insig
MEDN1512	C9H14N2O6	5,6-Dihydrouridine	Nucleotide And Its metabolites	Nucleotide And Its metabolites	5627-05-4	106916	64265.9	102192	107017	83910.7	87576.5	119671	188274	145743	84150.5	110159	239992	1.92257	0.0622556	1.60903	0.686192	insig
MW0164390	C27H42O	(3S,10R,13R)-10,13-dimethyl-17-[(2R)-6-methylhept-5-en-2-yl]-2,3,4,9,11,12,14,15,16,17-decahydro-1H-cyclopenta[a]phenanthren-3-ol	Others	Others	-	8.79966e+06	9.07899e+06	4.88473e+06	9.91521e+06	9.631e+06	9.23173e+06	9.54866e+06	1.0722e+07	9.5886e+06	1.16452e+07	1.42322e+07	1.20266e+07	1.90964	0.0272744	1.31474	0.394775	insig
MW0161995	C28H46O	(3S,10R,13R)-10,13-dimethyl-17-[(2R)-6-methyl-5-methylideneheptan-2-yl]-2,3,4,7,8,9,11,12,14,15,16,17-dodecahydro-1H-cyclopenta[a]phenanthren-3-ol	Alcohol and amines	Alcohols	-	108973	258005	127662	196104	264135	241015	78950.7	202489	96352.1	121035	81281.8	114335	1.9075	0.0336475	0.58069	-0.78416	insig
MW0105988	C38H52N6O7	Atazanavir	Benzene and substituted derivatives	Benzene and substituted derivatives	198904-31-3	50207.2	943989	131872	549802	669362	397730	4.01278e+06	984759	1.7662e+06	496032	649193	782455	1.8991	0.130902	3.16862	1.66386	up
MEDN1456	C20H32O5	13,14-dihydro-15-keto PGE2	FA	Oxidized lipids	363-23-5	630300	1.06684e+06	443352	1.44398e+06	479867	446367	405635	534278	357251	217786	538067	380194	1.89905	0.0978229	0.53943	-0.890491	insig
MW0107526	C13H15N3O3	Imazapyr	Organic acid And Its derivatives	Organic acid And Its derivatives	81334-34-1	561394	265713	600799	884591	573196	264760	954422	832704	652369	612213	1.74555e+06	655853	1.88159	0.0925349	1.7309	0.791521	insig
MEDP1875	C22H44NO7P	LPE(17:1/0:0)	GP	LPE	-	605143	187615	189077	305732	500966	274977	711269	4.39586e+06	1.18126e+06	381575	1.51182e+06	252230	1.87619	0.152776	4.08722	2.03112	up
MEDN0140	C5H4N4O2	Xanthine	Nucleotide And Its metabolites	Nucleotide And Its metabolites	69-89-6	3.20242e+06	2.44247e+06	3.41123e+06	3.44085e+06	2.06235e+06	4.06069e+06	4.49272e+06	4.54669e+06	3.29295e+06	4.44519e+06	6.26597e+06	3.25746e+06	1.86561	0.0423717	1.41251	0.498261	insig
MEDP0404	C3H7NO2	Sarcosine	Amino acid and Its metabolites	Amino acids	107-97-1	632043	604049	597954	458163	524861	528311	428842	414738	510355	530119	559763	373843	1.86425	0.0538597	0.842254	-0.247673	insig
MEDN1092	C8H8O3	4-acetoxyphenol	Benzene and substituted derivatives	Phenolics	3233-32-7	1.0954e+07	8.75147e+06	1.17936e+07	1.11033e+07	7.49478e+06	1.43832e+07	1.46681e+07	1.63928e+07	1.12229e+07	1.52197e+07	2.17626e+07	1.11613e+07	1.86322	0.0491283	1.40241	0.487903	insig
MEDP1717	C10H15N3O5	2'-O-methylcytidine	Nucleotide And Its metabolites	Nucleotide And Its metabolites	70475-20-6	985718	522717	565823	437487	928594	243143	1.18595e+06	1.0363e+06	436283	1.01193e+06	1.78205e+06	1.05829e+06	1.86264	0.0537042	1.76757	0.821766	insig
MEDP2494	C10H21N5O4	Thr-Arg	Amino acid and Its metabolites	Small Peptide	13448-26-5	725629	691294	740564	893095	950977	757477	825986	798515	388318	519459	468892	314189	1.85341	0.0407215	0.696645	-0.521504	insig
MW0010442	C18H18O4	(+)-Ligballinol	Lignans and Coumarins	Lignans	-	117026	290108	133165	387288	169474	33374.4	198665	904862	342024	980305	3.59395e+06	2.26688e+06	2.24348	0.0757354	7.33054	2.87392	up
MW0149665	C25H41N9O12	Gln-Gln-Gln-Glu-Gln	Amino acid and Its metabolites	Small Peptide	-	343952	223810	193387	337550	299961	101482	301514	284337	361271	357374	552038	477112	1.84958	0.0368897	1.55562	0.637487	insig
MEDP1982	C5H9N	2-Methyl-1-Pyrroline	Heterocyclic compounds	Heterocyclic compounds	872-32-2	1.63466e+06	2.59735e+06	2.77438e+06	2.42582e+06	2.8063e+06	666098	1.12106e+06	1.05313e+06	843559	1.10313e+06	1.39347e+06	1.10202e+06	1.84818	0.0279139	0.512714	-0.963773	insig
MEDP2551	C8H16N2O3S	Ala-Met	Amino acid and Its metabolites	Small Peptide	14486-05-6	34525.7	177143	25421.7	155489	130789	124822	176759	204464	248159	92772.4	229593	371564	1.8465	0.0358518	2.04155	1.02966	up
MEDP0821	C7H8N2O	6-Methylnicotinamide	Heterocyclic compounds	Pteridines and derivatives	6960-22-1	1.5072e+07	1.0679e+07	1.16274e+07	1.04861e+07	6.80884e+06	7.03474e+06	2.41808e+07	2.86914e+07	7.64893e+06	1.36463e+07	1.64744e+07	1.92443e+07	1.84252	0.0477449	1.78074	0.832475	insig
MW0144112	C18H28O3	9,10-EOT	FA	Oxidized lipids	-	1.28005e+06	2.13879e+06	1.34627e+06	1.16531e+06	1.68469e+06	2.96801e+06	985845	1.51403e+06	1.48582e+06	925866	1.00331e+06	1.04628e+06	1.84113	0.0882799	0.657761	-0.604365	insig
MW0144755	C22H35N5O7	Ala-Thr-Tyr-Lys	Amino acid and Its metabolites	Small Peptide	-	2.14412e+06	140693	121299	324457	209221	162160	421138	3.69378e+06	1.4108e+06	285295	3.66154e+06	1.20741e+06	1.84098	0.113689	3.44298	1.78366	up
MW0124259	C11H14N2	Gramine	Heterocyclic compounds	Heterocyclic compounds	87-52-5	673753	6.36133e+06	1.96176e+06	2.24504e+06	1.78096e+06	146629	148323	85172.8	133384	60955.8	1.3759e+06	1.11217e+06	1.83375	0.117605	0.221414	-2.17518	down
MW0052652	C18H22O2	Estra-4,9-diene-3,17-dione	Aldehyde,Ketones,Esters	Ketones	5173-46-6	3.89393e+06	3.55699e+06	2.5773e+06	5.80603e+06	5.53948e+06	1.97249e+06	5.56254e+06	5.38632e+06	3.39475e+06	5.93186e+06	1.12637e+07	5.90776e+06	1.83304	0.0958484	1.60398	0.681658	insig
MEDP1750	C4H9NO3	L-Allothreonine	Amino acid and Its metabolites	Amino acid derivatives	28954-12-3	1.90197e+07	2.81434e+07	1.23806e+07	2.24434e+07	1.74735e+07	1.99566e+07	2.42367e+07	2.84136e+07	2.03402e+07	2.24789e+07	5.05842e+07	3.97875e+07	1.82976	0.0749342	1.55623	0.638059	insig
MEDP0322	C4H9NO3	L-Homoserine	Organic acid And Its derivatives	Organic acid And Its derivatives	672-15-1	1.90197e+07	2.81434e+07	1.23806e+07	2.24434e+07	1.74735e+07	1.99566e+07	2.42367e+07	2.84136e+07	2.03402e+07	2.24789e+07	5.05842e+07	3.97875e+07	1.82976	0.0749342	1.55623	0.638059	insig
MW0007008	C11H15NO2S	Ethiofencarb	Benzene and substituted derivatives	Benzene and substituted derivatives	29973-13-5	421991	536281	181117	282515	319891	352743	341586	468697	608800	488194	719292	540164	1.82445	0.0331646	1.5119	0.596363	insig
MEDN1269	C27H44NO7P	LPE(0:0/22:6)	GP	LPE	-	175753	106563	69263.6	60883.6	89046.9	36631.6	540350	241527	219815	106554	371120	56208	1.82374	0.0710911	2.85348	1.51272	up
MEDN1270	C27H44NO7P	LPE(22:6/0:0)	GP	LPE	-	175753	106563	69263.6	60883.6	89046.9	36631.6	540350	241527	219815	106554	371120	56208	1.82374	0.0710911	2.85348	1.51272	up
MW0000228	C6H12O6	D-Galactose	Carbohydrates and Its metabolites	Sugars	59-23-4	1.61665e+07	1.63098e+07	1.56461e+07	1.53664e+07	1.55595e+07	1.57483e+07	1.57219e+07	1.53388e+07	1.57399e+07	1.55896e+07	1.48865e+07	1.48181e+07	1.8186	0.0730902	0.9715	-0.0417148	insig
MEDN1329	C26H43NO5	Glycohyodeoxycholic acid	Bile acids	Bile acids	13042-33-6	42220.3	43032.9	8032.41	47805.4	41850.3	148061	39872.9	11798.3	11955.7	10359.2	9932.71	18823.4	1.81507	0.110249	0.310397	-1.68781	down
MEDP2576	C11H18N4O3	Val-His	Amino acid and Its metabolites	Small Peptide	13589-07-6	1.45354e+06	1.67469e+06	777627	1.93908e+06	1.79369e+06	1.90454e+06	1.99995e+06	2.02866e+06	2.1064e+06	2.08397e+06	1.83766e+06	3.72324e+06	1.8119	0.0690106	1.44395	0.530024	insig
MEDP2335	C6H12N2O4	Gly-Thr	Amino acid and Its metabolites	Small Peptide	7093-70-1	533453	396031	488807	909120	685411	462217	723863	900422	558596	658780	774894	1.40198e+06	1.81098	0.111122	1.44417	0.530237	insig
MW0166430	C30H50O2	(3S)-3-[(3E,7E,11E,15E)-18-[(2S)-3,3-dimethyloxiran-2-yl]-3,7,12,16-tetramethyloctadeca-3,7,11,15-tetraenyl]-2,2-dimethyloxirane	Heterocyclic compounds	Heterocyclic compounds	-	38637.6	956659	63960.4	617311	294932	769470	176808	68864	284591	19275.4	3172.91	17342.2	1.80789	0.0686172	0.207975	-2.26552	down
MEDP1670	C13H17N3O4	Gly-Gly-Phe	Amino acid and Its metabolites	Small Peptide	6234-26-0	1.32839e+06	497432	785914	1.44638e+06	1.23938e+06	471973	2.6045e+06	1.55049e+06	694640	1.35739e+06	1.78957e+06	1.64676e+06	1.80364	0.0663618	1.67144	0.741095	insig
MEDN1538	C12H22O11	GalactinolHydrate	Carbohydrates and Its metabolites	Sugar alcohols	3687-64-7	112760	171654	215503	242603	169456	180851	207301	180710	294718	232782	341116	232134	1.79219	0.0558961	1.3623	0.446047	insig
MW0145543	C21H34N6O5	Arg-Tyr-Ile	Amino acid and Its metabolites	Small Peptide	-	457415	867444	331599	590782	809195	1.16039e+06	757793	1.73509e+06	1.01836e+06	739311	1.14777e+06	1.12644e+06	1.79179	0.0751817	1.54732	0.629769	insig
MEDN0835	C6H8O6	D-Glucuronolactone	Aldehyde,Ketones,Esters	Esters	32449-92-6	8669.37	6221.14	7013.63	10277.4	12722.4	12961.9	11457.7	12783.7	27163.5	10604.6	10048.7	27607.3	1.78442	0.101563	1.72236	0.784383	insig
MW0144565	C14H25N3O6	Ala-Glu-Leu	Amino acid and Its metabolites	Small Peptide	-	482918	118117	646106	300639	551698	153315	721738	447505	403414	519131	556322	1.15083e+06	1.77925	0.104714	1.68632	0.753882	insig
MW0123237	C15H12ClNO2	Carprofen	Others	Medicine	53716-49-7	260703	1.84172e+06	1.14027e+06	1.45659e+06	1.6601e+06	2.48143e+06	287377	200407	305197	142143	1.32358e+06	1.10429e+06	1.77303	0.0357451	0.380393	-1.39444	down
MW0006430	C29H41NO4	Buprenorphine	Benzene and substituted derivatives	Benzene and substituted derivatives	52485-79-7	1.92355e+06	415123	1.329e+06	1.02256e+06	2.26738e+06	287286	2.69126e+06	1.24236e+06	1.45821e+06	2.37316e+06	4.08354e+06	1.42046e+06	1.7719	0.100267	1.8315	0.873022	insig
MW0157513	C30H42N2O2S	Thiobinupharidine	Heterocyclic compounds	Heterocyclic compounds	30343-72-7	126633	179937	121582	186306	258927	166645	174365	173250	255455	254673	376270	207618	1.76703	0.106046	1.38615	0.471078	insig
MW0152851	C20H37N5O7	Lys-Ala-Leu-Glu	Amino acid and Its metabolites	Small Peptide	-	9.44744e+06	584171	554669	1.58853e+06	826870	624173	1.60092e+06	1.51167e+07	5.68537e+06	1.17967e+06	1.37007e+07	5.15867e+06	1.76439	0.12839	3.11481	1.63915	up
MW0052762	C24H32O4	Ethynodiol diacetate	Aldehyde,Ketones,Esters	Esters	297-76-7	1.34909e+08	1.49091e+08	8.94208e+07	1.18039e+08	5.75263e+07	1.61203e+08	1.58119e+08	150664552	1.91162e+08	1.52389e+08	1.99226e+08	1.764e+08	1.76158	0.0197767	1.44745	0.533509	insig
MEDP2466	C17H23N3O3	Leu-Trp	Amino acid and Its metabolites	Small Peptide	5156-22-9	532047	251197	380464	740779	693751	302415	877220	463147	490940	783668	1.01392e+06	619548	1.75419	0.0976352	1.46465	0.550557	insig
MW0012718	C20H32O3	19(R)-HETE	FA	Others	115461-39-7	602110	317114	994200	761803	560190	699005	995102	1.25864e+06	636768	1.04653e+06	770328	819225	1.75387	0.0676885	1.40468	0.490239	insig
MEDP2590	C10H14N6O4	2-Aminoadenosine	Nucleotide And Its metabolites	Nucleotide And Its metabolites	2096-10-8	71402.5	24237.4	174419	97654.3	112223	77517.2	116453	169087	84880	149337	235454	134440	1.75369	0.0879153	1.59592	0.674391	insig
MEDP0251	C7H7NO2	Trigonelline	CoEnzyme and vitamins	CoEnzyme and vitamins	535-83-1	452821	232542	252875	301505	359780	344078	491952	497505	580387	270413	1.19534e+06	369033	1.74967	0.129804	1.75171	0.808764	insig
MEDN1410	C18H35NO3	N-Palmitoylglycine	Amino acid and Its metabolites	Amino acid derivatives	2441-41-0	300453	362950	511592	1.03957e+06	406942	428112	316612	389802	351604	274269	292066	283547	1.74481	0.145692	0.625619	-0.676643	insig
MEDN0065	C3H8NO6P	O-Phospho-L-Serine	Amino acid and Its metabolites	Amino acid derivatives	407-41-0	298190	195191	239479	172726	197785	186439	142854	170070	167248	106693	258717	70742.3	1.74072	0.0865205	0.710435	-0.493226	insig
MEDN0562	C9H9NO	Indole 3-carbinol	Heterocyclic compounds	Indole and Its derivatives	700-06-1	7.86543e+06	5.79962e+06	4.95301e+06	6.65319e+06	4.66429e+06	3.79376e+06	7.58764e+06	6.2163e+06	5.47548e+06	8.46922e+06	1.07607e+07	7.40285e+06	1.73631	0.0634261	1.36119	0.444873	insig
MEDN0765	C20H32O3	11,12-EET	FA	Oxidized lipids	123931-40-8	3.02651e+06	698470	1.72434e+06	2.9806e+06	6.62504e+06	1.87109e+06	4.0426e+06	9.90131e+06	9.84501e+06	3.93888e+06	1.67583e+06	5.67671e+06	1.73214	0.0960285	2.07256	1.05142	up
MW0127585	C18H18O5	(-)-3,4,9-Trimethoxypterocarpan	Flavonoids	Flavonoid	-	3.17935e+06	1.54033e+06	1.23713e+06	3.4473e+06	1.79678e+06	258280	4307454	2.95352e+06	896731	5.38679e+06	2.13436e+07	7.04793e+06	1.72858	0.152153	3.6596	1.87169	up
MEDN1006	C5H4N4O3	Uric acid	Organic acid And Its derivatives	Organic acid And Its derivatives	69-93-2	1.0998e+06	987854	1.52339e+06	1.52539e+06	1.02701e+06	2.36224e+06	1.73052e+06	2.19063e+06	1.43279e+06	2.01393e+06	2.85459e+06	1.57787e+06	1.7267	0.0981429	1.38409	0.468938	insig
MW0144913	C18H20O4	alpha,alpha'-Diethyl-3,4,3',4'-stilbenetetraol	Benzene and substituted derivatives	Benzene and substituted derivatives	-	1.39553e+06	1.72672e+06	2.40826e+06	3.75992e+06	1.81742e+06	126961	3.92874e+06	2.58546e+06	2.36622e+06	2.58032e+06	1.23952e+07	5.46493e+06	1.72522	0.118042	2.60983	1.38395	up
MEDN0398	C20H32O2	AA	FA	Oxidized lipids	506-32-1	1.38499e+07	4.94606e+06	6.26431e+06	1.49832e+07	1.92197e+07	1.33777e+07	1.53096e+07	1.97373e+07	3.04909e+07	1.83368e+07	1.11953e+07	1.74039e+07	1.72324	0.0846386	1.54835	0.630735	insig
MEDN0852	C7H7NO3	3-Amino-4-Hydroxybenzoic Acid	Benzene and substituted derivatives	Phenolic acids	1571-72-8	791948	707449	834079	870952	700949	1.22382e+06	1.17575e+06	1.18372e+06	835959	1.07552e+06	1.5114e+06	841293	1.72311	0.085961	1.29136	0.368891	insig
MEDN2067	C7H7NO3	3-Amino-5-hydroxybenzoic acid	Organic acid And Its derivatives	Organic acid And Its derivatives	76045-71-1	791948	707449	834079	870952	700949	1.22382e+06	1.17575e+06	1.18372e+06	835959	1.07552e+06	1.5114e+06	841293	1.72311	0.085961	1.29136	0.368891	insig
MEDN0093	C7H7NO3	3-Hydroxyanthranilic Acid	Benzene and substituted derivatives	Phenolic acids	548-93-6	791948	707449	834079	870952	700949	1.22382e+06	1.17575e+06	1.18372e+06	835959	1.07552e+06	1.5114e+06	841293	1.72311	0.085961	1.29136	0.368891	insig
MEDP2131	C3H7NO3	L-Isserine	Amino acid and Its metabolites	Amino acid derivatives	632-13-3	1.7868e+07	1.18496e+07	1.65503e+07	2.08227e+07	1.27322e+07	8.3545e+06	1.87612e+07	1.56859e+07	1.44459e+07	2.00533e+07	40939471	3.10459e+07	1.72252	0.0999616	1.59828	0.676517	insig
MEDP0638	C21H42NO7P	LPE(16:1/0:0)	GP	LPE	-	124074	9124.35	94369.5	104291	155918	18845.3	182899	106783	113193	145044	357739	91314.5	1.72138	0.120367	1.96788	0.976644	insig
MW0107590	C15H32FO2P	Isopropyl dodecylfluorophosphonate	Aldehyde,Ketones,Esters	Esters	615250-02-7	537301	387258	409099	416272	427700	231381	637325	603291	591783	467208	602535	351370	1.71857	0.0423538	1.35056	0.433557	insig
MW0059176	C42H58O4	Peltatol A	GP	PE	-	2.77264e+07	3.61986e+06	1.09263e+07	3.16752e+07	3.9101e+07	1.28316e+07	3.62125e+07	32727258	4.14968e+07	3.71633e+07	1.9344e+07	3.38708e+07	1.71732	0.0895213	1.59528	0.673812	insig
MEDN1156	C20H32O2	FFA(20:4)	FA	FFA	82073-91-4	431089	110014	207791	419196	575417	348196	453201	571200	855412	539430	332427	492729	1.7171	0.0807394	1.55108	0.633274	insig
MEDN0704	C4H4O5	Oxaloacetic acid	Organic acid And Its derivatives	Organic acid And Its derivatives	328-42-7	115413	210051	91845.6	111353	180720	209261	149801	304155	150423	170566	288427	307729	1.71446	0.0852053	1.49253	0.577759	insig
MW0144082	C23H32O5	8-iso-17-phenyl trinor Prostaglandin F2	Hormones and hormone related compounds	Hormones and hormone related compounds	-	9.73137e+06	3.03152e+06	5.23459e+06	1.03938e+07	1.17085e+07	5.37333e+06	1.14694e+07	1.14845e+07	1.32413e+07	1.20268e+07	6.59582e+06	1.05485e+07	1.7121	0.0843359	1.43747	0.523536	insig
MEDP0387	C7H16N4O2	L-Homoarginine	Amino acid and Its metabolites	Amino acids	156-86-5	186402	196111	102356	164830	267318	247982	183516	370550	299949	196527	254580	331963	1.71153	0.0724288	1.40522	0.490801	insig
MEDN1953	C9H18N2O4	Thr-Val	Amino acid and Its metabolites	Small Peptide	99032-17-4	269060	203638	240176	394717	478979	392319	411805	469441	589616	373717	286975	1.02307e+06	1.70857	0.13828	1.59414	0.672777	insig
MEDN1946	C9H16N2O5	Val-Asp	Amino acid and Its metabolites	Small Peptide	20556-16-5	1.19501e+06	248829	431105	363985	616435	233926	852346	771145	443973	774241	644266	1.21616e+06	1.70581	0.17095	1.52207	0.606038	insig
MEDN1421	C20H32O3	(±)8-HETE	FA	Oxidized lipids	98462-03-4	292986	64229.6	157397	242604	539274	219732	323706	755072	883439	281993	203077	454856	1.70523	0.113784	1.91406	0.936637	insig
MW0157398	C28H39NO3	Terpendole E	Heterocyclic compounds	Heterocyclic compounds	-	1.38352e+07	690751	1.25934e+06	2.33331e+06	1.14944e+06	768066	2.28734e+06	2.18379e+07	8.01144e+06	1.67626e+06	1.47487e+07	6.78718e+06	1.70184	0.158186	2.76246	1.46595	up
MEDN1246	C6H9N3O2	3-(pyrazol-1-yl)-L-alanine	Amino acid and Its metabolites	Amino acid derivatives	2734-48-7	150333	218107	77288.1	123817	186921	210731	207553	177647	532902	153609	264044	365562	1.70052	0.0958892	1.75902	0.814769	insig
MEDP1511	C10H18N2O5S	Met-Glu	Amino acid and Its metabolites	Small Peptide	14517-44-3	15314.4	185795	11160.6	86016.8	96980.7	34193	143992	251271	94105.2	35451.1	1.03955e+06	126704	1.69823	0.234047	3.93766	1.97734	up
MW0141660	C25H42O3	19-(4-Hydroxyphenyl)nonadecanoate	FA	Oxidized lipids	-	115761	31298.3	63206.2	114960	134265	58610	123850	126807	155816	133601	80886.3	119735	1.69658	0.0915292	1.42964	0.515648	insig
MW0142882	C18H36N4O11	3''-Deamino-3''-hydroxykanamycin B	Heterocyclic compounds	Heterocyclic compounds	31077-70-0	1.99221e+06	313391	801928	2.14704e+06	2.21542e+06	1.15875e+06	1.9983e+06	2.98089e+06	2.43357e+06	3.21838e+06	1.25168e+06	2.09414e+06	1.69334	0.0686781	1.61982	0.695831	insig
MEDP0389	C11H22N2O4S	Pantetheine	CoEnzyme and vitamins	CoEnzyme and vitamins	496-65-1	5.26094e+07	6.53419e+07	3.69696e+07	5.2773e+07	5.65942e+07	6.73348e+07	6.09018e+07	5.927e+07	6.56008e+07	6.61284e+07	7.54007e+07	6.7822e+07	1.69073	0.0707415	1.19149	0.252761	insig
MEDN0551	C11H9NO2	3-Indoleacrylic acid	Organic acid And Its derivatives	Organic acid And Its derivatives	1204-06-4	41779.4	55859.3	14869.5	8904.5	18951.8	32723.6	101802	61001.6	14464.9	60652.3	93580	46742.8	1.68957	0.0515615	2.18527	1.12781	up
MEDP2007	C9H9NO	3-Methyloxindole	Heterocyclic compounds	Indole and Its derivatives	1504-06-9	627092	157181	2.57764e+06	1.66638e+06	228484	276060	65641.1	241704	215038	99169.6	668517	175751	1.68357	0.156	0.264931	-1.91631	down
MEDP0519	C6H13NO2	L-Norleucine	Amino acid and Its metabolites	Amino acids	327-57-1	1.17063e+06	783845	808870	1.00047e+06	794179	502880	1.38732e+06	825106	808422	1.38736e+06	2.14476e+06	1.04905e+06	1.68343	0.101039	1.50211	0.586993	insig
MW0150762	C9H16N3O2	Hercynine	Heterocyclic compounds	Heterocyclic compounds	534-30-5	285871	258963	384645	470763	247890	273127	173269	416588	258369	236390	84988.5	151218	1.68302	0.123104	0.687478	-0.540615	insig
MEDP1060	C9H7NO	Hydroxyquinoline	Heterocyclic compounds	Heterocyclic compounds	148-24-3	2.9759e+06	1.78462e+06	1.71321e+06	2.35152e+06	1.75734e+06	1.0336e+06	3.32567e+06	2.01217e+06	1.74016e+06	3.33685e+06	5.90881e+06	2.60206e+06	1.68226	0.112325	1.62925	0.704211	insig
MEDP2606	C14H20N2O4S	Met-Tyr	Amino acid and Its metabolites	Small Peptide	13589-04-3	49907.9	125377	5791.73	235428	108098	117946	250922	141524	214631	104464	344461	307214	1.68041	0.0365793	2.12157	1.08514	up
MEDP2527	C4H9NO3	4-Amino-3-hydroxybutyric acid	Others	Medicine	924-49-2	2.71467e+06	3.71191e+06	2.63123e+06	3.99847e+06	2.6551e+06	3.47157e+06	3.6238e+06	4.04564e+06	3.23361e+06	3.32223e+06	8.11896e+06	5.75309e+06	1.68039	0.120768	1.4647	0.550608	insig
MEDN1608	C22H36O2	FFA(22:4)	FA	FFA	28874-58-0	400146	1.10381e+06	569091	768150	822237	1.2658e+06	951890	1.63066e+06	847754	935231	1.09159e+06	1.52086e+06	1.67206	0.100591	1.41563	0.501445	insig
MEDP2329	C11H23N3O3	Lys-Val	Amino acid and Its metabolites	Small Peptide	20556-11-0	4.47896e+06	3.26072e+06	3.88806e+06	5.78152e+06	6.5739e+06	4.99785e+06	8.58769e+06	7.84906e+06	8.21336e+06	5.11164e+06	3.33889e+06	1.3093e+07	1.66957	0.0933913	1.59393	0.672586	insig
MW0168220	C20H34O4	Aphidicolin	Alcohol and amines	Alcohols	38966-21-1	7.68906e+06	6.78216e+06	6.4834e+06	2.25955e+07	6.39662e+06	5.86059e+06	5.39416e+06	6.92252e+06	4.96839e+06	7.73876e+06	2.9469e+06	3.62776e+06	1.66602	0.19783	0.566207	-0.820598	insig
MW0110915	C44H82NO6PS	Arachidonoyl thio-PC	Benzene and substituted derivatives	Benzene and substituted derivatives	146797-82-2	406063	39903.6	218995	650436	872445	53381.1	389238	971316	379123	916276	357636	849537	1.66513	0.170927	1.72367	0.785482	insig
MW0132950	C31H24O11	3-[5,7-dihydroxy-2-(4-hydroxy-3-methoxyphenyl)-4-oxo-3,4-dihydro-2H-1-benzopyran-8-yl]-5,7-dihydroxy-2-(4-hydroxyphenyl)-3,4-dihydro-2H-1-benzopyran-4-one	Benzene and substituted derivatives	Benzene and substituted derivatives	-	832794	437725	809958	607482	439562	315596	976015	581332	431982	3.27162e+06	972100	1.58448e+06	1.66437	0.1501	2.27048	1.183	up
MEDP1671	C16H27N3O8	Glu-Glu-Ile	Amino acid and Its metabolites	Small Peptide	-	245504	10371.1	170999	381374	203703	24124.7	457360	364821	187739	309969	196067	327028	1.66257	0.090017	1.77881	0.830913	insig
MEDN1970	C10H14N2O6	cyclo(glu-glu)	Amino acid and Its metabolites	Small Peptide	16691-00-2	177676	29945.8	178001	189662	135716	34116.5	146753	334967	199634	178748	140868	246329	1.6619	0.0766626	1.67397	0.74327	insig
MEDP2348	C8H14N2O6	Glu-Ser	Amino acid and Its metabolites	Small Peptide	5875-38-7	1.49663e+06	415004	1.14182e+06	1.52437e+06	1.12153e+06	550907	1.36251e+06	1.09251e+06	1.29986e+06	1.33296e+06	1.78728e+06	2.31801e+06	1.66029	0.0927215	1.47084	0.556641	insig
MEDP1509	C10H18N2O5S	Glu-Met	Amino acid and Its metabolites	Small Peptide	4423-22-7	72606.4	526694	19387.2	344350	162918	167156	352099	355108	350277	207081	3.20024e+06	356813	1.65902	0.277888	3.72869	1.89867	up
MW0145522	C22H45N11O6	Arg-Thr-Lys-Arg	Amino acid and Its metabolites	Small Peptide	-	4.51519e+06	2.53862e+06	2.65153e+06	4.2657e+06	3.43977e+06	3.17077e+06	3.5266e+06	4.15791e+06	4.04044e+06	3.69599e+06	6.52657e+06	4.62502e+06	1.65882	0.106558	1.29108	0.368582	insig
MEDN0856	C8H8O3	2',4'-Dihydroxyacetophenone	Benzene and substituted derivatives	Benzene and substituted derivatives	89-84-9	342934	228135	178688	415905	393376	48724.7	501912	268057	448230	391835	525085	451674	1.65735	0.0439567	1.60894	0.68611	insig
MEDN0748	C8H8O3	Methylparaben	Benzene and substituted derivatives	Phenolic acids	99-76-3	342934	228135	178688	415905	393376	48724.7	501912	268057	448230	391835	525085	451674	1.65735	0.0439567	1.60894	0.68611	insig
MEDP0025	C11H12N2O2	L-Tryptophan	Amino acid and Its metabolites	Amino acids	73-22-3	1.43139e+06	973456	760808	1.29714e+06	839710	454393	2.11402e+06	1.0174e+06	836648	1.97786e+06	4.26548e+06	1.11841e+06	1.65318	0.139248	1.96804	0.976761	insig
MEDP1127	C10H9NO	1-acetylindole	Heterocyclic compounds	Indole and Its derivatives	576-15-8	776563	524951	398365	693025	442798	206459	852791	529612	467392	991638	1.77089e+06	708213	1.65317	0.116844	1.74893	0.806475	insig
MEDN1919	C7H13N3O4	Asn-Ala	Amino acid and Its metabolites	Small Peptide	20917-57-1	122096	75360.7	69904.5	157721	149684	106359	109110	239052	179583	102283	148441	492573	1.65211	0.164956	1.86609	0.900018	insig
MW0116362	C24H31NO4	1-(3,4-Diethoxybenzylidene)-6,7-diethoxy-1,2,3,4-tetrahydroisoquinoline	Benzene and substituted derivatives	Benzene and substituted derivatives	14009-24-6	886093	396667	515126	1.12276e+06	592274	545790	1.29288e+06	453959	1.79247e+06	670015	1.76906e+06	1.55448e+06	1.65094	0.058956	1.85598	0.892179	insig
MEDN1501	C10H14N2O6	2'-O-methyluridine	Nucleotide And Its metabolites	Nucleotide And Its metabolites	2140-76-3	78381.3	89110	42678.5	100202	88557.9	54960.7	72842.4	140851	78994.3	83099.1	229147	118239	1.65089	0.13062	1.59328	0.671997	insig
MW0158444	C24H38N6O8	Tyr-Gln-Thr-Lys	Amino acid and Its metabolites	Small Peptide	-	140395	36495.1	69314.9	111291	112381	27493.4	121355	88443.8	110318	102344	486422	126918	1.64978	0.222008	2.08255	1.05835	up
MEDP1273	C25H43NO6	10-deoxyformamycin	Others	Others	11091-33-1	1.48482e+06	236618	658812	1.03262e+06	1.21472e+06	220792	1.26381e+06	898212	1.16288e+06	955121	3.59602e+06	1.0737e+06	1.64409	0.191221	1.84592	0.88434	insig
MEDP2595	C14H17N3O4	Ser-Trp	Amino acid and Its metabolites	Small Peptide	94421-70-2	367577	116064	258393	338139	360903	129617	529188	277554	374276	308324	298163	441806	1.64238	0.105455	1.41932	0.505198	insig
MEDP2529	C6H13NO2	D-Allo-Isoleucine	Amino acid and Its metabolites	Amino acids	1509-35-9	4.81654e+08	3.61743e+08	3.30062e+08	4.14799e+08	3.59287e+08	2.70005e+08	1.86866e+08	1.76924e+08	3.63975e+08	4.2576e+08	1.82524e+08	3.41026e+08	1.64184	0.130259	0.756274	-0.40302	insig
MW0144788	C22H40N6O7	Ala-Val-Ala-Ile-Gln	Amino acid and Its metabolites	Small Peptide	-	9509.72	5775.12	38903.3	35153.8	51484.8	41758.5	833412	60542.1	89272	41698	69563.6	13545.2	1.64159	0.289688	6.06858	2.60136	up
MEDP1294	C8H16N2O3	Leu-Gly	Amino acid and Its metabolites	Small Peptide	686-50-0	2.72242e+07	6.70964e+06	2.1641e+07	3.02803e+07	2.8313e+07	5.36317e+06	5.65982e+07	1.36082e+07	2.09078e+07	4.30713e+07	3.40007e+07	4.90848e+07	1.64121	0.0780238	1.81769	0.862107	insig
MEDP2467	C17H23N3O3	Ile-Trp	Amino acid and Its metabolites	Small Peptide	13589-06-5	502973	222102	402871	831229	693131	318389	888491	456299	525399	796594	911723	584362	1.64066	0.14015	1.40131	0.486778	insig
MW0049235	C22H30O	Desogestrel	Alcohol and amines	Alcohols	54024-22-5	250388	2.67375e+06	440102	292293	599511	1.94974e+06	154917	673863	603383	303131	87347.6	203886	1.63636	0.159721	0.326554	-1.6146	down
MEDP1434	C11H19NO6	Carnitine C4:DC	FA	CAR	-	193768	88762.9	131505	148196	87771.2	119881	305713	209938	316644	140007	111727	165900	1.6339	0.0773402	1.62353	0.699134	insig
MEDN0266	C9H7NO	Indole-3-Carboxaldehyde	Heterocyclic compounds	Indole and Its derivatives	487-89-8	324242	166569	271871	338502	508174	236067	418803	634594	372937	346296	276150	414824	1.63258	0.164697	1.33498	0.416817	insig
MEDN1039	C9H7NO	Indole-4-carboxaldehyde	Heterocyclic compounds	Indole and Its derivatives	1074-86-8	324242	166569	271871	338502	508174	236067	418803	634594	372937	346296	276150	414824	1.63258	0.164697	1.33498	0.416817	insig
MEDN0751	C20H32O3	(±)12-HETE	FA	Oxidized lipids	71030-37-0	1.71826e+06	367371	796168	1.61929e+06	3.43413e+06	837071	2.42955e+06	4.20096e+06	4.21384e+06	1.98644e+06	759550	2.49856e+06	1.62228	0.115871	1.83406	0.87504	insig
MEDP2143	C16H33NO3	N,N-Bis(2-hydroxyethyl)dodecanamide	FA	Others	120-40-1	102833	128930	82809.6	89671.7	95330.8	92692.7	97120.1	109860	116646	163304	277252	111816	1.62102	0.153384	1.47906	0.564676	insig
MEDP1170	C18H34O	9-Octadecenal	Aldehyde,Ketones,Esters	Aldehydes	5090-41-5	3.2044e+06	3.88025e+06	2.84802e+06	3.62245e+06	3.55506e+06	3.77065e+06	3.66265e+06	3.91964e+06	3.69528e+06	3.47632e+06	4.0654e+06	4.80099e+06	1.62005	0.0973654	1.13119	0.177846	insig
MEDN1279	C23H48NO7P	LPE(0:0/18:0)	GP	LPE	-	1.29071e+07	1.20189e+06	1.50184e+06	1.18118e+06	7.46441e+06	878129	5.94014e+06	5.85163e+06	6.36396e+06	3.68349e+06	5.90839e+06	5.43599e+06	1.61857	0.541921	1.32024	0.400798	insig
MEDN0364	C23H48NO7P	LPE(18:0/0:0)	GP	LPE	-	1.29071e+07	1.20189e+06	1.50184e+06	1.18118e+06	7.46441e+06	878129	5.94014e+06	5.85163e+06	6.36396e+06	3.68349e+06	5.90839e+06	5.43599e+06	1.61857	0.541921	1.32024	0.400798	insig
MEDP2345	C11H18N4O3	His-Val	Amino acid and Its metabolites	Small Peptide	76019-15-3	1.44291e+06	1.72783e+06	730247	2.05766e+06	1.6954e+06	2.08666e+06	2.09205e+06	2.14937e+06	2.13204e+06	1.83293e+06	1.76278e+06	3.97227e+06	1.61737	0.111929	1.43126	0.517281	insig
MW0153011	C14H28N4O4	Lys-Ile-Gly	Amino acid and Its metabolites	Small Peptide	-	1.17849e+06	302964	493193	749793	752249	285530	2.93648e+06	1.28269e+06	631807	540166	666251	1.37081e+06	1.616	0.169148	1.97442	0.981429	insig
MEDP1701	C26H52NO7P	LPC(0:0/18:1)	GP	LPC	-	8.42549e+07	8.20141e+07	5.1088e+06	1.7818e+06	2.60759e+07	4.24546e+07	173559868	1.03409e+08	1.84396e+08	2.407e+07	112845738	4.04584e+07	1.61598	0.064562	2.6428	1.40207	up
MEDP1339	C26H52NO7P	LPC(18:1/0:0)	GP	LPC	3542-29-8	8.42549e+07	8.20141e+07	5.1088e+06	1.7818e+06	2.60759e+07	4.24546e+07	173559868	1.03409e+08	1.84396e+08	2.407e+07	112845738	4.04584e+07	1.61598	0.064562	2.6428	1.40207	up
MEDN1942	C9H18N2O4	Val-Thr	Amino acid and Its metabolites	Small Peptide	72636-02-3	2.48878e+06	9.12044e+06	1.16348e+06	1.73444e+06	4.22086e+06	9.85463e+06	4.69683e+06	7.00009e+06	1.83198e+07	4.12736e+06	1.0497e+07	1.05568e+07	1.61458	0.127512	1.93117	0.949474	insig
MW0152321	C17H31N3O6	Leu-Glu-Ile	Amino acid and Its metabolites	Small Peptide	-	1.30025e+06	283969	278761	2.09025e+06	1.79905e+06	768889	3.25226e+06	2.59979e+06	997801	1.00826e+06	1.01012e+06	2.81786e+06	1.61253	0.139864	1.79203	0.841591	insig
MEDP2581	C9H14N2O7	Asp-Glu	Amino acid and Its metabolites	Small Peptide	6157-06-8	347860	192535	251467	251281	447532	206807	623863	382482	431019	251109	235110	560974	1.61103	0.120746	1.46367	0.549592	insig
MEDL00392	C26H52NO7P	1-Oleoyl-sn-glycero-3-phosphocholine	GP	LPC	19420-56-5	1.83931e+06	2.87949e+06	148236	107445	589374	1.15293e+06	5.23858e+06	2.2386e+06	2.80992e+06	706287	3.89028e+06	1.1078e+06	1.61065	0.0960856	2.38082	1.25146	up
MEDP2047	C11H16N2O8	N-Acetyl-Asp-Glu	Amino acid and Its metabolites	Small Peptide	3106-85-2	203029	145554	257158	238787	188191	76956.9	361416	303579	161313	238654	228197	266474	1.60563	0.0819045	1.40548	0.491068	insig
MEDP2589	C10H20N2O3S2	Met-Met	Amino acid and Its metabolites	Small Peptide	7349-78-2	11069.4	96312.1	9076.08	82278.6	36380.8	67780.1	92942.1	58015.3	81292.3	41706.2	246568	99786.8	1.60346	0.15701	2.04792	1.03416	up
MEDN1478	C10H17N3O6	Glu-Gln	Amino acid and Its metabolites	Small Peptide	-	447222	99752.3	325554	420766	304089	187162	266557	434522	482194	412848	386568	729958	1.59875	0.0937134	1.52008	0.604145	insig
MEDN1940	C10H17N3O6	γ-Glu-Gln	Amino acid and Its metabolites	Small Peptide	10148-81-9	447222	99752.3	325554	420766	304089	187162	266557	434522	482194	412848	386568	729958	1.59875	0.0937134	1.52008	0.604145	insig
MEDP1666	C14H27N3O5	Leu-Val-Ser	Amino acid and Its metabolites	Small Peptide	-	6.48795e+06	636325	6.34009e+06	4.10441e+06	2.05781e+06	601029	8.22366e+06	7.41234e+06	3.73365e+06	5.61122e+06	5.00568e+06	3.57725e+06	1.59718	0.132026	1.65931	0.730581	insig
MEDL00401	C15H22O2	Confertifoline	Aldehyde,Ketones,Esters	Esters	1811-23-0	9803.55	17695.2	9658.78	8756.54	12656.4	14905.9	12415.3	16431.2	14064.1	13682.4	22495.8	14931.4	1.59668	0.126564	1.2796	0.355688	insig
MEDP2334	C3H9NO	(R)-(-)-1-Amino-2-propanol	Alcohol and amines	Amines	2799-16-8	3.31715e+06	4.35412e+06	4.14275e+06	4.0423e+06	3.67255e+06	4.00887e+06	3.19217e+06	3.11497e+06	3.3461e+06	3.26486e+06	3.56419e+06	4.44569e+06	1.59281	0.117436	0.889125	-0.169541	insig
MW0139523	C23H22O13	Quercetin 3-O-beta-D-glucose-6'-acetate	Flavonoids	Flavonoid	54542-51-7	10506.9	31948	7113.41	10885.4	10760.4	24458.8	19821.7	20268.9	23809.5	18887.6	29701	23444.5	1.59257	0.169667	1.42082	0.506719	insig
MW0142453	C17H32O3	2-Methoxy-5Z-hexadecenoic acid	Organic acid And Its derivatives	Organic acid And Its derivatives	-	254919	589399	242978	321203	440812	608559	447452	529103	499278	601860	788810	426647	1.5922	0.136956	1.33984	0.42206	insig
MEDP1699	C24H48NO7P	LPC(0:0/16:1)	GP	LPC	-	7.80599e+06	1.07784e+07	824707	156877	4.5882e+06	9.77961e+06	2.36424e+07	1.98466e+07	1.79371e+07	3.70162e+06	1.47495e+07	5.44212e+06	1.59206	0.0528474	2.51429	1.33015	up
MEDP1348	C24H48NO7P	LPC(16:1/0:0)	GP	LPC	-	7.80599e+06	1.07784e+07	824707	156877	4.5882e+06	9.77961e+06	2.36424e+07	1.98466e+07	1.79371e+07	3.70162e+06	1.47495e+07	5.44212e+06	1.59206	0.0528474	2.51429	1.33015	up
FDATP01317	C22H26BrNO3	Clidinium Bromide	Benzene and substituted derivatives	Benzene and substituted derivatives	3485-62-9	866072	446330	512927	986578	526978	512474	1.22603e+06	400810	1.70366e+06	626508	1.80664e+06	1.53484e+06	1.59193	0.0622334	1.89504	0.92223	insig
MW0124277	C32H45NO4	Gymnodimine	Heterocyclic compounds	Heterocyclic compounds	173792-58-0	609949	728205	53078.7	25634.1	165873	337204	1.49357e+06	763431	977728	195885	1.23675e+06	255045	1.59153	0.0756471	2.56383	1.3583	up
MEDN0169	C4H4N2O2	Uracil	Nucleotide And Its metabolites	Nucleotide And Its metabolites	66-22-8	4.32039e+06	4.52794e+06	3.36745e+06	5.53584e+06	8.62966e+06	6.49008e+06	3.63365e+06	4.54798e+06	3.7878e+06	3.05292e+06	4.26646e+06	3.7488e+06	1.59127	0.0871332	0.700841	-0.512841	insig
MW0009910	C23H32N2O2S	Thiocarlide	Benzene and substituted derivatives	Benzene and substituted derivatives	910-86-1	5.06276e+06	657097	2.15079e+06	6.8419e+06	7.07162e+06	1.76106e+06	7.93044e+06	7.79763e+06	4.84402e+06	7.55336e+06	2.50002e+06	7.2341e+06	1.58868	0.129936	1.60795	0.685224	insig
MW0109696	C18H28N6O6	Ser-Tyr-Arg	Amino acid and Its metabolites	Small Peptide	-	4.57593e+06	5.3664e+06	3.69819e+06	3.18806e+06	4.61164e+06	5.73993e+06	5.0393e+06	5.23121e+06	4.79065e+06	4.46197e+06	7.32727e+06	7.0232e+06	1.57716	0.110572	1.24626	0.317608	insig
MEDP1998	C3H8N2O2	2,3-Diaminopropionic acid	Amino acid and Its metabolites	Amino acids	515-94-6	66089	31291.2	36244.3	151603	158152	86951.3	143247	233303	197561	57728.3	81775.4	175632	1.56799	0.126682	1.67677	0.745689	insig
MEDP2370	C10H19N5O5	Asp-Arg	Amino acid and Its metabolites	Small Peptide	-	579151	72149.7	285262	436500	249799	82217.7	517803	358220	245493	611513	275766	1.15094e+06	1.56353	0.166854	1.85313	0.889964	insig
MEDP2597	C14H18N2O5	Glu-Phe	Amino acid and Its metabolites	Small Peptide	20556-22-3	5.99004e+06	1.68555e+06	5.81663e+06	5.05223e+06	6.29867e+06	1.52604e+06	8.89035e+06	4.39527e+06	4.39625e+06	8.43942e+06	4.87352e+06	8.08017e+06	1.56007	0.123885	1.48184	0.567393	insig
MEDP1667	C14H18N2O5	Phe-Glu	Amino acid and Its metabolites	Small Peptide	3617-45-6	5.99004e+06	1.68555e+06	5.81663e+06	5.05223e+06	6.29867e+06	1.52604e+06	8.89035e+06	4.39527e+06	4.39625e+06	8.43942e+06	4.87352e+06	8.08017e+06	1.56007	0.123885	1.48184	0.567393	insig
MEDP0535	C6H15O4P	Triethyl-phosphate	Organic acid And Its derivatives	Phosphoric acids	78-40-0	696995	701247	705079	741271	760205	698799	637258	713741	662604	739418	642698	676109	1.55945	0.0841931	0.946146	-0.0798659	insig
MW0150541	C23H41N5O8	Gly-Val-Val-Glu-Ile	Amino acid and Its metabolites	Small Peptide	-	1.58867e+06	2.87481e+06	47788.2	110398	291345	309822	816147	2.38758e+06	1.10271e+07	520691	1.343e+07	478929	1.5555	0.165987	5.48753	2.45616	up
MW0156854	C19H35N5O8	Ser-Lys-Val-Glu	Amino acid and Its metabolites	Small Peptide	-	822834	150222	635678	978582	847834	174976	1.01565e+06	561890	888664	706564	4.93153e+06	727063	1.55227	0.270755	2.44627	1.29059	up
MEDP1681	C14H27N3O4	Leu-Gly-Leu	Amino acid and Its metabolites	Small Peptide	19408-48-1	2.45874e+06	1.59035e+06	2.55812e+06	6.38985e+06	4.88657e+06	1.58482e+06	1.48977e+07	4.69948e+06	2.95708e+06	2.71825e+06	3.53058e+06	7.26403e+06	1.55068	0.223647	1.85259	0.889544	insig
MEDP0336	C22H46NO7P	LPC(0:0/14:0)	GP	LPC	20559-16-4	1.4538e+06	4.30558e+06	448384	107181	1.65277e+06	3.8748e+06	5.39532e+06	1.46398e+07	5.24667e+06	1.81731e+06	2.22942e+06	1.58159e+06	1.54576	0.186804	2.6101	1.3841	up
MW0145275	C21H34N10O8	Arg-Asn-His-Glu	Amino acid and Its metabolites	Small Peptide	-	187079	118808	723774	545139	795279	242859	884677	1.52307e+06	441632	554064	252355	884482	1.54352	0.178149	1.73761	0.797108	insig
MEDN2085	C18H26N2O4	Proglumide	Amino acid and Its metabolites	Amino acid derivatives	6620-60-6	143458	66835.5	102528	135671	197994	37401.9	157266	192459	167341	155034	100674	162130	1.54317	0.156199	1.36704	0.451058	insig
MEDP1126	C8H11NO	(R)-(-)-2-phenylglycine	Amino acid and Its metabolites	Amino acid derivatives	56613-80-0	1.34309e+07	6.13055e+06	6.42634e+06	8.27305e+06	7.00862e+06	4.6013e+06	1.10702e+07	8.34645e+06	8.09421e+06	9.39017e+06	1.48801e+07	8.93398e+06	1.54279	0.161877	1.32361	0.404478	insig
MEDP1003	C8H11NO	1-Hydroxylamino-2-phenylethane	Benzene and substituted derivatives	Benzene and substituted derivatives	3217-93-4	1.34309e+07	6.13055e+06	6.42634e+06	8.27305e+06	7.00862e+06	4.6013e+06	1.10702e+07	8.34645e+06	8.09421e+06	9.39017e+06	1.48801e+07	8.93398e+06	1.54279	0.161877	1.32361	0.404478	insig
MEDP2562	C8H14N2O6	Ser-Glu	Amino acid and Its metabolites	Small Peptide	6403-16-3	1.33745e+06	289222	794065	1.15512e+06	751407	424879	1.02151e+06	827752	893794	1.11113e+06	1.11537e+06	1.85888e+06	1.53562	0.154081	1.43692	0.522981	insig
MW0106475	C36H72O4S2Sn	Dioctyltin isooctylthioglycolate	Heterocyclic compounds	Heterocyclic compounds	-	1.51291e+06	135668	224546	3.23693e+06	6.05076e+06	1.84225e+06	4.10078e+06	6.01355e+06	4.33546e+06	3.82784e+06	649933	4.258e+06	1.53491	0.17422	1.78308	0.834374	insig
MEDP1871	C11H22N2O3S1	Ile-Met	Amino acid and Its metabolites	Small Peptide	42384-14-5	212128	724131	30052.8	792275	554925	487785	763503	587781	964718	436325	886612	1.58683e+06	1.53487	0.0772393	1.86548	0.899549	insig
MEDN0767	C18H32O3	12,13-EpOME	FA	Oxidized lipids	-	87408.4	23479.4	455254	146508	118465	21347.5	48963.3	13982.3	32480.9	37930.2	28022.5	48786	1.53239	0.16561	0.246539	-2.02011	down
MEDN0783	C18H32O3	9,10-EpOME	FA	Oxidized lipids	-	87408.4	23479.4	455254	146508	118465	21347.5	48963.3	13982.3	32480.9	37930.2	28022.5	48786	1.53239	0.16561	0.246539	-2.02011	down
MEDP0173	C21H27N7O14P2	Nicotinic Acid Adenine Dinucleotide	Nucleotide And Its metabolites	Nucleotide And Its metabolites	53-84-9	79423.9	63317.2	154197	84849.9	127122	80636.2	166364	172770	62272.1	119486	137562	139930	1.53197	0.138494	1.35424	0.437478	insig
MEDN1426	C18H34O5	9(S),12(S),13(S)-TriHOME	FA	Oxidized lipids	97134-11-7	427766	467964	260911	290898	226335	166849	252365	169778	280305	218133	204491	223525	1.53142	0.154706	0.732645	-0.448814	insig
MEDP2579	C10H19N3O5	Asp-Lys	Amino acid and Its metabolites	Small Peptide	5891-51-0	1.94899e+06	610748	1.63561e+06	1.75874e+06	1.70614e+06	1.03598e+06	1.78546e+06	2.39512e+06	1.8474e+06	1.6218e+06	1.32434e+06	3.03495e+06	1.5249	0.123608	1.38095	0.465665	insig
MEDP2580	C10H19N3O5	Lys-Asp	Amino acid and Its metabolites	Small Peptide	20556-18-7	1.94899e+06	610748	1.63561e+06	1.75874e+06	1.70614e+06	1.03598e+06	1.78546e+06	2.39512e+06	1.8474e+06	1.6218e+06	1.32434e+06	3.03495e+06	1.5249	0.123608	1.38095	0.465665	insig
MW0009050	C12H19N2O2+	Neostigmine	Benzene and substituted derivatives	Benzene and substituted derivatives	59-99-4	714115	5.06643e+06	3.43675e+06	2.62324e+06	5.88551e+06	5.61407e+06	2.7014e+06	891769	2.30589e+06	1.21941e+06	725494	2.42529e+06	1.51961	0.0460186	0.439984	-1.18448	down
MEDP1013	C8H14N2O5S	γ-Glu-Cys	Amino acid and Its metabolites	Small Peptide	636-58-8	189376	195650	199061	263733	324667	324809	301454	443935	500409	203220	210950	621419	1.51928	0.123869	1.52367	0.607551	insig
MW0062073	C22H30O4	Piperoic acid	Terpenoids	Sesquiterpenoids	-	767586	104549	542435	828895	2.77678e+06	857666	1.85843e+06	1.73046e+06	998116	1.56323e+06	645789	1.41479e+06	1.51695	0.385952	1.39689	0.482221	insig
MEDP2598	C14H20N2O3S	Met-Phe	Amino acid and Its metabolites	Small Peptide	14492-14-9	94169.2	291532	12557	515394	225555	242434	428491	317128	433313	177441	520896	598410	1.51564	0.0805029	1.79184	0.841441	insig
MEDP0054	C5H10N2O3	L-Glutamine	Amino acid and Its metabolites	Amino acids	56-85-9	1.25907e+08	5.34314e+07	4.24118e+07	4.71321e+07	5.2684e+07	4.5672e+07	7.18172e+07	6.14545e+07	1.03331e+08	6.15091e+07	8.88234e+07	1.27562e+08	1.51029	0.177811	1.40099	0.486447	insig
MEDN0848	C10H11NO	Indole 3-Ethanol	Benzene and substituted derivatives	Benzene and substituted derivatives	526-55-6	14369.9	39883.5	11904.9	25889	19163.6	37044.3	15212	67407	32112.6	23691.2	75010.1	88830.9	1.50719	0.0994765	2.03881	1.02773	up
MW0007242	C17H26O4	Gingerol	Benzene and substituted derivatives	Phenolics	-	718291	4.09809e+06	656791	3.66542e+06	1.39984e+06	1.65179e+06	666989	1.37102e+06	1.1734e+06	694575	835663	941017	1.50666	0.136162	0.466165	-1.10109	down
MW0011128	C27H48O3	(3alpha,5alpha,22R,23R)-Cholestane-3,22,23-triol	Alcohol and amines	Alcohols	-	279127	210689	143165	198639	168468	181944	193802	262154	456766	276285	182291	307274	1.50649	0.106492	1.42007	0.505966	insig
MEDP1508	C14H20N2O3S	Phe-Met	Amino acid and Its metabolites	Small Peptide	15080-84-9	173892	458395	28402	492902	288375	322073	592479	409823	599757	235961	570863	617172	1.50459	0.0505101	1.71541	0.778556	insig
MEDN1991	C11H22N2O3	Ile-Val	Amino acid and Its metabolites	Small Peptide	41017-96-3	1.24987e+06	465458	888287	1.02532e+06	865119	923180	1.36378e+06	925407	1.13327e+06	1.38351e+06	759569	2.77587e+06	1.50333	0.167936	1.53979	0.622735	insig
MEDP0526	C7H9N5	6-Dimethylaminopurine	Nucleotide And Its metabolites	Nucleotide And Its metabolites	938-55-6	1.68555e+06	1.80981e+06	2.61645e+06	1.95447e+06	2.95571e+06	2.12228e+06	3.82441e+06	2.99791e+06	2.53104e+06	2.75775e+06	1.9692e+06	2.03941e+06	1.49811	0.184685	1.22637	0.294393	insig
MW0124781	C14H13N3O4S2	Meloxicam	Heterocyclic compounds	Heterocyclic compounds	133687-22-6	19366.9	12931.3	17553.6	13950.9	14031.1	1974.83	29471	13913.5	15274.4	31285.4	35847.8	13244.3	1.49534	0.0739789	1.74212	0.800847	insig
MW0145811	C16H30N4O5	Asn-Leu-Leu	Amino acid and Its metabolites	Small Peptide	-	1.62033e+06	2.20461e+06	1.88897e+06	2.37265e+06	2.99766e+06	1.58049e+06	3.87129e+06	3.09968e+06	5.06969e+06	1.16809e+06	2.34049e+06	7.14788e+06	1.49383	0.11273	1.79216	0.841696	insig
MW0158969	C20H35N5O8	Val-Gln-Ile-Asp	Amino acid and Its metabolites	Small Peptide	-	67871.7	82778.5	30910.6	145636	211374	86343.8	195816	803820	1.13045e+06	88155.3	33194.7	458953	1.49151	0.109837	4.33722	2.11677	up
MW0130875	C10H10O2	2-Methoxycinnamaldehyde	Aldehyde,Ketones,Esters	Aldehydes	1504-74-1	9.51849e+06	1.22647e+07	7.07679e+06	9.16761e+06	9.87222e+06	1.17147e+07	1.05047e+07	1.12332e+07	1.1355e+07	1.08887e+07	1.23665e+07	1.16229e+07	1.49146	0.134232	1.14018	0.189256	insig
MEDN0245	C9H17NO5	Pantothenate	CoEnzyme and vitamins	CoEnzyme and vitamins	79-83-4	7.29712e+06	1.64075e+07	3.60889e+06	7.72447e+06	7.56243e+06	8.35405e+06	7.50996e+06	2.5371e+07	1.34196e+07	7.84253e+06	1.33927e+07	1.38893e+07	1.49128	0.143275	1.598	0.676263	insig
MEDP2351	C9H16N2O6	Thr-Glu	Amino acid and Its metabolites	Small Peptide	54532-73-9	2.69513e+06	932353	2.10014e+06	3.4145e+06	1.94751e+06	1.0517e+06	2.08912e+06	2.5459e+06	2.56221e+06	2.39047e+06	2.72888e+06	4.20858e+06	1.49112	0.171208	1.36107	0.444737	insig
MEDP2223	C8H16N2O4	Cork-oximate	Organic acid And Its derivatives	Organic acid And Its derivatives	38937-66-5	319017	470439	224119	317621	233275	345164	357678	336999	388049	379797	443496	444789	1.48928	0.112192	1.23102	0.29986	insig
MEDP1686	C20H42NO7P	LPE(15:0/0:0)	GP	LPC	-	4.04831e+06	2.67129e+06	4.95978e+06	5.63543e+06	5.77358e+06	1.79306e+06	7.09976e+06	3.24328e+06	5.49376e+06	5.4792e+06	2.17322e+07	4.57688e+06	1.48484	0.240403	1.91408	0.936652	insig
MW0107522	C17H34N4O4	Ile-Val-Lys	Amino acid and Its metabolites	Small Peptide	-	931525	316348	774798	774365	1.21784e+06	483009	1.77736e+06	1.3174e+06	767076	503835	796183	2.0176e+06	1.48265	0.15208	1.59619	0.674629	insig
MW0156668	C17H32N8O8	Ser-Asn-Thr-Arg	Amino acid and Its metabolites	Small Peptide	-	31246.7	22335.8	1.12502e+06	1.35462e+06	216477	61300.1	330068	4.6782e+06	339500	1.5634e+06	88530.9	1.30891e+06	1.48225	0.262606	2.95574	1.56352	up
MEDP2643	C11H8ClNO2	Quinmerac	Benzene and substituted derivatives	Benzene and substituted derivatives	90717-03-6	3.80121e+06	2.88562e+06	2.7801e+06	3.33771e+06	2.53005e+06	2.20342e+06	3.40388e+06	2.9453e+06	2.82768e+06	4.01051e+06	4.45579e+06	3.47929e+06	1.48152	0.114583	1.20437	0.268283	insig
MEDP1898	C7H8N2O2	3-Hydroxyphenylurea	Benzene and substituted derivatives	Benzene and substituted derivatives	701-82-6	125203	134167	154670	154954	160650	138483	141677	113250	134309	117705	128522	144781	1.47616	0.0879139	0.898765	-0.153985	insig
MEDN0669	C20H30O3	5-oxoETE	FA	Oxidized lipids	106154-18-1	468516	54169.1	156343	332361	882700	111886	457389	1.11049e+06	1.51621e+06	780266	87370.1	605883	1.47505	0.11411	2.27202	1.18397	up
MEDP1857	C22H45NO2	Eicosanoyl-EA	Organic acid And Its derivatives	Organic acid And Its derivatives	94421-69-9	1.59209e+07	2.8046e+07	894661	1.32671e+07	2.38359e+07	1.47122e+07	3.026e+07	2.4406e+07	4.0449e+07	1.83103e+07	2.53327e+07	2.56585e+07	1.47369	0.0453522	1.70068	0.766113	insig
MW0013108	C14H20O4	2,3-Dimethoxy-5-methyl-6-(3-methylbut-2-enyl)benzene-1,4-diol	Benzene and substituted derivatives	Benzene and substituted derivatives	-	21708.5	45629.6	344935	176112	217195	160558	502249	427851	100396	364184	111866	196740	1.47141	0.181608	1.76299	0.818021	insig
MW0007543	C18H22N2O	Malonoben	Benzene and substituted derivatives	Benzene and substituted derivatives	10537-47-0	6.39247e+06	2.82715e+07	9.52054e+06	1.16083e+07	2.28881e+07	3.13613e+07	1.77111e+07	3.30909e+07	3.00745e+07	2.60581e+07	2.64043e+07	1.79315e+07	1.47082	0.20644	1.37466	0.459074	insig
MEDP1907	C18H35NO	(E,Z)-2-Amino-3,14-octadecadien-1-ol	Alcohol and amines	Alcohols	158507-68-7	3.7333e+06	5.23283e+06	2.90701e+06	3.10637e+06	6.7064e+06	1.04241e+07	6.40568e+06	3.20369e+06	1.06575e+07	7.1416e+06	1.1559e+07	1.02023e+07	1.46989	0.135553	1.53129	0.614749	insig
MEDP0574	C18H35NO	Oleamide	Alcohol and amines	Amines	301-02-0	3.7333e+06	5.23283e+06	2.90701e+06	3.10637e+06	6.7064e+06	1.04241e+07	6.40568e+06	3.20369e+06	1.06575e+07	7.1416e+06	1.1559e+07	1.02023e+07	1.46989	0.135553	1.53129	0.614749	insig
MW0010949	C27H44O3	(23R)-23,25-dihydroxyvitamin D3 /(23R)-23,25-dihydroxycholecalciferol	CoEnzyme and vitamins	CoEnzyme and vitamins	-	258735	803226	470282	102936	117450	805400	638639	805831	427740	580455	623920	809683	1.46446	0.167943	1.51924	0.603353	insig
MEDP0593	C5H5N5S	Thioguanine	Nucleotide And Its metabolites	Nucleotide And Its metabolites	154-42-7	599980	329043	294417	501009	474640	400905	641468	616414	644412	510676	303002	811494	1.46427	0.098141	1.35672	0.440124	insig
MEDP1318	C30H54NO7P	LPC(0:0/22:4)	GP	LPC	-	349229	312884	8469.16	88577.8	188769	408191	544551	3.53422e+06	643157	95776.4	634122	216686	1.46304	0.231517	4.17995	2.06349	up
MEDP1319	C30H54NO7P	LPC(22:4/0:0)	GP	LPC	-	349229	312884	8469.16	88577.8	188769	408191	544551	3.53422e+06	643157	95776.4	634122	216686	1.46304	0.231517	4.17995	2.06349	up
MEDP0224	C6H12O6	D-Fructose	Carbohydrates and Its metabolites	Sugars	57-48-7	4.19734e+07	9.54266e+07	2.39421e+07	3.73892e+07	6.28199e+07	9.16808e+07	7.43553e+07	8.45174e+07	2.47367e+08	4.4064e+07	6.94453e+07	1.36829e+08	1.46066	0.1678	1.85877	0.894351	insig
MEDP0049	C4H8N2O3	L-Asparagine Anhydrous	Amino acid and Its metabolites	Amino acids	70-47-3	144014	248263	220477	390798	271611	227607	331252	308546	382720	155854	456526	646828	1.45994	0.124266	1.51835	0.602502	insig
MEDN1326	C6H10O4	2-Methylglutaric Acid	Organic acid And Its derivatives	Organic acid And Its derivatives	18069-17-5	273689	181187	280034	369561	447758	266676	379835	2.64445e+06	397843	317186	202146	968064	1.45766	0.235346	2.69917	1.43251	up
MEDP0011	C6H14N2O2	L-Lysine	Amino acid and Its metabolites	Amino acids	56-87-1	144219220	5.60434e+07	4.51431e+07	5.08755e+07	5.87975e+07	5.37429e+07	7.47468e+07	7.00872e+07	1.09314e+08	6.55553e+07	1.09125e+08	1.30284e+08	1.45725	0.215098	1.36762	0.451665	insig
MEDN0385	C12H24O2	FFA(12:0)	FA	FFA	143-07-7	602543	2.66815e+06	1.04034e+06	1.11642e+06	2.47599e+06	3.26043e+06	1.74537e+06	4.17671e+06	3.50451e+06	2.41091e+06	2.15534e+06	1.9849e+06	1.45721	0.203705	1.4312	0.517225	insig
MW0112039	C14H25NO11	Galbeta1,3GlcNAc	Carbohydrates and Its metabolites	Sugar derivatives	489-52-1	1.68052e+06	115776	105568	351064	320141	1.78276e+06	973052	2.59145e+06	1.84839e+06	180629	4.6378e+06	988580	1.45447	0.15607	2.57584	1.36504	up
MW0124192	C14H21NO3	Furmecyclox	Heterocyclic compounds	Heterocyclic compounds	60568-05-0	455835	502555	379709	477584	524928	562665	578523	460200	524344	579638	769561	473297	1.45444	0.166095	1.16612	0.221713	insig
MW0152043	C31H24O12	Kolaflavanone	Aldehyde,Ketones,Esters	Ketones	68705-66-8	216349	43293.8	156652	103227	84060	38827.3	172429	113433	57007	467622	159218	290148	1.45385	0.165994	1.96115	0.971699	insig
MEDP1695	C24H50NO6P	LPC(O-16:1/0:0)	GP	LPC O	97802-53-4	2.86662e+06	566986	197087	617819	271237	164837	735525	6.30663e+06	4.11147e+06	317952	1.54e+06	911435	1.44626	0.190047	2.97209	1.57148	up
MEDN2150	C12H18O11	2-O-α-D-glucopyranosyl-L-ascorbic acid	Carbohydrates and Its metabolites	Sugar derivatives	129499-78-1	108949	250788	52957.8	104058	151673	206587	166283	138790	278412	146414	332897	224960	1.44402	0.146981	1.4717	0.557484	insig
MEDN1955	C6H8O7	D-Saccharic Acid 1,4-lactone (hydrate)	Carbohydrates and Its metabolites	Sugars	61278-30-6	414158	99407.9	248835	184877	216153	79251.5	127336	122404	143977	149947	77673.3	87963.5	1.44385	0.134412	0.570782	-0.808989	insig
MW0137518	C19H16O4	Bisdesmethoxycurcumin	Heterocyclic compounds	Heterocyclic compounds	-	141414	12168.7	112387	42894.9	81140.5	16090.1	290700	68863.9	93081.4	69671.3	190066	45802.7	1.44362	0.223677	1.86701	0.900733	insig
MEDP1448	C21H42O4	MG(18:0/0:0/0:0)	GL	MG	-	1.06698e+06	2.48744e+07	3.79052e+06	2.79397e+06	5.07948e+06	1.45485e+07	2.2145e+06	4.82344e+06	2.41179e+06	2.41009e+06	1.94294e+06	1.36707e+06	1.44258	0.163851	0.290867	-1.78157	down
MEDP1748	C6H10N6	Cyromazine	Heterocyclic compounds	Heterocyclic compounds	66215-27-8	178884	112297	146148	151743	185211	167783	247966	342030	107974	259295	440576	114614	1.44225	0.132992	1.60547	0.682993	insig
MEDP0013	C3H7NO2	L-Alanine	Amino acid and Its metabolites	Amino acids	56-41-7	4.28817e+07	4.52455e+07	2.7214e+07	4.86448e+07	3.96718e+07	4.01639e+07	4.77053e+07	6.89817e+07	3.21043e+07	3.72105e+07	7.6939e+07	6.54742e+07	1.44184	0.12671	1.34695	0.429693	insig
MEDP1005	C3H7NO2	β-Alanine	Amino acid and Its metabolites	Amino acids	107-95-9	4.28817e+07	4.52455e+07	2.7214e+07	4.86448e+07	3.96718e+07	4.01639e+07	4.77053e+07	6.89817e+07	3.21043e+07	3.72105e+07	7.6939e+07	6.54742e+07	1.44184	0.12671	1.34695	0.429693	insig
MEDN1620	C10H18N2O5	Glu-Val	Amino acid and Its metabolites	Small Peptide	5879-06-1	1.17222e+06	175725	120793	228178	140127	83638.2	441350	462864	294325	364120	942375	264173	1.44182	0.497824	1.44178	0.527854	insig
MW0013120	C18H30O5	2,3-Dinor-8-isoprostaglandin-F2alpha	Hormones and hormone related compounds	Hormones and hormone related compounds	240405-20-3	339367	1.58773e+06	201472	1.83944e+06	462490	572003	270997	500054	309575	243436	376683	433890	1.43959	0.155013	0.426713	-1.22866	down
MW0016355	C22H30O4	Canrenoic acid	Organic acid And Its derivatives	Organic acid And Its derivatives	4138-96-9	589178	2.78568e+07	1.68274e+06	1.58472e+06	3.43018e+06	1.5948e+07	1.01105e+06	2.93949e+06	1.51643e+06	1.22346e+06	1.16096e+06	889483	1.43566	0.179389	0.171082	-2.54724	down
MEDP1882	C15H22N2O3	Phe-Leu	Amino acid and Its metabolites	Small Peptide	3303-55-7	337225	114718	12005.7	96715.5	138298	334066	423203	5.12076e+06	20278.4	571265	221963	441458	1.29863	0.28473	6.58155	2.71843	up
MEDN1910	C8H14N2O3S	Cys-Pro	Amino acid and Its metabolites	Small Peptide	-	934128	2.66013e+06	424823	700970	1.29747e+06	2.72261e+06	1.2426e+06	1.73745e+06	5.2776e+06	1.20281e+06	2.85112e+06	3.5057e+06	1.43357	0.159914	1.80973	0.855775	insig
MW0156799	C15H29N3O5	Ser-Ile-Leu	Amino acid and Its metabolites	Small Peptide	-	3.32425e+06	1.64284e+06	3.85841e+06	6.51858e+06	5.1719e+06	1.54198e+06	7.69366e+06	4.7725e+06	1.20515e+07	2.04805e+06	3.55186e+06	1.13987e+07	1.43303	0.127241	1.88215	0.912379	insig
MEDP1792	C5H11NO2	N-methyl-4-aminobutyric acid	Amino acid and Its metabolites	Amino acid derivatives	1119-48-8	184865	17776.1	74795.2	286573	61805.5	97561.5	549632	68122.8	465049	105494	116761	449603	1.43283	0.121494	2.42565	1.27837	up
MEDN1922	C9H15N3O6	Asn-Glu	Amino acid and Its metabolites	Small Peptide	20917-58-2	213057	57910.5	124947	208521	182634	91605.8	146512	186556	114531	242465	201302	379850	1.4311	0.192445	1.44674	0.532808	insig
MW0161563	C10H8N2O	2-(1H-indol-3-yl)acetonitrile oxide	Heterocyclic compounds	Indole and Its derivatives	-	62962.2	86955.5	336819	266489	211694	1.51221e+06	113958	72145.9	149578	193691	58831	72621.7	1.43017	0.235308	0.266771	-1.90633	down
MEDN1597	C21H44NO6P	Phosphatidylethanolamine lyso alkenyl 16:0	GP	LPE	-	116175	4210.8	36443.8	27813.8	3230.35	11208.4	42309.7	148362	59168	15554.6	75643.3	41055.4	1.42983	0.262313	1.91927	0.940561	insig
MW0109820	C7H9NO4	Tetrahydrodipicolinate	Organic acid And Its derivatives	Organic acid And Its derivatives	-	4.21643e+07	3.40761e+07	3.94039e+07	3.72541e+07	3.65822e+07	3.16452e+07	3.98854e+07	3.59394e+07	3.9924e+07	4.22942e+07	4.4766e+07	3.77273e+07	1.42373	0.136805	1.08778	0.121387	insig
MW0158899	C21H39N7O7	Val-Arg-Ile-Asp	Amino acid and Its metabolites	Small Peptide	-	1.45775e+06	3.84331e+06	1.84062e+06	4.32197e+06	2.45863e+06	1.10889e+06	2.208e+06	1.37186e+06	1.08809e+06	2.5217e+06	800605	1.15427e+06	1.42255	0.144867	0.608371	-0.716978	insig
MEDP2601	C11H21N5O5	Glu-Arg	Amino acid and Its metabolites	Small Peptide	7219-59-2	426771	160916	432205	506193	539898	178685	592291	446901	790669	330945	304304	969796	1.42211	0.156416	1.53025	0.613768	insig
MW0137835	C20H16O6	Cycloartocarpesin	Heterocyclic compounds	Heterocyclic compounds	-	879077	1.53513e+06	1.076e+06	1.5107e+06	1.5249e+06	223729	1.55776e+06	1.28274e+06	1.26085e+06	1.62268e+06	1.97483e+06	1.63672e+06	1.4203	0.110757	1.38314	0.467949	insig
MEDN1554	C2H6O4S	Isethionic acid	Organic acid And Its derivatives	Sulfonic acids	1562-00-1	328779	315149	471695	541558	375587	426643	1.18089e+07	561564	1.70089e+06	269365	390747	550915	1.32244	0.303558	6.21383	2.63548	up
MW0151309	C18H31N5O8	Ile-Ala-Gln-Asp	Amino acid and Its metabolites	Small Peptide	-	1.53058e+06	223022	888891	2.67388e+06	3.42808e+06	1.71811e+06	2.41766e+06	3.6519e+06	1.31365e+06	2.63806e+06	1.73142e+06	2.73419e+06	1.41926	0.278725	1.38464	0.46951	insig
MEDP2024	C6H6O6	Dehydroascorbic acid	Organic acid And Its derivatives	Organic acid And Its derivatives	490-83-5	256540	324939	241089	305339	396110	365124	268083	274139	369562	158221	141347	277044	1.41617	0.150856	0.787869	-0.343972	insig
MEDN0771	C20H30O3	15-oxoETE	FA	Oxidized lipids	81416-72-0	1.45591e+06	409894	250747	1.40112e+06	2.64297e+06	556756	924273	5.24346e+06	7.80624e+06	2.10263e+06	414774	1.9437e+06	1.41565	0.16243	2.74438	1.45648	up
MEDP0876	C8H13NO6	O-Succinyl-L-Homoserine	Amino acid and Its metabolites	Amino acid derivatives	1492-23-5	76956.8	44661.1	79725.3	63573.9	65765.3	79592	74168.7	88339.7	74067.5	68225	72363.4	108693	1.41473	0.161071	1.18422	0.243942	insig
MW0002287	C6H4N2O5	2,4-Dinitrophenol	Benzene and substituted derivatives	Phenolics	51-28-5	349147	245802	241691	254151	189295	177487	263726	254713	244501	327521	369090	311365	1.41442	0.134162	1.21498	0.280928	insig
MEDP0321	C5H6N2O4	L-Dihydroorotic Acid	Organic acid And Its derivatives	Organic acid And Its derivatives	5988-19-2	3.6761e+07	7.45172e+07	2.13486e+07	2.30199e+07	5.18778e+07	6.71538e+07	4.41132e+07	6.83342e+07	1.36109e+08	3.7436e+07	5.65176e+07	9.99696e+07	1.41111	0.156196	1.6109	0.687867	insig
MEDP2373	C10H19N3O4S	Met-Gln	Amino acid and Its metabolites	Small Peptide	36261-62-8	290272	200519	313365	519145	405283	302370	359352	527415	480926	314680	301982	784124	1.40946	0.194081	1.36314	0.446936	insig
MW0013917	C27H44O8	3-alpha,20-alpha-Dihydroxy-5-beta-pregnane 3-glucuronide	Hormones and hormone related compounds	Hormones and hormone related compounds	-	62407.4	148124	97183.5	514745	396524	298655	328274	47312.4	160103	52978.6	12417.7	103126	1.4092	0.157406	0.464018	-1.10775	down
MW0165717	C21H32O4	(1E,3S,4S,10R,11S)-9,14-dihydroxy-14-(methoxymethyl)-4,10-dimethyl-6-propan-2-yltricyclo[9.3.0.03,7]tetradeca-1,6-dien-5-one	Aldehyde,Ketones,Esters	Ketones	-	2.02496e+06	2.8523e+06	3.23881e+06	1.1802e+07	3.4352e+06	1.70784e+06	1.95315e+06	3.02588e+06	2.57588e+06	1.22128e+06	1.7452e+06	2.16929e+06	1.40862	0.243619	0.506388	-0.981684	insig
MEDP2525	C4H11NO2	2-Amino-2-methyl-1,3-propanediol	Alcohol and amines	Alcohols	115-69-5	1.64891e+06	1.93033e+06	1.74056e+06	1.95946e+06	1.86028e+06	2.43467e+06	1.16458e+06	2.3758e+06	2.25046e+06	751455	631366	1.89636e+06	1.40602	0.252396	0.78364	-0.351736	insig
MW0168518	C9H7NO	2-hydroxyquinoline	Aldehyde,Ketones,Esters	Ketones	59-31-4	866694	594607	1.09719e+06	800817	990097	1.40067e+06	645378	854840	486764	568732	533472	1.17339e+06	1.40562	0.141279	0.741308	-0.431855	insig
MEDN2173	C6H10O3	4-Acetylbutyric acid	Organic acid And Its derivatives	Organic acid And Its derivatives	3128-06-1	154058	107925	201148	98364	550531	212550	2.64945e+06	622737	167021	201484	354024	128697	1.40172	0.298949	3.11301	1.63831	up
MEDP1083	C5H4N4O2	Oxypurinol	Nucleotide And Its metabolites	Nucleotide And Its metabolites	2465-59-0	7.79619e+07	6.63308e+07	1.12421e+08	9.0956e+07	7.49595e+07	1.48609e+08	1.18684e+08	1.43813e+08	9.96447e+07	1.2706e+08	1.37207e+08	8.03963e+07	1.4002	0.187253	1.23732	0.307219	insig
MEDP2406	C6H7N5	6-Methylaminopurine	Nucleotide And Its metabolites	Nucleotide And Its metabolites	443-72-1	361765	409146	558391	343513	468239	398664	757534	1.00676e+06	269402	386043	790031	515080	1.39999	0.146676	1.46664	0.552514	insig
MEDN0750	C20H30O3	(±)12-HEPE	FA	Oxidized lipids	81187-21-5	1.84027e+07	2.39595e+06	7.53945e+06	2.37329e+07	3.64316e+07	6.06388e+06	2.90346e+07	3.83384e+07	2.41927e+07	2.57701e+07	5.93475e+06	2.5384e+07	1.39963	0.217038	1.57196	0.652561	insig
MEDN0752	C20H30O3	(±)15-HEPE	FA	Oxidized lipids	88852-33-9	1.84027e+07	2.39595e+06	7.53945e+06	2.37329e+07	3.64316e+07	6.06388e+06	2.90346e+07	3.83384e+07	2.41927e+07	2.57701e+07	5.93475e+06	2.5384e+07	1.39963	0.217038	1.57196	0.652561	insig
MEDN0756	C20H30O3	(±)18-HEPE	FA	Oxidized lipids	141110-17-0	1.84027e+07	2.39595e+06	7.53945e+06	2.37329e+07	3.64316e+07	6.06388e+06	2.90346e+07	3.83384e+07	2.41927e+07	2.57701e+07	5.93475e+06	2.5384e+07	1.39963	0.217038	1.57196	0.652561	insig
MW0052931	C24H33FO6	Flurandrenolide	Heterocyclic compounds	Heterocyclic compounds	1524-88-5	607504	926549	433544	1.01297e+06	1.63846e+06	1.38567e+06	891631	2.4244e+06	1.89158e+06	1.93276e+06	812324	1.00466e+06	1.39864	0.174085	1.49172	0.57698	insig
MW0014024	C30H48O4	3-Epicorosolic acid	Organic acid And Its derivatives	Organic acid And Its derivatives	52213-27-1	3916.31	322801	65073.1	3719.37	534481	1.44242e+06	433773	679209	123982	267743	339757	463330	1.39704	0.965509	0.972765	-0.0398371	insig
MW0007290	C18H19ClN2O2	Halofenozide	Benzene and substituted derivatives	Benzene and substituted derivatives	112226-61-6	419600	423323	246985	495049	337459	378256	623388	393400	881791	626976	631457	258694	1.39684	0.0947738	1.48466	0.570128	insig
MW0015049	C14H26O3	6-Ketomyristic acid	Hormones and hormone related compounds	Hormones and hormone related compounds	-	22657.8	149965	78947.1	32289.6	60608.7	47549.2	42584.5	131811	120206	63975	239101	79944.2	1.39667	0.200418	1.72855	0.789562	insig
MEDP1472	C7H8N2O2	N'-Methyl-2-pyridone-5-carboxamide	Heterocyclic compounds	Pteridines and derivatives	701-44-0	3.56212e+06	3.41439e+06	5.34805e+06	4.97078e+06	3.82401e+06	7.99652e+06	6.67918e+06	7.33223e+06	4.99011e+06	6.41032e+06	8.67732e+06	3.72772e+06	1.39457	0.17857	1.29884	0.377225	insig
MEDP2600	C15H18N4O3	Phe-His	Amino acid and Its metabolites	Small Peptide	16874-81-0	326405	463205	360893	424920	115433	262713	529429	539080	455227	350062	383220	494690	1.39389	0.056413	1.40855	0.494214	insig
MW0139075	C30H39NO3	N-(4-Methyl-2-oxochromen-7-yl)icosa-5,8,11,14-tetraenamide	Alcohol and amines	Amines	-	1.32695e+06	2.26664e+06	1.20338e+06	3.51062e+06	1.53631e+06	1.55654e+06	1.90433e+06	577188	1.2514e+06	1.43413e+06	1.37233e+06	1.36701e+06	1.39048	0.183408	0.693516	-0.527998	insig
MEDN1442	C22H32O3	8-HDoHE	FA	Oxidized lipids	90780-54-4	8.10463e+06	658072	6.21913e+06	8.11116e+06	1.67631e+07	8.45831e+06	1.31472e+07	1.36189e+07	1.27781e+07	1.02728e+07	5.72878e+06	1.28503e+07	1.39033	0.208238	1.41565	0.50146	insig
MW0052789	C20H24O2	Exemestane	Heterocyclic compounds	Heterocyclic compounds	107868-30-4	170323	501132	15166.1	530137	296004	290865	629522	356953	564603	211263	627096	715177	1.38665	0.0818203	1.72132	0.783513	insig
MEDP1692	C23H48NO7P	LPC(0:0/15:0)	GP	LPC	108273-89-8	5.77918e+06	1.82453e+06	267992	567650	632559	602308	1.51206e+06	4.62965e+06	1.20878e+07	669489	5.67617e+06	1.36621e+06	1.38637	0.206172	2.68149	1.42304	up
MEDP0494	C23H48NO7P	LPC(15:0/0:0)	GP	LPC	-	5.77918e+06	1.82453e+06	267992	567650	632559	602308	1.51206e+06	4.62965e+06	1.20878e+07	669489	5.67617e+06	1.36621e+06	1.38637	0.206172	2.68149	1.42304	up
MW0129705	C19H20O3	1,7-Bis(4-hydroxyphenyl)-4-hepten-3-one	Aldehyde,Ketones,Esters	Ketones	56973-65-0	128607	28193.4	191627	747337	88129.6	1.33812e+06	355972	20822.5	57630.1	66663.1	56753.5	55304.4	1.38618	0.198849	0.243118	-2.04027	down
MW0165720	C20H30O2	(1R,2E,7S,8R)-9-hydroxy-1,8-dimethyl-12-propan-2-yltricyclo[9.3.0.03,7]tetradeca-2,11-diene-4-carbaldehyde	Alcohol and amines	Alcohols	-	1.29833e+07	1.16948e+07	9.6262e+06	1.07818e+07	1.94993e+07	3.22662e+07	6.65408e+06	9.54086e+06	1.38867e+07	1.33771e+07	632711	1.09239e+07	1.3861	0.124409	0.568036	-0.815945	insig
MEDP1356	C13H20N2O8	Shinorine	Amino acid and Its metabolites	Amino acid derivatives	73112-73-9	679142	4.63274e+06	9	9	2.40031e+06	4.49726e+06	1.58828e+06	1.94858e+06	3.42572e+06	967015	1.41304e+06	4.48078e+06	1.383	0.801604	1.13219	0.179115	insig
MW0000445	C19H23NO4	Sinomenine	Alkaloids	Isoquinoline alkaloids	115-53-7	325523	147651	117083	341549	270880	75316.1	1.15978e+06	203165	73385.7	535628	2.73281e+06	229715	1.38052	0.20197	3.86109	1.94901	up
MEDN1145	C9H10ClNO2	P-chlorophenylalanine	Benzene and substituted derivatives	Phenolic acids	7424-00-2	4.72056e+06	3.85557e+06	3.19241e+06	3.95055e+06	2.81743e+06	2.72181e+06	3.69659e+06	3.62483e+06	3.61946e+06	4.92244e+06	5.22757e+06	4.40653e+06	1.37926	0.13018	1.19941	0.262323	insig
MEDP1728	C4H4N2O2	4-Carboxypyrazole	Organic acid And Its derivatives	Organic acid And Its derivatives	37718-11-9	76273.8	34862.2	48402.2	46499.2	46846	49267.7	43955.1	35387.1	43780.2	38752.3	47830.1	40171.3	1.37702	0.189566	0.826991	-0.274057	insig
MEDP0453	C8H7N	Indole	Heterocyclic compounds	Indole and Its derivatives	120-72-9	1.20089e+07	1.02305e+07	1.03411e+07	1.10284e+07	9.64855e+06	8.84658e+06	1.14809e+07	1.02663e+07	1.03015e+07	1.20041e+07	1.39244e+07	1.0875e+07	1.3744	0.14977	1.10866	0.148814	insig
MW0110146	C22H33N7O4	Trp-Val-Arg	Amino acid and Its metabolites	Small Peptide	-	1.12502e+06	1.65132e+06	1.29293e+06	1.32797e+06	1.53037e+06	1.83708e+06	871266	1.23536e+06	1.37654e+06	1.23339e+06	1.28235e+06	1.4628e+06	1.3687	0.140824	0.851337	-0.232198	insig
MEDN1928	C8H13N3O6	Asn-Asp	Amino acid and Its metabolites	Small Peptide	-	168205	26643.9	115758	117237	174972	157035	134320	204605	147735	173019	105783	345727	1.368	0.194079	1.46238	0.548315	insig
MEDP2535	C4H9NO4S	(2s)-2-Amino-4-sulfinobutanoic acid	Amino acid and Its metabolites	Amino acid derivatives	2686-70-6	1.13305e+06	347740	493784	752952	679994	379131	904044	925283	746133	804334	469464	1.16617e+06	1.36733	0.210389	1.3245	0.40545	insig
MEDP2545	C8H17N3O3	Lys-Gly	Amino acid and Its metabolites	Small Peptide	7563-03-3	1.20639e+07	2.03733e+07	1.85045e+07	1.50009e+07	1.27314e+07	1.76649e+07	8.7174e+06	1.48822e+07	2.94515e+07	4.03153e+06	4.03481e+06	1.52882e+07	1.36664	0.451687	0.793092	-0.33444	insig
MW0110277	C15H23N5O4	Tyrosyl-Arginine	Amino acid and Its metabolites	Small Peptide	70904-56-2	474062	1.12022e+07	5.04109e+06	935269	1.41577e+07	3.0005e+07	1.49474e+07	1.75863e+07	5.33723e+06	1.1745e+07	1.26673e+07	1.19525e+07	1.3656	0.68241	1.20093	0.264146	insig
MEDN0760	C20H32O3	(±)5-HETE	FA	Oxidized lipids	70608-72-9	1.786e+06	238778	909325	1.35338e+06	2.98348e+06	658762	1.61028e+06	3.06586e+06	3.90894e+06	1.81555e+06	692283	1.57665e+06	1.36492	0.232451	1.59773	0.676023	insig
MEDN0763	C20H32O3	(±)9-HETE	FA	Oxidized lipids	79495-85-5	1.786e+06	238778	909325	1.35338e+06	2.98348e+06	658762	1.61028e+06	3.06586e+06	3.90894e+06	1.81555e+06	692283	1.57665e+06	1.36492	0.232451	1.59773	0.676023	insig
MEDP2459	C12H26N4O3	Lys-Lys	Amino acid and Its metabolites	Small Peptide	13184-13-9	153800	563817	479274	375294	459115	535818	495724	575938	711520	488070	420506	583792	1.36043	0.144423	1.27596	0.351587	insig
MEDP0627	C6H5NO2	Isonicotinic acid	Organic acid And Its derivatives	Organic acid And Its derivatives	55-22-1	6.75471e+07	1.86594e+08	7.00039e+07	1.41538e+08	1.22327e+08	1.27946e+08	147154621	1.6905e+08	1.43155e+08	1.19175e+08	1.42065e+08	1.50033e+08	1.36019	0.234279	1.21604	0.282193	insig
MEDP0881	C5H15NO4P	Phosphocholine	Nucleotide And Its metabolites	Nucleotide And Its metabolites	107-73-3	3.08824e+07	3.2911e+07	2.98592e+07	3.85642e+07	3.90334e+07	4.64781e+07	2.3009e+07	4.0397e+07	4.6406e+07	9.95718e+06	9.37139e+06	3.72984e+07	1.35956	0.265002	0.764435	-0.387534	insig
MW0145452	C16H32N6O4S2	Arg-Met-Met	Amino acid and Its metabolites	Small Peptide	-	1.83488e+06	5.16325e+06	975472	1.54795e+06	1.92156e+06	2.81e+06	1.91452e+06	3.63294e+06	3.19009e+06	2.71336e+06	5.94999e+06	3.01538e+06	1.3569	0.242867	1.43241	0.518443	insig
MEDP0155	C5H7N3O	5-Methylcytosine	Nucleotide And Its metabolites	Nucleotide And Its metabolites	554-01-8	396827	681151	201788	292166	480489	370055	1.78033e+06	727123	603791	253042	374949	658140	1.35686	0.206443	1.81524	0.860159	insig
MW0052938	C19H26O3	Formestane	Aldehyde,Ketones,Esters	Ketones	566-48-3	1.76837e+06	71022.1	1.46608e+06	1.38075e+06	2.18406e+06	177800	2.4218e+06	2.16774e+06	2.65842e+06	2.06776e+06	434507	1.69358e+06	1.35658	0.156388	1.62368	0.699265	insig
MEDP2452	C12H24N2O3	Ile-Ile	Amino acid and Its metabolites	Small Peptide	42537-99-5	4.2546e+07	1.05191e+07	3.65951e+07	4.652e+07	3.88932e+07	1.38977e+07	3.86567e+07	2.85403e+07	7.48713e+07	4.68414e+07	2.22361e+07	1.21783e+08	1.35573	0.190775	1.7618	0.817049	insig
MEDN1011	C6H14O6	D-Mannitol	Carbohydrates and Its metabolites	Sugar alcohols	69-65-8	34427.6	70733.8	101990	75931.2	98312.4	79461.4	80966.7	230843	148410	65808.9	54800.9	170521	1.35435	0.156962	1.63034	0.70517	insig
MEDN0213	C6H14O6	D-Sorbitol	Carbohydrates and Its metabolites	Sugar alcohols	50-70-4	34427.6	70733.8	101990	75931.2	98312.4	79461.4	80966.7	230843	148410	65808.9	54800.9	170521	1.35435	0.156962	1.63034	0.70517	insig
MEDN0120	C6H14O6	Dulcitol	Carbohydrates and Its metabolites	Sugar alcohols	608-66-2	34427.6	70733.8	101990	75931.2	98312.4	79461.4	80966.7	230843	148410	65808.9	54800.9	170521	1.35435	0.156962	1.63034	0.70517	insig
MEDN1925	C8H14N2O5	Ala-Glu	Amino acid and Its metabolites	Small Peptide	13187-90-1	1.91609e+06	732549	769893	1.74489e+06	1.97305e+06	1.22217e+06	1.21787e+06	3.1566e+06	2.30471e+06	1.56781e+06	953267	6.08414e+06	1.35411	0.206224	1.82857	0.870719	insig
MW0156323	C22H33NO4	R-4-benzyl-3-((R)-3-hydroxy-2,2-dimethyloctanoyl)-5,5-dimethyloxazolidin-2-one	Benzene and substituted derivatives	Benzene and substituted derivatives	-	1.04178e+06	508475	794870	1.22521e+06	762059	740059	1.35149e+06	505660	2.0129e+06	741505	2.00751e+06	1.66953e+06	1.35227	0.101214	1.63404	0.708443	insig
MEDP2442	C11H22N2O3S	Leu-Met	Amino acid and Its metabolites	Small Peptide	36077-39-1	462326	1.66227e+06	31530.3	2.4011e+06	518349	1.47728e+06	1.12308e+06	1.08635e+06	1.92112e+06	1.1702e+06	2.3717e+06	3.80693e+06	1.35079	0.180042	1.75181	0.808848	insig
MW0125198	C9H17NOS	Molinate	Heterocyclic compounds	Heterocyclic compounds	2212-67-1	1.31007e+06	1.79656e+06	734767	1.52515e+06	1.16057e+06	1.34116e+06	1.40458e+06	1.35327e+06	1.3766e+06	1.57582e+06	2.37738e+06	1.75381e+06	1.35064	0.159835	1.25078	0.322823	insig
MEDP2587	C14H18N2O4	Phe-Hyp	Amino acid and Its metabolites	Amino acid derivatives	90965-82-5	273927	170498	194392	226025	169853	145554	273360	195335	191188	212201	283428	243138	1.34657	0.176572	1.18504	0.244942	insig
MEDN1183	C11H14O4	Multifidol	Benzene and substituted derivatives	Phenolics	125074-06-8	892917	916641	883929	735860	567187	283880	1.37928e+06	670148	442710	1.54435e+06	2.3073e+06	912182	1.34582	0.142026	1.69516	0.761419	insig
MW0150145	C25H46N6O9S	Glu-Ser-Leu-Met-Lys	Amino acid and Its metabolites	Small Peptide	-	696387	2.81506e+06	905292	1.75384e+06	1.07363e+06	2.39155e+06	689600	1.2249e+06	2.45946e+06	404182	1.22745e+06	344885	1.34227	0.276917	0.659054	-0.601531	insig
MW0108081	C23H36N6O4	Lys-Trp-Lys	Amino acid and Its metabolites	Small Peptide	-	143241	1.03836e+06	165047	241262	388729	443055	279422	283258	192681	160117	113736	184690	1.34048	0.20317	0.501675	-0.995174	insig
MEDP0367	C4H9NO2	γ-Aminobutyric Acid	Amino acid and Its metabolites	Amino acid derivatives	56-12-2	216394	278298	213837	674465	835323	456160	508382	1.40752e+06	1.00116e+06	408180	233035	917772	1.33577	0.187307	1.67361	0.742967	insig
MEDP1491	C2H8ClN3	Methylguanidine	Alcohol and amines	Amines	21770-81-0	1.01589e+06	1.56259e+06	906124	1.48242e+06	1.04589e+06	1.28962e+06	1.3988e+06	1.34777e+06	1.08724e+06	1.29071e+06	3.08263e+06	1.65546e+06	1.33577	0.224403	1.35058	0.433575	insig
MEDP0518	C7H14ClNO2	DL-Stachydrine	Organic acid And Its derivatives	Organic acid And Its derivatives	4136-37-2	1.67092e+07	1.82934e+07	1.8391e+07	2.21369e+07	2.17652e+07	2.84002e+07	1.29798e+07	2.37781e+07	2.78454e+07	5.79399e+06	6.22454e+06	2.04835e+07	1.33294	0.289528	0.772542	-0.372315	insig
MW0137366	C38H22O6	Anigorootin	Benzene and substituted derivatives	Benzene and substituted derivatives	-	143588	412356	325571	361376	471298	38861.5	633730	303093	379732	248550	282793	1.12285e+06	1.33244	0.226379	1.69461	0.760957	insig
MEDN0593	C4H6O5	D-Malic acid	Organic acid And Its derivatives	Organic acid And Its derivatives	636-61-3	836589	388658	444463	572129	401123	176168	539638	506087	198859	174096	164437	269043	1.33212	0.188754	0.656997	-0.606042	insig
MW0015566	C15H24O4	Acoric acid	Organic acid And Its derivatives	Organic acid And Its derivatives	-	286287	68483.8	128721	98964.3	85566.4	29230.9	66891.2	163402	1.07994e+06	393258	66427.1	441046	1.33124	0.171918	3.17096	1.66492	up
MW0145954	C15H28N4O5	Asn-Val-Leu	Amino acid and Its metabolites	Small Peptide	-	923773	609796	1.09737e+06	1.92974e+06	2.48193e+06	618200	3.2217e+06	1.60201e+06	1.93712e+06	740766	1.05969e+06	3.19329e+06	1.33096	0.230337	1.53438	0.617653	insig
MEDN0555	C9H10O4	Hydroxyphenyllactic acid	Organic acid And Its derivatives	Organic acid And Its derivatives	306-23-0	29205.5	99961	204000	86442.3	88440	68594.7	120927	88846.1	104903	136772	203035	104107	1.32924	0.324823	1.31553	0.395641	insig
MEDP2318	C9H19N3O4	Lys-Ser	Amino acid and Its metabolites	Small Peptide	6665-19-6	1.34579e+06	675281	802790	1.07496e+06	1.17584e+06	782571	1.25506e+06	1.44373e+06	2.49638e+06	775175	716024	3.5574e+06	1.32772	0.171658	1.74891	0.806456	insig
MW0145924	C23H34N8O9	Asn-Tyr-Arg-Asp	Amino acid and Its metabolites	Small Peptide	-	35334.7	29918.3	29590.5	6232.97	20380.6	46495.6	32050	77698	13400.5	38436.5	45123.7	115885	1.32748	0.157876	1.92074	0.941665	insig
MW0124240	C21H24O2	Gestrinone	Aldehyde,Ketones,Esters	Ketones	16320-04-0	437879	72521.7	130543	123805	356571	99274.6	184648	357622	2.03873e+06	445116	102290	285215	1.32682	0.279842	2.79669	1.48372	up
MW0004340	C25H27N5	4-(5H-Dibenzo[a,d]cyclohepten-5-ylidene)-1-[4-(2H-tetrazol-5-yl)butyl]-piperidine	Benzene and substituted derivatives	Benzene and substituted derivatives	162640-98-4	31459.2	379511	1.71278e+06	68539.3	9.61397e+06	1.95699e+06	9.31021e+06	5.63596e+06	1.08328e+06	1.68338e+06	271046	1.63416e+06	1.32502	0.647844	1.42539	0.511361	insig
MEDP2338	C8H15N3O5	Ser-Gln	Amino acid and Its metabolites	Small Peptide	94421-66-6	251507	142145	196081	292505	229469	182721	265058	295644	953727	157142	177883	1.11245e+06	1.32476	0.170284	2.28819	1.19421	up
MEDP0305	C4H7N3O	Creatinine	Organic acid And Its derivatives	Organic acid And Its derivatives	60-27-5	199708	112948	152142	131241	251160	175842	164168	165875	288605	135294	360327	252834	1.32305	0.20155	1.33631	0.418258	insig
MEDP1715	C13H16N2O3	2-Hydroxymelatonin	Hormones and hormone related compounds	Hormones and hormone related compounds	229018-17-1	20415.1	58665.4	67682.5	84796.3	78175.1	117500	94550	138929	74428.6	51550.7	120277	96298.6	1.32294	0.204251	1.34829	0.431127	insig
MW0107283	C15H26N8O4	His-Ala-Arg	Amino acid and Its metabolites	Small Peptide	-	4.66233e+06	441119	3.88036e+06	4.83519e+07	3.23136e+06	645314	1.71047e+06	1.59147e+06	2.09171e+06	3.64482e+06	65775.6	827188	1.1379	0.315887	0.162246	-2.62375	down
FDATN01519	C9H11NO2	D-Phenylalanine	Amino acid and Its metabolites	Amino acids	673-06-3	3.83545e+07	2.04761e+07	2.38192e+07	2.69147e+07	2.14945e+07	1.61246e+07	3.42608e+07	2.46925e+07	2.37782e+07	3.12491e+07	4.45101e+07	2.52034e+07	1.32098	0.207497	1.24806	0.319688	insig
MW0115115	C20H30O10	Phenethyl rutinoside	Benzene and substituted derivatives	Benzene and substituted derivatives	-	5.42101e+06	3.53903e+06	1.81243e+06	6.74431e+06	4.41477e+06	3.934e+06	8.18545e+06	4.9951e+06	1.10483e+07	6.1955e+06	2.41216e+06	8.16204e+06	1.31956	0.109974	1.58506	0.664541	insig
MW0110451	C8H16N2O4	Valyl-Serine	Amino acid and Its metabolites	Small Peptide	13588-94-8	1.81726e+06	1.19933e+06	1.52772e+06	2.95533e+06	2.98551e+06	1.30045e+06	2.5391e+06	2.50408e+06	6.34781e+06	1.87964e+06	1.18565e+06	6.95101e+06	1.31954	0.177351	1.81639	0.861077	insig
MEDP0434	C25H52NO7P	LPC(17:0/0:0)	GP	LPC	50930-23-9	1.18811e+08	6.1312e+07	7.55508e+07	1.09271e+08	9.39426e+07	6.54576e+07	8.81007e+07	8.21022e+07	1.08021e+08	9.92935e+07	1.20697e+08	1.20502e+08	1.31918	0.213363	1.17998	0.23876	insig
MEDP0125	C5H14NO+	Choline	Tryptamines,Cholines,Pigments	Cholines	62-49-7	1.79809e+06	1.35476e+06	1.04834e+06	1.23914e+06	1.12971e+06	1.11474e+06	1.07896e+06	991303	1.01628e+06	992074	1.20425e+06	1.40608e+06	1.31677	0.2396	0.870417	-0.200221	insig
MEDN0051	C5H11NO3S	Methionine Sulfoxide	Amino acid and Its metabolites	Amino acid derivatives	62697-73-8	769045	321065	194030	636931	499467	446488	399341	874829	656941	610459	414371	1.25376e+06	1.31548	0.188496	1.46831	0.554161	insig
MEDN1236	C15H21N5O13P2	Cyclic ADP ribose	Nucleotide And Its metabolites	Nucleotide And Its metabolites	119340-53-3	22168.1	17633.7	43819.5	30517	48165.8	27399.3	46617.5	43826.8	22872.7	59746.9	27972.5	39252	1.31471	0.277319	1.26665	0.34102	insig
MW0153103	C20H32N4O4S1	Lys-Phe-Met	Amino acid and Its metabolites	Small Peptide	-	1.2466e+07	1.03116e+06	1.07733e+07	2.40648e+07	1.08912e+07	275307	4.29962e+06	1.31885e+06	326466	4.95244e+06	123773	1.56791e+06	1.31452	0.0800774	0.211575	-2.24076	down
MEDP1506	C11H22N2O3	Leu-Val	Amino acid and Its metabolites	Small Peptide	13588-95-9	2.57376e+07	1.45901e+07	2.81088e+07	3.1506e+07	3.78516e+07	1.30702e+07	3.10029e+07	2.7501e+07	3.27154e+07	3.15577e+07	1.88998e+07	6.8062e+07	1.31331	0.253968	1.39025	0.475342	insig
MEDN2065	C7H5NO4	2,4-Pyridinedicarboxylic acid	Heterocyclic compounds	Pyridine and pyridine derivatives	499-80-9	33461.1	36821.2	9	44323.2	9	32546.1	48664.7	53877.6	48900.2	56749.1	36774.7	38819.6	1.3122	0.0343869	1.92829	0.947323	insig
MEDN1957	C7H5NO4	Pyridine-3,4-dicarboxylic acid	Heterocyclic compounds	Pyridine and pyridine derivatives	490-11-9	33461.1	36821.2	9	44323.2	9	32546.1	48664.7	53877.6	48900.2	56749.1	36774.7	38819.6	1.3122	0.0343869	1.92829	0.947323	insig
MW0145751	C24H45N9O7	Asn-Gly-Arg-Ile-Leu	Amino acid and Its metabolites	Small Peptide	-	976075	1.03695e+07	727523	1.00868e+07	7.69671e+06	4.61219e+06	1.16162e+07	507013	2.43602e+06	550272	123043	2.02515e+06	1.31168	0.279918	0.500676	-0.998052	insig
MW0138976	C21H22O6	Mollicellin I	Benzene and substituted derivatives	Benzene and substituted derivatives	-	2.89488e+06	735625	2.04674e+06	4.23549e+06	1.45027e+06	993559	1.54444e+06	1.3362e+06	1.41015e+06	1.82747e+06	230136	650701	1.31092	0.175054	0.566428	-0.820037	insig
MEDN1987	C14H20N2O4	Tyr-Val	Amino acid and Its metabolites	Small Peptide	17355-09-8	90107.1	26474.9	81812.9	69730.1	71588.6	26098.1	100674	68602.8	104245	74411	40283.2	135609	1.31028	0.16867	1.43195	0.517984	insig
MEDN0539	C23H39NO19	3'-Sialyllactose	Carbohydrates and Its metabolites	Sugars	35890-38-1	31742.4	87927.2	17041.6	25640.8	35586.8	58460.5	45335.5	51503.6	101037	34738.3	53155.5	90142.2	1.30976	0.219514	1.46612	0.552005	insig
MEDN1947	C23H39NO19	6'-Sialyllactose	Carbohydrates and Its metabolites	Sugars	157574-76-0	31742.4	87927.2	17041.6	25640.8	35586.8	58460.5	45335.5	51503.6	101037	34738.3	53155.5	90142.2	1.30976	0.219514	1.46612	0.552005	insig
MW0015169	C24H36O4	7alpha-hydroxy-3-oxochol-4-en-24-oic Acid	Organic acid And Its derivatives	Organic acid And Its derivatives	-	1.30748e+07	2.10508e+07	4.41174e+06	2.32805e+07	1.30336e+07	4.58613e+06	3.03286e+07	1.1913e+07	1.23924e+07	2.44832e+07	7.10887e+07	8.82783e+06	1.30557	0.234998	2.002	1.00144	up
MEDN1098	C6H12O3	2-ethyl-2-hydroxybutyric acid	Organic acid And Its derivatives	Organic acid And Its derivatives	3639-21-2	1.90217e+06	6.72165e+06	2.27621e+06	1.59319e+06	2.08832e+07	9.83248e+06	6.61933e+07	3.45352e+07	5.11237e+06	3.02355e+06	2.1192e+07	2.38809e+06	1.30523	0.213963	3.06521	1.61599	up
MW0103666	C10H14N2O5	Telbivudine	Nucleotide And Its metabolites	Nucleotide and Its metabolites	-	359084	134701	127686	218485	190820	256579	159302	441871	246489	164047	498215	495763	1.30499	0.151263	1.55799	0.639688	insig
MW0014408	C28H44O2	4alpha-formyl-5alpha-cholesta-8,24-dien-3beta-ol	Alcohol and amines	Alcohols	-	6.57103e+06	154000	7.97326e+06	5.00381e+06	2.54737e+06	20916.9	728199	171059	10425.1	1.83952e+06	18400.2	313353	1.30495	0.0656963	0.138343	-2.85368	down
MEDP2431	C11H14N2O3	Phe-Gly	Amino acid and Its metabolites	Small Peptide	721-90-4	1.79664e+07	4.91301e+06	1.07134e+07	1.4305e+07	1.51469e+07	3.70982e+06	1.95629e+07	1.24106e+07	1.1095e+07	1.56255e+07	8.98358e+06	2.20241e+07	1.30429	0.251433	1.34376	0.426271	insig
MW0117097	C26H34O7	1H-Pyrano[3',4'	Heterocyclic compounds	Heterocyclic compounds	-	157920	221192	264204	363807	343298	370738	396149	407670	1.00667e+06	218474	192822	978146	1.30387	0.163969	1.85917	0.894662	insig
MEDP0115	C7H8N2O2	1,4-Dihydro-1-Methyl-4-Oxo-3-Pyridinecarboxamide	Heterocyclic compounds	Pteridines and derivatives	769-49-3	8.17258e+07	7.14835e+07	1.2395e+08	1.02468e+08	8.05833e+07	1.59335e+08	1.21128e+08	1.46896e+08	110295346	1.36681e+08	1.4713e+08	86449945	1.30382	0.230251	1.20827	0.272949	insig
MEDL01811	C15H16O3	Batatasin IV	Others	Others	60347-67-3	26245.6	9	6863.17	17512.5	11091.7	4771.49	18528.7	14671	20044.9	12997.9	13124	22863.1	1.30216	0.202309	1.53744	0.620527	insig
MW0151444	C20H32N6O7	Ile-His-Ala-Glu	Amino acid and Its metabolites	Small Peptide	-	4.1276e+07	4.85112e+06	2.56723e+07	3.91411e+07	4.54451e+07	2.88442e+07	4.07685e+07	3.944e+07	3.79488e+07	4.51222e+07	3.54638e+07	3.60346e+07	1.30101	0.236022	1.26749	0.341979	insig
MW0006159	C14H19ClN4O2	Benzamide,N-[(1S)-1-(aminocarbonyl)-4-[(2-chloro-1-iminoethyl)amino]butyl]-	Benzene and substituted derivatives	Benzene and substituted derivatives	913723-61-2	50738	15066.8	894750	1.20038e+06	423385	466314	148345	26052	20542.5	34040.4	11873.4	31135.6	1.84962	0.0593022	0.089158	-3.48749	down
MW0141088	C15H16O3	1,2-Bis(4-hydroxyphenyl)-2-propanol	Heterocyclic compounds	Heterocyclic compounds	154928-56-0	468221	123496	137461	326711	76170.7	439374	183366	124246	113086	241409	79850.6	127955	1.29553	0.164068	0.553578	-0.853141	insig
MW0011760	C21H32O6	[6]-Gingerdiol 3,5-diacetate	Aldehyde,Ketones,Esters	Esters	-	396425	533886	1.37459e+06	1.57413e+06	1.64877e+06	487201	784115	775404	686764	501814	199670	319610	1.29428	0.124286	0.543205	-0.880431	insig
MEDN1045	C6H5N5O2	2-Amino-4,6-pteridinediol	Nucleotide And Its metabolites	Nucleotide And Its metabolites	119-44-8	18722.5	44408.3	20285.9	35529.6	44347.6	44437.8	32237.3	57537.4	38128.6	38143.1	48480.9	38182.4	1.29333	0.2595	1.21652	0.282759	insig
MEDN1737	C8H6O5	4-hydroxyisophthalic acid	Benzene and substituted derivatives	Phenolic acids	636-46-4	80392.6	51566.3	165585	111560	131611	74960.8	351583	163292	93579.7	143978	78157.8	101694	1.29139	0.278853	1.51424	0.598598	insig
MEDP1790	C8H16N2O3	Gly-Ile	Amino acid and Its metabolites	Small Peptide	19461-38-2	2.37014e+07	7.05628e+06	1.91317e+07	1.98308e+07	2.37598e+07	3.98955e+06	3.50488e+07	1.29256e+07	1.30429e+07	2.79185e+07	1.89996e+07	2.88567e+07	1.29091	0.229971	1.40344	0.488962	insig
MEDN1837	C15H24O2	2,6-Di-tert-butyl-4-(hydroxymethyl)phenol	Benzene and substituted derivatives	Benzene and substituted derivatives	88-26-6	53806.7	50509.3	60180.5	42410.4	53405.4	57136.3	36793.9	33371.1	37483.8	39676.8	64584.5	59705.4	1.2908	0.242388	0.85562	-0.224958	insig
MW0006787	C9H8Cl2O3	Dichlorprop	Benzene and substituted derivatives	Benzene and substituted derivatives	120-36-5	8.29403e+06	7.01622e+06	7.32106e+06	7.36516e+06	6.06574e+06	5.82494e+06	7.83168e+06	7.22988e+06	6.2492e+06	9.15477e+06	8.72366e+06	7.87577e+06	1.28925	0.158166	1.12361	0.168145	insig
MEDL02592	C18H16O5	4',5,7-Trimethoxyflavone	Flavonoids	Flavonoid	5631-70-9	301612	313641	282999	323673	399768	1.50818e+06	340378	555234	242424	199282	210059	160773	1.28863	0.296107	0.545756	-0.873671	insig
MW0112907	C17H20O9	3-O-Feruloylquinic acid	Organic acid And Its derivatives	Organic acid And Its derivatives	1899-29-2	118375	105440	86341.2	104826	89720.6	33347.6	162703	88390.6	88488.5	175260	236739	66853.2	1.28641	0.157886	1.52111	0.605125	insig
MEDN1529	C20H31N4O16P	Cytidine 5'-monophosphate-N-acetylneuraminic acid（CMP-NANA）	Nucleotide And Its metabolites	Nucleotide And Its metabolites	3063-71-6	448628	12330	122256	67665.8	90421.5	27093.8	497155	83990.6	108868	229802	199570	67557.5	1.28602	0.470855	1.5447	0.62733	insig
MEDP0246	C6H5NO2	Nicotinic Acid	CoEnzyme and vitamins	CoEnzyme and vitamins	59-67-6	2.13636e+07	8.54433e+07	2.12813e+07	6.63994e+07	5.34494e+07	6.20436e+07	6.48047e+07	1.3437e+08	7.01996e+07	4.73066e+07	5.78955e+07	5.53237e+07	1.28377	0.259453	1.38686	0.471822	insig
MW0103187	C20H26O4	Yucalexin P15	Terpenoids	Ditepenoids	-	534508	10576.5	303751	171618	666830	47952.9	392763	644750	1.95194e+06	762237	39550.1	512554	1.28291	0.183453	2.48024	1.31048	up
MEDN0005	C4H9NO3	L-Threonine	Amino acid and Its metabolites	Amino acids	72-19-5	2.05687e+06	3.79031e+06	2.17876e+06	2.63199e+06	2.94031e+06	2.82299e+06	2.16152e+06	3.47644e+06	2.93305e+06	2.84087e+06	6.59115e+06	3.9139e+06	1.28239	0.225679	1.33467	0.416484	insig
MEDN0350	C20H32O3	(±)15-HETE	FA	Oxidized lipids	54845-95-3	1.17102e+06	278500	582699	1.55196e+06	1.738e+06	402101	1.35132e+06	2.24653e+06	1.73991e+06	1.25077e+06	466108	1.23833e+06	1.28159	0.249129	1.44874	0.534796	insig
MW0139603	C23H22O6	Rotenone	Heterocyclic compounds	Heterocyclic compounds	83-79-4	870556	1.65566e+06	132041	114278	2.19685e+06	375952	205121	317573	220093	359943	109494	230657	1.28076	0.124959	0.269933	-1.88933	down
MW0012041	C20H36O3	11(S)-HEDE	FA	Oxidized lipids	-	2.45206e+06	5.73478e+06	6.00082e+06	4.67627e+06	8.71467e+06	1.61407e+07	4.47516e+06	1.04498e+07	1.74153e+06	2.05086e+06	2.9218e+06	3.39635e+06	1.28062	0.220016	0.572642	-0.804295	insig
MW0112738	C9H14O	3,6-Nonadienal	Aldehyde,Ketones,Esters	Aldehydes	-	1.67858e+06	4.35265e+06	856377	2.30939e+06	2.75594e+06	2.0815e+06	1.39179e+06	1.33866e+06	2.09418e+06	1.14075e+06	1.231e+06	1.99518e+06	1.27849	0.162184	0.65493	-0.610587	insig
MEDN0841	C4H8N2O3	3-Ureidopropionate	Organic acid And Its derivatives	Organic acid And Its derivatives	462-88-4	21581.6	107522	44250.9	59205.8	52848.2	86052.3	87218.2	111885	93584.2	58835	68304	63496.5	1.27723	0.24781	1.30114	0.379776	insig
MEDP1680	C16H31N3O5	Thr-Leu-Ile	Amino acid and Its metabolites	Small Peptide	-	3.52712e+06	1.3526e+06	8.30179e+06	5.37764e+06	5.58286e+06	1.32741e+06	8.9125e+06	4.77105e+06	4.00443e+06	4.10856e+06	3.71245e+06	8.43661e+06	1.27128	0.36003	1.3328	0.414459	insig
MEDP0071	C8H16N2O3	Gly-Leu	Amino acid and Its metabolites	Amino acid derivatives	869-19-2	3.70719e+07	1.15008e+07	2.80768e+07	3.24356e+07	3.90836e+07	5615516	5.73674e+07	2.06786e+07	2.09581e+07	4.35862e+07	2.73988e+07	4.56091e+07	1.27032	0.247164	1.40195	0.487439	insig
MEDP1973	C7H14NO2+	D-Proline-betaine	Amino acid and Its metabolites	Amino acid derivatives	1195-94-4	2.17451e+07	2.40566e+07	2.31038e+07	2.59224e+07	2.65319e+07	3.38446e+07	1.75503e+07	3.14994e+07	3.20986e+07	7.40012e+06	7.83414e+06	2.73265e+07	1.26939	0.327201	0.797073	-0.327217	insig
MEDP1802	C7H13NO2	Stachydrine	Organic acid And Its derivatives	Organic acid And Its derivatives	471-87-4	2.17451e+07	2.40566e+07	2.31038e+07	2.59224e+07	2.65319e+07	3.38446e+07	1.75503e+07	3.14994e+07	3.20986e+07	7.40012e+06	7.83414e+06	2.73265e+07	1.26939	0.327201	0.797073	-0.327217	insig
MW0105037	C10H20O3	3-Hydroxycapric acid	Organic acid And Its derivatives	Organic acid And Its derivatives	19526-23-9	347577	91303.8	226176	917409	866269	331845	943253	1.22843e+06	396908	507877	293655	509603	1.26753	0.389767	1.39529	0.480568	insig
MEDP2585	C12H20N4O3	Ile-His	Amino acid and Its metabolites	Small Peptide	97284-12-3	5.19044e+06	5.24766e+06	2.56444e+06	6.26692e+06	6.37819e+06	5.57795e+06	6.64494e+06	6.62189e+06	1.03634e+07	4.8472e+06	3.74174e+06	1.41347e+07	1.26618	0.180926	1.48448	0.569961	insig
MW0102994	C12H18O4	Tuberonic acid	FA	FFA	140631-27-2	60120.3	38934	53682.2	39111.2	1.26933e+06	3.70259e+06	261181	1.06442e+07	160909	371674	2.00648e+06	137550	1.26434	0.46539	2.63025	1.3952	up
MW0007235	C19H20O4	Gancaonin V	Benzene and substituted derivatives	Benzene and substituted derivatives	-	133891	330004	517321	1.26749e+06	613619	1.23341e+06	432643	157967	134573	532689	142338	521829	1.26288	0.126636	0.469279	-1.09148	down
MW0153146	C21H41N7O7	Lys-Thr-Gln-Lys	Amino acid and Its metabolites	Small Peptide	-	1.70188e+06	7.59826e+06	2.0798e+06	3.45434e+06	5.38816e+06	4.21136e+06	3.13105e+06	4.49956e+06	2.84532e+06	2.00499e+06	385308	1.96057e+06	1.25862	0.167326	0.606814	-0.720673	insig
MW0105743	C21H35N9O4	Arg-Phe-Arg	Amino acid and Its metabolites	Small Peptide	-	5.84322e+06	2.4834e+06	7.36723e+06	1.16104e+07	3.99231e+06	469770	2.34441e+06	1.43394e+06	864876	8.6149e+06	600704	988566	1.25796	0.198099	0.467393	-1.09729	down
MEDP2364	C6H9N3O	4-Amino-5-hydroxymethyl-2-methylpyrimidine	Heterocyclic compounds	Heterocyclic compounds	73-67-6	926209	458216	1.95804e+06	930561	354812	506161	260721	458279	179566	985814	709084	510394	1.25758	0.249444	0.604569	-0.726022	insig
MW0105275	C21H25ClN6O2	4-Piperidinecarboxamide,4-amino-N-[(1S)-1-(4-chlorophenyl)-3-hydroxypropyl]-1-(7H-pyrrolo[2,3-d]pyrimidin-4-yl)-	Alcohol and amines	Amines	1143532-39-1	2.79953e+07	2.4915e+06	1.42236e+07	4.10869e+07	4.32771e+07	1.79443e+07	4.35983e+07	3.091e+07	2.69206e+07	3.81406e+07	1.83076e+07	3.00923e+07	1.25695	0.386474	1.27854	0.354498	insig
MEDP1228	C11H19NO6	Heterodendrin	Others	Others	66465-22-3	315995	117940	214723	264360	179080	166631	449323	193532	557103	216107	181900	274195	1.25592	0.186092	1.48734	0.572736	insig
MEDN1282	C23H44NO7P	LPE(0:0/18:2)	GP	LPE	-	503083	94483.4	256626	188110	1.17746e+06	401135	2.06386e+06	991923	273721	341995	274140	526302	1.25342	0.374466	1.70627	0.770842	insig
MEDN1441	C22H32O3	10-HDoHE	FA	Oxidized lipids	90780-50-0	6.72955e+06	707866	3.69372e+06	1.09911e+07	1.59961e+07	8.39405e+06	1.23909e+07	1.38064e+07	9.39323e+06	9.95039e+06	4.3967e+06	1.05849e+07	1.2531	0.389722	1.30122	0.37986	insig
MEDN0658	C16H30O4	Hexadecanedioic acid	FA	FFA	505-54-4	572787	1.26195e+06	625637	938700	845318	550834	394644	843151	516829	423724	639274	869185	1.25235	0.219688	0.768849	-0.379227	insig
MW0153221	C25H44N8O10	Lys-Gln-Ala-Gly-Asp-Val	Amino acid and Its metabolites	Small Peptide	-	151710	613514	68787.3	396630	236695	111402	396660	243157	222496	349550	1.44688e+06	226553	1.25199	0.341373	1.8276	0.869948	insig
MW0149743	C17H32N4O5	Gln-Leu-Leu	Amino acid and Its metabolites	Small Peptide	-	541684	182008	722082	1.06898e+06	958073	291527	1.61717e+06	787636	796032	504446	437770	1.19348e+06	1.25188	0.287808	1.41765	0.5035	insig
MEDP0495	C26H50NO7P	LPC(0:0/18:2)	GP	LPC	-	6.20323e+06	2.17667e+07	610156	335025	4.78822e+06	1.10039e+07	2.01486e+07	1.70472e+07	1.82466e+07	2.51272e+06	1.42932e+07	4.12792e+06	1.24922	0.268514	1.70836	0.772616	insig
MEDP1341	C26H50NO7P	LPC(18:2/0:0)	GP	LPC	-	6.20323e+06	2.17667e+07	610156	335025	4.78822e+06	1.10039e+07	2.01486e+07	1.70472e+07	1.82466e+07	2.51272e+06	1.42932e+07	4.12792e+06	1.24922	0.268514	1.70836	0.772616	insig
MEDP2381	C8H16N2O3	Ala-Val	Amino acid and Its metabolites	Small Peptide	3303-45-5	1.65094e+06	2.28297e+06	3.94033e+06	6.48048e+06	8.4515e+06	3.79487e+06	7.42866e+06	5.69382e+06	9.13723e+06	4.12645e+06	1.99499e+06	1.50762e+07	1.24893	0.227054	1.63367	0.708116	insig
MEDP1881	C17H25N3O4	Phe-Ile-Gly	Amino acid and Its metabolites	Small Peptide	-	638791	240236	353434	597258	643245	489602	661183	1.19533e+06	522467	409351	365277	1.19462e+06	1.24752	0.214189	1.46772	0.553579	insig
MEDP1033	C7H6O	Benzaldehyde	Benzene and substituted derivatives	Benzene and substituted derivatives	100-52-7	2.18859e+07	1.13934e+07	12004879	1.31626e+07	1.18087e+07	8.12801e+06	1.78637e+07	13746232	1.20128e+07	1.62346e+07	2.22911e+07	1.3492e+07	1.24682	0.266237	1.22016	0.28707	insig
MEDP0006	C2H5NO2	L-Glycine	Amino acid and Its metabolites	Amino acids	56-40-6	814905	997061	620258	1.00296e+06	614564	628696	970508	688452	683538	1.03592e+06	2.45535e+06	1.00926e+06	1.24514	0.248567	1.46267	0.548603	insig
MW0152014	C25H42N4O19	KDN2-3Gal1-3GlcNAcSp	Heterocyclic compounds	Heterocyclic compounds	-	225420	33936.6	65597.5	137944	122207	2841.89	150043	41268	199953	113983	310385	158933	1.24219	0.221384	1.65757	0.729071	insig
MEDP0592	C18H37NO2	3-Dehydrosphinganine	SL	SM	16105-69-4	1.60277e+07	2.94822e+07	4.46845e+06	8.72673e+06	1.01452e+07	1.28468e+07	1.39745e+07	1.96533e+07	7.20555e+07	7.54313e+06	1.97182e+07	3.46517e+07	1.24194	0.20707	2.05144	1.03663	up
MEDP1051	C18H37NO2	Sphingosine	SL	SM	123-78-4	1.60277e+07	2.94822e+07	4.46845e+06	8.72673e+06	1.01452e+07	1.28468e+07	1.39745e+07	1.96533e+07	7.20555e+07	7.54313e+06	1.97182e+07	3.46517e+07	1.24194	0.20707	2.05144	1.03663	up
MEDN0759	C20H30O3	(±)5-HEPE	FA	Oxidized lipids	83952-40-3	9.88881e+06	1.04858e+06	5.73329e+06	1.0405e+07	1.75948e+07	3.07288e+06	1.09896e+07	1.92824e+07	1.5326e+07	1.20469e+07	2.94144e+06	1.036e+07	1.24131	0.270076	1.48599	0.571429	insig
ZINC5849312	C23H24O5	8-Desoxygartanin	Heterocyclic compounds	Heterocyclic compounds	33390-41-9	3.27316e+06	554635	1.84151e+06	4.50813e+06	1.08872e+06	1.58939e+06	1.51281e+06	1.34438e+06	696199	1.66314e+06	634070	1.05615e+06	1.24095	0.166655	0.537259	-0.896311	insig
MEDP1512	C14H20N2O3	Phe-Val	Amino acid and Its metabolites	Small Peptide	-	7.01905e+06	3.03582e+06	9.13799e+06	7.98881e+06	1.07704e+07	3.94802e+06	11496774	8.28227e+06	1.18088e+07	8.54081e+06	3.80024e+06	1.41867e+07	1.23888	0.190949	1.387	0.471972	insig
MW0055470	C20H38O2	Oleic acid ethyl ester	FA	Others	111-62-6	4.29698e+06	210772	2.25261e+06	3.4251e+06	450088	294959	269896	338897	616405	1.05234e+06	60160.8	1.26453e+06	1.2388	0.156364	0.329557	-1.6014	down
MEDP0101	C9H8O3	P-Coumaric Acid	Benzene and substituted derivatives	Phenolic acids	501-98-4	30194542	1.32673e+07	1.45706e+07	1.99687e+07	1.31923e+07	6.56594e+06	2.37563e+07	1.69313e+07	1.63744e+07	2.18997e+07	2.97552e+07	1.64711e+07	1.23558	0.277158	1.28057	0.356788	insig
MW0140500	C18H28O3	(9Z,15Z)-(13S)-12,13-Epoxyoctadeca-9,11,15-trienoic acid	FA	Oxidized lipids	-	3.11624e+06	5.66195e+06	2.55518e+06	1.2835e+07	3.27383e+06	5.00053e+06	2.40172e+06	3.99429e+06	6.37433e+06	4.73824e+06	1.19551e+06	2.25678e+06	1.23398	0.307742	0.646087	-0.630199	insig
MW0048984	C18H28O3	Colnelenic acid	FA	Oxidized lipids	52591-16-9	3.11624e+06	5.66195e+06	2.55518e+06	1.2835e+07	3.27383e+06	5.00053e+06	2.40172e+06	3.99429e+06	6.37433e+06	4.73824e+06	1.19551e+06	2.25678e+06	1.23398	0.307742	0.646087	-0.630199	insig
MEDP0442	C8H20NO6P	Sn-Glycero-3-Phosphocholine	Tryptamines,Cholines,Pigments	Cholines	28319-77-9	414341	2.16322e+07	1.14874e+06	274767	5.29298e+06	1.83426e+07	8.20563e+06	1.36271e+07	7.43014e+06	4.5465e+06	5.82821e+06	5.45529e+06	1.23322	0.938219	0.957273	-0.0629981	insig
MEDP1904	C23H44NO7P	LPE(18:2/0:0)	GP	LPE	652149-09-2	1.42788e+06	531819	985618	941167	4.4101e+06	2.17314e+06	9.47845e+06	3.43706e+06	782968	1.84912e+06	1.36155e+06	1.98937e+06	1.23218	0.361819	1.80506	0.85205	insig
MEDN2006	C15H22N2O4	Tyr-Ile	Amino acid and Its metabolites	Small Peptide	40829-32-1	455926	133139	311286	309737	312627	67895.1	492952	252211	523867	295268	191424	516435	1.23108	0.204738	1.42848	0.514483	insig
MEDN2056	C6H14O6	L-Iditol	Carbohydrates and Its metabolites	Carbohydrates and Its metabolites	488-45-9	227817	200165	196805	231171	213809	238968	239507	215680	245780	244012	250124	202524	1.22871	0.191102	1.06792	0.0948062	insig
MEDP2378	C8H16N2O4	Ser-Val	Amino acid and Its metabolites	Small Peptide	51782-06-0	595488	1.29647e+06	2.47916e+06	3.13591e+06	3.5294e+06	1.428e+06	3.22063e+06	3.25555e+06	6.95816e+06	1.46422e+06	920822	8.89608e+06	1.22833	0.184406	1.98288	0.987598	insig
MEDP1718	C5H7N3O	2-O-Methylcytosine	Heterocyclic compounds	Heterocyclic compounds	3289-47-2	454737	162316	125465	185157	384968	178499	201263	642504	147827	282664	503977	391169	1.2269	0.263845	1.45486	0.54088	insig
MW0157871	C13H25N3O6	Thr-Val-Thr	Amino acid and Its metabolites	Small Peptide	-	2.30896e+06	832558	2.95268e+06	3.91137e+06	2.77899e+06	1.19294e+06	4.02903e+06	2.9444e+06	9.05173e+06	1.71857e+06	1.26294e+06	8.15831e+06	1.22608	0.174411	1.94348	0.958641	insig
MW0052616	C22H42O2	Erucic acid	FA	FFA	112-86-7	3.23629e+06	2.79559e+06	1.64117e+06	2.43644e+06	3.84093e+06	4.18719e+06	3.54603e+06	3.79394e+06	2.70664e+06	4.44045e+06	3.25266e+06	3.29758e+06	1.22513	0.312948	1.15987	0.213964	insig
MEDP2552	C8H16N2O5	Thr-Thr	Amino acid and Its metabolites	Small Peptide	-	1.90643e+06	771862	1.31613e+06	2.52973e+06	1.62807e+06	1.17091e+06	1.52703e+06	1.70395e+06	2.18694e+06	1.64708e+06	1.44582e+06	5.41772e+06	1.22462	0.296374	1.49398	0.579158	insig
MW0157065	C30H44O8	Simplexin	Terpenoids	Terpene	1404-62-2	222214	3.70142e+06	628332	551204	520518	1.40463e+06	259873	517000	561808	358690	681614	493892	1.22458	0.250298	0.408758	-1.29068	down
MEDP1691	C25H52NO7P	LPC(0:0/17:0)	GP	LPC	-	1.31298e+07	6.53682e+06	8.23055e+06	1.155e+07	9.98745e+06	7.09585e+06	9.58553e+06	8.42993e+06	1.09519e+07	1.10491e+07	1.2844e+07	1.29476e+07	1.22408	0.260141	1.16412	0.219236	insig
MW0145372	C23H41N13O6	Arg-His-Gln-Arg	Amino acid and Its metabolites	Small Peptide	-	100337	86980.2	59295.2	210797	1.58497e+06	58320.4	336746	418986	882860	191114	42604.7	1.55074e+06	1.22299	0.52781	1.62949	0.704416	insig
FDATN00061	C12H15N5O3	Entecavir Hydrate	Others	FDA	209216-23-9	538380	890802	425951	716275	1.0758e+06	1.6549e+06	1.19952e+06	1.37607e+06	1.7301e+06	650656	851259	1.0785e+06	1.22273	0.2969	1.29875	0.37712	insig
MW0152369	C16H29N3O6	Leu-Ile-Asp	Amino acid and Its metabolites	Small Peptide	-	2.19667e+06	498869	2.53944e+06	2.42773e+06	2.11308e+06	560043	4.37182e+06	2.60752e+06	771184	2.75632e+06	2.00921e+06	2.50807e+06	1.2217	0.231168	1.4536	0.539626	insig
MEDP0089	C7H11N3O	N-Acetylhistamine	Alcohol and amines	Amines	673-49-4	1.56988e+06	1.364e+06	2.06516e+06	2.03341e+06	1.42087e+06	3.77608e+06	2.81185e+06	2.95615e+06	2.11912e+06	2.56825e+06	3.3652e+06	1.49173e+06	1.22153	0.289923	1.25209	0.324338	insig
MEDP2302	C7H13NO3S	N-Acetyl-L-methionine	Amino acid and Its metabolites	Amino acid derivatives	65-82-7	4368	180193	5283.72	34675.2	12641.4	64414.4	50839.7	69971.7	38434.3	15634.5	823918	49281.6	1.22135	0.388951	3.47535	1.79716	up
MW0102796	C11H18N2O2S	Thiopental	Heterocyclic compounds	Heterocyclic compounds	76-75-5	108296	601606	97542.8	457143	326428	239493	569815	316989	716589	287984	638567	190602	1.21905	0.243673	1.48622	0.571651	insig
MW0145566	C21H39N7O7	Arg-Val-Leu-Asp	Amino acid and Its metabolites	Small Peptide	-	2.84251e+06	1.10792e+07	4.29734e+06	9.55278e+06	7.83281e+06	2.86315e+06	7.7264e+06	4.03806e+06	2.83213e+06	4.40955e+06	959246	3.45862e+06	1.21607	0.180434	0.608926	-0.715662	insig
MW0016202	C16H22O4	bis(3-methylbut-2-en-1-yl)benzene-1,2,3,5-tetrol	Benzene and substituted derivatives	Benzene and substituted derivatives	-	233900	2.2206e+06	272012	335644	578206	1.9109e+06	271661	405198	745300	262405	357449	252024	1.21515	0.201883	0.413246	-1.27493	down
MEDN0604	C14H26O4	Tetradecanedioic acid	FA	FFA	821-38-5	255871	291445	579541	316648	532332	418509	276855	558996	180393	211829	202754	336215	1.21474	0.218218	0.738006	-0.438295	insig
MEDP1675	C14H27N3O4	Leu-Leu-Gly	Amino acid and Its metabolites	Small Peptide	4464-36-2	1.67373e+06	590545	1.01768e+06	1.28122e+06	1.94e+06	553536	1.95152e+06	2.62832e+06	1.12674e+06	965082	790720	2.6379e+06	1.21388	0.250379	1.4313	0.517326	insig
MW0009955	C11H12O4	trans-3,5-Dimethoxy-4-hydroxycinnamaldehyde	Benzene and substituted derivatives	Phenolics	4206-58-0	1.0763e+06	3.89547e+06	5.70162e+06	7.19587e+06	4.37765e+06	6.43864e+06	2.87047e+06	3.18068e+06	3.66998e+06	2.21291e+06	1.70272e+06	3.0011e+06	1.21355	0.0767351	0.580008	-0.785854	insig
MEDN0373	C20H32O5	LipoxinA4	FA	Oxidized lipids	89663-86-5	1.30273e+06	536463	1.03099e+06	2.47771e+06	3.68763e+06	1.55571e+06	2.36639e+06	5.72628e+06	3.14971e+06	1.77684e+06	730504	2.79961e+06	1.21317	0.263195	1.56255	0.643901	insig
MEDN1686	C5H9NO4	L-threo-3-Methylaspartate	Amino acid and Its metabolites	Amino acid derivatives	6061-13-8	2.74475e+06	6.00223e+06	1.98008e+06	3.96147e+06	4.71166e+06	4.55857e+06	3.04722e+06	5.85227e+06	7.65355e+06	3.74238e+06	5.59433e+06	5.41307e+06	1.20931	0.200583	1.30653	0.38574	insig
MEDP1166	C26H52NO8P	PC(16:0/2:0)	GP	PC	-	6.39858e+06	2.31842e+07	607794	297297	5.09993e+06	1.18832e+07	2.12056e+07	1.75122e+07	1.87769e+07	2.6291e+06	1.14719e+07	4.43086e+06	1.20737	0.339336	1.60154	0.679458	insig
MEDP0859	C11H14N2O3	Gly-Phe	Amino acid and Its metabolites	Amino acid derivatives	3321-03-7	1.9286e+07	5.64646e+06	1.184e+07	1.61144e+07	1.54571e+07	4.27413e+06	1.98389e+07	1.26942e+07	1.16449e+07	1.66349e+07	9.78243e+06	2.32191e+07	1.20717	0.30318	1.29189	0.369479	insig
MW0139988	C18H22O8S	Zearalenone 4-sulfate	Others	Others	-	140598	214940	2.09723e+06	1.83144e+06	2.59277e+06	541253	2.31905e+06	1.79671e+06	2.52074e+06	1.33874e+06	922303	545459	1.20506	0.546203	1.27294	0.34817	insig
MEDP0357	C6H6N2O2	Urocanic Acid	Organic acid And Its derivatives	Organic acid And Its derivatives	104-98-3	7.23852e+06	4.91916e+07	5.37777e+06	1.48263e+07	1.75082e+07	4.23479e+07	2.4264e+07	5.74011e+07	2.70087e+07	1.41395e+07	2.87114e+07	3.46971e+07	1.20357	0.410272	1.36436	0.448223	insig
MW0129533	C15H12O3	1-(2-Hydroxyphenyl)-3-phenyl-1,3-propanedione	Aldehyde,Ketones,Esters	Ketones	1469-94-9	458587	70043.8	497132	332831	286186	48536.8	370745	600653	296360	569829	317926	177607	1.20088	0.323469	1.37784	0.462409	insig
MEDP2540	C7H10N4O3	5-Acetylamino-6-amino-3-methyluracil	Nucleotide And Its metabolites	Nucleotide and Its metabolites	19893-78-8	269778	277589	241141	281638	309167	417162	194296	213846	294494	156857	389417	263349	1.19826	0.291121	0.841793	-0.248463	insig
MEDP2542	C7H13N3O4	Gln-Gly	Amino acid and Its metabolites	Small Peptide	2650-65-9	1.18236e+07	1.33706e+07	1.20057e+07	1.52005e+07	1.50305e+07	1.70199e+07	9.20451e+06	1.42681e+07	2.09283e+07	4.1904e+06	4.65888e+06	1.66656e+07	1.19745	0.433448	0.827889	-0.272491	insig
MEDP1017	C4H9NO2	2-Aminoisobutyric Acid	Amino acid and Its metabolites	Amino acid derivatives	62-57-7	804879	704319	732166	2.2234e+06	2.41886e+06	1.26568e+06	1.39968e+06	4.3893e+06	3.17463e+06	1.17134e+06	628505	2.92285e+06	1.19598	0.206266	1.67944	0.747984	insig
MEDP1496	C4H9NO2	L-2-Aminobutyric acid	Organic acid And Its derivatives	Organic acid And Its derivatives	1492-24-6	804879	704319	732166	2.2234e+06	2.41886e+06	1.26568e+06	1.39968e+06	4.3893e+06	3.17463e+06	1.17134e+06	628505	2.92285e+06	1.19598	0.206266	1.67944	0.747984	insig
MEDP0061	C4H9NO2	N,N-Dimethylglycine	Amino acid and Its metabolites	Amino acid derivatives	1118-68-9	804879	704319	732166	2.2234e+06	2.41886e+06	1.26568e+06	1.39968e+06	4.3893e+06	3.17463e+06	1.17134e+06	628505	2.92285e+06	1.19598	0.206266	1.67944	0.747984	insig
MEDP1019	C4H9NO2	aminoisobutyric acid	Amino acid and Its metabolites	Amino acid derivatives	4249-19-8	804879	704319	732166	2.2234e+06	2.41886e+06	1.26568e+06	1.39968e+06	4.3893e+06	3.17463e+06	1.17134e+06	628505	2.92285e+06	1.19598	0.206266	1.67944	0.747984	insig
MEDP1860	C11H20N2O5	Glu-Leu	Amino acid and Its metabolites	Small Peptide	2566-39-4	6.90762e+06	1.06426e+06	1.31993e+06	1.79691e+06	886951	437692	3.41084e+06	2.34704e+06	1.06227e+06	2.56553e+06	7.71341e+06	1.75981e+06	1.19597	0.454924	1.51924	0.603351	insig
MW0104373	C11H18O4	2,2'-(3-methylcyclohexane-1,1-diyl)diacetic acid	Organic acid And Its derivatives	Organic acid And Its derivatives	-	109091	88669.7	122472	109575	119483	137270	72477.2	312869	119210	149245	549288	100681	1.19314	0.228579	1.89899	0.92523	insig
MW0163367	C17H20O2	(2E,4E,6E,8E,10E,12E)-2,6,11-trimethyltetradeca-2,4,6,8,10,12-hexaenedial	FA	Others	-	429278	30975.4	508896	1.34548e+06	430595	17686.2	195025	83002.6	18900.7	252327	11932.9	51954.9	1.19209	0.130848	0.221919	-2.17189	down
MEDP0789	C14H18O	2-Pentyl-3-phenyl-2-propenal	Aldehyde,Ketones,Esters	Aldehydes	122-40-7	565125	419959	660805	496244	478776	404291	441654	577105	532613	138615	345729	429772	1.19197	0.24678	0.814984	-0.295156	insig
MEDP2557	C10H18N2O4	Hyp-Val	Amino acid and Its metabolites	Small Peptide	-	50056.4	120694	32263	62993.5	130941	107669	99345.2	177920	131284	57590.6	74189.1	136793	1.18914	0.27107	1.34185	0.424228	insig
MW0011130	C30H50O4	(3alphaOH,20S,24S)-3,19:20,24-Diepoxydammarane-3,25-diol	Alcohol and amines	Alcohols	-	59239.3	520422	92177.6	133049	283357	150529	143791	860644	692543	373013	119649	164371	1.1884	0.242004	1.90028	0.926208	insig
MW0110215	C20H30N6O5	Tyr-Pro-Arg	Amino acid and Its metabolites	Small Peptide	117186-48-8	2.40656e+06	2.93177e+07	349284	6.00815e+06	6.2023e+06	9.55778e+06	2.38684e+07	6.51939e+06	1.2066e+07	4.66929e+06	2.40296e+07	7.67818e+06	1.18795	0.471861	1.46412	0.550034	insig
MEDP0009	C9H11NO3	L-Tyrosine	Amino acid and Its metabolites	Amino acids	60-18-4	1.07266e+06	478739	555648	635660	483348	257825	756343	646548	544454	698811	969786	653559	1.18791	0.329583	1.2255	0.293372	insig
MW0136894	C24H32O5	Nevskin	Heterocyclic compounds	Heterocyclic compounds	61490-17-3	2.39946e+06	1.03569e+06	3.21773e+06	1.16957e+07	1.58203e+07	4.75526e+06	1.50359e+07	1.55978e+07	8.33356e+06	6.48951e+06	1.95782e+06	7.70938e+06	1.18407	0.422366	1.41619	0.502015	insig
MEDP0024	C3H7NO3	L-Serine	Amino acid and Its metabolites	Amino acids	56-45-1	1.93199e+07	1.22183e+07	1.91735e+07	2.2586e+07	1.29154e+07	7.56052e+06	2.10252e+07	1.30508e+07	1.08117e+07	2.16235e+07	3.90794e+07	2.67411e+07	1.18287	0.214748	1.41118	0.496906	insig
MEDP1397	C23H45NO4	Carnitine C16:0	FA	CAR	-	470257	795498	369511	439323	280060	640918	404737	188496	1.61256e+06	250823	236569	116266	1.18255	0.903145	0.93787	-0.0925395	insig
MW0009350	C19H21ClN2O	Pencycuron	Benzene and substituted derivatives	Benzene and substituted derivatives	66063-05-6	327246	278489	4.77934e+06	3.07628e+06	2.51246e+06	1.42811e+07	2.16552e+06	373178	120723	1.92062e+06	704185	375198	1.18224	0.188298	0.224092	-2.15784	down
MEDN1213	C9H10O3	2-(4-hydroxyphenyl) propionate	Benzene and substituted derivatives	Phenolic acids	938-96-5	2.54861e+06	298088	755998	1.45596e+06	1.12164e+06	321020	6.24036e+06	1.15172e+06	1.57622e+06	538178	3.34751e+06	684372	1.18175	0.265439	2.0824	1.05825	up
MEDP1080	C13H15N3O3	Gly-Trp	Amino acid and Its metabolites	Small Peptide	2390-74-1	132060	63894.2	78575.6	117631	85498.2	36894.2	173784	65281.8	68969.9	147368	170702	87592.8	1.17944	0.219502	1.38702	0.471994	insig
MW0149016	C18H24O5S	Estradiol-17 3-sulfate	Heterocyclic compounds	Heterocyclic compounds	-	6.01237e+06	3.69485e+06	1.22536e+06	2.24222e+06	998881	1.30245e+06	3.40315e+06	2.19146e+06	2.0888e+06	4.49864e+06	8.01384e+06	3.08343e+06	1.17817	0.305841	1.50421	0.589005	insig
MEDP2602	C16H21N3O3	Val-Trp	Amino acid and Its metabolites	Small Peptide	24587-37-9	698449	351215	531477	1.20539e+06	947666	512346	1.20165e+06	691650	828971	769688	613320	943521	1.17744	0.411807	1.18892	0.249652	insig
MEDN1057	C5H12O9P2	2-Methyl-d-erythritol 2,4-cyclodiphosphate	Carbohydrates and Its metabolites	Phosphate sugars	143488-44-2	1.06542e+06	849488	1.09378e+06	751804	774125	1.31186e+06	3.00044e+06	680268	632587	2.75181e+06	4.2764e+06	734843	1.17726	0.162153	2.06558	1.04655	up
MEDP2560	C9H19N3O4	Ser-Lys	Amino acid and Its metabolites	Small Peptide	22677-61-8	1.06354e+06	511190	824757	1.04644e+06	964565	586826	926630	1.17511e+06	1.41931e+06	674659	640429	2.56618e+06	1.17654	0.240755	1.48126	0.566823	insig
MEDN0098	C6H5NO2	2-Picolinic Acid	Heterocyclic compounds	Pteridines and derivatives	98-98-6	3.06348e+06	2.21295e+07	2.98835e+06	9.58564e+06	9.75727e+06	1.11201e+07	8.76874e+06	28957528	1.40054e+07	7.97394e+06	1.03767e+07	1.21259e+07	1.17589	0.380474	1.40181	0.48729	insig
MW0147794	C23H32O5	Corticosterone 21-acetate	Aldehyde,Ketones,Esters	Esters	1173-26-8	214772	82045.2	214994	190005	123672	159103	180698	154468	259698	162535	277211	191213	1.17422	0.214215	1.24501	0.316156	insig
MW0146431	C21H18O8	Auramycinone	Benzene and substituted derivatives	Benzene and substituted derivatives	78173-89-4	136551	244613	2.15296e+06	1.91693e+06	2.6369e+06	556574	2.47562e+06	1.87337e+06	2.5856e+06	1.34206e+06	986897	508049	1.17294	0.540738	1.27825	0.354166	insig
MW0142242	C12H11NO2	2'-Aminobiphenyl-2,3-diol	Benzene and substituted derivatives	Benzene and substituted derivatives	-	2.36826e+06	5.65755e+06	7.70387e+06	9.8585e+06	8.23262e+06	1.7855e+07	4.67801e+06	6.39052e+06	1.06635e+07	3.0667e+06	2.2156e+06	4.41204e+06	1.17128	0.206932	0.608146	-0.717512	insig
MW0015378	C18H32O3	9(10)-Epoxy-12Z-octadecenoic acid	FA	Oxidized lipids	61949-82-4	1.18266e+07	2.6594e+06	1.17346e+07	1.01988e+07	6.00722e+06	4.61161e+06	6.01699e+06	8.8945e+06	3.59056e+06	5.64469e+06	1.29383e+06	4.55719e+06	1.16915	0.173427	0.637732	-0.648977	insig
MW0014901	C21H32O5	Tetrahydrocortisone	Hormones and hormone related compounds	Hormones and hormone related compounds	53-05-4	384934	3.99151e+06	3.01537e+06	5.11439e+06	6.58895e+06	5.69138e+06	1.04865e+06	3.76632e+06	2.21284e+06	1.37221e+06	891661	1.43444e+06	1.1682	0.0520114	0.43274	-1.20843	down
MW0169894	C15H12O7	Taxifolin	Flavonoids	Flavonoid	480-18-2	29274.6	165788	24820.3	62886	172684	91641.6	9	9	9	9	9	9	3.10998	0.0187157	9.87032e-05	-13.3065	down
MEDN1285	C21H44NO7P	LPE(0:0/16:0)	GP	LPE	-	4.58852e+06	541731	3.29289e+06	2.72333e+06	3.04723e+06	401297	3.00287e+06	2.14536e+06	2.69344e+06	2.41771e+06	7.76035e+06	2.26921e+06	1.16677	0.41445	1.39013	0.475218	insig
MEDN0366	C21H44NO7P	LPE(16:0/0:0)	GP	LPE	-	4.58852e+06	541731	3.29289e+06	2.72333e+06	3.04723e+06	401297	3.00287e+06	2.14536e+06	2.69344e+06	2.41771e+06	7.76035e+06	2.26921e+06	1.16677	0.41445	1.39013	0.475218	insig
MW0155547	C31H48O6	Phytolaccinic acid	Terpenoids	Triterpene	54928-05-1	1.65318e+06	1.33724e+06	1.92254e+06	2.08343e+06	1.93607e+06	3.25308e+06	1.06655e+06	1.60168e+06	2.94147e+06	1.38471e+06	1.1095e+06	1.76102e+06	1.16628	0.342934	0.80956	-0.304791	insig
MEDP1778	C5H11NO2	L-Norvaline	Amino acid and Its metabolites	Amino acids	6600-40-4	3.32177e+06	2.09428e+06	746479	1.83748e+06	1.96751e+06	1.4727e+06	2.05391e+06	3.35787e+06	2.38761e+06	1.55257e+06	2.46854e+06	2.58478e+06	1.16351	0.272994	1.25918	0.332481	insig
MEDP0026	C5H11NO2	L-Valine	Amino acid and Its metabolites	Amino acids	72-18-4	3.32177e+06	2.09428e+06	746479	1.83748e+06	1.96751e+06	1.4727e+06	2.05391e+06	3.35787e+06	2.38761e+06	1.55257e+06	2.46854e+06	2.58478e+06	1.16351	0.272994	1.25918	0.332481	insig
MEDP2607	C16H19N3O4	Hyp-Trp	Amino acid and Its metabolites	Small Peptide	-	414418	185160	407327	541788	609680	181708	697513	439127	1.25476e+06	207255	258473	1.89556e+06	1.16266	0.203174	2.03099	1.02219	up
MEDN1448	C22H32O3	(±)19(20)-EpDPE(A)	FA	Oxidized lipids	-	1.84159e+06	80535	1.47029e+06	1.13927e+06	1.66641e+06	391405	1.53809e+06	1.24592e+06	2.36858e+06	2.11966e+06	395496	2.20782e+06	1.1608	0.223784	1.49868	0.583694	insig
MEDP1658	C26H54NO6P	LPC(O-18:1/0:0)	GP	LPC	87907-66-2	1.81928e+06	203365	107626	235957	152553	124906	280225	2.85209e+06	1.40258e+06	157630	536164	334859	1.16031	0.364199	2.10446	1.07345	up
MEDP2313	C7H13N3O4	Gly-Gln	Amino acid and Its metabolites	Small Peptide	13115-71-4	1.32023e+07	1.46439e+07	1.18021e+07	1.40985e+07	1.93921e+07	2.22047e+07	1.00862e+07	1.8577e+07	2.23794e+07	4.72026e+06	4.03592e+06	1.67807e+07	1.15949	0.401329	0.803194	-0.31618	insig
MEDP0020	C5H11NO2S	L-Methionine	Amino acid and Its metabolites	Amino acids	63-68-3	706855	2.19669e+07	85412.1	1.04886e+07	2.31635e+06	1.31701e+07	6.06075e+06	8.02828e+06	5.69435e+06	3.83601e+06	5.19778e+07	9.86349e+06	1.15913	0.488533	1.75361	0.810325	insig
MEDP1737	C21H32O2	5α-Pregnane-3,20-dione	CoEnzyme and vitamins	CoEnzyme and vitamins	566-65-4	2.31103e+06	1.28572e+06	1.03124e+06	1.95315e+06	3.98757e+06	1.00558e+06	2.1355e+06	6.23617e+06	5.15347e+06	3.34844e+06	589556	3.28675e+06	1.15884	0.146779	1.79276	0.84218	insig
MW0141635	C24H34O5	17-phenyl trinor PGF2 methyl ester	Hormones and hormone related compounds	Hormones and hormone related compounds	38315-47-8	1.08567e+06	7.3723e+06	2.85094e+06	4.09715e+06	5.36302e+06	8.07896e+06	2.92843e+06	4.26187e+06	4.2758e+06	2.28686e+06	526217	2.21549e+06	1.15552	0.136366	0.571778	-0.806474	insig
MW0137421	C40H36O10	Artonin D	Heterocyclic compounds	Heterocyclic compounds	-	2.97429e+06	484080	741919	2.06228e+06	1.36911e+06	22582.5	1.55596e+06	622056	1.88437e+06	1.37352e+06	3.82849e+06	2.05167e+06	1.15483	0.35276	1.4784	0.564037	insig
MEDP0240	C8H11NO3	Pyridoxine	CoEnzyme and vitamins	CoEnzyme and vitamins	65-23-6	228067	311608	1.30799e+06	2.71905e+06	828018	447863	634804	740469	3.88617e+06	1.03997e+06	1.55018e+06	1.0034e+06	1.15442	0.445526	1.51559	0.599882	insig
MEDP2372	C24H41N3O16	N,N',N''-Triacetyl-chitotriose	Carbohydrates and Its metabolites	Carbohydrates and Its metabolites	38864-21-0	82221.4	116078	204134	217043	386609	158691	304557	733284	165820	128722	160075	263577	1.15219	0.366354	1.50762	0.592268	insig
MEDN1398	C8H17NO2	8-Aminooctanoic Acid	Organic acid And Its derivatives	Organic acid And Its derivatives	1002-57-9	169246	111062	79745.2	127031	90788.4	117862	303104	88255.3	292817	143869	148340	92824	1.15	0.18186	1.5368	0.619933	insig
MW0163755	C21H34O5	2-hydroxy-1-[(3R,10S,11S,13S,17R)-3,11,17-trihydroxy-10,13-dimethyl-1,2,3,4,5,6,7,8,9,11,12,14,15,16-tetradecahydrocyclopenta[a]phenanthren-17-yl]ethanone	Aldehyde,Ketones,Esters	Ketones	-	378755	277448	490769	1.7967e+06	660326	896147	182623	1.06145e+06	644521	275683	152241	475061	1.14997	0.317699	0.620331	-0.68889	insig
MW0155531	C32H18N8	Phthalocyanine	Amino acid and Its metabolites	polypeptide	574-93-6	85242.2	1.45263e+06	258261	477838	1.01778e+06	1.18375e+06	177718	500095	829810	135385	121898	236723	1.14979	0.143146	0.447242	-1.16087	down
MEDP2382	C9H12NO6P	O-phosphate-L-tyrosine	Amino acid and Its metabolites	Amino acid derivatives	21820-51-9	39777.9	152819	136075	170543	174681	92636.7	158368	165773	220875	108195	175304	118585	1.14972	0.294449	1.23557	0.305171	insig
MW0003998	C9H8O5	3-Formyl-2,4-dihydroxy-6-methylbenzoic acid	Benzene and substituted derivatives	Benzene and substituted derivatives	479-25-4	1.21033e+06	2.00215e+07	3.02919e+06	3.90123e+06	5.48741e+06	4.19073e+06	2.4619e+06	3.09697e+06	7.8529e+06	1.47424e+06	1.07617e+06	2.58694e+06	1.1485	0.319915	0.490194	-1.02858	down
MEDP2505	C9H17N3O4S	Asn-Met	Amino acid and Its metabolites	Small Peptide	-	22064.9	146560	11282	89738	44354.5	66129.3	76187.6	77997.6	63249.2	34996.8	171163	119052	1.14818	0.359991	1.42753	0.513526	insig
MW0157725	C21H41N7O7	Thr-Lys-Gln-Lys	Amino acid and Its metabolites	Small Peptide	-	7.27859e+06	3.37571e+07	6.11544e+06	1.75391e+07	1.85282e+07	1.88523e+07	1.58329e+07	1.11896e+07	1.14e+07	8.23642e+06	3.65925e+06	1.20147e+07	1.1469	0.179263	0.610684	-0.711502	insig
MW0108686	C19H27NO3	Nateglinide	Flavonoids	Flavones	105816-04-4	880073	248235	677976	932495	850670	184912	1.51669e+06	822318	561164	365776	631460	1.74815e+06	1.14569	0.273665	1.49577	0.580886	insig
MEDN1444	C22H32O3	16-HDoHE	FA	Oxidized lipids	90780-51-1	3.22914e+06	114786	1.48536e+06	5.58741e+06	6.27226e+06	2.11979e+06	5.87431e+06	5.04554e+06	2.66443e+06	4.04132e+06	1.62718e+06	3.96203e+06	1.14568	0.544695	1.23426	0.303642	insig
MEDP2567	C10H17N3O4	Pro-Gln	Amino acid and Its metabolites	Small Peptide	18668-08-1	2.49687e+06	1.23613e+06	1.49265e+06	2.37922e+06	3.73673e+06	1.58629e+06	5.37243e+06	2.44826e+06	2.2526e+06	2.08744e+06	1.33113e+06	4.21822e+06	1.145	0.303892	1.36991	0.454083	insig
MEDP1950	C10H13N4O7P	2'-Deoxyinosine-5'-monophosphate	Nucleotide And Its metabolites	Nucleotide And Its metabolites	3393-18-8	603801	554889	2.31917e+06	2.1659e+06	906120	3680.26	566942	10200.9	675807	37680.4	420249	7919.8	1.14399	0.0920768	0.262269	-1.93088	down
MW0012793	C23H47O7P	1-eicosanoyl-glycero-3-phosphate	GP	PA	-	870686	454153	265595	1.58929e+06	489859	107537	507888	267453	1.7504e+06	784112	3.51115e+06	844792	1.14057	0.268185	2.02953	1.02115	up
MEDN0406	C9H10O3	3-(3-Hydroxyphenyl)Propionate Acid	Organic acid And Its derivatives	Organic acid And Its derivatives	621-54-5	2.98048e+06	331528	734304	1.52285e+06	1.28561e+06	372193	6.7135e+06	1.1965e+06	1.61176e+06	608260	3.90368e+06	696378	1.14018	0.280259	2.03821	1.0273	up
MW0012685	C24H32O8	17beta-Estradiol 3-(beta-D-glucuronide)	Hormones and hormone related compounds	Hormones and hormone related compounds	15270-30-1	1.49977e+07	94982.9	2.75868e+07	7.23626e+06	2.04615e+06	33240.5	943534	198741	206798	3.26253e+06	10836	504742	1.13589	0.139529	0.098609	-3.34214	down
MEDN1886	C9H10O3	(S)-2-Hydroxy-3-phenylpropanoic acid	Organic acid And Its derivatives	Organic acid And Its derivatives	20312-36-1	2.34884e+06	283283	655592	1.201e+06	989452	297528	5.33032e+06	1.05173e+06	1.30692e+06	472433	3.00026e+06	565369	1.13904	0.274793	2.03041	1.02177	up
MEDP2584	C13H18N2O4	Phe-Thr	Amino acid and Its metabolites	Small Peptide	51352-44-4	3.17803e+06	1.4448e+06	3.63741e+06	3.15462e+06	3.95209e+06	1.2385e+06	4.55148e+06	3.32247e+06	5.13125e+06	2.58182e+06	1.6202e+06	5.62517e+06	1.13888	0.220517	1.37499	0.459425	insig
MEDP1022	C13H18N2O4	Thr-Phe	Amino acid and Its metabolites	Small Peptide	16875-27-7	3.17803e+06	1.4448e+06	3.63741e+06	3.15462e+06	3.95209e+06	1.2385e+06	4.55148e+06	3.32247e+06	5.13125e+06	2.58182e+06	1.6202e+06	5.62517e+06	1.13888	0.220517	1.37499	0.459425	insig
MW0052883	C15H28O7P2	Farnesyl diphosphate	Organic acid And Its derivatives	Phosphoric acids	372-97-4	44257.8	80144	87264.3	156851	261976	290485	9	9	9	9	9	9	3.11153	0.0143237	5.86334e-05	-14.0579	down
MW0009152	C8H11NO2	Norfenefrine	Benzene and substituted derivatives	Phenolics	536-21-0	8.23538e+06	1.14541e+07	1.93729e+07	2.20074e+07	3.51754e+07	1.80651e+07	1.12633e+07	2.43758e+07	1.97907e+07	7.43779e+06	5.05867e+06	9.02122e+06	1.1378	0.237525	0.673146	-0.57101	insig
MEDP1460	C20H28O3	Hydroxyeicosapentaenoic acid	FA	FFA	-	5.77761e+06	452977	2.52742e+06	3.9437e+06	7.61537e+06	834541	6.30426e+06	7.59472e+06	1.88437e+07	6.84639e+06	467635	6.91267e+06	1.1376	0.154936	2.2206	1.15095	up
MW0017134	C14H26O2	cis-11-Methyl-2-dodecenoic acid	FA	FFA	677354-23-3	251441	270257	495408	311854	507403	392666	258367	504364	208352	236178	196994	322946	1.13673	0.230525	0.774867	-0.367979	insig
MEDP0395	C6H11NO2	Piperidine acid	Organic acid And Its derivatives	Organic acid And Its derivatives	3105-95-1	2.75305e+07	7.94026e+07	2.79246e+07	5.20859e+07	8.86e+07	6.97834e+07	6.55285e+07	1.32414e+08	8.66289e+07	3.30899e+07	5.24672e+07	1.11888e+08	1.13667	0.251868	1.39583	0.481119	insig
MEDP1682	C17H25N3O4	Leu-Gly-Phe	Amino acid and Its metabolites	Small Peptide	-	1.90896e+06	1.32253e+06	2.11018e+06	4.80983e+06	3.9255e+06	1.2308e+06	5.06878e+06	3.14571e+06	3.75271e+06	1.58211e+06	1.94898e+06	4.80756e+06	1.13625	0.345256	1.3265	0.407628	insig
MEDN0375	C18H30O3	13-HOTrE	FA	Oxidized lipids	87984-82-5	373028	32837.4	299178	326985	144404	97370.2	168188	81800.6	97513.7	192121	17307.2	82793.2	1.13611	0.134196	0.502216	-0.993621	insig
MEDP2412	C8H10N2O2	N-(2-hydroxyethyl)-3-pyridinecarboxamide	Heterocyclic compounds	Heterocyclic compounds	6265-73-2	2.90647e+06	1.6266e+06	1.69331e+06	1.74315e+06	1.66469e+06	1.16818e+06	2.51261e+06	1.83817e+06	1.61542e+06	2.15642e+06	2.83876e+06	1.80166e+06	1.13589	0.310455	1.1815	0.240621	insig
MW0148239	C14H25N3O6S	delta-(L-2-Aminoadipyl)-L-cysteinyl-D-valine	Amino acid and Its metabolites	Small Peptide	-	419026	227382	2.64893e+06	717284	2.17486e+06	414236	9	9	9	9	9	9	3.10539	0.0485871	8.17969e-06	-16.8995	down
MADP0570	C11H14N4O4	Tubercidin	Nucleotide And Its metabolites	Nucleotide and Its metabolites	69-33-0	1.71329e+06	4.75828e+06	4.5859e+06	6.75439e+06	6.02582e+06	1.51879e+07	3.40825e+06	5.17265e+06	7.00081e+06	2.35727e+06	1.87853e+06	3.00906e+06	1.13514	0.227625	0.584913	-0.773706	insig
MW0002223	C7H10N2	2,4-Diaminotoluene	Benzene and substituted derivatives	Benzene and substituted derivatives	95-80-7	500907	68136.2	140652	295604	248805	65343.1	1.2145e+06	223932	295124	123562	585247	128836	1.1343	0.298468	1.9487	0.962512	insig
MEDN0362	C23H46NO7P	LPE(18:1/0:0)	GP	LPE	-	1.12435e+07	831956	3.24899e+06	2.3742e+06	5.10763e+06	411553	6.23813e+06	2.68291e+06	4.92697e+06	3.58847e+06	6.20544e+06	2.97189e+06	1.13378	0.756969	1.14627	0.196943	insig
MW0013858	C24H38O5	3,7-Dihydroxy-12-oxocholanoic acid	Organic acid And Its derivatives	Organic acid And Its derivatives	2458-08-4	574977	670158	255070	831163	490180	165418	1.06316e+06	438213	386546	840992	2.46518e+06	322182	1.13296	0.269948	1.84678	0.885012	insig
MW0015106	C15H28O4	7(14)-Bisabolene-2,3,10,11-tetrol	Alcohol and amines	Alcohols	-	235240	389660	341745	327378	417902	430043	326214	407577	245611	186403	283321	327323	1.13282	0.185695	0.829353	-0.269941	insig
MW0063689	C27H34N2O9	Strictosidine	Alkaloids	Alkaloids	20824-29-7	663018	131145	284984	1.24569e+06	1.16672e+06	519873	1.41919e+06	752400	373412	1.30848e+06	804621	518561	1.1326	0.460671	1.29048	0.367905	insig
MEDN1589	C12H20O4	Traumatic acid	Organic acid And Its derivatives	Organic acid And Its derivatives	6402-36-4	487036	337258	882113	451188	454717	484240	651014	976092	390929	1.97894e+06	701227	324552	1.13237	0.261966	1.62205	0.697816	insig
MEDP2472	C22H42N4O8S2	Pantethine	Alcohol and amines	Alcohols	16816-67-4	1.0544e+06	26124	404900	486143	67186.1	24154.4	161910	426713	317598	351026	347431	729240	1.12972	0.810275	1.13137	0.178072	insig
MEDN1443	C22H32O3	11-HDoHE	FA	Oxidized lipids	87018-59-5	1.35513e+07	2.32996e+06	6.51378e+06	2.76e+07	3.23302e+07	1.55277e+07	2.6338e+07	2.58398e+07	1.52585e+07	2.01933e+07	9.13368e+06	1.98019e+07	1.12936	0.58435	1.19123	0.25245	insig
MW0160206	C11H14N4O4S	2-(hydroxymethyl)-5-(6-methylsulfanylpurin-9-yl)oxolane-3,4-diol	Nucleotide And Its metabolites	Nucleotide and Its metabolites	-	1.01368e+07	5.54302e+06	1.22254e+07	8.32094e+06	5.70248e+06	4.69416e+06	1.10222e+07	5.46245e+06	4.5623e+06	35351146	1.05586e+07	1.76008e+07	1.1289	0.239827	1.81365	0.858896	insig
MW0143139	C18H22O	4-(1-Ethyl-2-phenylbutyl)phenol	Benzene and substituted derivatives	Benzene and substituted derivatives	-	100611	78876.3	106939	82808.1	68414.6	46692.4	74002.9	70098.8	71475	69435	51554.6	70559.2	1.12764	0.223516	0.840575	-0.250552	insig
MEDP2327	C11H23N5O3	Val-Arg	Amino acid and Its metabolites	Small Peptide	37682-75-0	1.36048e+06	549705	1.37619e+06	2.00849e+06	2.40922e+06	1.26078e+06	2.4422e+06	2.28036e+06	2.40756e+06	1.11162e+06	781889	4.65752e+06	1.12757	0.241955	1.52609	0.609837	insig
MEDP2555	C9H15N3O4	Pro-Asn	Amino acid and Its metabolites	Small Peptide	107856-82-6	1.51442e+06	1.17724e+06	1.75215e+06	2.3667e+06	2.97178e+06	1.63152e+06	3.70786e+06	2.64978e+06	4.46062e+06	1.6352e+06	845730	4.69966e+06	1.12739	0.157599	1.57694	0.657126	insig
MEDN0141	C9H12N2O5	2'-Deoxyuridine	Nucleotide And Its metabolites	Nucleotide And Its metabolites	951-78-0	285691	598104	92969.2	572258	375152	991410	287396	2.0899e+06	620033	137278	2.71463e+06	1.83023e+06	1.12634	0.133388	2.63394	1.39722	up
MEDN1965	C5H8O5	α-Hydroxyglutaric Acid (sodium salt)	Organic acid And Its derivatives	Organic acid And Its derivatives	40951-21-1	1.95542e+06	3.21885e+06	1.00069e+06	2.31773e+06	2.76716e+06	2.66958e+06	1.63311e+06	3.61083e+06	3.9681e+06	2.27231e+06	3.12539e+06	3.23155e+06	1.12589	0.200508	1.28083	0.357083	insig
MW0016424	C24H36O4	Cavipetin C	Terpenoids	Ditepenoids	-	555327	541878	297889	761199	495082	152638	958475	402726	384467	778978	2.2603e+06	302068	1.12477	0.271885	1.81419	0.859327	insig
MEDP2433	C11H22N2O3	Val-Ile	Amino acid and Its metabolites	Small Peptide	20556-14-3	2.46877e+07	1.01127e+07	2.99463e+07	4.16592e+07	3.24814e+07	1.63986e+07	3.19445e+07	2.67159e+07	2.98151e+07	3.36305e+07	1.78511e+07	6.19973e+07	1.12343	0.336482	1.30053	0.379101	insig
MEDP2434	C11H22N2O3	Val-Leu	Amino acid and Its metabolites	Small Peptide	3989-97-7	2.46877e+07	1.01127e+07	2.99463e+07	4.16592e+07	3.24814e+07	1.63986e+07	3.19445e+07	2.67159e+07	2.98151e+07	3.36305e+07	1.78511e+07	6.19973e+07	1.12343	0.336482	1.30053	0.379101	insig
MEDN0754	C22H32O3	(±)17-HDHA	FA	Oxidized lipids	90780-52-2	1.15838e+07	1.58326e+06	5.56869e+06	2.28562e+07	2.30701e+07	9.83216e+06	2.2311e+07	1.78092e+07	1.11605e+07	1.51735e+07	7.16082e+06	1.56994e+07	1.12327	0.573474	1.19895	0.261767	insig
MEDN0863	C27H46O2	25-Hydroxycholesterol	Hormones and hormone related compounds	Hormones and hormone related compounds	2140-46-7	171791	21209.9	115395	244538	307587	61406.3	211317	249144	315897	249402	57048.2	175148	1.1202	0.352917	1.36449	0.448357	insig
MEDP1866	C20H23N3O4	Gly-Phe-Phe	Amino acid and Its metabolites	Small Peptide	13116-21-7	328915	219788	342572	775789	544238	286891	666414	454446	430091	347768	339888	922403	1.11918	0.399129	1.26532	0.339501	insig
MW0155485	C9H10O	Phenylacetone	Benzene and substituted derivatives	Benzene and substituted derivatives	103-79-7	3.1593e+06	2.42429e+06	4.48746e+06	2.87649e+06	3.06781e+06	2.13424e+06	2.41494e+06	2.78849e+06	2.94082e+06	2.86698e+06	2.09223e+06	2.33867e+06	1.11881	0.25353	0.850825	-0.233066	insig
ZINC87528413	C30H50O2	11alpha-Hydroxy-beta-amyrin	Alcohol and amines	Alcohols	-	131734	18851.2	90046	62880.2	338241	110035	464989	265576	46380.4	133092	72879.4	166558	1.11698	0.416061	1.52899	0.612577	insig
MEDP2359	C14H25NO11	N-acetyl-D-Lactosamine	Carbohydrates and Its metabolites	Carbohydrates and Its metabolites	32181-59-2	2.7281e+06	820154	949698	1.80042e+06	1.23219e+06	3.07286e+06	2.44006e+06	3.41838e+06	3.57484e+06	551400	4.53031e+06	3.44764e+06	1.11537	0.104787	1.69404	0.76047	insig
MEDP2468	C17H23N3O3	Trp-Ile	Amino acid and Its metabolites	Small Peptide	64339-42-0	1.21046e+06	438861	905700	1.50506e+06	997682	386449	1.26365e+06	868623	1.95263e+06	1.19844e+06	504857	2.04736e+06	1.11451	0.221164	1.43925	0.525314	insig
MEDP2116	C8H8O3	2,6-Dihydroxyacetophenone	Benzene and substituted derivatives	Benzene and substituted derivatives	699-83-2	1.32588e+06	357317	1.93154e+06	879755	942686	434227	559349	908369	678420	813117	213009	467852	1.114	0.198016	0.619974	-0.689721	insig
MW0015647	C20H28O3	all-trans-5,6-Epoxyretinoic acid	Organic acid And Its derivatives	Organic acid And Its derivatives	13100-69-1	1.86685e+06	2.156e+06	2.16237e+06	1.90601e+06	2.08456e+06	1.67755e+06	1.55565e+06	2.00892e+06	2.00851e+06	1.85425e+06	1.84032e+06	1.83065e+06	1.11325	0.253206	0.936302	-0.0949536	insig
MEDN1958	C7H10O7	2-methyl citric acid	Organic acid And Its derivatives	Organic acid And Its derivatives	6061-96-7	77892.1	72374.1	130219	85702	92500.1	103105	93257	82687.1	97299.3	64489.3	65539.5	83169.9	1.10795	0.251239	0.865876	-0.207768	insig
MEDP0878	C6H11NO4	N-Methyl-L-Glutamate	Amino acid and Its metabolites	Amino acid derivatives	35989-16-3	1.23586e+06	1.67689e+06	1.33139e+06	2.12235e+06	2.09955e+06	1.75295e+06	1.94982e+06	3.69181e+06	2.02039e+06	1.14823e+06	1.81592e+06	2.28086e+06	1.10539	0.273888	1.26304	0.336903	insig
MW0000902	C21H32O4	[10]-Gingerdione	Benzene and substituted derivatives	Phenolics	-	4.58661e+06	1.11148e+07	1.18801e+07	2.06313e+07	1.52158e+07	7.37697e+06	7.16716e+06	1.55833e+07	6.47477e+06	5.75685e+06	7.2514e+06	5.64385e+06	1.103	0.204972	0.676179	-0.564523	insig
MEDP1679	C19H27N3O6	Glu-Val-Phe	Amino acid and Its metabolites	Small Peptide	31461-61-7	1.41067e+06	233371	1.19905e+06	1.11772e+06	800626	283574	1.15959e+06	998857	387702	1.39753e+06	1.37535e+06	1.29436e+06	1.10293	0.329007	1.31088	0.390531	insig
MW0145814	C24H43N7O7	Asn-Leu-Pro-Ala-Lys	Amino acid and Its metabolites	Small Peptide	-	959498	3.56155e+06	68486.2	104196	707772	5.16617e+06	2.65273e+06	4.67183e+06	5.4182e+06	316334	3.35635e+06	748054	1.10166	0.381438	1.62415	0.699686	insig
MW0007323	C19H23ClN2	Homochlorcyclizine	Benzene and substituted derivatives	Benzene and substituted derivatives	-	8991.6	12784.1	128375	93625.9	46140.5	303215	37917.1	19263.8	15167.3	65546.6	17787.2	12400.1	1.10161	0.17913	0.283381	-1.81919	down
MEDN0721	C6H9N3O3	2-Methyl-5-nitroimidazole-1-ethanol	Alcohol and amines	Alcohols	443-48-1	182012	134733	406704	333149	253025	219680	310610	227749	146860	192688	162842	90803.7	1.09793	0.226462	0.739913	-0.434572	insig
MEDP1330	C28H54NO7P	LPC(0:0/20:2)	GP	LPC	-	1.30125e+06	423177	95695.5	245031	395579	282526	579043	1.3652e+06	1.97207e+06	246720	1.24614e+06	174826	1.09749	0.199776	2.03554	1.02541	up
MEDP1328	C28H54NO7P	LPC(20:2/0:0)	GP	LPC	-	1.30125e+06	423177	95695.5	245031	395579	282526	579043	1.3652e+06	1.97207e+06	246720	1.24614e+06	174826	1.09749	0.199776	2.03554	1.02541	up
MEDP1855	C7H13NO4	DL-Aminopimelic acid	Organic acid And Its derivatives	Organic acid And Its derivatives	627-76-9	494441	1.78551e+06	1.44434e+06	3.34437e+06	1.82655e+06	1.11646e+06	739701	830930	1.22585e+06	440856	647852	2.7695e+06	1.09526	0.310689	0.664692	-0.589242	insig
MEDP1676	C18H25N3O6	Phe-Val-Asp	Amino acid and Its metabolites	Small Peptide	-	852251	148909	796121	761208	445433	196064	824673	643037	218123	1.03604e+06	735407	922865	1.09446	0.283169	1.3688	0.452912	insig
MEDN1904	C26H43NO5	Glycodeoxycholic acid	Bile acids	Bile acids	360-65-6	39728.1	438239	9871.01	91965.6	44087.8	271438	174267	19083.5	116541	10426.6	19813.3	22445.7	1.09323	0.275969	0.404965	-1.30413	down
MEDP0883	C6H4N4O2	2,4-Dihydroxypteridine	Heterocyclic compounds	Pteridines and derivatives	487-21-8	304025	103007	150175	156900	118688	75633.1	205762	134879	155667	213065	205121	164825	1.09226	0.449929	1.18812	0.248676	insig
MW0152216	C22H43N11O6	Leu-Arg-Asn-Arg	Amino acid and Its metabolites	Small Peptide	-	546306	6.13128e+06	2.27605e+06	8.03243e+06	6.31213e+06	7.4918e+06	1.08069e+06	3.93888e+06	1.17317e+06	3.41755e+06	1.32053e+06	2.7611e+06	1.09208	0.071992	0.444687	-1.16914	down
MW0109023	C2H3NO3	Oxamic acid	Organic acid And Its derivatives	Organic acid And Its derivatives	471-47-6	1.49574e+07	7.60835e+06	7.8924e+06	9.35263e+06	7.76419e+06	5.77332e+06	1.24645e+07	8.42096e+06	8.24131e+06	1.08284e+07	1.43805e+07	8.91686e+06	1.08935	0.3418	1.18565	0.245681	insig
FDATP01584	C42H60K2O16	Glycyrrhizinate dipotassium	Others	Others	68797-35-3	630561	48929.8	149879	181007	136615	5256.32	223859	47225.7	339004	204898	529946	317374	1.08745	0.470849	1.44266	0.528736	insig
MW0158607	C18H27N3O6	Tyr-Ser-Leu	Amino acid and Its metabolites	Small Peptide	-	993756	516140	1.03917e+06	1.76762e+06	1.6817e+06	488297	1.89331e+06	1.43162e+06	1.5225e+06	760188	802173	1.70569e+06	1.0871	0.380266	1.2511	0.323196	insig
MEDN0796	C20H32O5	PGF3α	FA	Oxidized lipids	745-64-2	1.3348e+06	551197	1.84934e+06	4.78976e+06	5.72422e+06	1.13037e+06	4.69858e+06	7.88358e+06	3.30773e+06	3.08568e+06	675794	3.09794e+06	1.0871	0.371109	1.47918	0.564797	insig
MW0011621	C17H34O2	14-Methylhexadecanoic acid	FA	FFA	5918-29-6	41127.9	278251	159583	118446	228742	129293	271708	292752	106721	159826	207377	147621	1.08512	0.41929	1.24131	0.311868	insig
MEDP2375	C6H10N2O2	Ectoine	Heterocyclic compounds	Heterocyclic compounds	96702-03-3	2.54686e+06	1.07844e+06	783928	959774	1.53939e+06	1.09581e+06	1.06847e+06	917861	1.65963e+06	584300	859796	992367	1.0842	0.318905	0.759904	-0.39611	insig
MW0146424	C18H25NO3	Atropine Methyl	Alkaloids	Tropan alkaloids	52-88-0	638538	1.64685e+06	1.12197e+06	1.0594e+06	2.10446e+06	7.50855e+06	1.13443e+06	1.32704e+06	1.16676e+06	859927	877682	1.02395e+06	1.08416	0.278419	0.453828	-1.13978	down
MW0150193	C25H36N4O10	Glu-Tyr-Ile-Glu	Amino acid and Its metabolites	Small Peptide	-	105476	203306	42420.6	69122.3	179652	107505	125814	208316	207411	71021.1	182173	125499	1.08323	0.320954	1.30072	0.379307	insig
MW0062214	C35H58N4O5S	Prostaglandin A1-biotin	Hormones and hormone related compounds	Hormones and hormone related compounds	-	43818.2	136534	321206	282275	3.0147e+06	386596	3.03094e+06	1.06746e+06	44288.9	781827	371962	882267	1.08299	0.611088	1.47636	0.56204	insig
MEDP2330	C7H14N2O5	Thr-Ser	Amino acid and Its metabolites	Small Peptide	61043-86-5	685098	247767	445234	789253	568820	401474	498683	653228	772302	418412	465173	1.89068e+06	1.08172	0.321908	1.49745	0.582512	insig
MW0000104	C33H38N4O8	7-Ethyl-10-(4-N-aminopentanoic acid)-1-piperidino)carbonyloxycamptothecin	Alkaloids	Alkaloids	181467-56-1	310075	62942.8	256821	246378	255824	44981.4	343832	233699	171253	404293	141313	202178	1.08029	0.412939	1.27149	0.346516	insig
MEDN1440	C22H32O3	13-HDoHE	FA	Oxidized lipids	90780-53-3	4.18865e+06	439625	1.93035e+06	8.23608e+06	8.79053e+06	3.94408e+06	7.21982e+06	7.29678e+06	4.30561e+06	5.72492e+06	2.31289e+06	5.55796e+06	1.07933	0.617171	1.17758	0.235824	insig
MW0014791	C16H32O3	5-Hydroxyhexadecanoic acid	Organic acid And Its derivatives	Organic acid And Its derivatives	-	284162	1.0404e+06	474751	892057	343212	451282	1.01085e+06	492868	447945	605698	3.50857e+06	592967	1.07863	0.335622	1.91026	0.933766	insig
MW0158698	C19H20N2O7	TyrMe-Ala-OH	Amino acid and Its metabolites	Small Peptide	-	2.1396e+06	2.62673e+07	7.19514e+06	1.24861e+07	2.22538e+07	3.19694e+07	7.57996e+06	9.4221e+06	1.90884e+07	3.79582e+06	3.74413e+06	5.52091e+06	1.07804	0.136385	0.480409	-1.05766	down
MEDN0807	C14H28O2	FFA(14:0)	FA	FFA	544-63-8	1.61765e+06	946627	1.8652e+06	1.777e+06	1.1042e+06	838334	1.03804e+06	1.13135e+06	1.03153e+06	1.69142e+06	842326	865412	1.0773	0.276054	0.809923	-0.304143	insig
MEDP1657	C24H52NO6P	PC(O-16:0/0:0)	GP	PC O	52691-62-0	4.70959e+06	607298	263336	850773	435763	420019	699368	7.26874e+06	3.23466e+06	451316	1.63735e+06	965264	1.07641	0.38597	1.95651	0.968285	insig
MEDN0325	C3H6O3	L-Lactic Acid	Organic acid And Its derivatives	Organic acid And Its derivatives	79-33-4	181396	6498.69	18556.2	29465.9	4050	6764.6	5418.92	6551.86	6801.71	11154.1	21528.1	8781.62	1.07569	0.323483	0.244137	-2.03424	down
MW0146186	C12H22N4O6	Asp-Lys-Gly	Amino acid and Its metabolites	Small Peptide	-	203557	131861	145452	132419	161546	130597	204835	130019	245934	115620	205776	190259	1.07443	0.219227	1.20654	0.270877	insig
MEDN1980	C9H18N2O3	Ala-Ile	Amino acid and Its metabolites	Small Peptide	29727-65-9	198006	102463	282298	477065	240194	94825.4	340528	165018	270254	245474	203308	650749	1.07248	0.405991	1.34447	0.427034	insig
MEDN1751	C16H32O2	2-Hexyldecanoic acid	FA	FFA	25354-97-6	7.83587e+06	6.25573e+06	6.22549e+06	7.73255e+06	1.2883e+07	1.03802e+07	9.17671e+06	1.35423e+07	8.02519e+06	1.11192e+07	6.75337e+06	9.7215e+06	1.0723	0.436277	1.13691	0.185124	insig
MEDP0250	C17H20N4O6	Riboflavin	CoEnzyme and vitamins	CoEnzyme and vitamins	83-88-5	4.81198e+06	6.08929e+06	1.43316e+07	1.08336e+07	2.85438e+07	2.76591e+07	2.24714e+07	3.70836e+07	1.1769e+07	1.29409e+07	9.80492e+06	2.01852e+07	1.07201	0.550985	1.23828	0.308335	insig
MW0124958	C24H22FNO2	Methanone,[1-(5-fluoropentyl)-6-hydroxy-1H-indol-3-yl]-1-naphthalenyl-	Aldehyde,Ketones,Esters	Ketones	1427521-35-4	1.38141e+06	218489	238208	673458	181398	150501	285705	225562	474204	774522	2.31106e+06	1.03118e+06	1.07109	0.342373	1.79438	0.843482	insig
MW0009557	C19H26O4S	Propargite	Benzene and substituted derivatives	Benzene and substituted derivatives	2312-35-8	3.35389e+06	285441	1.11168e+06	1.097e+06	823856	9671.12	1.14301e+06	346543	1.9816e+06	1.2568e+06	2.52244e+06	1.82469e+06	1.07059	0.50601	1.35823	0.441731	insig
MEDN0316	C3H9N3O3S	Guanidinoethyl Sulfonate	Organic acid And Its derivatives	Sulfonic acids	543-18-0	42699.8	590450	60552	67103.7	281907	685141	2.77959e+06	503209	3.52902e+06	40500.2	136919	296536	1.07057	0.200841	4.21666	2.0761	up
MEDP1986	C10H16N2O5	Glu-Pro	Amino acid and Its metabolites	Small Peptide	41745-47-5	344760	743349	576652	487627	810497	806537	1.26614e+06	917054	1.6258e+06	612996	248554	1.38414e+06	1.07006	0.138065	1.60627	0.68371	insig
MW0009764	C21H27NO5	Spirotetramat	Benzene and substituted derivatives	Benzene and substituted derivatives	203313-25-1	462457	75979.8	665558	529389	345280	123775	599328	411571	171973	887008	429860	425278	1.06909	0.396153	1.32808	0.409343	insig
MW0152015	C25H42N4O19	KDN2-3Gal1-4GlcNAcSp	Heterocyclic compounds	Heterocyclic compounds	-	1.27781e+07	860036	2.60547e+06	3.79783e+06	2.67079e+06	41622.9	4.17584e+06	851352	6.67539e+06	4.07221e+06	8.39247e+06	6.43705e+06	1.0662	0.563117	1.34502	0.427624	insig
MEDP1787	C11H15N3O6	N4-Acetylcytidine	Nucleotide And Its metabolites	Nucleotide And Its metabolites	3768-18-1	421781	149542	210697	289660	270961	228471	101526	240385	238935	185800	247635	231809	1.0643	0.254613	0.793126	-0.334379	insig
MW0000458	C13H14N2O2	Tetrahydroharman-3-carboxylic acid	Benzene and substituted derivatives	Benzene and substituted derivatives	5470-37-1	80964.2	44367.4	99135.7	20389	17687.9	55321.9	189129	22687.2	35918.6	97099	74298.8	166851	1.06418	0.188907	1.84349	0.88244	insig
MW0153104	C24H32N4O4	Lys-Phe-Phe	Amino acid and Its metabolites	Small Peptide	-	1.89784e+06	1.29444e+06	1.4823e+06	2.32139e+06	2.11072e+06	1.4714e+06	2.02816e+06	1.84889e+06	1.59466e+06	2.27505e+06	1.93806e+06	1.82748e+06	1.06416	0.438553	1.08832	0.122098	insig
MEDP1272	C27H44O8	20,26-dihydroxyecdysone	Hormones and hormone related compounds	Hormones and hormone related compounds	19458-46-9	3.25908e+07	1.02513e+07	1.2249e+06	3.8063e+06	3.35554e+06	2.53609e+06	5.359e+06	2.6614e+07	4.55665e+07	2.3529e+06	2.14453e+07	7.17469e+06	1.06349	0.302003	2.01828	1.01312	up
MW0003245	C22H34O2	2-Methyl-5-(8,11-pentadecadienyl)-1,3-benzenediol	Benzene and substituted derivatives	Phenolics	-	1.9984e+06	1.34987e+06	844034	3.14245e+06	2.00225e+06	2.13775e+06	2.45399e+06	2.24787e+06	3.49599e+06	2.6081e+06	1.10237e+06	3.02923e+06	1.06303	0.23789	1.30178	0.380481	insig
MW0000044	C8H17N	(S)-2-Propylpiperidine	Alkaloids	Alkaloids	458-88-8	263149	167635	328081	194337	226662	188326	185738	383609	258071	199537	259232	363749	1.06248	0.285959	1.20592	0.27014	insig
MEDN1966	C5H4N2O2	Pyrimidine-4-carboxylic acid sodium salt	Heterocyclic compounds	Heterocyclic compounds	819850-18-5	190817	1.20173e+06	208903	557899	505005	621105	488887	1.7084e+06	832740	318571	640892	735021	1.06214	0.359858	1.43801	0.524072	insig
MW0012861	C19H40NO7P	1-Myristoyl-2-hydroxy-sn-glycero-3-phosphoethanolamine	GP	PE	123060-40-2	6.44795e+06	1.99417e+06	7.93548e+06	6.27048e+06	6.38679e+06	1.12568e+06	1.04104e+07	2.72326e+06	5.84478e+06	4.9984e+06	2.7444e+07	3.93797e+06	1.06161	0.330852	1.83547	0.876151	insig
MEDN0171	C9H12N2O6	Uridine	Nucleotide And Its metabolites	Nucleotide And Its metabolites	58-96-8	1.41745e+06	320712	887166	2.03531e+06	662163	446552	479221	789918	1.11436e+06	1.39243e+06	2.47943e+06	2.41022e+06	1.06085	0.291774	1.502	0.586887	insig
MW0144131	C20H30O2	9beta-Pimara-7,15-dien-19-oate	Aldehyde,Ketones,Esters	Esters	-	2.55951e+06	88221.7	1.24067e+06	3.03354e+06	4.12507e+06	654958	3.2534e+06	2.68801e+06	1.70033e+06	3.70966e+06	630857	2.57365e+06	1.06059	0.555258	1.24389	0.314853	insig
MW0012748	C19H26O3	19-Oxotestosterone	Aldehyde,Ketones,Esters	Ketones	-	158117	224371	194955	320159	389823	792325	228300	302176	237231	176319	128280	246833	1.05988	0.24952	0.634278	-0.656812	insig
MEDP1789	C11H15N5O3	N6-methyl-2'-deoxyadenosine	Nucleotide And Its metabolites	Nucleotide And Its metabolites	2002-35-9	1.73384e+06	918615	652899	1.95807e+06	1.77925e+06	1.33616e+06	1.32937e+06	7.70003e+06	995675	591440	8.1281e+06	1.96007e+06	1.05964	0.210667	2.47107	1.30514	up
MEDP2575	C12H16N2O4	Tyr-Ala	Amino acid and Its metabolites	Small Peptide	730-08-5	1.07573e+06	526154	1.51636e+06	1.39175e+06	1.69559e+06	188801	1.25723e+06	1.22314e+06	2.10315e+06	976839	663383	2.32181e+06	1.05915	0.342505	1.33642	0.418369	insig
MW0054786	C16H28O3	Methoprene acid	Terpenoids	Sesquiterpenoids	53092-52-7	201315	51066.2	150029	165449	378403	169690	196933	697748	331157	213683	66520.9	294648	1.05882	0.28154	1.61359	0.690275	insig
MW0139983	C12H20O2	Yuzu lactone	Aldehyde,Ketones,Esters	Esters	-	99483.1	260191	49464.4	115120	115501	206219	150701	83976.3	146155	20669.8	116236	66882.4	1.05849	0.278127	0.69106	-0.533118	insig
MEDP0174	C5H4N4	Purine	Nucleotide And Its metabolites	Nucleotide And Its metabolites	120-73-0	6.20537e+06	2.96727e+06	3.25445e+06	3.83697e+06	3.32714e+06	2.14703e+06	4.84695e+06	3.64086e+06	3.11905e+06	4.29687e+06	5.83787e+06	3.77749e+06	1.0573	0.385211	1.17393	0.231342	insig
MEDN1525	C36H38N4O8	Coproporphyrin III	Nucleotide And Its metabolites	Nucleotide And Its metabolites	14643-66-4	56771.1	2941.19	83127.2	122290	73876.7	6829.93	85486.9	70049	36891.8	83117.2	86612.3	26608.8	1.05471	0.750494	1.12413	0.168813	insig
MEDP1331	C28H52NO7P	LPC(0:0/20:3)	GP	LPC	-	1.3277e+06	4.49698e+06	128082	57214	763516	1.95599e+06	3.82971e+06	2.16675e+06	3.54436e+06	475371	1.60593e+06	688002	1.05378	0.517186	1.41018	0.495877	insig
MEDP1332	C28H52NO7P	LPC(20:3/0:0)	GP	LPC	-	1.3277e+06	4.49698e+06	128082	57214	763516	1.95599e+06	3.82971e+06	2.16675e+06	3.54436e+06	475371	1.60593e+06	688002	1.05378	0.517186	1.41018	0.495877	insig
MW0012578	C22H30O5	16-Phenyltetranorprostaglandin E1	Hormones and hormone related compounds	Hormones and hormone related compounds	-	227657	103456	106774	217869	146940	54710.5	142988	98100.4	249968	260729	185487	168627	1.0536	0.299824	1.28982	0.36717	insig
MW0159070	C24H44N6O9	Val-Leu-Lys-Asp-Ser	Amino acid and Its metabolites	Small Peptide	-	111519	43051.6	310112	364924	261605	39619.7	208627	129819	147548	155160	289840	422769	1.05343	0.626747	1.19714	0.25959	insig
MEDP1749	C9H15N3O11P2	Cytidine 5'-diphosphate	Nucleotide And Its metabolites	Nucleotide And Its metabolites	63-38-7	4.23294e+06	3.83385e+06	3.01015e+06	1.0553e+06	2.92715e+06	1.69845e+07	4.44864e+06	1.55359e+07	1.42365e+06	1.07379e+07	5.23371e+06	1.20181e+07	1.05312	0.391227	1.54157	0.624403	insig
MW0158512	C24H39N5O6	Tyr-Leu-Ala-Lys	Amino acid and Its metabolites	Small Peptide	-	49765	129316	34905.3	30938.6	77852.1	126899	64236.9	74985.2	63696.6	43348	13085.1	34404.3	1.05265	0.24087	0.653262	-0.614267	insig
MW0062279	C20H30O5	Prostaglandin K2	Hormones and hormone related compounds	Hormones and hormone related compounds	275816-51-8	777752	35806.9	351880	1.06673e+06	1.15673e+06	357924	1.1371e+06	615745	695598	1.00758e+06	409824	499017	1.05117	0.646271	1.16495	0.220269	insig
MW0002352	C9H10O	2,5-Dimethylbenzaldehyde	Benzene and substituted derivatives	Benzene and substituted derivatives	-	616336	1.30299e+06	1.73764e+06	2.35816e+06	2.2822e+06	3.21151e+06	801172	2.04548e+06	2.14373e+06	1.02323e+06	357763	1.44973e+06	1.05084	0.221288	0.679573	-0.557299	insig
MEDP2444	C16H28N4O4S	Biocytin-(N'-Biotinyl-L-lysine)	CoEnzyme and vitamins	CoEnzyme and vitamins	576-19-2	20225.4	118625	30356.5	68405.2	32084	146207	39050.1	115529	109147	46025.7	187846	105777	1.05038	0.333508	1.45076	0.536804	insig
MEDP1502	C20H24O3	Trenbolone-acetate	CoEnzyme and vitamins	CoEnzyme and vitamins	10161-34-9	313821	1.16296e+06	9	448166	556989	581552	2.81058e+06	291644	1.00336e+06	812403	319233	570257	1.05016	0.310114	1.8957	0.92273	insig
MEDN1861	C16H31NO3	N-Myristoylglycine	Amino acid and Its metabolites	Amino acid derivatives	14246-55-0	196525	408261	279571	545886	246737	387573	191068	288345	854704	143567	131447	210949	1.04995	0.75233	0.881586	-0.181826	insig
MW0158474	C16H23N3O5	Tyr-Gly-Val	Amino acid and Its metabolites	Small Peptide	-	108333	101201	116616	131461	121487	109860	117862	104916	103881	85611.1	94672.3	128446	1.04867	0.275374	0.922245	-0.116778	insig
MEDN0755	C20H32O3	(±)17-HETE	FA	Oxidized lipids	128914-47-6	4.04947e+06	7.49368e+06	3.94541e+06	8.07993e+06	5.81031e+06	9.65553e+06	4.63702e+06	6.95284e+06	7.66449e+06	3.66829e+06	868450	6.64337e+06	1.04835	0.331112	0.779684	-0.359038	insig
MEDN0757	C20H32O3	(±)18-HETE	FA	Oxidized lipids	133268-58-3	4.04947e+06	7.49368e+06	3.94541e+06	8.07993e+06	5.81031e+06	9.65553e+06	4.63702e+06	6.95284e+06	7.66449e+06	3.66829e+06	868450	6.64337e+06	1.04835	0.331112	0.779684	-0.359038	insig
MEDP1870	C12H25N3O3	Ile-Lys	Amino acid and Its metabolites	Small Peptide	-	1.73999e+07	1.2562e+07	1.39554e+07	2.33472e+07	3.8104e+07	1.92688e+07	4.05985e+07	3.5461e+07	4.36857e+07	1.58173e+07	7.03144e+06	8.10843e+07	1.04729	0.189913	1.79463	0.84369	insig
MW0006708	C12H12N2O2S	Dapsone	Benzene and substituted derivatives	Benzene and substituted derivatives	80-08-0	201678	1.52545e+06	1.82025e+06	2.44592e+06	1.46224e+06	3.61508e+06	852945	1.64914e+06	1.16556e+06	533759	365435	862501	1.04666	0.104667	0.490428	-1.02789	down
MW0144551	C21H39N7O7	Ala-Gln-Val-Lys-Gly	Amino acid and Its metabolites	Small Peptide	-	630055	7.92317e+06	6.70664e+06	1.21103e+07	1.36775e+07	4.60086e+06	4.00082e+06	8.12992e+06	2.08402e+06	3.93681e+06	267463	2.58048e+06	1.04622	0.105433	0.460026	-1.12021	down
MEDN0758	C22H32O3	(±)4-HDHA	FA	Oxidized lipids	90906-40-4	1.74977e+07	793447	1.35163e+07	2.35468e+07	3.36209e+07	8.54175e+06	3.09063e+07	2.17827e+07	1.24616e+07	2.57955e+07	8.44407e+06	1.6886e+07	1.04595	0.603872	1.19237	0.253832	insig
MEDN0741	CH4O3S	Methanesulfonic acid	Organic acid And Its derivatives	Sulfonic acids	75-75-2	2.2751e+06	3.79836e+06	6.90683e+06	3.89028e+06	6.72887e+06	3.93451e+06	6.26989e+06	5.10012e+06	3.9059e+06	1.37652e+07	4.28049e+06	3.62349e+06	1.04577	0.396744	1.3418	0.42417	insig
MEDP1171	C28H56NO7P	Butenoyl-PAF	Others	Others	-	7.07604e+06	1.49082e+06	352134	1.05957e+06	896025	610614	747720	7.03797e+06	9.08934e+06	594916	4.44184e+06	2.02497e+06	1.04477	0.270964	2.08414	1.05945	up
MEDP1702	C28H56NO7P	LPC(0:0/20:1)	GP	LPC	-	7.07604e+06	1.49082e+06	352134	1.05957e+06	896025	610614	747720	7.03797e+06	9.08934e+06	594916	4.44184e+06	2.02497e+06	1.04477	0.270964	2.08414	1.05945	up
MEDP1326	C28H56NO7P	LPC(20:1/0:0)	GP	LPC	-	7.07604e+06	1.49082e+06	352134	1.05957e+06	896025	610614	747720	7.03797e+06	9.08934e+06	594916	4.44184e+06	2.02497e+06	1.04477	0.270964	2.08414	1.05945	up
MW0157613	C21H40N6O7	Thr-Gln-Leu-Lys	Amino acid and Its metabolites	Small Peptide	-	241864	1.63794e+06	85575.4	800061	860065	763217	163323	234365	182084	230431	1.08341e+06	262483	1.0442	0.198217	0.491281	-1.02538	down
MEDP2059	C19H30O2	Androstenediol	Hormones and hormone related compounds	Hormones and hormone related compounds	521-17-5	1.29666e+06	1.59568e+06	792478	1.40022e+06	1.31677e+06	1.5391e+06	1.35367e+06	1.41521e+06	1.35328e+06	1.45847e+06	1.74482e+06	1.47828e+06	1.04299	0.30674	1.10865	0.148809	insig
MW0125913	C22H23N3O	N-Phenyl-4-(quinolin-3-ylmethyl)piperidine-1-carboxamide	Heterocyclic compounds	Heterocyclic compounds	959151-50-9	1.42287e+06	190813	1.22421e+06	1.4589e+06	1.02591e+06	248628	1.50697e+06	1.22503e+06	361291	1.43875e+06	1.42821e+06	1.14564e+06	1.0427	0.401472	1.27544	0.350996	insig
MW0007363	C16H20N2O3	Imazamethabenz-methyl	Benzene and substituted derivatives	Benzene and substituted derivatives	69969-22-8	968652	1.21229e+06	1734981	1.40336e+06	2.18351e+06	1.4439e+06	2.0109e+06	2.12251e+06	2.02038e+06	955169	2.73603e+06	1.2222e+06	1.04215	0.29459	1.23701	0.306861	insig
MEDP1652	C20H21N7O7	10-Formyl-7,8-dihydrofolic acid	Heterocyclic compounds	Pteridines and derivatives	28459-40-7	63539.7	107906	37747.3	106602	71057.4	25642	51378.1	50848.8	159937	57578	152157	146736	1.03983	0.227073	1.49974	0.584715	insig
MEDN1420	C20H30O3	(±)14(15)-EpETE	FA	Oxidized lipids	131339-24-7	546368	90193.4	375631	337408	879003	61982.1	503247	663251	482386	605918	162168	337295	1.03959	0.608619	1.20243	0.265951	insig
MEDN1935	C5H10O6	D-ribonate lithium salt	Carbohydrates and Its metabolites	Sugars	642-98-8	226494	49489	546618	102681	163721	26527.6	315120	77734	66650.2	1.23899e+06	3.402e+06	62687.6	1.03868	0.269885	4.62845	2.21053	up
MW0013537	C11H22O3	2-Hydroxyundecanoate	Organic acid And Its derivatives	Organic acid And Its derivatives	-	168914	274398	98120.7	114348	80362.7	130911	88869.4	192458	122207	101202	106757	77226.6	1.03594	0.397877	0.794319	-0.332209	insig
MW0107124	C23H26F2N2O4	Glycine,N-[2-(3,5-difluorophenyl)acetyl]-L-alanyl-2-phenyl-,1,1-dimethylethyl ester,(2S)-	Aldehyde,Ketones,Esters	Esters	208255-80-5	290941	3.86433e+06	1.73424e+06	2.06624e+06	2.97061e+06	4.30809e+06	4.12899e+06	5.91577e+06	801182	2.58839e+06	3.14456e+06	5.27727e+06	1.03532	0.285323	1.43465	0.520702	insig
MW0009348	C18H29NO2	Penbutolol	Benzene and substituted derivatives	Phenolics	38363-41-6	1.00476e+07	1.32008e+07	6.57223e+06	1.13187e+07	8.99634e+06	1.32973e+07	1.08368e+07	1.06233e+07	1.0386e+07	1.22227e+07	1.50081e+07	1.273e+07	1.03329	0.304422	1.13201	0.178888	insig
MW0161894	C27H42O	(5S,10S,13R,14R,17R)-10,13-dimethyl-17-[(2R)-6-methylhept-5-en-2-yl]-1,2,4,5,6,7,11,12,14,15,16,17-dodecahydrocyclopenta[a]phenanthren-3-one	Aldehyde,Ketones,Esters	Ketones	-	647427	2.90451e+06	965073	846077	642902	1.11459e+06	749633	1.14208e+06	721597	500593	1.22073e+06	613171	1.0329	0.366081	0.69486	-0.525206	insig
MEDN1936	C9H15N3O4	Asn-Pro	Amino acid and Its metabolites	Small Peptide	-	160061	150660	77190.5	169901	278999	241834	234812	237767	418890	138342	91253.6	594387	1.0304	0.241544	1.59037	0.669367	insig
MW0140724	C26H51NO4S	(Z)-2-tetracos-15-enamidoethanesulfonic acid	Others	Others	-	4.01031e+07	1.25148e+07	1.64652e+06	4.81856e+06	4.42971e+06	4.01397e+06	6.54981e+06	3.28334e+07	5.56764e+07	3.06863e+06	2.73227e+07	9.07898e+06	1.02986	0.30085	1.99225	0.994398	insig
MW0010634	C18H22O4	Nordihydroguaiaretic acid	Benzene and substituted derivatives	Benzene and substituted derivatives	500-38-9	3.05528e+06	282308	492381	387934	435740	159141	604141	394043	596435	629346	4.42979e+06	1.1044e+06	1.02966	0.544609	1.61199	0.688842	insig
MEDP2368	C6H7N3O	6-aminonicotinamide	Nucleotide And Its metabolites	Nucleotide And Its metabolites	329-89-5	284465	334727	175646	336893	467737	452195	275123	445616	524961	281724	478805	422764	1.02933	0.329473	1.18391	0.243564	insig
MW0012105	C22H36O4	11-deoxy-16,16-dimethyl-PGE2	Hormones and hormone related compounds	Hormones and hormone related compounds	53658-98-3	9	29439	56209.9	45020.1	1.25911e+06	3.20065e+06	61329.2	9.32968e+06	87324	48250.2	1.1821e+06	57971	1.0285	0.544762	2.34545	1.22987	up
MW0122789	C10H16O4	alpha-Carboxy-delta-nonalactone	Aldehyde,Ketones,Esters	Esters	-	118143	125443	419917	327281	313392	106724	489598	435665	148271	305901	256189	158933	1.02816	0.440633	1.27192	0.347013	insig
MEDP0378	C14H17N5O8	N6-Succinyl Adenosine	Nucleotide And Its metabolites	Nucleotide And Its metabolites	4542-23-8	1.20972e+06	163082	1.0335e+06	789753	891497	78053.5	6.13095e+06	296137	228097	6.09217e+06	2.29291e+06	228975	1.02567	0.177311	3.66555	1.87403	up
MW0144610	C13H23N3O6	Ala-Ile-Asp	Amino acid and Its metabolites	Small Peptide	-	1.33937e+06	849639	1.85397e+06	2.36705e+06	2.63585e+06	1.02737e+06	3.31456e+06	2.73235e+06	1.47413e+06	1.37084e+06	1.3993e+06	1.87494e+06	1.02556	0.452083	1.20776	0.272339	insig
MEDN0408	C8HF15O2	Pentadecafluorooctanoic Acid	Organic acid And Its derivatives	Organic acid And Its derivatives	335-67-1	29558.5	8340.17	29413.6	22988.2	37531.1	19299.8	37101.3	39703.6	45775.6	29560.7	12515.4	26345.4	1.02333	0.275597	1.29817	0.376482	insig
MW0114388	C17H26O4	Embelin	Aldehyde,Ketones,Esters	Ketones	550-24-3	349947	259431	426806	557716	291375	324384	238983	533236	284227	278765	155943	365296	1.02235	0.413792	0.840152	-0.251278	insig
MEDP0228	C18H32O16	D-Melezitose	Carbohydrates and Its metabolites	Sugars	597-12-6	85976.8	37340.6	67456	97067.2	34038.6	22243.5	22964.8	16689.1	27590.6	56878.9	43852.9	78190.2	1.02132	0.325131	0.715345	-0.483289	insig
MEDP1039	C18H32O16	Maltotriose	Carbohydrates and Its metabolites	Sugars	1109-28-0	85976.8	37340.6	67456	97067.2	34038.6	22243.5	22964.8	16689.1	27590.6	56878.9	43852.9	78190.2	1.02132	0.325131	0.715345	-0.483289	insig
MEDP0233	C18H32O16	Raffinose	Carbohydrates and Its metabolites	Sugars	512-69-6	85976.8	37340.6	67456	97067.2	34038.6	22243.5	22964.8	16689.1	27590.6	56878.9	43852.9	78190.2	1.02132	0.325131	0.715345	-0.483289	insig
MEDN1917	C10H18N4O5	Gln-Gln	Amino acid and Its metabolites	Small Peptide	54419-93-1	113956	94666.4	91354.3	166585	161903	132530	94982.7	169352	305317	104335	100115	423687	1.02109	0.252283	1.57398	0.654415	insig
MW0012521	C22H36O5	16,16-dimethyl-PGE2	Hormones and hormone related compounds	Hormones and hormone related compounds	39746-25-3	1.46157e+06	3.66826e+06	5.38039e+06	7.71702e+06	1.50942e+07	1.20838e+07	1.90177e+06	7.37603e+06	4.12586e+06	4.70893e+06	1.94479e+06	3.26718e+06	1.01976	0.15296	0.513697	-0.961011	insig
MW0144024	C20H36O3	8,9-EE-14(Z)-E	Others	Others	-	40777	92302.3	39525	404151	47849.3	141344	30114.2	104853	137133	74028.9	9648.7	55753.8	1.01919	0.367838	0.537284	-0.896243	insig
MW0102812	C20H28O6S	Tiaprost	FA	Oxidized lipids	71116-82-0	3.21453e+06	719122	2.84877e+06	4.98474e+06	2.35806e+06	1.4422e+06	2.31856e+06	1.91883e+06	1.71433e+06	2.36454e+06	285733	1.28157e+06	1.01837	0.20646	0.634888	-0.655426	insig
MW0139812	C38H40N2O7	Thalsimine	Heterocyclic compounds	Heterocyclic compounds	-	1.75196e+06	3.85695e+06	418717	3.21074e+06	1.69683e+06	3.22904e+06	3.3967e+06	1.88154e+06	1.0413e+06	3.53242e+06	1.56452e+07	3.09511e+06	1.01736	0.333901	2.01863	1.01337	up
MW0151663	C9H18N2O3	Ile-Ala-OH	Amino acid and Its metabolites	Small Peptide	-	95924.4	168204	160882	153369	253643	100683	210151	216562	363936	115803	105259	214211	1.0159	0.304388	1.31437	0.394375	insig
MEDN1805	C16H30O2	FFA(16:1)	FA	FFA	373-49-9	463459	76067.6	485589	350743	118528	87974.8	163050	104590	151297	218569	105130	118015	1.01398	0.189079	0.543903	-0.878578	insig
MW0013036	C16H22O3	2-(3,7-dimethylocta-2,6-dien-1-yl)benzene-1,3,5-triol	Others	Others	-	19652.9	103123	144225	189858	122969	328151	49835	1.76244e+06	197008	130963	80134.4	846172	1.01398	0.254661	3.37734	1.75589	up
MEDN2050	C15H10O4	Daidzein	Benzene and substituted derivatives	Benzene and substituted derivatives	486-66-8	745802	520907	643032	719782	822418	658632	444401	779102	694036	943046	920290	1.08049e+06	1.01332	0.253908	1.18265	0.242021	insig
MEDN0753	C20H32O3	(±)16-HETE	FA	Oxidized lipids	128914-46-5	3.85581e+06	6.94897e+06	3.53892e+06	7.5407e+06	5.6654e+06	9.34348e+06	4.49778e+06	6.52811e+06	7.33085e+06	3.48565e+06	770146	6.352e+06	1.011	0.352023	0.785089	-0.349071	insig
MW0143834	C27H40O2	6-Geranylgeranyl-2-methylbenzene-1,4-diol	Benzene and substituted derivatives	Benzene and substituted derivatives	-	248446	212446	330144	630231	450851	194377	354272	408980	252369	209953	84315.6	190093	1.01071	0.289788	0.725859	-0.462238	insig
MW0146275	C14H25N3O7	Asp-Thr-Ile	Amino acid and Its metabolites	Small Peptide	-	1.5699e+06	709668	931071	2.10019e+06	1.54734e+06	1.10317e+06	2.71004e+06	1.63653e+06	2.01539e+06	972471	768205	3.07827e+06	1.01045	0.248588	1.4044	0.489951	insig
MW0108880	C9H20N4O2	Nomegapropyl-L-arginine	Amino acid and Its metabolites	Amino acid derivatives	137361-05-8	150376	121163	286762	242279	203287	130618	181675	251441	95330	422435	535371	176029	1.00817	0.274188	1.46523	0.551125	insig
MEDN1416	C18H30O3	9(S)-HOTrE	FA	Oxidized lipids	89886-42-0	563692	25857.2	502376	602940	236002	82894.9	152031	106020	124505	333506	13106.6	113910	1.00786	0.127235	0.418659	-1.25615	down
MW0004585	C17H24O	4-Acetyl-6-tert-butyl-1,1-dimethylindane	Benzene and substituted derivatives	Benzene and substituted derivatives	-	2.14372e+06	557056	1.73306e+06	1.73244e+06	1.59059e+06	422149	2.00441e+06	1.1017e+06	1.15217e+06	2.71318e+06	887580	3.2401e+06	1.00615	0.344298	1.35703	0.440449	insig
MW0143981	C11H21NO4S	7-Mercaptoheptanoylthreonine	Amino acid and Its metabolites	Amino acid derivatives	-	63412.5	32354	197640	1.02712e+06	420224	1.10908e+06	167582	248668	105242	110445	38918.8	90686.9	1.00593	0.136865	0.267224	-1.90388	down
MW0157111	C7H5NaO3	Sodium salicylate	Benzene and substituted derivatives	Benzene and substituted derivatives	54-21-7	464003	512096	467241	562808	341619	145681	549974	344150	393157	636851	875581	400314	1.00514	0.279582	1.28337	0.359941	insig
MW0011898	C19H36O5	1,2-Dioctanoyl-sn-glycerol	GL	DG	60514-48-9	555263	1.17537e+06	1.06629e+06	1.30092e+06	1.66759e+06	726780	1.14049e+06	1.52152e+06	908176	682232	170983	533383	1.0031	0.337225	0.763497	-0.389305	insig
MW0012184	C20H32O3	12(S)-HETE	FA	Oxidized lipids	54397-83-0	2.35056e+06	5.4748e+06	2.17608e+06	1.00049e+07	2.93155e+06	3.83135e+06	2.36745e+06	3.64374e+06	4.84195e+06	3.61175e+06	1.75674e+06	2.43999e+06	1.00136	0.335496	0.697129	-0.520503	insig
MEDN1247	C5H7NO3	1-pyrroline-4-hydroxy-2-carboxylate	Heterocyclic compounds	Heterocyclic compounds	9054-77-7	114778	112759	28006.7	137504	106929	88961.8	129019	160044	89016.4	98848.2	122090	101790	1.00119	0.345102	1.18995	0.250898	insig
MEDN1656	C5H10N2O3	Hydroxypiperazic acid	Heterocyclic compounds	Heterocyclic compounds	-	1.30184e+06	657293	627478	1.1061e+06	791407	684642	633404	513636	1.44583e+06	1.42987e+06	1.197e+06	2.37352e+06	1.00022	0.217644	1.46906	0.554898	insig
MEDP1260	C56H80O2	Menadione-9	Benzene and substituted derivatives	Benzene and substituted derivatives	523-39-7	1.74007e+08	1.56734e+08	7.85717e+06	192542589	2.2113e+08	3.32029e+08	1.90421e+08	233798200	3.79407e+08	9.73992e+07	3.22294e+08	2.26069e+08	0.999256	0.326669	1.3367	0.41868	insig
MEDP0118	C8H9NO4	4-Pyridoxic Acid	Heterocyclic compounds	Pteridines and derivatives	82-82-6	1.01746e+06	2.34511e+06	2.26556e+06	1.97591e+06	3.46252e+06	1.07858e+06	2.92271e+06	2.70472e+06	4.35966e+06	1.27394e+06	1.47096e+06	3.04371e+06	0.998325	0.333282	1.29893	0.377326	insig
MEDN1429	C20H30O4	Prostaglandin B2	FA	Oxidized lipids	13367-85-6	8.42107e+06	4.94592e+06	6.33226e+06	1.17648e+07	4.53022e+06	4.40435e+06	4.26178e+06	9.83496e+06	3.32799e+06	6.51965e+06	3.58075e+06	4.75914e+06	0.997855	0.403758	0.799143	-0.323474	insig
MEDN1934	C10H19N3O4	Val-Gln	Amino acid and Its metabolites	Small Peptide	42854-54-6	168017	246977	64382.4	188956	280855	224004	156288	295567	370710	144249	142592	850177	0.997669	0.302362	1.6703	0.740107	insig
MW0107891	C21H31N3O5	Lisinopril	Heterocyclic compounds	Heterocyclic compounds	76547-98-3	43957.3	100619	98481	94871.8	352852	436487	91232.9	146051	127530	41717.9	31655.4	111530	0.995849	0.216748	0.487654	-1.03607	insig
MEDP1161	C4H10N3O5P	Creatine phosphate	Nucleotide And Its metabolites	Nucleotide And Its metabolites	67-07-2	518832	293899	542955	2.00625e+06	705617	123142	781900	916881	1.2004e+07	252208	1.05888e+06	530754	0.995847	0.364665	3.70933	1.89116	insig
MW0138022	C18H20O6	Duartin	Heterocyclic compounds	Heterocyclic compounds	52305-04-1	176176	317341	767279	534674	802274	5.76664e+06	441069	334269	322456	872289	369814	164005	0.995334	0.319186	0.299353	-1.74008	insig
MEDP1221	C25H54NO6P	PC(O-16:0/O-1:0)	GP	PC O	-	1.02416e+07	3.085e+06	382766	1.11625e+06	995763	909665	1.35937e+06	8.01726e+06	1.37305e+07	698544	6.83171e+06	2.29568e+06	0.994799	0.319004	1.96838	0.977012	insig
MEDP2336	C6H11NO4	O-Acetyl-L-homoserine	Amino acid and Its metabolites	Amino acid derivatives	250736-84-6	262768	533813	320913	473286	631209	608787	445090	905992	942383	306816	392323	785562	0.994453	0.260763	1.33468	0.416489	insig
MEDN1689	C12H24N2O3	Leu-Ile	Amino acid and Its metabolites	Small Peptide	36077-41-5	533062	141236	421100	493284	380217	122193	489040	290730	271484	702819	235899	867078	0.993987	0.346324	1.3663	0.450269	insig
MEDP2319	C11H21N3O3	Pro-Lys	Amino acid and Its metabolites	Small Peptide	71227-70-8	2.63558e+06	1.1269e+06	1.56658e+06	2.06826e+06	3.60833e+06	1.50429e+06	4.45492e+06	2.1705e+06	2.34984e+06	2.1621e+06	1.08167e+06	4.29351e+06	0.993583	0.338935	1.31995	0.400487	insig
MW0015313	C19H22O3	8-Geranyl-7-hydroxycoumarin	Benzene and substituted derivatives	Benzene and substituted derivatives	23660-05-1	7.60449e+06	625335	3.58609e+06	5.34443e+06	1.0573e+07	1.1398e+06	7.91711e+06	1.14115e+07	1.45297e+07	8.73169e+06	626991	6.80473e+06	0.993374	0.18594	1.73246	0.792824	insig
MW0149874	C11H22N6O4	Gln-Arg	Amino acid and Its metabolites	Small Peptide	-	184774	183619	124353	180309	151528	157783	158996	165283	176893	224489	201586	157398	0.991349	0.273004	1.10411	0.142889	insig
MEDP1346	C24H50NO7P	LPC(0:0/16:0)	GP	LPC	-	9.78438e+06	3.0255e+06	394594	1.05915e+06	1.04694e+06	791877	1.32666e+06	7.99732e+06	1.33088e+07	660502	6.50243e+06	2.1611e+06	0.990688	0.314119	1.98459	0.988843	insig
MEDP0338	C24H50NO7P	LPC(16:0/0:0)	GP	LPC	17364-16-8	9.78438e+06	3.0255e+06	394594	1.05915e+06	1.04694e+06	791877	1.32666e+06	7.99732e+06	1.33088e+07	660502	6.50243e+06	2.1611e+06	0.990688	0.314119	1.98459	0.988843	insig
MEDP2566	C11H14N2O4	Tyr-Gly	Amino acid and Its metabolites	Small Peptide	673-08-5	5.90681e+06	2.05348e+06	4.5942e+06	7.53923e+06	5.3837e+06	1.44476e+06	6.6045e+06	4.43752e+06	4.4748e+06	5.17816e+06	3.17441e+06	8.93363e+06	0.98994	0.456774	1.21844	0.285033	insig
MEDP2263	C10H13N3O	4-Hydroxydebrisoquine	Benzene and substituted derivatives	Benzene and substituted derivatives	59333-79-8	297911	279294	340316	194618	300281	410381	199939	685340	529567	476225	250357	326398	0.988244	0.229009	1.35387	0.437084	insig
MW0013302	C27H46O2	24S-Hydroxycholesterol	Hormones and hormone related compounds	Hormones and hormone related compounds	474-73-7	1.20947e+06	417491	606859	1.45508e+07	1.50326e+06	626740	585309	1.04817e+06	2.22908e+06	1.42298e+06	41861.6	447973	0.9882	0.384762	0.305339	-1.71152	insig
MEDN0554	C8H10O2	2-(4-Hydroxyphenyl)ethanol	Benzene and substituted derivatives	Benzene and substituted derivatives	501-94-0	1.82254e+07	5.29674e+06	8.23688e+06	7.61892e+06	7.07779e+06	1.23195e+06	2.12977e+07	3.36806e+06	7.97187e+06	1.48945e+07	2.03083e+07	5.98336e+06	0.987951	0.288635	1.54807	0.630468	insig
MW0016924	C49H84O2	CE(22:2(13Z,16Z))	FA	Others	-	2.23872e+06	2.59242e+07	222163	7.4715e+06	6.94742e+06	7.61238e+06	2.9923e+07	4.43084e+06	1.11439e+07	2.93097e+06	2.65009e+07	5.40023e+06	0.986934	0.434622	1.59333	0.672044	insig
MEDP1723	C5H10N2O	3-Amino-2-piperidinone	Heterocyclic compounds	Heterocyclic compounds	1892-22-4	1.74551e+06	1.18571e+06	522067	830264	810988	1.12288e+06	1.23684e+06	1.56016e+06	997814	945197	1.24047e+06	1.27626e+06	0.986103	0.400519	1.16716	0.223005	insig
MEDP1864	C11H21N3O4	Gly-Leu-Ala	Amino acid and Its metabolites	Small Peptide	-	2.36068e+06	1.71602e+06	4.06396e+06	4.93415e+06	4.1158e+06	1.90247e+06	4.95748e+06	3.61852e+06	2.38588e+06	3.14359e+06	3.21433e+06	4.25009e+06	0.984479	0.550793	1.12972	0.175969	insig
MEDP2463	C16H19N3O3	Trp-Pro	Amino acid and Its metabolites	Small Peptide	38136-75-3	989578	378577	476528	690481	461690	375875	1.15241e+06	575288	807133	616596	517673	495025	0.984211	0.372508	1.23465	0.304098	insig
MW0128408	C16H28O2	(Z)-7-Hexadecen-1,16-olide	Heterocyclic compounds	Heterocyclic compounds	-	2.26564e+06	325831	1.19926e+06	2.4598e+06	1.13031e+06	515801	1.19579e+06	230202	1.38332e+06	1.62119e+06	104931	661780	0.984072	0.334807	0.658155	-0.6035	insig
MEDN2135	C10H18N2O5S	γ-Glu-Met	Amino acid and Its metabolites	Small Peptide	17663-87-5	885203	122722	13895.1	67800.9	18699.6	39128.5	1.03772e+06	74437.2	142058	41091.6	759503	74204.6	0.983271	0.484453	1.85543	0.891755	insig
MEDN1394	C7H6O3	3-Hydroxybenzoic Acid	Organic acid And Its derivatives	Organic acid And Its derivatives	99-06-9	2.03076e+07	5.4607e+06	8.03777e+06	8.37899e+06	7.12875e+06	1.3892e+06	2.2029e+07	3.47676e+06	8.75215e+06	1.58123e+07	2.09359e+07	6.38699e+06	0.983149	0.305265	1.5264	0.610133	insig
MEDN0416	C5H10N2O3	Ureidoisobutyric Acid	Organic acid And Its derivatives	Organic acid And Its derivatives	2905-86-4	137511	54148.5	128880	89849	60932.1	46519.3	82192	87204.3	25651.9	77565.4	66542.8	47040	0.98138	0.274268	0.745783	-0.423172	insig
MW0139152	C10H10N2O4	N-Hydroxy-3-[3-(hydroxyamino)-3-oxoprop-1-enyl]benzamide	Benzene and substituted derivatives	Benzene and substituted derivatives	174664-65-4	837331	2.6961e+06	3.89769e+06	5.53721e+06	4.6036e+06	1.08058e+07	2.61089e+06	3.68665e+06	4.31575e+06	1.63276e+06	1.00102e+06	2.28774e+06	0.981024	0.194548	0.547431	-0.869252	insig
MW0151570	C17H29N5O9	Ile-Ser-Asn-Asp	Amino acid and Its metabolites	Small Peptide	-	151150	101018	16500.5	31483.4	21725	23860.3	65819.5	55294.7	54842	53810.1	110495	59565.4	0.980055	0.723326	1.15645	0.209701	insig
MEDN1160	C6H13O7P	Mevalonate 5-phosphate	Organic acid And Its derivatives	Phosphoric acids	73566-35-5	310777	582250	550981	655003	624643	910936	389861	613952	757440	428399	235275	519162	0.979878	0.313703	0.81002	-0.303971	insig
MW0158941	C21H39N7O7	Val-Asp-Leu-Arg	Amino acid and Its metabolites	Small Peptide	-	583606	8.34084e+06	6.24947e+06	1.12849e+07	1.40585e+07	4.69766e+06	4.43993e+06	8.33863e+06	2.06621e+06	4.03003e+06	217977	2.66813e+06	0.978453	0.12214	0.481276	-1.05507	insig
MEDN0368	C19H40NO7P	LPE(14:0/0:0)	GP	LPE	-	4.20734e+06	1.36038e+06	5.23667e+06	4.20255e+06	4.56432e+06	655632	6.96062e+06	1.70161e+06	3.39898e+06	3.41684e+06	1.76714e+07	2.46175e+06	0.978361	0.358413	1.76059	0.816056	insig
MEDP2523	C4H6N2O	Imidazole-4-methanol	Heterocyclic compounds	Heterocyclic compounds	32673-41-9	3.28264e+06	5.14947e+06	9	4.39266e+06	6.07291e+06	4.77528e+06	6.03719e+06	3.77224e+06	4.62012e+06	3.58511e+06	6.63973e+06	4.36553e+06	0.978353	0.40276	1.22587	0.293803	insig
MEDP2474	C18H27N3O4	Phe-Ala-Leu	Amino acid and Its metabolites	Small Peptide	-	779053	167825	1.08301e+06	2.26353e+06	2.05073e+06	656412	2.17849e+06	1.62733e+06	1.09645e+06	595884	825646	2.09665e+06	0.978254	0.596788	1.20283	0.266427	insig
MEDN1909	C7H6O3	4-Hydroxybenzoic Acid	Benzene and substituted derivatives	Phenolic acids	99-96-7	1.58186e+07	4.48116e+06	6.99846e+06	6.4716e+06	6.52179e+06	1.09336e+06	1.84314e+07	2.82288e+06	6.86648e+06	1.32261e+07	1.81525e+07	5.0422e+06	0.977655	0.287375	1.55954	0.64112	insig
MEDN0460	C9H23N3O	N8-Acetylspermidine	Amino acid and Its metabolites	Amino acid derivatives	34450-15-2	17312.1	16710.7	12132.1	9923.69	27070.2	17361.3	11888.3	26561.6	22194.2	15599.1	12761.6	55098.7	0.976974	0.341335	1.43372	0.519765	insig
MEDN1915	C11H19NO10	N-ethylene glycol neuraminic acid	Amino acid and Its metabolites	Amino acid derivatives	1113-83-3	4.78403e+07	2.40888e+06	2.5282e+07	61616827	3.46807e+07	5.24657e+06	2.2382e+07	2.77424e+07	1.63031e+07	2.90895e+07	5.21306e+07	4.60471e+07	0.975843	0.809271	1.09386	0.129422	insig
MW0144246	C21H32O5	Acetoxy-8-gingerol	Benzene and substituted derivatives	Benzene and substituted derivatives	-	1.56394e+06	1.04388e+06	3.25653e+06	5.07302e+06	3.30109e+06	1.72787e+06	4.59691e+06	3.5042e+06	2.89188e+06	2.83169e+06	1.92147e+06	2.5029e+06	0.975772	0.610649	1.14297	0.192787	insig
MEDN1283	C23H42NO7P	LPE(0:0/18:3)	GP	LPE	-	139886	76260	147800	124095	538488	242261	1.41103e+06	579756	147375	252783	52418.8	229983	0.975122	0.322641	2.107	1.07519	insig
MEDN1284	C23H42NO7P	LPE(18:3/0:0)	GP	LPE	-	139886	76260	147800	124095	538488	242261	1.41103e+06	579756	147375	252783	52418.8	229983	0.975122	0.322641	2.107	1.07519	insig
MW0119308	C24H22N4O2	3-[1-(3-Aminopropyl)-1H-indol-3-yl]-4-(1-methyl-1H-indol-3-yl)-1H-pyrrole-2,5-dione	Aldehyde,Ketones,Esters	Ketones	125313-65-7	6.48409e+06	8.6737e+06	1.97395e+07	3.18135e+07	2.10381e+07	4.4317e+07	1.25635e+07	1.95503e+07	2.0656e+07	9.46694e+06	4.42852e+06	1.26833e+07	0.974355	0.209718	0.600826	-0.73498	insig
MW0152468	C34H45N5O9	Leu-Pro-Glu-Phe-Tyr	Amino acid and Its metabolites	Small Peptide	-	1.16472e+06	114214	410672	228926	399216	130324	807822	309652	448469	487220	237397	529022	0.972844	0.739673	1.15176	0.203838	insig
MW0115334	C17H24O9	Syringin	Heterocyclic compounds	Heterocyclic compounds	118-34-3	39488.5	84597.8	189096	151830	171825	1.17116e+06	115509	81911	69619	203227	85889.4	56434.1	0.97043	0.30958	0.338822	-1.5614	insig
MW0161394	C13H20O2	(E)-4-(4-hydroxy-2,6,6-trimethylcyclohex-2-en-1-yl)but-3-en-2-one	Aldehyde,Ketones,Esters	Ketones	-	68509.1	82399.5	38416.5	81931.7	51425.4	82726.8	50253.6	54673.1	61062.7	69388.1	65705.5	46275.3	0.969684	0.29223	0.856809	-0.222954	insig
MEDP2605	C15H23N3O4	Lys-Tyr	Amino acid and Its metabolites	Small Peptide	35978-98-4	3.99182e+06	991380	1.28798e+06	2.84809e+06	2.51929e+06	1.19614e+06	2.70314e+06	2.86896e+06	2.66769e+06	1.31312e+06	1.58882e+06	7.44204e+06	0.969391	0.380113	1.44793	0.533993	insig
MEDP0409	C5H10N2O3S	Cys-Gly	Amino acid and Its metabolites	Small Peptide	19246-18-5	3877.53	19284.2	3953.45	15823.3	6941.43	6480.34	3191.03	7050.4	5170.15	11634.4	2082.18	8216.88	0.966305	0.327206	0.662614	-0.59376	insig
MEDP1093	C5H4N4O	Allopurinol	Nucleotide And Its metabolites	Nucleotide And Its metabolites	315-30-0	2.47949e+06	796712	508913	1.49625e+06	1.51247e+06	1.86137e+06	1.71445e+06	8.62533e+06	884957	588055	3.15862e+06	2.36134e+06	0.966202	0.292631	2.00258	1.00186	insig
MEDN0418	C14H17NO8	Acetaminophen Glucuronide	Alcohol and amines	Amines	16110-10-4	91169.9	18164.5	18997.4	38864.4	35070.8	22192.2	42790.7	56711.6	23742.7	23295	98082.8	51259.4	0.965152	0.473132	1.3182	0.39857	insig
MEDP2538	C9H11NO3	3-Hydroxy-L-phenylalanine	Amino acid and Its metabolites	Amino acid derivatives	587-33-7	1.15368e+06	477929	626471	597290	473703	253216	760821	626550	561703	660154	927051	610708	0.963208	0.508773	1.15764	0.211181	insig
MW0154355	C18H27NO5	Nemorensine	Aldehyde,Ketones,Esters	Ketones	50906-96-2	1.2341e+07	2.69234e+06	8.46581e+06	1.39688e+07	5.86101e+06	4.04505e+06	6.70402e+06	5.36926e+06	7.13026e+06	9.05349e+06	1.08535e+06	3.40929e+06	0.96117	0.296153	0.691342	-0.532528	insig
MEDP1473	C6H10O3	DL-Mevalonic-Acid-Lactone	Aldehyde,Ketones,Esters	Esters	674-26-0	1.01532e+07	640282	1.74488e+07	970900	1.69986e+06	249259	660015	392254	2.03531e+06	3.58763e+06	613436	519881	0.960978	0.238574	0.250576	-1.99668	insig
MW0006883	C24H38O4	Dioctyl phthalate	Benzene and substituted derivatives	Benzene and substituted derivatives	117-81-7	2.69427e+06	7.07106e+07	239853	1.24871e+07	9.71468e+06	1.68072e+07	6.89931e+07	7.07157e+06	2.32842e+07	4.43086e+06	5.60885e+07	9.14713e+06	0.960966	0.55958	1.50031	0.58526	insig
MW0014360	C23H34O3	4,5-Epoxy-7Z,10Z,13Z,16Z,19Z-docosapentaenoic acid,methyl ester	Organic acid And Its derivatives	Organic acid And Its derivatives	121818-29-9	129816	1.64615e+06	25721	124275	2.13884e+06	5.72809e+06	344094	7.1333e+06	1.06637e+07	2.4643e+06	298379	282833	0.959239	0.373046	2.16347	1.11335	insig
MW0107328	C17H28N6O4	His-Pro-Lys	Amino acid and Its metabolites	Small Peptide	-	1.11535e+06	2.35474e+06	1.10814e+06	1.74471e+06	4.03654e+06	1.02272e+06	1.10004e+06	2.06295e+06	1.70042e+06	694774	662802	1.56851e+06	0.958959	0.294712	0.684356	-0.54718	insig
MW0014037	C39H58N4O5	3-hexanoyl-NBD Cholesterol	Hormones and hormone related compounds	Hormones and hormone related compounds	-	311011	5964.11	160344	535936	341821	84853.1	347399	259936	416054	191400	178594	144021	0.956637	0.861898	1.0677	0.0944996	insig
MEDP0150	C10H12N4O4	2'-Deoxyinosine	Nucleotide And Its metabolites	Nucleotide And Its metabolites	890-38-0	1.0984e+07	2.49766e+06	1.54942e+06	6681350	4.81195e+06	7.78022e+06	6.50123e+06	2.93879e+07	3.33913e+06	2.10025e+06	1.31283e+07	1.03332e+07	0.95461	0.283665	1.88867	0.917368	insig
MEDN1446	C20H36O3	11-HEDE	FA	Oxidized lipids	5598-37-8	779378	1.05527e+06	1.02259e+06	1.19472e+06	1.11013e+06	966268	784430	2.05369e+06	566054	660760	265500	1.10368e+06	0.954494	0.675427	0.886717	-0.173455	insig
MEDN1447	C20H36O3	15-HEDE	FA	Oxidized lipids	77159-57-0	779378	1.05527e+06	1.02259e+06	1.19472e+06	1.11013e+06	966268	784430	2.05369e+06	566054	660760	265500	1.10368e+06	0.954494	0.675427	0.886717	-0.173455	insig
MEDP1389	C25H49NO4	Carnitine C18:0	FA	CAR	-	582091	689030	504763	812626	350557	550872	506511	363720	1.04276e+06	360611	565192	300964	0.954166	0.662693	0.89966	-0.152548	insig
MEDP0669	C6H6ClN	3-Chloroaniline	Benzene and substituted derivatives	Benzene and substituted derivatives	108-42-9	5.01027e+06	5.60948e+06	4.27906e+06	5.34979e+06	5.10688e+06	5.11211e+06	5.26888e+06	5.06632e+06	5.29952e+06	5.17729e+06	5.4639e+06	5.35792e+06	0.951441	0.349016	1.03828	0.0541936	insig
MW0012079	C19H30O3	11beta-Hydroxyetiocholanolone	Aldehyde,Ketones,Esters	Ketones	739-26-4	623994	641577	430135	1.6432e+06	1.00942e+06	1.03646e+06	1.73878e+06	1.58288e+06	1.12869e+06	2.64536e+06	329397	823243	0.950617	0.239031	1.53179	0.615217	insig
MEDP2524	C4H11NS	3-Methylthiopropylamine	Alcohol and amines	Amines	4104-45-4	120114	647855	175951	312359	371010	626117	344422	415999	9	172387	217452	131735	0.94991	0.173406	0.568918	-0.813706	insig
MEDN0818	C5H9NO3	N-acetyl-beta-alanine	Amino acid and Its metabolites	Amino acid derivatives	3025-95-4	203708	511690	206518	182457	151932	305708	356705	417269	203552	238777	534453	226803	0.948895	0.38487	1.26603	0.340314	insig
MEDP1183	C7H16N2O	N-Acetylcadaverine	Alcohol and amines	Polyamines	32343-73-0	2.0091e+06	262259	320905	852568	1.17045e+06	2.74148e+06	4.2077e+06	1.52633e+06	8.14937e+06	341417	476321	2.65207e+06	0.948465	0.237073	2.35881	1.23806	insig
MEDP1771	C8H15N3O4	Ala-gln	Amino acid and Its metabolites	Small Peptide	39537-23-0	670799	442652	477294	719216	941085	406234	907981	797045	1.73884e+06	334082	316456	2.5905e+06	0.946875	0.228567	1.82784	0.870137	insig
MW0112268	C19H28O10	2-Phenylethyl 6-O-pentopyranosylhexopyranoside	Benzene and substituted derivatives	Benzene and substituted derivatives	-	1.09562e+06	285531	621903	1.50452e+06	1.8239e+06	483262	1.31762e+06	1.2944e+06	1.80684e+06	1.56001e+06	349367	1.14237e+06	0.945212	0.410949	1.28477	0.361516	insig
MW0155623	C21H22O5	Pleurotin	Benzene and substituted derivatives	Benzene and substituted derivatives	1404-23-5	1.0595e+07	1.22666e+06	1.09873e+07	8.70044e+06	2.52679e+06	1.57866e+06	3.87737e+06	1.93254e+06	2.9079e+06	4.82981e+06	1.60584e+06	2.45062e+06	0.945103	0.178979	0.49429	-1.01657	insig
MW0149974	C16H28N4O7	Glu-Gln-Ile	Amino acid and Its metabolites	Small Peptide	-	55881.4	83957.5	82217	399509	322970	112404	638026	400602	260650	41453.6	64872.4	672517	0.945077	0.217499	1.96617	0.975388	insig
MW0155031	C22H45O9P	PG(16:0/0:0)[U]	Heterocyclic compounds	Heterocyclic compounds	-	6.4412e+06	6.75896e+06	6.20388e+06	6.07057e+06	6.17165e+06	6.29147e+06	6.38521e+06	6.13393e+06	6.30241e+06	6.47782e+06	6.12563e+06	5.79238e+06	0.944336	0.417197	0.981012	-0.0276574	insig
MEDP0180	C11H15N2O8P	Β-Nicotinamide Mononucleotide	Nucleotide And Its metabolites	Nucleotide And Its metabolites	1094-61-7	103181	12400	139703	126340	140043	51504.8	117662	123568	87529.1	116505	46540.4	216822	0.943905	0.489011	1.23633	0.306059	insig
MW0123214	C15H12N2O	Carbamazepine	Heterocyclic compounds	Heterocyclic compounds	298-46-4	3.84614e+06	3.14771e+06	3.51128e+06	3.74512e+06	3.2224e+06	2.98454e+06	3.48336e+06	3.49353e+06	3.40871e+06	3.85554e+06	3.50658e+06	3.64872e+06	0.943046	0.348236	1.04591	0.0647641	insig
MW0114039	C42H67NO16	Carbomycin	Heterocyclic compounds	Heterocyclic compounds	4564-87-8	1.77363e+06	275766	323321	261979	388487	142077	918615	306104	706119	762581	267098	751869	0.942449	0.749351	1.17285	0.230024	insig
MEDN1954	C7H14N2O3	Val-Gly	Amino acid and Its metabolites	Small Peptide	686-43-1	713380	471674	215973	477971	682483	687148	374593	961538	587142	413477	598592	1.59574e+06	0.94082	0.3312	1.39477	0.480026	insig
MEDN1875	C6H8O7	(+)-Ds-Threo-Isocitrate	Organic acid And Its derivatives	Organic acid And Its derivatives	20226-99-7	9469.83	22021.6	13959.8	20734.5	29993	21784.9	16082.3	8111.37	33281.1	10077.7	3241.24	26714.3	0.940285	0.556191	0.826594	-0.27475	insig
MEDP0052	C3H7NO2S	L-Cysteine	Amino acid and Its metabolites	Amino acids	52-90-4	6.70727e+07	1.01976e+08	8.1889e+07	9.08413e+07	8.13311e+07	8.92298e+07	7.33022e+07	6.8424e+07	7.74857e+07	7.47106e+07	8.26116e+07	9.8331e+07	0.939492	0.353623	0.926856	-0.109583	insig
MW0012338	C16H32O3	13-Hydroxyhexadecanoic acid	FA	Oxidized lipids	-	280266	945156	449070	852298	303112	437314	978023	434760	375322	538900	3.28556e+06	510883	0.939439	0.357966	1.87421	0.906282	insig
MW0156782	C19H33N9O7	Ser-His-Thr-Arg	Amino acid and Its metabolites	Small Peptide	-	2.20832e+06	1.97661e+07	135352	3.79004e+06	5.00478e+06	1.69598e+07	1.16763e+07	5.60703e+06	1.16325e+07	2.63696e+06	1.53166e+07	6.83516e+06	0.939423	0.808258	1.12201	0.16609	insig
MEDP0047	C5H9N3	Histamine	Alcohol and amines	Polyamines	51-45-6	2.91322e+07	1.12473e+07	3.13281e+07	1.43033e+07	2.58145e+07	1.02865e+07	2.75588e+07	2.33798e+07	9.69522e+06	3.01721e+07	2.99453e+07	2.6159e+07	0.938344	0.426325	1.20308	0.266731	insig
MW0063834	C16H26O3	Tetranor 12-HETE	FA	Oxidized lipids	121842-79-3	672412	1.15942e+06	840124	503494	1.05566e+06	904420	990339	2.02794e+06	1.08807e+06	751303	513608	1.38469e+06	0.937642	0.295088	1.31553	0.395645	insig
MEDN1900	C24H40O3	Isolithocholic acid	Bile acids	Bile acids	1534-35-6	6.90815e+06	2.61977e+08	2.61053e+07	3.40889e+07	7.4991e+07	2.27836e+08	2.18068e+07	6.80212e+07	2.65642e+07	2.52017e+07	3.73671e+07	1.78568e+07	0.935302	0.171939	0.311467	-1.68285	insig
MEDP2391	C14H18N2O6	Tyr-Glu	Amino acid and Its metabolites	Small Peptide	2545-89-3	1.48723e+06	424719	1.7772e+06	1.29572e+06	956806	279931	1.6964e+06	933922	871807	1.4548e+06	766820	1.68619e+06	0.934371	0.523951	1.191	0.252177	insig
MW0123364	C40H38N2O11	Citbismine D	Heterocyclic compounds	Heterocyclic compounds	-	1.02399e+06	340240	389167	1.40035e+06	425114	7820.8	660107	135243	583083	567047	3.00681e+06	1.29495e+06	0.933709	0.376037	1.74179	0.800568	insig
MEDN0822	C13H22N4O8S2	Cysteine-glutathione disulfide	Amino acid and Its metabolites	Small Peptide	13081-14-6	5599.71	4819.2	870.319	6221.88	9	6441.32	3472.12	7114.51	10038.7	7970.89	2728.35	7954.7	0.932638	0.149969	1.63927	0.713052	insig
MEDN0383	C18H32O2	FFA(18:2)	FA	FFA	60-33-3	555258	167270	328880	494826	274327	204254	353610	279491	134942	335768	191439	221030	0.931412	0.279585	0.748849	-0.417254	insig
MW0146056	C14H23N3O8	Asp-Asp-Leu	Amino acid and Its metabolites	Small Peptide	-	710117	4.39615e+06	5.81269e+06	6.92115e+06	7.06998e+06	1.22067e+07	3.78264e+06	4.91313e+06	3.97386e+06	2.21484e+06	987208	3.20159e+06	0.930819	0.113601	0.513873	-0.960517	insig
MW0009837	C20H28N2O5S	Tamsulosin	Benzene and substituted derivatives	Benzene and substituted derivatives	106133-20-4	1.31348e+06	8.57588e+06	367041	2.9703e+06	2.66363e+06	3.19033e+06	9.06357e+06	2.1917e+06	3.76802e+06	1.56172e+06	7.79031e+06	2.44824e+06	0.930638	0.47636	1.4058	0.491389	insig
MW0147041	C28H48O	Campest-4-en-3beta-ol	Alcohol and amines	Alcohols	-	3.13073e+07	1.05446e+07	1.51973e+07	2.70522e+08	3.68753e+07	1.52995e+07	1.52596e+07	2.6015e+07	5.83407e+07	3.7904e+07	851816	1.23928e+07	0.9295	0.407384	0.397013	-1.33274	insig
MW0134380	C56H42O9	5-{4-[(E)-2-{3-[3-(3,5-dihydroxyphenyl)-6-hydroxy-2-phenyl-2,3-dihydro-1-benzofuran-4-yl]-2-phenyl-2,3-dihydro-1-benzofuran-5-yl}ethenyl]-6-hydroxy-2-phenyl-2,3-dihydro-1-benzofuran-3-yl}benzene-1,3-diol	Benzene and substituted derivatives	Benzene and substituted derivatives	-	855518	146874	184581	224352	180963	51582.4	190227	179419	435355	237013	806527	279839	0.929101	0.611687	1.29474	0.37266	insig
MW0104207	C10H18O3	10-hydroxy-2E-decenoic acid	Organic acid And Its derivatives	Organic acid And Its derivatives	-	413392	341806	118002	157177	429884	308231	1.00607e+06	179731	328964	243862	1.24173e+06	181773	0.928155	0.282246	1.79935	0.847475	insig
MEDP0507	C9H8O3	2-Hydroxycinnamic acid	Benzene and substituted derivatives	Phenolic acids	614-60-8	3.24195e+07	1.34052e+07	1.5375e+07	1.84249e+07	1.44027e+07	7.04037e+06	2.24848e+07	1.72715e+07	1.463e+07	1.94655e+07	2.63102e+07	1.63987e+07	0.927859	0.527216	1.15329	0.205757	insig
MEDN0062	C5H9NO3	N-Propionylglycine	Amino acid and Its metabolites	Amino acids	21709-90-0	2.57775e+06	1.02478e+06	583443	930892	743722	523756	1.43007e+06	1.14806e+06	824521	1.11034e+06	1.85887e+06	1.04753e+06	0.927662	0.633036	1.16212	0.216764	insig
MEDN1306	C5H8N2O5	Ureidosuccinic acid	Amino acid and Its metabolites	Amino acid derivatives	13184-27-5	324736	88674.3	405365	424157	133511	23713.2	579832	328054	62297.9	692838	909862	82170.4	0.927097	0.221644	1.89626	0.923155	insig
MW0152569	C15H29N3O5	Leu-Val-Thr	Amino acid and Its metabolites	Small Peptide	-	5.55651e+06	2.03599e+06	2.10937e+06	9.26677e+06	2.01329e+06	4.13615e+06	1.211e+07	9.29099e+06	4.73469e+06	1.1746e+06	4.01289e+06	1.13753e+07	0.926307	0.209281	1.69991	0.76546	insig
MW0122526	C25H26N4O4	7-Nitro-10-octyl-3-phenyl-pyrimido[4,5-b]quinoline-2,4(3H,10H)-dione	Aldehyde,Ketones,Esters	Ketones	137346-42-0	1.6702e+06	8.86789e+06	226499	3.10848e+06	2.90397e+06	4.15851e+06	380450	1.7187e+06	347970	1.63613e+06	8.12366e+06	585687	0.925593	0.448456	0.611047	-0.710646	insig
MEDN0769	C22H32O3	14(S)-HDHA	FA	Oxidized lipids	119433-37-3	1.24718e+07	1.81739e+06	6.57526e+06	2.5474e+07	2.30033e+07	9.84326e+06	2.36118e+07	1.73675e+07	1.02645e+07	1.61097e+07	6.52618e+06	1.5065e+07	0.92514	0.726489	1.12325	0.167684	insig
MW0156128	C35H60N4O6S	Prostaglandin F2-biotin	Hormones and hormone related compounds	Hormones and hormone related compounds	-	1.11752e+06	263781	437430	4.72481e+06	2.54721e+06	893458	2.72379e+06	4.43673e+06	1.94265e+06	3.11447e+06	232915	1.93858e+06	0.923303	0.435125	1.44119	0.527261	insig
MEDN0211	C5H12O5	D-Arabitol	Carbohydrates and Its metabolites	Sugar alcohols	488-82-4	588065	148206	915633	364009	510928	253036	216364	296387	467129	309915	154559	404236	0.919772	0.243596	0.66499	-0.588595	insig
MEDN1018	C5H12O5	Ribitol	Carbohydrates and Its metabolites	Sugar alcohols	488-81-3	588065	148206	915633	364009	510928	253036	216364	296387	467129	309915	154559	404236	0.919772	0.243596	0.66499	-0.588595	insig
MW0155975	C15H23N3O6	Pro-Pro-Glu	Amino acid and Its metabolites	Small Peptide	-	234426	781020	487613	558770	736659	1.52319e+06	876201	948786	921855	608071	876984	567487	0.919404	0.6917	1.11054	0.151259	insig
MW0126353	C11H11NO	Pyroquilon	Aldehyde,Ketones,Esters	Ketones	57369-32-1	3.67591e+06	35236.1	1.76509e+06	945808	348383	51508.9	255309	183157	385233	337385	35576.2	158032	0.918386	0.173908	0.198579	-2.33221	insig
MW0122845	C11H18N2O3	Amobarbital	Heterocyclic compounds	Heterocyclic compounds	57-43-2	915152	36009.5	1.13988e+06	1.11057e+06	587373	21914.5	648177	19625.2	23368.4	891283	6201.08	281547	0.917284	0.242056	0.49075	-1.02694	insig
MW0137109	C16H12O3	7-Methoxyisoflavone	Flavonoids	Flavonoid	1621-56-3	286265	309158	500540	528254	632528	313491	444654	533946	411889	495373	407475	435988	0.917183	0.685438	1.0619	0.0866429	insig
MEDP2358	C10H16N2O5	Pro-Glu	Amino acid and Its metabolites	Small Peptide	67644-00-2	5.52067e+06	1.43435e+06	4.25784e+06	5.96082e+06	7.49695e+06	1.53173e+06	1.00381e+07	4.12202e+06	3.28521e+06	4.86662e+06	2.94545e+06	6.06974e+06	0.916553	0.573174	1.19558	0.257716	insig
MEDP1807	C10H12O2	Thymoquinone	Benzene and substituted derivatives	Benzene and substituted derivatives	490-91-5	305416	469321	1.33592e+06	1.13212e+06	950404	577133	1.62232e+06	1.27946e+06	411936	957610	1.00685e+06	596356	0.914392	0.46952	1.23148	0.300392	insig
MW0006355	C17H20N2O3	Bifenazate	Benzene and substituted derivatives	Benzene and substituted derivatives	149877-41-8	988996	2.30789e+06	2.94593e+06	3.72829e+06	7.22173e+06	5.11506e+06	4.56591e+06	4.64236e+06	6.80255e+06	2.72294e+06	2.70981e+06	3.76527e+06	0.91289	0.669268	1.13004	0.176375	insig
MW0007555	C9H8ClNO3	m-Chlorohippuric acid	Benzene and substituted derivatives	Benzene and substituted derivatives	57728-59-3	841234	5.04417e+06	4.1695e+06	6.3746e+06	1.23927e+07	9.31807e+06	3.04225e+06	1.75323e+06	9.19006e+06	2.48654e+06	2.17529e+06	2.63829e+06	0.911806	0.196286	0.558089	-0.841434	insig
MW0103554	C8H10FN3O3S	Emtricitabine	Nucleotide And Its metabolites	Nucleotide and Its metabolites	-	2.06486e+06	847551	1.97146e+06	2.38782e+06	2.59901e+06	1.16762e+06	2.90382e+06	3.00168e+06	1.77833e+06	1.19848e+06	1.3501e+06	3.52422e+06	0.911771	0.376769	1.24626	0.317606	insig
MW0112870	C5H8O	3-Methyl-2-butenal	Aldehyde,Ketones,Esters	Aldehydes	107-86-8	75364.3	42492.4	231924	101073	179222	68560.5	76331.4	112047	94097.3	48627.5	38312.3	80196.4	0.911473	0.239867	0.643556	-0.635862	insig
MW0114197	C4H9O7P	D-Erythrose 4-phosphate	Organic acid And Its derivatives	Organic acid And Its derivatives	585-18-2	167165	805102	771705	907174	1.53783e+06	1.30495e+06	470423	832824	788360	396604	331700	433856	0.911358	0.123303	0.592248	-0.755726	insig
MEDP2371	C12H25N3O3	Lys-Ile	Amino acid and Its metabolites	Small Peptide	20556-13-2	1.24274e+06	1.45793e+06	1.35711e+06	1.63995e+06	2.65708e+06	1.42569e+06	2.23891e+06	2.54561e+06	3.62105e+06	955341	818865	5.25773e+06	0.910185	0.23748	1.5784	0.658459	insig
MW0123598	C31H24O10	Dianhydroaurasperone C	Aldehyde,Ketones,Esters	Ketones	-	101302	29651.2	37568.5	139042	119561	43260.9	68248.2	176153	26572.6	45323.8	170159	314265	0.909086	0.294343	1.70227	0.767456	insig
MEDN2000	C15H22N2O4	Ile-Tyr	Amino acid and Its metabolites	Small Peptide	38579-21-4	328016	64331.8	276868	225006	193589	61149.4	259311	140912	183615	215656	149502	495687	0.909067	0.499029	1.25738	0.330422	insig
MEDN1999	C15H22N2O4	Leu-Tyr	Amino acid and Its metabolites	Small Peptide	968-21-8	328016	64331.8	276868	225006	193589	61149.4	259311	140912	183615	215656	149502	495687	0.909067	0.499029	1.25738	0.330422	insig
MEDP0016	C5H9NO4	L-Glutamic Acid	Amino acid and Its metabolites	Amino acids	56-86-0	8.47682e+06	1.14078e+07	6.88524e+06	8.94276e+06	1.11794e+07	7.34658e+06	1.03399e+07	9.29713e+06	1.12329e+07	8.60651e+06	1.17748e+07	7.95057e+06	0.90819	0.423409	1.09151	0.12632	insig
MW0152347	C27H41N5O8	Leu-Gly-Phe-Glu-Val	Amino acid and Its metabolites	Small Peptide	-	4.63575e+06	2.77398e+07	271351	428865	3.09599e+06	1.23403e+07	1.08304e+07	1.76698e+07	1.1311e+07	1.16227e+06	8.79777e+06	4.32713e+06	0.907674	0.854956	1.11515	0.157243	insig
MW0168801	C19H22FN3O	Azaperone	Heterocyclic compounds	Heterocyclic compounds	1649-18-9	483638	249750	461850	1.0045e+06	488387	357639	684739	211565	2.43581e+06	500061	573435	968052	0.907049	0.2982	1.76431	0.819102	insig
MEDP0428	C27H46O	Cholesterol	Hormones and hormone related compounds	Hormones and hormone related compounds	57-88-5	8.87935e+06	8.16254e+06	3.51236e+06	7.65895e+06	5.44681e+06	5.93792e+06	6.29802e+06	1.19371e+07	6.95594e+06	7.34931e+06	7.74471e+06	6.29602e+06	0.906511	0.351857	1.17635	0.234319	insig
MW0055025	C21H36O4	MG(18:3(6Z,9Z,12Z)/0:0/0:0)	GL	MG	-	3.08452e+06	4.20867e+06	2.20627e+06	9.5248e+06	6.35721e+06	6.84831e+06	8.30628e+06	8.42051e+06	5.30891e+06	7.24974e+06	3.02996e+06	5.81726e+06	0.90646	0.497669	1.18315	0.242633	insig
MW0126592	C33H46N4O6	Stercobilin	Heterocyclic compounds	Heterocyclic compounds	13857-56-2	1.3212e+06	6.56129e+06	974770	4.51365e+06	3.7815e+06	1.53104e+06	4.01674e+06	2.75396e+06	3.19002e+06	2.61432e+06	1.01112e+07	1.98877e+06	0.906273	0.529394	1.32069	0.401289	insig
MEDP1467	C10H15N3O4	5-Methyl-2'-deoxycytidine	Nucleotide And Its metabolites	Nucleotide And Its metabolites	838-07-3	547272	256027	131628	132436	888588	318564	214766	985965	248364	254062	698207	486458	0.901739	0.569789	1.26964	0.344422	insig
MW0145271	C20H35N9O9	Arg-Asn-Gln-Glu	Amino acid and Its metabolites	Small Peptide	-	401129	1.86115e+06	478997	761502	1.3313e+06	1.46352e+06	1.30545e+06	1.1848e+06	1.73042e+06	743736	941356	1.3081e+06	0.901486	0.597726	1.14549	0.195971	insig
ZINC15209455	C15H26O	10-Epi-gamma-Eudesmol	Alcohol and amines	Alcohols	-	1.8394e+06	68078.4	3.56603e+06	1.47614e+06	660988	222250	770204	231516	124758	1.23313e+06	85667.7	474735	0.899932	0.195519	0.372789	-1.42357	insig
MEDP0039	C5H11NO2	Betaine	Others	Others	107-43-7	2.45331e+07	1.03201e+07	7.2203e+06	1.10777e+07	1.0535e+07	8.67371e+06	1.09628e+07	6.57998e+06	4.23548e+07	9.5246e+06	1.73228e+07	9	0.899336	0.725941	1.1988	0.261589	insig
MEDP2376	C12H25N3O3	Lys-Leu	Amino acid and Its metabolites	Small Peptide	7369-79-1	1.94487e+07	1.21355e+07	1.36407e+07	3.00958e+07	4.5442e+07	2.26175e+07	4.32643e+07	3.73809e+07	4.17427e+07	1.62307e+07	8.19925e+06	7.32931e+07	0.898845	0.265819	1.53516	0.618385	insig
MEDP2408	C7H8N2O	3-aminobenzamide	Benzene and substituted derivatives	Benzene and substituted derivatives	3544-24-9	9.76302e+06	2.85005e+06	2.18412e+06	9.40246e+06	5.98367e+06	7.86026e+06	7.03746e+06	3.43353e+07	3.43738e+06	2.60978e+06	1.43565e+07	9.8809e+06	0.897024	0.306476	1.88356	0.91346	insig
MW0062144	C22H29KO4	Potassium canrenoate	Hormones and hormone related compounds	Hormones and hormone related compounds	2181-04-6	1.19295e+07	489674	5.73952e+06	1.30463e+07	1.12696e+07	2.97181e+06	1.17954e+07	7.07286e+06	1.03324e+07	1.32257e+07	3.0519e+06	6.82467e+06	0.897021	0.674503	1.15087	0.202726	insig
MEDP0369	C8H12N2O2	Pyridoxamine	Heterocyclic compounds	Pteridines and derivatives	85-87-0	125202	1.10895e+06	47907.5	542958	553911	1.03877e+06	265970	1.67964e+06	796028	219170	635062	1.2195e+06	0.895374	0.446568	1.40895	0.49462	insig
MW0153596	C17H29N5O4S1	Met-Leu-His	Amino acid and Its metabolites	Small Peptide	-	94536	399351	364496	388626	593348	2.41305e+06	356017	266960	534030	257671	150471	240050	0.895236	0.295385	0.424413	-1.23646	insig
MEDP1868	C11H14N2O4	Gly-Tyr	Amino acid and Its metabolites	Small Peptide	658-79-7	6.31038e+06	2.27968e+06	5.09802e+06	7.47414e+06	5.98213e+06	1.53279e+06	6.79678e+06	4.8194e+06	4.49017e+06	5.1333e+06	3.22545e+06	9.78424e+06	0.893254	0.506523	1.19431	0.256175	insig
MW0117975	C6H11NO	2,5-Dihydro-2,4,5-trimethyloxazole	Heterocyclic compounds	Heterocyclic compounds	-	73392.7	80075.1	55251	71875	57618.1	65820.7	72774.3	71235.8	59279	79653.8	73271.2	78341.4	0.893119	0.326833	1.07555	0.105068	insig
MW0144117	C21H36O4	9,11-methane-epoxy PGF1	Hormones and hormone related compounds	Hormones and hormone related compounds	72517-81-8	1.90162e+06	1.42591e+06	1.51481e+06	8.33468e+06	2.7086e+06	914341	1.22302e+06	2.14799e+06	2.88252e+06	1.02275e+06	418947	2.46796e+06	0.890467	0.390618	0.604953	-0.725105	insig
MW0142823	C24H38O3	3beta,21-Dihydroxy-4,4,14-trimethyl-5alpha-pregn-8-en-20-one	Aldehyde,Ketones,Esters	Ketones	-	290447	259480	325333	644515	397921	303757	371654	308297	268230	424070	151432	291683	0.890234	0.356391	0.817198	-0.291243	insig
MW0109223	C24H32N4O4	Phe-Phe-Lys	Amino acid and Its metabolites	Small Peptide	-	1.94418e+06	146704	2.93893e+06	2.73622e+06	2.61736e+06	191065	2.48954e+06	245680	182278	1.70004e+06	40579.6	715459	0.887414	0.220058	0.508166	-0.976629	insig
MEDP2503	C13H18N2O5	Tyr-Thr	Amino acid and Its metabolites	Small Peptide	-	355290	263242	425158	434209	444945	237822	477582	473693	604511	278071	226577	637909	0.886064	0.283442	1.24885	0.320597	insig
MW0053832	C29H44O5	Hecogenin acetate	Aldehyde,Ketones,Esters	Esters	915-35-5	1.18307e+06	1.18401e+07	166092	2.19757e+06	2.90801e+06	1.00713e+07	7.66889e+06	3.45053e+06	6.68673e+06	1.3144e+06	8.79452e+06	3.75229e+06	0.881866	0.819669	1.11638	0.158822	insig
MEDP0831	C3H9NO	1-Aminopropan-2-ol	Alcohol and amines	Alcohols	78-96-6	3.73106e+06	5.2803e+06	4.65824e+06	5.16913e+06	4.26289e+06	5.06622e+06	3.81053e+06	3.88012e+06	4.34108e+06	4.15936e+06	4.46481e+06	5.65712e+06	0.879112	0.421955	0.934151	-0.0982721	insig
MEDP0084	C3H9NO	Trimethylamine-N-Oxide	Alcohol and amines	Amines	1184-78-7	3.73106e+06	5.2803e+06	4.65824e+06	5.16913e+06	4.26289e+06	5.06622e+06	3.81053e+06	3.88012e+06	4.34108e+06	4.15936e+06	4.46481e+06	5.65712e+06	0.879112	0.421955	0.934151	-0.0982721	insig
MEDN0490	C4H4O4	Fumaric Acid	Organic acid And Its derivatives	Organic acid And Its derivatives	110-17-8	271170	328403	148329	278687	368879	170230	672752	215649	191270	497808	403614	161202	0.877516	0.324158	1.36827	0.452352	insig
MW0015791	C15H22O5	Anguidol	Alcohol and amines	Alcohols	-	602367	1.79386e+06	1.32466e+06	1.5389e+06	1.97167e+06	2.09861e+06	1.13135e+06	1.20006e+06	1.92765e+06	755724	876000	1.34978e+06	0.874546	0.243344	0.776045	-0.365787	insig
MEDL01909	C19H22O3	Acerogenin G	Phenolic acids	Phenolic acids	130233-83-9	57644.9	25902	214507	278853	116474	1.49325e+06	32272.7	42371.8	18064.8	161252	596679	58945.3	0.873358	0.418624	0.415975	-1.26543	insig
MEDN1226	C5H9NO3	2-amino-4-oxovaleric acid	Organic acid And Its derivatives	Organic acid And Its derivatives	4439-83-2	1.52773e+06	420362	2.13958e+06	2.57557e+06	870406	151474	1.91213e+06	1.65253e+06	693589	2.36142e+06	2.27507e+06	586466	0.872665	0.566883	1.23371	0.303002	insig
MEDN0586	C5H9NO3	N-Acetyl-L-alanine	Amino acid and Its metabolites	Amino acid derivatives	97-69-8	1.52773e+06	420362	2.13958e+06	2.57557e+06	870406	151474	1.91213e+06	1.65253e+06	693589	2.36142e+06	2.27507e+06	586466	0.872665	0.566883	1.23371	0.303002	insig
MEDN1125	C13H22N2	N,N′-dicyclohexylcarbodiimide	Alcohol and amines	Polyamines	538-75-0	2.45262e+06	2.76341e+06	2.88396e+06	3.12489e+06	2.72063e+06	3.24466e+06	2.9265e+06	2.78066e+06	2.99988e+06	3.27449e+06	3.22991e+06	2.75036e+06	0.872277	0.406543	1.04489	0.0633481	insig
MW0017122	C22H36O4	Ciprostene	Organic acid And Its derivatives	Organic acid And Its derivatives	81703-55-1	8575.09	1.23317e+07	8339.24	26674.3	254272	5.60097e+06	25909.1	244402	355298	29882.3	10424.3	25586.4	0.87008	0.216419	0.0379309	-4.72048	insig
MW0125220	C20H20N2O4	Moschamine	Heterocyclic compounds	Heterocyclic compounds	-	423159	546253	1.2064e+06	848691	2.27784e+06	2.42692e+06	1.38265e+06	2.39971e+06	777729	1.03032e+06	942104	2.01896e+06	0.86782	0.763909	1.10638	0.145843	insig
MW0149115	C22H34O5	F4-Neuroprostane(4-series)	FA	Oxidized lipids	-	891950	184965	1.66854e+06	5.45904e+06	5.14769e+06	595187	6.47026e+06	4.94544e+06	1.53998e+06	2.5657e+06	326737	2.22467e+06	0.867677	0.618622	1.29578	0.373826	insig
MW0151912	C20H24O3	Jatrophone	Aldehyde,Ketones,Esters	Ketones	29444-03-9	1.138e+06	15379.8	736561	328738	696074	29243.2	622423	832575	631165	1.02194e+06	61383.3	296173	0.863737	0.714826	1.1772	0.235354	insig
MW0138147	C17H16O5	Farrerol	Heterocyclic compounds	Heterocyclic compounds	24211-30-1	155175	556741	245686	251090	394157	526590	293119	624726	474579	373220	382571	301403	0.862787	0.540965	1.15036	0.202082	insig
MW0144885	C24H40O5	Alloavicholate	Organic acid And Its derivatives	Organic acid And Its derivatives	-	56013.8	1.22727e+06	308171	296222	77725.7	1.0536e+06	1.26074e+06	931416	560380	304864	328355	273041	0.861066	0.696122	1.21192	0.277297	insig
MEDN1931	C5H10O5	L-lyxose	Carbohydrates and Its metabolites	Carbohydrates and Its metabolites	1949-78-6	569307	1.3501e+06	553910	786225	935759	1.14846e+06	743358	1.23862e+06	1.30028e+06	644263	997016	1.38048e+06	0.860851	0.395795	1.1797	0.238417	insig
MEDP0214	C10H12N2	Tryptamine	Tryptamines,Cholines,Pigments	Tryptamines	61-54-1	25831.8	849696	79949.8	690455	117139	5.32506e+06	168879	1.11566e+06	906635	294110	1.0438e+06	2.02136e+06	0.860782	0.7815	0.783063	-0.352801	insig
MW0150910	C22H38N8O6	His-Gln-Val-Lys	Amino acid and Its metabolites	Small Peptide	-	2.37394e+06	7.17222e+06	4.87147e+06	6.05478e+06	8.54736e+06	2.44162e+07	4.58398e+06	6.92427e+06	7.48824e+06	4.00299e+06	3.63676e+06	4.34198e+06	0.860642	0.302496	0.579726	-0.786558	insig
MEDN2017	C14H16N2O3	cyclo(Pro-Tyr)	Amino acid and Its metabolites	Small Peptide	4549-02-4	24348	39207.7	43400.4	24968	55693.8	68027.5	48414.9	71410.3	41170.5	47343.6	26013.8	60254.4	0.859663	0.509023	1.15241	0.20465	insig
MEDN1035	C18H32O3	13(R)-HODE	FA	Oxidized lipids	10219-69-9	3.12485e+06	205295	2.91697e+06	2.54861e+06	945305	201660	1.234e+06	237445	746429	1.21936e+06	240083	552642	0.859169	0.154275	0.425435	-1.23299	insig
MEDP2390	C10H18N2O3	Pro-Val	Amino acid and Its metabolites	Small Peptide	52899-09-9	3.49196e+06	822791	3.43958e+06	2.36165e+06	4.0211e+06	1.73212e+06	9.03426e+06	2.16944e+06	2.41876e+06	4.22711e+06	1.0668e+06	4.42531e+06	0.859096	0.355853	1.47088	0.556679	insig
MEDP2464	C16H21N3O3S	Met-Trp	Amino acid and Its metabolites	Small Peptide	60535-02-6	119137	263371	350366	310320	281447	125345	120360	400901	263566	184285	35354.4	179484	0.856113	0.509709	0.816525	-0.29243	insig
MW0109375	C17H32N4O4	Pro-Ile-Lys	Amino acid and Its metabolites	Small Peptide	-	3.76583e+06	428860	4.86049e+06	6.20794e+06	2.58522e+06	583943	2.23891e+06	886899	813900	3.41071e+06	328331	1.51906e+06	0.855913	0.186207	0.499005	-1.00287	insig
MW0147979	C13H24N6O6S1	Cys-Arg-Asp	Amino acid and Its metabolites	Small Peptide	-	2.38453e+06	114233	297576	410692	234210	80486.2	934042	58420.1	2.02914e+06	589598	401246	1.67685e+06	0.855382	0.468068	1.61549	0.691969	insig
MW0157764	C25H41N7O6	Thr-Phe-Leu-Arg	Amino acid and Its metabolites	Small Peptide	-	1.3423e+06	513267	770656	1.04412e+06	688180	317477	851407	480457	589434	897285	7.7211e+06	810995	0.854924	0.386805	2.42743	1.27943	insig
MW0124769	C21H27N5	Mavorixafor	Others	Medicine	558447-26-0	671770	1.83844e+06	627261	831634	1.0732e+06	148358	514675	702741	484576	97655	137478	2.08775e+06	0.854332	0.618854	0.775408	-0.366973	insig
MEDP0270	C12H13NO2	3-Indolebutyric Acid	Heterocyclic compounds	Indole and Its derivatives	133-32-4	5.66631e+06	8.65198e+06	5.499e+06	5.12208e+06	5.94421e+06	8.43402e+06	6.57921e+06	7.60921e+06	6.40357e+06	7.76127e+06	6.83807e+06	7.05712e+06	0.853562	0.497031	1.07454	0.103723	insig
MW0141372	C19H37NO2	13-Azaprostanoic acid	FA	FFA	71629-07-7	1.26803e+06	736348	2.5642e+06	1.35077e+06	1.60563e+06	1.15146e+06	1.45424e+06	1.611e+06	136066	1.45216e+06	809202	1.10344e+06	0.847801	0.32312	0.756775	-0.402064	insig
MEDP1387	C26H47NO4	Carnitine C19:2	FA	CAR	-	6.75976e+06	2.66873e+06	6.34173e+06	7.55924e+06	5.86994e+06	2.46937e+06	4.69824e+06	3.0697e+06	2.78428e+06	5.39212e+06	4.06979e+06	3.73183e+06	0.847175	0.217146	0.749823	-0.415379	insig
MW0168432	C22H44NO6PS2	1,2-bis(heptanoylthio) Glycerophosphocholine	GP	PC	89019-63-6	59437.1	265483	114373	420736	674038	320121	278473	455985	355575	167362	380942	286313	0.845983	0.909477	1.038	0.0538092	insig
MW0145521	C23H42N8O10	Arg-Thr-Leu-Ser-Asp	Amino acid and Its metabolites	Small Peptide	-	709295	3.01275e+06	1.34526e+06	4.35259e+06	3.19885e+06	5.04586e+06	1.22093e+06	2.17121e+06	3.86493e+06	812115	2.10536e+06	1.45906e+06	0.845184	0.249253	0.658583	-0.602562	insig
MW0141371	C18H26O	13-Apo-beta-carotenone	Aldehyde,Ketones,Esters	Ketones	-	1.96638e+06	71052.6	882197	2.35403e+06	1.80838e+06	322657	1.68568e+06	1.01727e+06	2.21438e+06	2.52511e+06	278343	1.38687e+06	0.84336	0.589307	1.22998	0.298638	insig
MW0133752	C16H14O4	4-O-Methylpinosylvic acid	Organic acid And Its derivatives	Organic acid And Its derivatives	-	4.29804e+06	1.0193e+07	9.23244e+06	1.01498e+07	1.38572e+07	1.07085e+06	8.91711e+06	7.94842e+06	1.07343e+07	7.06152e+06	9.01702e+06	8.40159e+06	0.842573	0.789548	1.06718	0.0938084	insig
MW0138887	C25H24O5	Mammeigin	Heterocyclic compounds	Heterocyclic compounds	-	4.41349e+06	7.70269e+06	886257	5.14057e+06	5.09562e+06	5.80612e+06	5.00466e+06	6.05977e+06	1.0256e+07	5.85234e+06	2.72635e+06	6.94995e+06	0.841226	0.362616	1.2687	0.343352	insig
MW0126274	C12H17N2O4P	Psilocybine	Benzene and substituted derivatives	Benzene and substituted derivatives	520-52-5	335914	2.20941e+06	795002	1.46137e+06	2.43909e+06	2.22667e+06	899903	1.47139e+06	1.97406e+06	493831	527162	750020	0.838967	0.223276	0.646041	-0.630302	insig
MW0011869	C35H69O8P	1,2-Dihexadecanoyl-sn-glycero-3-phosphate	GP	PA	19698-29-4	71785.6	90142	64938.3	75849.1	84494.7	55995.1	89505.3	33538.6	110634	77886.4	58163.3	34815.2	0.837441	0.650844	0.912768	-0.13168	insig
MW0159895	C18H39NO2	2-aminooctadecane-1,3-diol	Alcohol and amines	Alcohols	-	6.89519e+06	6.18614e+06	4.33692e+06	6.23887e+06	6.43356e+06	7.2193e+06	5.06891e+06	6.83341e+06	8.84847e+06	6.3819e+06	6.16409e+06	8.35956e+06	0.836343	0.334351	1.11649	0.158975	insig
MW0015500	C18H30O2	9Z,11E,13E-Octadecatrienoic acid	FA	Oxidized lipids	506-23-0	9.81886e+06	1.75246e+06	6.54271e+06	1.44569e+07	5.0238e+06	4.3453e+06	7.58367e+06	3.85121e+06	3.91139e+06	7.03478e+06	1.27243e+06	4.29797e+06	0.835338	0.296157	0.666463	-0.585404	insig
MEDP1889	C12H16N2O4	Ser-Phe	Amino acid and Its metabolites	Small Peptide	16875-28-8	6.82514e+06	1.21549e+06	4.53464e+06	4.22988e+06	4.58925e+06	969493	4.20504e+06	3.28887e+06	4.0734e+06	3.92695e+06	2.60996e+06	6.80249e+06	0.833616	0.705912	1.1137	0.155363	insig
MEDP2352	C12H25N5O3	Ile-Arg	Amino acid and Its metabolites	Small Peptide	55715-01-0	4.47832e+06	2.25119e+06	5.41323e+06	8.23107e+06	1.16067e+07	4.54361e+06	7.93012e+06	8.41768e+06	1.011e+07	3.89892e+06	2.57314e+06	1.68036e+07	0.831309	0.397003	1.36166	0.445367	insig
MEDP2592	C12H25N5O3	Leu-Arg	Amino acid and Its metabolites	Small Peptide	26607-15-8	4.47832e+06	2.25119e+06	5.41323e+06	8.23107e+06	1.16067e+07	4.54361e+06	7.93012e+06	8.41768e+06	1.011e+07	3.89892e+06	2.57314e+06	1.68036e+07	0.831309	0.397003	1.36166	0.445367	insig
MW0155985	C19H25N3O5	Pro-Pro-Tyr	Amino acid and Its metabolites	Small Peptide	-	811874	886648	1.41218e+06	1.51929e+06	1.46695e+06	1.95142e+06	2.89258e+06	2.13919e+06	2.37491e+06	1.56938e+06	431255	2.08033e+06	0.830289	0.179169	1.42733	0.513316	insig
MW0160382	C10H14O	(4R)-4-prop-1-en-2-ylcyclohexene-1-carbaldehyde	Aldehyde,Ketones,Esters	Aldehydes	-	1.42705e+07	177836	3.08032e+07	4.10959e+06	3.15084e+06	24988.8	1.94161e+06	436241	203006	3.14653e+06	128147	467178	0.830164	0.177202	0.120348	-3.05472	insig
MEDP1062	C3H6OS	S-Methyl thioacetate	Aldehyde,Ketones,Esters	Esters	1534-08-3	1.7358e+06	613193	869898	1.19336e+06	1.05401e+06	698385	917277	980360	1.23475e+06	1.36852e+06	1.73793e+06	836627	0.830034	0.500473	1.14775	0.198808	insig
MW0012401	C24H40O3	15(R)-Pinane Thromboxane A2	Hormones and hormone related compounds	Hormones and hormone related compounds	-	1.12752e+06	5.30982e+07	3.0301e+06	4.60345e+06	9.15124e+06	4.06683e+07	2.88854e+06	1.10928e+07	4.95203e+06	3.44587e+06	6.22759e+06	3.0068e+06	0.829111	0.206001	0.283076	-1.82074	insig
MEDN1485	C25H44NO7P	Glycerophospho-N-Arachidonoyl Ethanolamine	GP	LPE	201738-25-2	979780	150850	175775	233444	405858	220217	1.15794e+06	414892	469397	217644	214304	346248	0.828538	0.584979	1.30218	0.38093	insig
MEDN1276	C25H44NO7P	LPE(20:4/0:0)	GP	LPE	-	979780	150850	175775	233444	405858	220217	1.15794e+06	414892	469397	217644	214304	346248	0.828538	0.584979	1.30218	0.38093	insig
MW0158587	C16H21N3O5	Tyr-Pro-Gly	Amino acid and Its metabolites	Small Peptide	-	553259	85861.1	649030	984676	1.01813e+06	284699	1.64557e+06	954870	504549	660556	145246	1.02615e+06	0.825478	0.403671	1.38071	0.465412	insig
MEDN0843	C5H9N3O4	N-Amidino-L-Aspartate	Amino acid and Its metabolites	Amino acid derivatives	6133-30-8	106905	100076	214163	230182	142660	41780	258801	233152	106541	226452	201147	57473.4	0.825078	0.370036	1.29649	0.374614	insig
MW0115457	C14H24O8	Valproic acid glucuronide	Organic acid And Its derivatives	Organic acid And Its derivatives	60113-83-9	184461	9330.67	69250.2	21382.4	39738.4	31508.2	188031	54322.2	61023.8	53382.4	24387	48510.1	0.824716	0.735956	1.20802	0.272641	insig
MEDN1476	C4H8N4O4	Allantoic acid	Amino acid and Its metabolites	Amino acid derivatives	99-16-1	361781	165025	791226	773814	292080	93839.6	825338	617342	180983	723454	867661	162738	0.824577	0.419214	1.36313	0.446923	insig
MEDP2418	C10H13N5O3	2'-Deoxyadenosine	Nucleotide And Its metabolites	Nucleotide And Its metabolites	958-09-8	2.9697e+06	1.17902e+07	8.10117e+06	6.97661e+06	9.54251e+06	8.93837e+06	4.11152e+06	1.39462e+07	2.36738e+06	962790	1.96465e+07	3.92273e+06	0.823183	0.870282	0.930431	-0.104028	insig
MEDP1018	C10H13N5O3	5'-Deoxyadenosine	Nucleotide And Its metabolites	Nucleotide And Its metabolites	4754-39-6	2.9697e+06	1.17902e+07	8.10117e+06	6.97661e+06	9.54251e+06	8.93837e+06	4.11152e+06	1.39462e+07	2.36738e+06	962790	1.96465e+07	3.92273e+06	0.823183	0.870282	0.930431	-0.104028	insig
MEDP1673	C16H31N3O5	Ile-Ile-Thr	Amino acid and Its metabolites	Small Peptide	-	1.56941e+06	539791	1.26005e+06	1.59215e+06	2.37681e+06	1.1191e+06	2.72711e+06	2.48063e+06	1.44969e+06	867667	690596	3.03884e+06	0.821532	0.358776	1.33075	0.412236	insig
MW0151470	C27H47N5O10	Ile-Ile-Glu-Glu-Val	Amino acid and Its metabolites	Small Peptide	-	593884	1.88358e+06	51418.2	48877.3	247638	1.03009e+06	941082	1.28432e+06	689626	105307	1.18378e+06	398672	0.820586	0.727995	1.19383	0.255594	insig
MW0139125	C25H27NO	N-Desmethyltamoxifen	Heterocyclic compounds	Heterocyclic compounds	31750-48-8	559061	588570	1.10051e+06	882871	468714	273332	564263	614770	449987	887215	6.4248e+06	470687	0.820044	0.388637	2.43005	1.28099	insig
MW0121693	C10H16O4	5-Pentyltetrahydro-2-oxo-3-furancarboxylic acid	Organic acid And Its derivatives	Organic acid And Its derivatives	-	112658	185924	367135	382830	365051	162218	474142	377405	204507	267202	286804	174559	0.814394	0.617463	1.1325	0.179517	insig
MEDP1646	C6H17N3	Caldine	Alcohol and amines	Amines	56-18-8	550801	94765.8	598273	1.08453e+06	801558	1.49481e+06	389701	1.34005e+06	1.93117e+06	341673	599821	2.29222e+06	0.814204	0.364452	1.49082	0.576104	insig
MW0123169	C19H25NO4	Bucharaine	Heterocyclic compounds	Heterocyclic compounds	21059-47-2	264612	118470	423290	414152	427366	66792.4	550347	403697	264821	297159	135803	340476	0.81381	0.608163	1.16191	0.216495	insig
MEDN1445	C22H32O3	20-HDoHE	FA	Oxidized lipids	90906-41-5	2.49956e+06	184422	1.3033e+06	4.79608e+06	4.22703e+06	1.1065e+06	4.68674e+06	2.94054e+06	1.45233e+06	3.09647e+06	876896	2.23208e+06	0.813737	0.838854	1.08275	0.114699	insig
MEDP0143	C10H16N2O3S	Biotin	CoEnzyme and vitamins	CoEnzyme and vitamins	58-85-5	486192	3.11689e+06	526256	1.86174e+06	1.86628e+06	4.49437e+06	2.17682e+06	3.20386e+06	2.30937e+06	1.25245e+06	2.69844e+06	1.56166e+06	0.813374	0.844248	1.06889	0.0961089	insig
MEDP1061	C9H11NO2	L-Phenylalanine	Amino acid and Its metabolites	Amino acids	63-91-2	6.16257e+07	3.06277e+07	3.29348e+07	3.7245e+07	3.06996e+07	2.35992e+07	4.56274e+07	3.43997e+07	3.06772e+07	4.13968e+07	5.53461e+07	3.54158e+07	0.81305	0.522842	1.12057	0.16423	insig
MW0137633	C16H14O3	Chalepensin	Heterocyclic compounds	Heterocyclic compounds	13164-03-9	150843	190932	352874	719526	471828	733063	267639	334146	552076	245861	166187	217821	0.812332	0.269909	0.681056	-0.554155	insig
MEDP1850	C12H25N5O3	Arg-Leu	Amino acid and Its metabolites	Small Peptide	1188-24-5	2.8215e+06	243983	3.48417e+06	905358	1.26576e+06	1.80909e+06	2.1188e+06	942825	1.35356e+06	2.46502e+06	1.12602e+06	6.4917e+06	0.811837	0.520284	1.37684	0.461362	insig
MW0006044	C17H19N5	Anastrozole	Benzene and substituted derivatives	Benzene and substituted derivatives	120511-73-1	250986	807363	552944	502487	1.12378e+06	1.62883e+06	610626	863100	674162	318630	288714	493612	0.810587	0.265432	0.667608	-0.582927	insig
MW0158467	C25H39N5O8	Tyr-Glu-Val-Lys	Amino acid and Its metabolites	Small Peptide	-	84717.5	176816	43024.7	123475	94140.1	133409	126971	63694.7	117338	50252.3	103633	62120	0.810504	0.365304	0.799304	-0.323183	insig
MEDN1113	C24H38O4	12-ketolithocholic acid	Bile acids	Bile acids	5130-29-0	1.58178e+07	9.00069e+07	5.10801e+06	3.401e+07	2.78143e+07	3.61072e+07	8.77408e+07	20577365	3.89172e+07	1.87431e+07	8.07006e+07	2.71273e+07	0.810266	0.547839	1.31093	0.39059	insig
MEDN1104	C24H38O4	7-ketolithocholic acid	Bile acids	Bile acids	4651-67-6	1.58178e+07	9.00069e+07	5.10801e+06	3.401e+07	2.78143e+07	3.61072e+07	8.77408e+07	20577365	3.89172e+07	1.87431e+07	8.07006e+07	2.71273e+07	0.810266	0.547839	1.31093	0.39059	insig
MEDN1141	C24H38O4	Apocholic acid	Bile acids	Bile acids	641-81-6	1.58178e+07	9.00069e+07	5.10801e+06	3.401e+07	2.78143e+07	3.61072e+07	8.77408e+07	20577365	3.89172e+07	1.87431e+07	8.07006e+07	2.71273e+07	0.810266	0.547839	1.31093	0.39059	insig
MW0110081	C20H29N5O5	Trp-Ser-Lys	Amino acid and Its metabolites	Small Peptide	-	113140	136938	269383	212423	310951	572766	272434	240802	230041	141606	30186.6	243356	0.809323	0.355759	0.717025	-0.479904	insig
MW0115119	C12H14O7	Phenyl glucuronide	Benzene and substituted derivatives	Benzene and substituted derivatives	17685-05-1	1.95761e+06	1.71352e+07	1.12883e+07	1.31464e+07	1.50896e+07	2.97904e+07	8.55981e+06	1.42012e+07	1.33867e+07	4.38319e+06	3.71962e+06	7.85741e+06	0.808202	0.183124	0.589406	-0.762667	insig
MEDP1996	C3H5NO3	N-Formylglycine	Amino acid and Its metabolites	Amino acids	2491-15-8	4.44732e+07	2.44503e+07	1.74553e+07	1.93944e+07	1.88906e+07	2.16142e+07	1.70897e+07	1.93569e+07	2.22656e+07	1.6799e+07	2.32135e+07	2.72806e+07	0.807716	0.474785	0.861409	-0.215229	insig
MW0109288	C12H20O5	Polyethylene,oxidized	Organic acid And Its derivatives	Organic acid And Its derivatives	-	116822	207666	216160	71260.6	86261.6	87689.4	87476.6	206472	151672	125944	36252.8	56117	0.807427	0.594255	0.844851	-0.243231	insig
MW0110174	C19H33NO4	Tumonoic Acid A	Organic acid And Its derivatives	Organic acid And Its derivatives	-	97217.8	248174	176795	146411	303566	222735	192639	227194	174497	106197	113022	133734	0.806443	0.283846	0.792771	-0.335024	insig
MEDN2013	C17H25N3O4	Val-Phe-Ala	Amino acid and Its metabolites	Small Peptide	-	72716.4	15369.1	66417.8	47391.2	60633	29341.3	68827	64671.5	57273.2	40814.9	22275.3	126634	0.805669	0.411934	1.30365	0.382561	insig
MEDN1161	C7H5NO4	Quinolinic acid	Heterocyclic compounds	Heterocyclic compounds	89-00-9	159529	1.90863e+06	148209	265227	353474	1.8217e+06	635592	977540	1.46565e+06	326290	744586	578304	0.805547	0.976052	1.01529	0.0218881	insig
MW0151145	C22H38N10O6	His-Val-Gln-Arg	Amino acid and Its metabolites	Small Peptide	-	1.85737e+06	94236.4	433423	2.20815e+06	754773	261814	916870	538405	1.69179e+06	1.85213e+06	461405	698847	0.804527	0.838558	1.09798	0.134858	insig
MW0147448	C27H46O2	Cholesterol-5beta,6beta-epoxide	Hormones and hormone related compounds	Hormones and hormone related compounds	4025-59-6	1.09344e+06	180711	1.41268e+06	1.52906e+06	776306	116172	1.25675e+06	311074	187524	1.16968e+06	53666.2	240711	0.804188	0.361143	0.630222	-0.666068	insig
MW0147772	C36H38N4O8	Coproporphyrin I	Organic acid And Its derivatives	Organic acid And Its derivatives	531-14-6	50897.4	2814.13	76296.3	121713	61852.7	9473.56	51220.2	59824.6	38929	76609.3	61490.2	20300.7	0.803387	0.90492	0.954578	-0.0670645	insig
MW0013469	C12H16O5	3-Carboxy-4-methyl-5-propyl-2-furanpropionic acid	Organic acid And Its derivatives	Organic acid And Its derivatives	86879-39-2	20076.7	56896.1	62597.4	55257.6	36196.8	58266.5	82586.5	35681.7	69972.9	62798.7	61204.1	34943.1	0.801638	0.371126	1.20013	0.263191	insig
MEDP2507	C15H23N5O3	Arg-Phe	Amino acid and Its metabolites	Small Peptide	-	1.23973e+06	174763	696032	1.16884e+06	1.06102e+06	279257	1.10947e+06	924032	774896	706399	347375	1.51877e+06	0.801342	0.620805	1.16479	0.220074	insig
MW0155739	C15H26O	Presilphiperfolan-8beta-ol	Terpenoids	Sesquiterpenoids	-	3.31089e+06	378460	2.33207e+06	3.28041e+06	4.00624e+06	1.26688e+06	4.46308e+06	2.726e+06	3.24969e+06	3.71267e+06	758844	2.93712e+06	0.801209	0.489999	1.22453	0.292225	insig
MW0006336	C24H34N2O	Bepridil	Benzene and substituted derivatives	Benzene and substituted derivatives	64706-54-3	2.79295e+07	194060	2.13664e+07	1.00432e+07	1.94339e+07	166026	1.5601e+07	2.05485e+07	1.75143e+07	2.05038e+07	851274	6.05887e+06	0.799273	0.956595	1.02457	0.0350234	insig
MW0109536	C10H8F2N4O	Rufinamide	Alcohol and amines	Amines	106308-44-5	500787	786422	1.79427e+06	1.00612e+06	1.88703e+06	2.60153e+06	1.18459e+06	1.78244e+06	1.21593e+06	665916	152660	1.17675e+06	0.799223	0.340147	0.720403	-0.473124	insig
MEDN0224	C12H22O11	D-Trehalose	Carbohydrates and Its metabolites	Sugars	99-20-7	84991.9	128283	104275	173642	124959	219069	85643.2	142333	246883	112518	193997	275161	0.798637	0.343184	1.26498	0.339114	insig
MEDN0229	C12H22O11	Lactose	Carbohydrates and Its metabolites	Sugars	63-42-3	84991.9	128283	104275	173642	124959	219069	85643.2	142333	246883	112518	193997	275161	0.798637	0.343184	1.26498	0.339114	insig
MEDN0230	C12H22O11	Lactulose	Carbohydrates and Its metabolites	Sugars	4618-18-2	84991.9	128283	104275	173642	124959	219069	85643.2	142333	246883	112518	193997	275161	0.798637	0.343184	1.26498	0.339114	insig
MEDN0233	C12H22O11	Maltose	Carbohydrates and Its metabolites	Sugars	69-79-4	84991.9	128283	104275	173642	124959	219069	85643.2	142333	246883	112518	193997	275161	0.798637	0.343184	1.26498	0.339114	insig
MEDP0296	C5H11N3O2	4-Guanidinobutyric Acid	Organic acid And Its derivatives	Organic acid And Its derivatives	463-00-3	2.00569e+07	1.13009e+07	1.1805e+07	3.03193e+07	6.5513e+07	1.70449e+08	5.41805e+07	1.00439e+08	3.48922e+07	1.21582e+07	6.60134e+07	4.8602e+07	0.798082	0.968549	1.02211	0.0315472	insig
MEDN0413	C5H8O4	Ethylmalonate	Organic acid And Its derivatives	Organic acid And Its derivatives	601-75-2	1.11189e+07	5.75622e+06	1.75865e+07	1.04131e+07	1.28524e+07	2.04905e+06	1.43617e+07	7.49767e+06	1.03343e+07	1.50442e+07	1.72897e+07	5.60927e+06	0.797587	0.566769	1.17332	0.230602	insig
MEDN1069	C18H28O2	FFA(18:4)	FA	FFA	2012-14-8	3.02919e+06	100098	1.35062e+06	3.73775e+06	2.93346e+06	493913	2.65889e+06	1.65097e+06	2.79573e+06	3.46518e+06	512546	1.66763e+06	0.796576	0.810947	1.09497	0.130891	insig
MW0161150	C15H20O3	(1S,2R,4R,7E,11S)-4,8-dimethyl-12-methylidene-3,14-dioxatricyclo[9.3.0.02,4]tetradec-7-en-13-one	Aldehyde,Ketones,Esters	Ketones	-	465548	56820.4	284679	942275	545285	100827	428405	793618	522827	426522	112976	451671	0.795836	0.73284	1.14218	0.191791	insig
MW0168999	C6H12N2O4S2	Cystine	Amino acid and Its metabolites	Small Peptide	13028-62-1	2.8783e+07	2.45778e+07	3.19595e+07	2.64777e+07	26109531	9.66713e+06	2.72837e+07	1.29612e+07	1.64479e+07	2.39569e+07	2.876e+07	1.10188e+07	0.795736	0.331173	0.816051	-0.293268	insig
MW0012743	C18H28O2	19-Noretiocholanolone	Aldehyde,Ketones,Esters	Ketones	33036-33-8	414315	21985.6	538239	432121	238050	14064.6	418776	62755.7	12316.9	318434	5818.26	62125	0.794913	0.290082	0.530648	-0.914173	insig
MEDP1734	C4H6N4O	5-Aminoimidazole-4-carboxamide	Heterocyclic compounds	Heterocyclic compounds	360-97-4	78284.9	165653	48868	95049.7	144764	168037	183991	180406	133807	47104.8	116640	249983	0.792841	0.338149	1.30154	0.380218	insig
MW0012074	C21H32O4	11b,21-Dihydroxy-5b-pregnane-3,20-dione	Aldehyde,Ketones,Esters	Ketones	-	1.46695e+06	1.31568e+06	1.30645e+06	2.65079e+06	1.72241e+06	1.42979e+06	877857	2.23034e+06	1.90237e+06	1.13943e+06	1.3511e+06	1.22108e+06	0.791824	0.524151	0.881735	-0.181582	insig
MW0145354	C25H44N8O11	Arg-Glu-Ser-Leu-Glu	Amino acid and Its metabolites	Small Peptide	-	216454	1.93285e+06	1.13533e+06	1.47772e+06	1.73807e+06	1.86119e+06	981884	996784	1.52668e+06	580899	738794	453245	0.790647	0.13172	0.631252	-0.663712	insig
MEDP0298	C6H13NO2	6-Aminocaproic Acid	Amino acid and Its metabolites	Amino acid derivatives	60-32-2	2.08131e+06	928494	634790	887276	685214	460563	1.21822e+06	924867	716244	1.08938e+06	1.92112e+06	797515	0.790543	0.592028	1.17432	0.231821	insig
MEDP0752	C6H13NO2	DL-Leucine	Amino acid and Its metabolites	Amino acids	328-39-2	2.08131e+06	928494	634790	887276	685214	460563	1.21822e+06	924867	716244	1.08938e+06	1.92112e+06	797515	0.790543	0.592028	1.17432	0.231821	insig
MEDP1884	C11H16N4O3	Pro-His	Amino acid and Its metabolites	Small Peptide	100896-87-5	34305.4	165670	52383.5	81795	189195	214259	151419	165907	247065	84427.4	80609.6	112032	0.790201	0.67707	1.14079	0.19004	insig
MEDP2556	C9H14N2O5	Pro-Asp	Amino acid and Its metabolites	Small Peptide	85227-98-1	5.32884e+06	1.13277e+06	2.89547e+06	4.1095e+06	3.73068e+06	1.3056e+06	4.81902e+06	2.55912e+06	2.21921e+06	3.49435e+06	3.48963e+06	3.47649e+06	0.78901	0.744262	1.08404	0.116418	insig
MW0144314	C20H33N5O9	Ac-Ser-Asp-Lys-Pro	Amino acid and Its metabolites	Amino acid derivatives	-	6.94676e+06	2.20678e+07	1.96085e+07	1.55751e+07	3.46635e+07	9.16972e+06	2.50741e+07	1.80294e+07	1.5408e+07	3.18535e+07	2.69157e+07	8.261e+06	0.78685	0.600931	1.16209	0.216718	insig
MW0123747	C32H42N2O2	Docosahexaenoyl Serotonin	Tryptamines,Cholines,Pigments	Tryptamines	283601-58-1	322296	2.78386e+06	86031.6	737960	539733	1.46577e+06	1.28575e+06	495402	740480	576489	3.31398e+06	871185	0.786288	0.714146	1.22704	0.295184	insig
MEDP0165	C4H5N3O	Cytosine	Nucleotide And Its metabolites	Nucleotide And Its metabolites	71-30-7	1.11737e+07	1.30208e+06	3.81305e+06	2.78157e+06	1.79226e+06	1.03581e+06	2.5986e+06	4.41866e+06	1.38414e+06	4.62307e+06	7.56092e+06	4.3915e+06	0.786022	0.780907	1.14058	0.189763	insig
MEDP0611	C8H11N3O3	N-Acetyl-L-Histidine	Amino acid and Its metabolites	Amino acid derivatives	2497-02-1	850973	1.31187e+07	1.08894e+06	1.45362e+06	8.39468e+06	3.57651e+06	4.19987e+06	8.58695e+06	8.9597e+06	1.61037e+06	1.4409e+06	1.01978e+07	0.78597	0.683888	1.22863	0.297049	insig
MEDN1239	C10H13O10P	5-O-(1-carboxyvinyl)-3-phosphate	Organic acid And Its derivatives	Phosphoric acids	89771-75-5	1.69574e+06	60503.4	1.55806e+07	4.15895e+06	1.63756e+06	159785	5.67099e+06	1.19654e+06	255642	1.66219e+07	2.89564e+06	1.48315e+06	0.783816	0.821851	1.20739	0.271895	insig
MW0009497	C29H27F3N6O	Ponatinib	Benzene and substituted derivatives	Benzene and substituted derivatives	943319-70-8	1.81291e+06	1.65109e+06	364985	1.70782e+06	1.71119e+06	1.73925e+06	660771	1.08671e+06	761850	849951	1.82434e+06	1.39406e+06	0.782838	0.198697	0.73189	-0.450301	insig
MW0009656	C21H34O2	Rel-5-(1,1-Dimethylheptyl)-2-[(1R,3S)-3-hydroxycyclohexyl]phenol	Benzene and substituted derivatives	Benzene and substituted derivatives	114753-51-4	46513.6	106596	50782.2	31999.4	69447.7	110495	66755.3	101792	92532.7	73809.8	49495.3	81725.3	0.780679	0.600609	1.12091	0.164666	insig
MW0011688	C18H34O2	(Z)-6-Octadecenoic acid	FA	FFA	593-39-5	3.48926e+06	3.80046e+06	1.10446e+06	2.16256e+06	386929	717020	990926	2.84293e+06	5.97866e+06	2.14833e+06	981763	6.68779e+06	0.777567	0.290764	1.68347	0.751436	insig
MW0159157	C20H33N5O9	Val-Ser-Gly-Pro-Glu	Amino acid and Its metabolites	Small Peptide	-	6.70375e+06	2.19379e+07	1.9345e+07	1.55679e+07	3.48683e+07	8.95505e+06	2.44601e+07	1.8174e+07	1.55376e+07	3.11554e+07	2.65841e+07	8.01275e+06	0.777405	0.619941	1.15409	0.206757	insig
MW0054426	C27H34O7	Lucidenic acid D1	Organic acid And Its derivatives	Organic acid And Its derivatives	-	502124	4.76776e+06	156795	455484	376784	2.42368e+06	7.50964e+06	258279	3.14776e+06	456934	1.64539e+06	1.7511e+06	0.776978	0.463912	1.701	0.76638	insig
MEDP2104	C9H8N2	3-Aminoquinoline	Benzene and substituted derivatives	Benzene and substituted derivatives	580-17-6	16668.4	330837	55372.8	221678	52289.4	1.61348e+06	88471.9	321991	296557	135552	332154	612049	0.776948	0.760058	0.780141	-0.358193	insig
MW0007814	C29H38FN3O3	Mibefradil	Benzene and substituted derivatives	Benzene and substituted derivatives	116644-53-2	177855	5.52696e+06	2.71565e+06	6.42347e+06	5.12401e+06	3.73677e+06	2.43065e+06	3.36429e+06	1.57244e+06	1.92148e+06	383622	1.10073e+06	0.77592	0.0723308	0.454476	-1.13773	insig
MW0109259	C16H27N2O4P	Phosphonic acid,P-[(3R)-3-amino-4-[(3-hexylphenyl)amino]-4-oxobutyl]-	Organic acid And Its derivatives	Organic acid And Its derivatives	909725-61-7	2.09963e+06	565461	1.29047e+06	5.77258e+06	2.30607e+06	1.34532e+06	1.7865e+06	2.70349e+06	2.04353e+06	853312	41552	2.32794e+06	0.775547	0.501224	0.729197	-0.45562	insig
MEDP0056	C8H16N2O4S2	L-Homocystine	Amino acid and Its metabolites	Amino acids	626-72-2	146819	155147	160352	215606	309129	148737	212235	221798	313145	144596	114198	370393	0.774674	0.423116	1.21181	0.277166	insig
MW0116980	C13H16N4O	1H-Benzimidazole-7-carboxamide,2-[(2R)-2-methyl-2-pyrrolidinyl]-	Alcohol and amines	Amines	912444-00-9	15587.6	90123.1	20404.9	54904.1	100571	61583.8	29282.3	65538.8	87827.3	54652.1	73690.7	63565.3	0.774395	0.757302	1.09145	0.126241	insig
MEDN1461	C22H34O4	(±)7(8)-DiHDPE(A)	FA	Oxidized lipids	-	1.98797e+06	244191	292200	424103	333729	218844	417037	496903	1.00841e+06	818860	258240	899045	0.77373	0.835935	1.11352	0.155133	insig
MEDN1322	C7H6O4	2,3-Dihydroxybenzoic acid	Organic acid And Its derivatives	Organic acid And Its derivatives	303-38-8	936530	145274	1.05094e+06	298407	868762	152762	469229	472416	973649	773507	266244	839451	0.773717	0.786692	1.099	0.136193	insig
MEDN0089	C7H6O4	2,5-Dihydroxybenzoic acid	Benzene and substituted derivatives	Phenolic acids	490-79-9	936530	145274	1.05094e+06	298407	868762	152762	469229	472416	973649	773507	266244	839451	0.773717	0.786692	1.099	0.136193	insig
MEDN1701	C7H6O4	3,5-Dihydroxybenzoic acid	Organic acid And Its derivatives	Organic acid And Its derivatives	99-10-5	936530	145274	1.05094e+06	298407	868762	152762	469229	472416	973649	773507	266244	839451	0.773717	0.786692	1.099	0.136193	insig
MEDP2383	C12H16N2O5	Tyr-Ser	Amino acid and Its metabolites	Small Peptide	13588-99-3	985438	343840	1.13817e+06	1.07665e+06	1.12012e+06	360060	1.12151e+06	706326	1.07578e+06	841524	488107	1.70115e+06	0.773392	0.527006	1.18114	0.240185	insig
MW0155400	C18H26N4O5	Phe-Val-Asn	Amino acid and Its metabolites	Small Peptide	-	9.31266e+06	1.54044e+07	6.83655e+06	4.0128e+07	1.16489e+07	1.09028e+07	1.05771e+07	1.44066e+07	1.16468e+07	1.4679e+07	6.79611e+06	7.91423e+06	0.772327	0.401737	0.700599	-0.513339	insig
MW0107449	C18H35N3O4	Ile-Leu-Leu	Amino acid and Its metabolites	Small Peptide	-	1.20371e+06	511399	1.21669e+06	2.18841e+06	2.40786e+06	779202	3.07308e+06	3.15095e+06	1.00973e+06	472728	981114	3.2872e+06	0.771499	0.349623	1.44149	0.527557	insig
MW0144452	C17H32N8O6	Ala-Ala-Arg-Gly-Ala	Amino acid and Its metabolites	Small Peptide	-	5.30383e+06	405195	8.83419e+06	1.92587e+07	9.15003e+06	489945	1.24104e+07	1.22793e+06	298127	8.68917e+06	114203	1.43446e+06	0.771131	0.39132	0.556475	-0.845611	insig
MEDN0285	C5H8O4	2-Methylsuccinic Acid	Organic acid And Its derivatives	Organic acid And Its derivatives	498-21-5	1.27816e+07	6.8565e+06	2.08828e+07	1.25776e+07	1.53133e+07	2.42675e+06	1.67769e+07	9.05209e+06	1.1675e+07	1.78172e+07	1.99037e+07	6.59729e+06	0.770502	0.604005	1.15505	0.207959	insig
MEDN1533	C5H8O4	Dimethylmalonic acid	Organic acid And Its derivatives	Organic acid And Its derivatives	595-46-0	1.27816e+07	6.8565e+06	2.08828e+07	1.25776e+07	1.53133e+07	2.42675e+06	1.67769e+07	9.05209e+06	1.1675e+07	1.78172e+07	1.99037e+07	6.59729e+06	0.770502	0.604005	1.15505	0.207959	insig
MEDN1895	C5H8O4	Ethyl hydrogen malonate	Aldehyde,Ketones,Esters	Esters	1071-46-1	1.27816e+07	6.8565e+06	2.08828e+07	1.25776e+07	1.53133e+07	2.42675e+06	1.67769e+07	9.05209e+06	1.1675e+07	1.78172e+07	1.99037e+07	6.59729e+06	0.770502	0.604005	1.15505	0.207959	insig
MEDN0314	C5H8O4	Glutaric Acid	Organic acid And Its derivatives	Organic acid And Its derivatives	110-94-1	1.27816e+07	6.8565e+06	2.08828e+07	1.25776e+07	1.53133e+07	2.42675e+06	1.67769e+07	9.05209e+06	1.1675e+07	1.78172e+07	1.99037e+07	6.59729e+06	0.770502	0.604005	1.15505	0.207959	insig
MEDN1475	C6H15O9P	Sorbitol 6-phosphate	Carbohydrates and Its metabolites	Phosphate sugars	20479-58-7	46437.4	46059.7	49685.1	22278.6	40215.6	31818.6	40520.3	54223.1	8896.34	48049.2	34549.2	17582.5	0.769461	0.533003	0.861839	-0.21451	insig
MW0168881	C23H26N2O5	C23H26N2O5	Others	Others	82768-85-2	379713	9	99952.9	311601	130247	88827.6	148197	54848.2	165561	119265	30269.3	279658	0.767527	0.62441	0.789625	-0.34076	insig
MW0143591	C22H32O4	5-cis-15(R)-Iloprost	Hormones and hormone related compounds	Hormones and hormone related compounds	-	3.99829e+06	1.30087e+06	3.45818e+06	4.24636e+06	3.12445e+06	2.69853e+06	3.9278e+06	2.55971e+06	2.37979e+06	3.81894e+06	768732	2.05043e+06	0.766931	0.413098	0.823586	-0.280008	insig
MW0152272	C27H46N8O8	Leu-Asp-Val-Lys-His	Amino acid and Its metabolites	Small Peptide	-	43482.4	272991	132806	197814	230222	200547	147393	143195	158890	113396	117469	65010.8	0.765762	0.167838	0.691511	-0.532177	insig
MW0154030	C14H24O2	Myristic Acid Alkyne	FA	Others	82909-47-5	143295	4897.63	147284	66296.3	144038	11268.4	117850	177722	143200	112168	10122.9	76365.4	0.762365	0.593917	1.23275	0.301877	insig
MEDP0374	C10H12N5O6P	Cyclic Amp	Nucleotide And Its metabolites	Nucleotide And Its metabolites	60-92-4	6.85919e+06	443621	7.60259e+06	4.96304e+06	3.60937e+06	2.06361e+06	1.38301e+06	5.59633e+06	580643	4.36081e+06	3.01416e+06	623232	0.762218	0.268453	0.609136	-0.715164	insig
MW0126756	C10H9ClN4S	Thiacloprid	Heterocyclic compounds	Heterocyclic compounds	111988-49-9	550990	2.58121e+06	3.19444e+06	1.84937e+06	2.44498e+06	3.16971e+06	1.57508e+06	1.98353e+06	2.92304e+06	1.07936e+06	928776	1.45756e+06	0.761665	0.232774	0.721308	-0.471313	insig
ZINC14592806	C20H16O2	2-(4-Methyl-1,3-pentadienyl)anthraquinone	Benzene and substituted derivatives	Benzene and substituted derivatives	-	3.45461e+06	1.13205e+06	657244	918377	1.28631e+06	1.02197e+06	1.58997e+06	1.86909e+06	2.73196e+06	724182	1.22118e+06	2.08919e+06	0.760772	0.577402	1.20719	0.271651	insig
MW0158703	C26H26N2O7	TyrMe-HoPhe-OH	Amino acid and Its metabolites	Small Peptide	-	12989.7	40883.7	26344.2	9578.41	22107	6130.01	13412.9	46234.5	8784.43	14854.2	40034.6	31428.8	0.759009	0.476215	1.31107	0.390743	insig
MW0137417	C22H22O6	Artocarpetin B	Heterocyclic compounds	Heterocyclic compounds	-	497436	6.17049e+07	135975	90969.8	708463	191514	384613	313263	733418	100287	137017	602393	0.758607	0.36556	0.0358601	-4.80148	insig
MEDN0494	C20H32O4	8,15-Dihete	FA	FFA	80234-65-7	7.79557e+06	2.06013e+06	9.88821e+06	4.77698e+06	2172387	2.79255e+06	3.57435e+06	2.78384e+06	2.87683e+06	4.58573e+06	3.8097e+06	2.87455e+06	0.758408	0.318165	0.695419	-0.524046	insig
MW0157766	C24H37N5O8	Thr-Phe-Lys-Glu	Amino acid and Its metabolites	Small Peptide	-	49539.3	232862	105812	129945	235663	394467	352553	454482	207707	175778	48264.4	338008	0.757672	0.382907	1.37317	0.457507	insig
MW0159035	C15H27N3O6	Val-Ile-Asp	Amino acid and Its metabolites	Small Peptide	-	1.46076e+06	297644	1.92492e+06	1.61558e+06	838381	370548	2.05896e+06	1.36035e+06	314000	1.64354e+06	1.03664e+06	1.61589e+06	0.757124	0.511025	1.2338	0.303112	insig
MEDP0012	C5H13ClN2O2	L-Ornithine	Amino acid and Its metabolites	Amino acids	3184-13-2	2.74735e+06	1.05743e+06	398070	656913	732440	1.19709e+06	1.15091e+06	1.97467e+06	1.13312e+06	705467	1.30013e+06	1.38911e+06	0.756636	0.717757	1.12728	0.17284	insig
MEDP2588	C15H22N2O3	Phe-Ile	Amino acid and Its metabolites	Small Peptide	22951-94-6	7.54283e+06	2.42498e+06	1.06449e+07	1.07482e+07	1.24697e+07	3.69402e+06	1.13493e+07	7.62082e+06	1.14264e+07	9.37094e+06	2.86886e+06	1.56777e+07	0.753591	0.475976	1.22703	0.295169	insig
MW0110017	C12H27O4P	Tributyl phosphate	Aldehyde,Ketones,Esters	Esters	126-73-8	697581	6641.53	1.10376e+06	653806	355375	20763.9	447455	62575.2	11994	412961	5995.36	74182.9	0.753415	0.159783	0.357713	-1.48313	insig
MEDN1753	C7H14O2	2,2-Dimethylpentanoic acid	Organic acid And Its derivatives	Organic acid And Its derivatives	1185-39-3	1.40181e+06	4.30956e+06	483835	1.07381e+06	4.09521e+07	6.23706e+07	3.83296e+06	1.32752e+08	6.91945e+06	1.73792e+06	1.98593e+07	3.25176e+06	0.750372	0.696556	1.5223	0.606249	insig
MEDN1699	C7H14O2	2-Methylhexanoic acid	Organic acid And Its derivatives	Organic acid And Its derivatives	4536-23-6	1.40181e+06	4.30956e+06	483835	1.07381e+06	4.09521e+07	6.23706e+07	3.83296e+06	1.32752e+08	6.91945e+06	1.73792e+06	1.98593e+07	3.25176e+06	0.750372	0.696556	1.5223	0.606249	insig
MEDN1740	C7H14O2	4-Methylhexanoic acid	Organic acid And Its derivatives	Organic acid And Its derivatives	1561-11-1	1.40181e+06	4.30956e+06	483835	1.07381e+06	4.09521e+07	6.23706e+07	3.83296e+06	1.32752e+08	6.91945e+06	1.73792e+06	1.98593e+07	3.25176e+06	0.750372	0.696556	1.5223	0.606249	insig
MW0141409	C21H36O5	15(R)-15-methyl PGF2	Hormones and hormone related compounds	Hormones and hormone related compounds	35864-81-4	968814	583866	1.88479e+06	2.25488e+06	1.40798e+06	1.33198e+06	1.45637e+06	3.10391e+06	989588	815321	403346	498053	0.749328	0.694314	0.861754	-0.214652	insig
MEDN0244	C5H4N2O4	Orotic Acid	CoEnzyme and vitamins	CoEnzyme and vitamins	65-86-1	2.83373e+06	2.59436e+06	1.70479e+06	1.2794e+06	1.44616e+06	1.28681e+06	1.6527e+06	4.95694e+06	616504	2.97965e+06	4.04215e+06	2.24615e+06	0.747024	0.248235	1.47992	0.565521	insig
MEDN0747	C14H22O	2,4-Di-tert-butylphenol	Benzene and substituted derivatives	Phenolics	96-76-4	47064.2	62606.7	50058.9	56697.9	58589.5	72129.8	60854.8	53282	66416.9	60033.4	64936	57936.5	0.746316	0.532651	1.04699	0.0662485	insig
MEDN0731	C14H22O	4-tert-Octylphenol	Benzene and substituted derivatives	Phenolics	140-66-9	47064.2	62606.7	50058.9	56697.9	58589.5	72129.8	60854.8	53282	66416.9	60033.4	64936	57936.5	0.746316	0.532651	1.04699	0.0662485	insig
MEDP2010	C8H11NO2	p-Hydroxyphenylethanolamine	Alcohol and amines	Amines	770-05-8	127901	374174	47999.7	75474.1	178380	316884	197233	187981	219396	121183	235532	208455	0.746057	0.889603	1.04369	0.0616919	insig
MEDP2455	C16H21N3O3	Trp-Val	Amino acid and Its metabolites	Small Peptide	24613-12-5	972854	251356	646219	1.02659e+06	734176	258327	793865	580522	1.00443e+06	737497	312922	1.25035e+06	0.74601	0.506753	1.20312	0.266786	insig
MEDN0636	C22H34O3	Ginkgoic acid	Organic acid And Its derivatives	Organic acid And Its derivatives	22910-60-7	163600	186750	184808	282518	366368	224480	238765	286749	482846	126332	133227	1.07928e+06	0.744895	0.343353	1.66642	0.736753	insig
MEDN1542	C24H42O21	Glycogen	Carbohydrates and Its metabolites	Sugars	9005-79-2	26658.4	30966.8	26546.6	22842.8	7250.61	28787.2	13830.8	30541.4	36839.7	20326.1	38729.9	55062.4	0.74436	0.242789	1.36545	0.449373	insig
MW0108801	C10H17NO3	N-Hexanoyl-L-homoserine lactone	Aldehyde,Ketones,Esters	Esters	147852-83-3	1.2412e+06	1386010	1.37496e+06	779240	3.6467e+06	3.24919e+06	3.73014e+06	7.51951e+06	1.82538e+06	1.73671e+06	549518	2.27599e+06	0.743558	0.403146	1.51039	0.594919	insig
MEDP2341	C6H12N2O5	Ser-Ser	Amino acid and Its metabolites	Small Peptide	6620-95-7	280522	86101.4	172681	261812	203683	148883	196542	221881	429733	99384.8	125321	765964	0.743072	0.33081	1.59388	0.672539	insig
MW0009787	C12H14N4O4S	Sulfadimethoxine	Benzene and substituted derivatives	Benzene and substituted derivatives	122-11-2	132845	463991	520116	584858	999295	992747	411948	672975	614820	277426	167447	320708	0.74127	0.231182	0.667413	-0.583349	insig
MW0012036	C20H30O3	11(12)-Epoxy-5Z,8Z,14Z,17Z- eicosatetraenoic acid	FA	Oxidized lipids	504435-15-8	67784.3	6389.78	81019.8	38116.1	57502.5	17684.8	71946.1	82577.2	57986.5	54753.4	9072.8	67540.3	0.737532	0.447012	1.28074	0.356982	insig
MW0150084	C28H44N6O9	Glu-Lys-Tyr-Leu-Gly	Amino acid and Its metabolites	Small Peptide	-	108759	6.3958e+06	16413.7	785889	1.3711e+06	8.11241e+06	985901	2.09729e+06	7.60601e+06	285669	4.59198e+06	763607	0.736329	0.967815	0.972608	-0.0400699	insig
MW0145468	C18H28N6O5	Arg-Phe-Ser	Amino acid and Its metabolites	Small Peptide	-	1.91768e+07	234428	6.27455e+07	1.28171e+06	1.93488e+06	25768.9	2.54048e+06	327045	362574	9.29691e+06	37639.7	282853	0.735853	0.289726	0.150441	-2.73273	insig
MW0143175	C16H18O2	4,4'-(2-Methylpropylidene)bisphenol	Benzene and substituted derivatives	Benzene and substituted derivatives	1844-00-4	580211	1.035e+06	1.21261e+06	1.18111e+06	1.90432e+06	107315	997302	872609	1.30014e+06	906868	1.01396e+06	944151	0.735	0.992853	1.0024	0.00346087	insig
MW0154346	C37H40N4O8S	N-dodecanoyl-L-Homoserine lactone-3-hydrazone-fluorescein	Amino acid and Its metabolites	Amino acid derivatives	-	4.37521e+06	4.16685e+06	2.99317e+06	8.32804e+06	1.06217e+07	233890	6.7187e+06	1.5099e+06	6.34367e+06	4.21086e+06	7.50586e+06	7.1019e+06	0.733058	0.810197	1.08698	0.120331	insig
MEDP1913	C11H18N2O4	N(Alpha)-Acetyl-Epsilon-(2-Propenal)Lysine	Amino acid and Its metabolites	Small Peptide	99124-74-0	621086	133512	740937	446721	541887	160162	573002	378783	443798	565422	282759	552982	0.730981	0.82692	1.05765	0.080861	insig
MEDN0531	C6H10O8	D-Glucarate	Carbohydrates and Its metabolites	Sugar acids	87-73-0	45790.8	131589	59872.8	70937	130526	117156	66033	173603	97298.6	70157.3	104749	118096	0.730941	0.592587	1.13324	0.180457	insig
MEDN2058	C6H10O8	L-Glucaric acid	Carbohydrates and Its metabolites	Sugar acids	576-42-1	45790.8	131589	59872.8	70937	130526	117156	66033	173603	97298.6	70157.3	104749	118096	0.730941	0.592587	1.13324	0.180457	insig
MEDN1314	C6H10O8	Mucic Acid	Carbohydrates and Its metabolites	Sugar acids	526-99-8	45790.8	131589	59872.8	70937	130526	117156	66033	173603	97298.6	70157.3	104749	118096	0.730941	0.592587	1.13324	0.180457	insig
MEDN1449	C20H30O5	Prostaglandin D3	FA	Oxidized lipids	71902-47-1	1.12253e+06	64912	767609	951185	802586	69625.4	863001	1.99454e+06	804213	836155	81790.8	603598	0.730827	0.476972	1.37181	0.456078	insig
MEDN1450	C20H30O5	Prostaglandin E3	FA	Oxidized lipids	802-31-3	1.12253e+06	64912	767609	951185	802586	69625.4	863001	1.99454e+06	804213	836155	81790.8	603598	0.730827	0.476972	1.37181	0.456078	insig
MW0168275	C27H44O3	(24S)-24,25-dihydroxyvitamin D3 / (24S)-24,25-dihydroxycholecalciferol	CoEnzyme and vitamins	CoEnzyme and vitamins	-	310786	70022.7	267300	347979	233317	140099	236617	183283	182360	274848	35174.4	137581	0.730603	0.355715	0.7666	-0.383455	insig
MW0052650	C18H22O2	Estra-1,3,5(10),7-tetraene-3,17beta-diol	Alcohol and amines	Alcohols	3563-27-7	249371	577500	323533	644104	740495	857088	832010	924431	809867	494505	208413	1.08872e+06	0.729403	0.346856	1.28474	0.361475	insig
MW0158685	C13H16N2O6	Tyr-Asp-OH	Amino acid and Its metabolites	Small Peptide	-	252517	1.03809e+06	1.0757e+06	654195	7.29519e+06	1.83336e+06	901136	1059592	1.02414e+06	547423	208757	988164	0.72924	0.304255	0.389266	-1.36117	insig
MEDP1923	C14H16N2O4	Cyclo(Phe-Glu)	Amino acid and Its metabolites	Small Peptide	-	316307	60096.4	379076	235122	202657	110894	243312	255358	143829	267072	201466	259415	0.728918	0.840797	1.05084	0.0715393	insig
MEDN0485	C6H16NaO13P2	D-Fructose-1,6-Biphosphate-Trisodium Salt	Carbohydrates and Its metabolites	Phosphate sugars	81028-91-3	200913	136843	1.25024e+06	647328	310223	194899	361267	256514	151682	382049	241632	154423	0.727964	0.315187	0.564713	-0.824411	insig
MW0009798	C11H12N4O3S	Sulfamethoxypyridazine	Benzene and substituted derivatives	Benzene and substituted derivatives	80-35-3	238201	845778	838459	1.17586e+06	1.73336e+06	2.18189e+06	677162	1.17141e+06	1.38775e+06	482204	286992	649990	0.727307	0.269612	0.663787	-0.591207	insig
MEDP1700	C26H54NO7P	LPC(0:0/18:0)	GP	LPC	-	1.04223e+08	1.69417e+07	6.05947e+06	1.5378e+07	1.07007e+07	7.90238e+06	1.09744e+07	6.3796e+07	8.22654e+07	6.47173e+06	4.15016e+07	2.12701e+07	0.725768	0.598699	1.40367	0.489209	insig
MEDP1337	C26H54NO7P	LPC(18:0/0:0)	GP	LPC	-	1.04223e+08	1.69417e+07	6.05947e+06	1.5378e+07	1.07007e+07	7.90238e+06	1.09744e+07	6.3796e+07	8.22654e+07	6.47173e+06	4.15016e+07	2.12701e+07	0.725768	0.598699	1.40367	0.489209	insig
MEDP0537	C26H54NO7P	LPC(O-16:0/2:0)	GP	LPC	74389-68-7	1.04223e+08	1.69417e+07	6.05947e+06	1.5378e+07	1.07007e+07	7.90238e+06	1.09744e+07	6.3796e+07	8.22654e+07	6.47173e+06	4.15016e+07	2.12701e+07	0.725768	0.598699	1.40367	0.489209	insig
MW0009360	C13H18N4O3	Pentoxifylline	Heterocyclic compounds	Heterocyclic compounds	6493-05-6	737971	1.65322e+06	2.85981e+06	5.79001e+06	1.77256e+06	1.39385e+06	2.93702e+06	748501	1.25758e+06	2.79059e+06	1.77112e+06	552347	0.725143	0.438618	0.707882	-0.498419	insig
MEDL02147	C11H14O4	Sinapyl alcohol	Benzene and substituted derivatives	Phenolics	537-33-7	280274	88933.7	176499	156748	143432	34990.4	159320	81605.7	130795	140974	444195	167073	0.721851	0.535863	1.27596	0.351581	insig
MW0153661	C14H27N3O5S1	Met-Ser-Ile	Amino acid and Its metabolites	Small Peptide	-	112508	169960	303605	507998	540142	335753	539311	576323	310180	200492	169515	491450	0.720565	0.612641	1.16107	0.215456	insig
MW0146148	C16H29N3O6	Asp-Ile-Ile	Amino acid and Its metabolites	Small Peptide	-	410335	193611	608969	932914	786592	297121	1.49332e+06	1.16742e+06	256827	300920	368389	803367	0.720521	0.444633	1.3594	0.442971	insig
MEDP2323	C4H11O4P	Diethyl-phosphate	Aldehyde,Ketones,Esters	Esters	598-02-7	40694.3	60249.5	36633	57305.4	59200.2	55392.5	47043.5	56611.8	48057.6	56195.5	53414.4	63967.4	0.71982	0.604027	1.0511	0.0719045	insig
MW0168300	C21H36FO2P	Methyl Arachidonyl Fluorophosphonate	Aldehyde,Ketones,Esters	Esters	-	1.34989e+07	135402	1.80657e+07	1.40583e+07	6.05914e+06	137032	8.94525e+06	548345	231865	8.69729e+06	41607.9	1.67006e+06	0.718901	0.177471	0.387539	-1.36759	insig
MEDN0499	C10H18N4O6	Argininosuccinic acid	Organic acid And Its derivatives	Organic acid And Its derivatives	2387-71-5	464242	114177	2.21925e+06	3.10048e+06	776571	226223	648861	598036	269766	708043	191234	260483	0.718708	0.22086	0.387835	-1.36649	insig
MEDP1501	C4H5N3O	Isocytosine	Nucleotide And Its metabolites	Nucleotide And Its metabolites	108-53-2	1.94368e+07	1.02274e+07	2.6667e+07	1.15312e+07	2.34925e+07	8.50507e+06	2.43677e+07	2.34443e+07	6.68733e+06	2.63285e+07	1.52896e+07	2.06198e+07	0.717121	0.528883	1.16901	0.225288	insig
MEDP1685	C18H39NO3	Phytosphingosine	SL	SM	554-62-1	4.56444e+06	2.426e+06	598492	1.18463e+06	1.12716e+06	1.84069e+06	2.32014e+06	1.74514e+06	1.02971e+07	1.15249e+06	840226	5.75988e+06	0.716365	0.32295	1.8835	0.913417	insig
MW0137685	C17H18O4	cis-3,4',5-Trimethoxy-3'-hydroxystilbene	Benzene and substituted derivatives	Benzene and substituted derivatives	586410-08-4	348997	386526	469513	385375	514310	357563	582549	600585	303470	511227	280851	486896	0.715605	0.443735	1.12318	0.167583	insig
MW0137085	C19H16O5	7-Hydroxywarfarin	Heterocyclic compounds	Heterocyclic compounds	17834-03-6	3.76669e+07	4.35194e+07	3.35759e+07	3.99814e+07	3.75918e+07	4.17799e+07	3.85182e+07	4.02613e+07	3.90604e+07	4.1399e+07	4.10512e+07	4.06173e+07	0.713857	0.48274	1.02901	0.041259	insig
MEDP1307	C10H13NO2	(2S,3S)-3-methylphenylalanine	Amino acid and Its metabolites	Amino acid derivatives	25488-25-9	614158	372435	351260	416980	521142	383584	502904	524716	553368	359654	356726	625439	0.7131	0.488122	1.09898	0.136168	insig
MW0139986	C18H24O5	Zearalanone	Aldehyde,Ketones,Esters	Ketones	5975-78-0	3.22503e+06	120010	5.45137e+06	1.90317e+06	852740	45582.2	947701	228623	148016	1.44305e+06	198269	312571	0.711683	0.171168	0.282657	-1.82287	insig
MW0010977	C27H44O3	(25R)-3beta,4beta-dihydroxycholest-5-en-26-al	Aldehyde,Ketones,Esters	Aldehydes	-	2.94625e+07	1.23452e+07	1.1729e+07	2.7259e+07	1.81602e+07	1.64743e+07	2.18366e+07	1.69081e+07	2.01953e+07	2.367e+07	6.42042e+06	10351855	0.711239	0.533099	0.860973	-0.215961	insig
MW0000275	C12H10N2	Harman	Alkaloids	Alkaloids	21655-84-5	134541	88837.8	112158	92759.6	80997.6	193426	71109.5	60938.4	165126	124628	66948.7	146549	0.710644	0.66569	0.904059	-0.145512	insig
MW0156803	C23H34N4O8	Ser-Ile-Phe-Glu	Amino acid and Its metabolites	Small Peptide	-	289862	4.97354e+06	285079	696811	524877	2.26678e+06	426547	669813	824601	347159	956876	642155	0.710624	0.308466	0.427927	-1.22456	insig
MEDP2265	C3H8NO5P	2-Amino-3-phosphonopropionic acid	Organic acid And Its derivatives	Phosphoric acids	5652-28-8	2.4556e+06	294465	2.67345e+06	763872	889111	430394	703899	469060	1.29942e+06	883252	450571	627273	0.710404	0.293859	0.590587	-0.759779	insig
MEDP2591	C13H18N2O5	Thr-Tyr	Amino acid and Its metabolites	Small Peptide	145295-02-9	1.73972e+06	334616	1609475	1.67814e+06	1.34186e+06	305356	1.30153e+06	845847	1.59395e+06	1.27477e+06	633799	2.25835e+06	0.709162	0.686853	1.12827	0.174115	insig
MW0013112	C18H30O5	2,3-dinor Prostaglandin E1	Hormones and hormone related compounds	Hormones and hormone related compounds	7046-40-4	729436	121156	509650	782837	740978	140319	824621	776362	427483	983870	135712	580763	0.70909	0.521166	1.23292	0.302079	insig
MW0168538	C11H14O4	3-(2,5-dimethoxyphenyl)propanoic acid	Organic acid And Its derivatives	Organic acid And Its derivatives	-	148295	830296	150162	423803	301908	24068.2	256024	58658.2	119823	551784	1.28801e+06	832106	0.708665	0.393191	1.65363	0.72564	insig
MEDP0545	C4H7NO	2-Pyrrolidinone	Heterocyclic compounds	Heterocyclic compounds	616-45-5	2.72501e+06	3.15316e+06	8.43693e+06	3.00249e+06	3.73627e+06	2.34884e+06	4.0711e+06	4.23225e+06	2.55272e+06	7.93255e+06	7.41595e+06	2.23026e+06	0.708103	0.549198	1.21502	0.280984	insig
MEDP2312	C8H17N3O3	Gly-Lys	Amino acid and Its metabolites	Small Peptide	997-62-6	1.39569e+07	1.68023e+07	1.81557e+07	1.65372e+07	2.06336e+07	2.53946e+07	1.84195e+07	2.36336e+07	3.22354e+07	5.80943e+06	4.78949e+06	2.26178e+07	0.707441	0.891931	0.964343	-0.0523812	insig
MEDP0185	C9H13NO3	Epinephrine	Hormones and hormone related compounds	Hormones and hormone related compounds	51-43-4	82151.5	187595	131807	107963	188011	139765	119215	127289	155213	70750.6	128698	117266	0.707291	0.363963	0.858041	-0.220881	insig
MW0169814	C13H18O7	Salicin	Benzene and substituted derivatives	Benzene and substituted derivatives	138-52-3	1.26453e+06	57577.1	2.17381e+06	604278	1.51607e+06	217047	982308	917813	849347	1.51648e+06	231409	1.12749e+06	0.706824	0.928865	0.964263	-0.0525008	insig
MW0014470	C16H26O3	4-Hydroxy-3-methoxy-2,10-bisaboladien-9-one	Aldehyde,Ketones,Esters	Ketones	-	4.94014e+06	58110.1	4.53195e+06	845561	511371	95243.4	612845	187556	1.48316e+06	1.17172e+06	17437.3	252926	0.706606	0.25647	0.339238	-1.55963	insig
MW0012783	C24H40O6	1b-Hydroxycholic acid	Organic acid And Its derivatives	Organic acid And Its derivatives	-	1.06662e+07	2.75419e+07	7.53726e+06	5.33504e+07	1.78317e+07	1.66865e+07	1.61446e+07	1.88669e+07	1.46233e+07	1.82762e+07	1.06225e+07	1.13072e+07	0.705607	0.339413	0.672389	-0.572632	insig
MW0012480	C21H34O5	15-methyl-15R-PGE2	Hormones and hormone related compounds	Hormones and hormone related compounds	55028-70-1	157306	279472	1.13014e+06	1.52617e+06	852997	246008	791141	1.27455e+06	426217	267109	866765	744060	0.705178	0.915332	1.0424	0.0599105	insig
MW0143017	C21H38O6	3-methoxy Prostaglandin F1	Hormones and hormone related compounds	Hormones and hormone related compounds	54432-43-8	7.71762e+06	5.67073e+06	3.61063e+06	3.63272e+07	1.12716e+07	5.70522e+06	6.57496e+06	9.37138e+06	1.26331e+07	4.9618e+06	2.08374e+06	7.56001e+06	0.704681	0.422937	0.614269	-0.703057	insig
MEDP2386	C11H21N3O4	Ile-Gln	Amino acid and Its metabolites	Small Peptide	59652-60-7	3.01932e+06	1.05283e+06	3.90714e+06	2.32023e+06	2.07374e+06	1.13989e+06	2.67379e+06	2.92831e+06	4.48239e+06	2.0654e+06	942871	4.23599e+06	0.704376	0.388925	1.28236	0.358804	insig
MEDP1812	C13H8O4	Urolithin A	Benzene and substituted derivatives	Benzene and substituted derivatives	1143-70-0	134110	73644.4	329389	206267	218259	115367	210858	186492	227807	167884	88175.7	385423	0.70345	0.577445	1.17604	0.233941	insig
MEDP1991	C15H21N5O4	N6-Isopentenyladenosine	Nucleotide And Its metabolites	Nucleotide And Its metabolites	7724-76-7	348093	125719	216032	320684	247506	80101.9	201394	252321	176561	195022	659741	182482	0.703447	0.552073	1.24615	0.31748	insig
MEDP1916	C11H13NO3	N-Acetyl-L-phenylalanine	Amino acid and Its metabolites	Amino acid derivatives	2018-61-3	2.07071e+06	278920	601076	388142	320709	143557	291206	258611	451722	461243	486345	188252	0.701711	0.392404	0.562008	-0.831338	insig
MEDP0177	C5H6N2O2	Thymine	Nucleotide And Its metabolites	Nucleotide And Its metabolites	65-71-4	1.5806e+06	2.84319e+06	449305	1.74764e+06	1.97941e+06	4.06759e+06	2.03438e+06	3.9128e+06	2.14908e+06	603892	4.22647e+06	4.08691e+06	0.701597	0.376355	1.34306	0.425526	insig
MW0012046	C20H34O5	11,12,15-THETA	FA	Oxidized lipids	-	1.5712e+07	5.91744e+06	1.52234e+07	2.46325e+07	7.4091e+06	4.33971e+06	9.97271e+06	8.28358e+06	6.96195e+06	1.4397e+07	7.16353e+06	5.53775e+06	0.698656	0.34323	0.714373	-0.48525	insig
MW0137394	C26H28O14	Apiin	Flavonoids	Flavonoid	26544-34-3	1.52859e+06	319327	518458	1.31085e+06	666968	186000	432100	822366	281338	447917	2.48768e+06	3.011e+06	0.698329	0.387341	1.65168	0.72393	insig
MEDN0412	C9H11N5O3	Biopterin	Heterocyclic compounds	Pteridines and derivatives	22150-76-1	18146.5	154017	105514	131865	160114	163547	63303.4	118024	64753.1	55880.3	66691.8	86508.1	0.697262	0.102525	0.620783	-0.68784	insig
MW0152374	C17H31N3O6	Leu-Ile-Glu	Amino acid and Its metabolites	Small Peptide	-	1.41128e+06	570103	2.05628e+06	2.19558e+06	1.83279e+06	625985	2.09212e+06	2.2017e+06	604398	1.40209e+06	1.36417e+06	2.23417e+06	0.697253	0.618893	1.13882	0.187539	insig
MEDP1002	C7H15NO2	Acetylcholine	Alcohol and amines	Polyamines	60-31-1	77033.6	38366.1	36691.7	102161	188025	749331	182079	322782	131078	39674.9	199542	177021	0.695302	0.851034	0.882989	-0.179533	insig
MW0012583	C19H26O3	16alpha-Hydroxyandrostenedione	Aldehyde,Ketones,Esters	Ketones	63-02-5	2.65372e+06	42060.6	1.21207e+06	1.27248e+06	2.76496e+06	144699	1.44233e+06	1.68426e+06	8.4968e+06	2.69803e+06	38285.2	2.02627e+06	0.69496	0.324952	2.02546	1.01825	insig
MW0122903	C30H42N2O2	Arachidonoyl Serotonin	Tryptamines,Cholines,Pigments	Tryptamines	187947-37-1	1.28016e+06	286321	939662	1.03134e+06	859570	665537	1.00748e+06	479070	516376	1.58628e+06	1.56851e+06	992426	0.693981	0.471712	1.21482	0.280742	insig
MW0123137	C48H56N2O4	Bismurrayafoline E	Heterocyclic compounds	Heterocyclic compounds	-	6.76022e+06	10415.8	3.27427e+06	4.82101e+06	8.19644e+06	194108	7.27457e+06	4.21101e+06	6.8917e+06	8.02872e+06	39344.8	4.4698e+06	0.692407	0.500761	1.32931	0.410682	insig
MW0154688	C4H8N2O4	O-Carbamoyl-L-serine	Amino acid and Its metabolites	Amino acid derivatives	2105-23-9	4.12119e+07	4.6161e+07	3.5361e+07	4.39033e+07	4.15283e+07	4.73246e+07	4.1124e+07	4.27528e+07	4.11492e+07	4.62033e+07	4.77901e+07	4.50663e+07	0.691051	0.510349	1.03364	0.0477387	insig
MW0103493	C18H26ClN3	Chloroquine	Heterocyclic compounds	Heterocyclic compounds	54-05-7	247614	801026	458517	327856	1.0161e+06	1.7536e+06	575999	785645	548101	308384	250870	496530	0.690548	0.304151	0.644021	-0.63482	insig
MW0055423	C22H37NO2	O-Arachidonoyl Ethanolamine	FA	Others	443129-35-9	733787	2.59479e+06	1.21603e+06	1.98598e+06	2.29885e+06	3.1994e+06	2.10579e+06	2.62652e+06	2.6666e+06	508541	759338	1.22553e+06	0.690506	0.520384	0.822384	-0.282115	insig
MEDP1999	C5H5NO2	2,4-Dihydroxypyridine	Heterocyclic compounds	Pteridines and derivatives	626-03-9	3.11967e+06	275857	1.17943e+06	662230	831021	389885	811369	1.37583e+06	399708	1.29571e+06	1.78845e+06	1.05872e+06	0.689311	0.926297	1.04207	0.0594493	insig
MEDP2389	C5H5NO2	5-Hydroxypyridine-2(1H)-one	Heterocyclic compounds	Pyridine and pyridine derivatives	59273-17-5	3.11967e+06	275857	1.17943e+06	662230	831021	389885	811369	1.37583e+06	399708	1.29571e+06	1.78845e+06	1.05872e+06	0.689311	0.926297	1.04207	0.0594493	insig
MW0149860	C16H30N4O5	Gln-Val-Ile	Amino acid and Its metabolites	Small Peptide	-	1.07457e+06	320550	939991	1.67421e+06	1.33965e+06	468522	1.81789e+06	1.1527e+06	1.04304e+06	405783	663477	2.1664e+06	0.688968	0.506391	1.24612	0.317443	insig
FDATN01012	C24H39NaO5	Sodium cholate	Others	FDA	361-09-1	740899	2.59114e+07	1.53291e+06	969321	1.56225e+06	1.68134e+07	1.57755e+06	1.51799e+06	1.40032e+07	1.70749e+06	656055	1.47059e+06	0.688536	0.394052	0.440411	-1.18308	insig
MEDN1974	C8H16N2O3	Ile-Gly	Amino acid and Its metabolites	Small Peptide	868-28-0	60967.2	19246.2	47300.8	94296.8	52257.4	40871.8	37560.3	72741.3	29544.5	23657.1	16840.5	76444.8	0.686733	0.520666	0.815356	-0.294498	insig
MW0007517	C29H33ClN2O2	Loperamide	Benzene and substituted derivatives	Benzene and substituted derivatives	53179-11-6	27289.9	1.68269e+06	9	112528	165283	231593	136883	177454	163618	26701.8	172170	159889	0.684811	0.425181	0.377003	-1.40735	insig
MW0006009	C15H23NO2	Alprenolol	Benzene and substituted derivatives	Phenolics	13655-52-2	94976.5	217849	115884	111794	240163	205303	168459	159382	167981	78586.6	111491	122508	0.684185	0.352043	0.819913	-0.286457	insig
MW0006838	C10H14O3	Dihydroconiferyl alcohol	Benzene and substituted derivatives	Phenolics	2305-13-7	15015.6	815926	21136	23438	46075.3	22857.8	34870.9	55370	47298.8	29534.4	39604.3	3644.88	0.683725	0.396183	0.222694	-2.16686	insig
MEDP1304	C9H15NO2	Piperidone	Heterocyclic compounds	Heterocyclic compounds	77-03-2	464790	830296	363981	388031	274658	378302	212616	361770	782324	542490	376041	226515	0.683646	0.786712	0.926556	-0.11005	insig
MW0112865	C11H14O	Isovalerophenone	Aldehyde,Ketones,Esters	Ketones	582-62-7	1.48479e+07	1.43344e+07	1.30038e+07	9.69131e+06	1.18678e+07	1.12762e+07	1.16736e+07	1.70181e+07	1.00651e+07	9.06148e+06	1.20339e+07	1.05893e+07	0.682724	0.597042	0.938952	-0.0908761	insig
MEDP1960	C16H23N5O5	7-(alpha-D-glucosyl)-N(6)-isopentenyladenine	Nucleotide And Its metabolites	Nucleotide And Its metabolites	-	1.91874e+06	275366	516337	781915	417075	782641	598459	1.02116e+06	1.11301e+06	259445	1.09103e+06	2.46915e+06	0.68205	0.447473	1.39645	0.481764	insig
MEDN1771	C13H10O3	4,4'-Dihydroxybenzophenone	Benzene and substituted derivatives	Benzene and substituted derivatives	611-99-4	32184.8	24889	14390.5	18537.8	14222.8	12448	24492.7	14220.3	14285.2	19746.3	42132.7	26244.4	0.681515	0.459371	1.20955	0.274468	insig
MEDP0277	C11H11NO2	Methyl Indole-3-Acetate	Heterocyclic compounds	Indole and Its derivatives	1912-33-0	24112.2	114386	48330.4	57266.7	77101.3	107074	78072.4	119352	85126.3	55849.5	64450	61012.1	0.681129	0.737894	1.0831	0.115173	insig
MEDN1969	C9H18N2O3	Ile-Ala	Amino acid and Its metabolites	Small Peptide	24787-73-3	437138	132349	314294	278696	323719	109512	288559	267405	420824	282054	120164	594567	0.678639	0.467645	1.2368	0.306613	insig
MW0164600	C21H32O2	1-[(3R,9S,10R,13S,14S,17S)-3-hydroxy-10,13-dimethyl-2,3,4,7,8,9,11,12,14,15,16,17-dodecahydro-1H-cyclopenta[a]phenanthren-17-yl]ethanone	Aldehyde,Ketones,Esters	Ketones	-	5.55811e+06	1.78301e+07	9.32432e+06	2.26911e+07	9.70932e+06	2.37756e+06	2.17583e+07	1.52024e+07	4.63734e+06	7.72962e+06	1.4039e+07	1.3897e+07	0.676779	0.690594	1.14481	0.195105	insig
MW0006964	C12H16O3	Elemicin	Benzene and substituted derivatives	Phenolics	-	1.47105e+06	34591.1	1.49371e+06	583312	1.55964e+06	42892.4	1.02603e+06	811023	883973	1.43259e+06	78871.2	779297	0.676164	0.936046	0.966554	-0.0490777	insig
MEDN0832	C6H14NO8P	D-Glucosamine 6-Phosphate	Carbohydrates and Its metabolites	Phosphate sugars	3616-42-0	409681	150019	147514	981957	9	69620.5	9	315679	904503	9	71164.8	1.19033e+06	0.675418	0.650109	1.41101	0.496733	insig
MEDN2102	C6H12O6	L-rhamnonic acid	Carbohydrates and Its metabolites	Sugar acids	6422-34-0	175527	269065	54754.5	124090	380930	114936	354554	159758	248907	198868	231777	77096.9	0.675235	0.6913	1.13549	0.183319	insig
MEDP1507	C13H17N3O4	Phe-Asn	Amino acid and Its metabolites	Small Peptide	-	2.42286e+06	645027	1.96295e+06	2.13942e+06	2.48097e+06	625375	2.84879e+06	1.70708e+06	2.73885e+06	1.73889e+06	609200	2.8601e+06	0.6736	0.481158	1.21664	0.282903	insig
MW0109069	C17H26N6O4	Pentosidine	Amino acid and Its metabolites	Small Peptide	124505-87-9	278055	267459	370805	739112	395212	343531	338178	368283	459312	235247	304052	320690	0.673065	0.453809	0.846122	-0.241063	insig
MW0144081	C22H34O5	8-iso-16-cyclohexyl-tetranor Prostaglandin E2	Hormones and hormone related compounds	Hormones and hormone related compounds	53319-30-5	3.55669e+06	458355	2.68656e+06	8.53303e+06	9.70323e+06	2.77271e+06	7.11662e+06	8.23899e+06	4.33519e+06	3.62472e+06	1.07295e+06	5.52509e+06	0.672246	0.844911	1.0795	0.110364	insig
MEDP1123	C12H22O11	D-Turanose	Others	Others	547-25-1	43077.6	58452.9	42770.4	53683.8	46529.6	67741.6	36194.3	40664.1	72943	37307.5	26652.4	84276.1	0.671835	0.824544	0.954465	-0.0672354	insig
MEDN1005	C3H5O6P	Phosphoenolpyruvate	Organic acid And Its derivatives	Phosphoric acids	138-08-9	1.33958e+06	1.57215e+06	1.80837e+06	1.54831e+06	2.72962e+06	2.1983e+06	4.04139e+06	2.0061e+06	4.07198e+06	1.48371e+06	1.84171e+06	1.0038e+06	0.671742	0.382999	1.29048	0.367913	insig
MEDN2064	C3H7NO5S	L-Cysteic acid	Organic acid And Its derivatives	Organic acid And Its derivatives	498-40-8	1.01895e+07	1.02503e+06	1.34581e+07	4.89376e+06	6.30392e+06	1.11284e+06	2.54411e+06	2.88684e+06	5.83708e+06	4.32129e+06	785197	3.51883e+06	0.671536	0.230518	0.537903	-0.894583	insig
MW0152375	C22H38N4O9	Leu-Ile-Glu-Glu	Amino acid and Its metabolites	Small Peptide	-	6.24464e+06	1.45712e+07	2.36363e+06	7.33095e+06	1.37621e+07	2.50437e+07	1.75379e+07	5.90435e+06	1.48116e+07	8.21955e+06	1.83593e+07	1.02195e+07	0.671375	0.812637	1.08275	0.114699	insig
MW0142333	C24H49NO4S	2-docosanamidoethanesulfonic acid	Organic acid And Its derivatives	Sulfonic acids	-	494363	130816	39129.3	53883.1	25016.1	11964.7	9262.51	60622.2	168428	38242.7	9945.56	131474	0.670782	0.50928	0.553483	-0.853389	insig
MEDP2415	C2H7O4P	(2-Hydroxyethyl)phosphonic acid	Organic acid And Its derivatives	Organic acid And Its derivatives	22987-21-9	757901	657249	603446	476413	588515	432300	442504	796992	596999	389290	965425	1.01115e+06	0.667182	0.366388	1.19527	0.257338	insig
MEDP0401	C11H15N5O3S	5'-Deoxy-5'-(Methylthio) Adenosine	Nucleotide And Its metabolites	Nucleotide And Its metabolites	2457-80-9	897192	268628	1.53805e+06	984037	1.57938e+06	668654	1.69258e+06	349489	1.58487e+06	263085	99951.3	1.3789e+06	0.665891	0.800569	0.90447	-0.144855	insig
MEDP2021	C8H9NO3	4-Hydroxy-L-phenylglycine	Amino acid and Its metabolites	Amino acid derivatives	32462-30-9	84425.8	92274.6	81438.1	140724	150580	122114	79811	124840	112490	82932	73145.3	118888	0.664082	0.409108	0.881692	-0.181653	insig
MW0141493	C16H30O3	16-Oxo-palmitate	FA	Oxidized lipids	-	2.24914e+06	174072	722236	1.12449e+06	507714	151696	327962	386881	588237	775194	203276	353754	0.663816	0.296433	0.534615	-0.903429	insig
MEDP1076	C12H22O11	Kojibiose	Others	Others	2140-29-6	267749	216940	387265	327361	140478	167228	212357	136064	110212	271076	289597	289151	0.66324	0.527335	0.86824	-0.203834	insig
MEDP1947	C9H18N2O4	Ser-Ile	Amino acid and Its metabolites	Small Peptide	91086-51-0	1.31826e+07	3.16565e+06	1.35804e+07	1.15714e+07	1.26191e+07	2.60743e+06	1.27051e+07	8.73641e+06	1.10104e+07	9.69065e+06	4.37501e+06	1.56988e+07	0.663133	0.734279	1.09678	0.133268	insig
MEDP1888	C9H18N2O4	Ser-Leu	Amino acid and Its metabolites	Small Peptide	6665-16-3	1.31826e+07	3.16565e+06	1.35804e+07	1.15714e+07	1.26191e+07	2.60743e+06	1.27051e+07	8.73641e+06	1.10104e+07	9.69065e+06	4.37501e+06	1.56988e+07	0.663133	0.734279	1.09678	0.133268	insig
MEDN1524	C4H8O2	butyrate	Organic acid And Its derivatives	Organic acid And Its derivatives	107-92-6	395637	182076	192427	164226	313049	457370	284040	262092	109439	395117	566745	470930	0.661257	0.463772	1.225	0.292784	insig
MW0145803	C22H43N11O6	Asn-Leu-Arg-Arg	Amino acid and Its metabolites	Small Peptide	-	351222	4.39955e+06	197848	566463	614865	1.37065e+06	413418	595176	1.08233e+06	420843	340762	725325	0.661198	0.365501	0.47701	-1.06791	insig
MEDN0335	C4H6O4	Methylmalonic Acid	Organic acid And Its derivatives	Organic acid And Its derivatives	516-05-2	3.427e+07	1.55711e+06	4.97344e+07	2.12619e+07	2.18556e+07	1.82608e+06	1.86798e+07	3.40581e+07	1.56564e+07	3.35386e+07	1.20671e+07	6.47999e+06	0.661142	0.856083	0.923182	-0.115313	insig
MEDN0201	C4H6O4	Succinic Acid	Organic acid And Its derivatives	Organic acid And Its derivatives	110-15-6	3.427e+07	1.55711e+06	4.97344e+07	2.12619e+07	2.18556e+07	1.82608e+06	1.86798e+07	3.40581e+07	1.56564e+07	3.35386e+07	1.20671e+07	6.47999e+06	0.661142	0.856083	0.923182	-0.115313	insig
MEDP2603	C11H20N4O6	Nopaline	Amino acid and Its metabolites	Amino acid derivatives	22350-70-5	73752.9	145997	88666.8	89980.5	160153	134522	122900	194436	164872	74267.6	92676.6	138346	0.660577	0.516565	1.13624	0.184274	insig
MW0140489	C18H30O4	(9R,10E,12Z,15Z)-9-Hydroperoxyoctadeca-10,12,15-trienoate	FA	Oxidized lipids	-	9.62388e+06	2.1437e+06	9.48471e+06	1.1058e+07	6.95029e+06	4.60778e+06	8.78105e+06	5.90121e+06	5.3661e+06	8.89981e+06	1.35207e+06	4.06573e+06	0.660312	0.40593	0.783387	-0.352202	insig
MEDP1655	C21H30O4	21-Deoxycortisol	Hormones and hormone related compounds	Hormones and hormone related compounds	641-77-0	5.14468e+06	2.07803e+08	3.69766e+06	1.03344e+07	3.53827e+07	1.56337e+08	1.15418e+07	4.1677e+07	3.94541e+07	1.14033e+07	4.71263e+06	9.9716e+06	0.659758	0.231466	0.283641	-1.81786	insig
MW0122619	C16H22N2O3	Pro-Air	Aldehyde,Ketones,Esters	Ketones	72332-33-3	6.71283e+06	1.47735e+06	2.19426e+07	2.12974e+07	3.09843e+07	2.67878e+06	1.66968e+07	2.25638e+07	2.2627e+07	1.10247e+07	3.003e+06	9.49699e+06	0.658847	0.993028	1.00375	0.00539865	insig
MW0002136	C33H44O7	2,3-Diacetoxy-7,8-epoxy-24,29-dinor-1,3,5-friedelatriene-20-carboxylic acid	Benzene and substituted derivatives	Benzene and substituted derivatives	-	82070.1	61799.7	82684.5	390890	292029	95644.7	174554	272334	180002	104930	84399.3	183635	0.658559	0.989241	0.994762	-0.00757614	insig
MW0167940	C15H20O2	(3aR,5E,11aS)-6,10-dimethyl-3-methylidene-3a,4,7,8,11,11a-hexahydrocyclodeca[b]furan-2-one	Others	Others	-	2.05507e+06	168018	1.91272e+06	1.47576e+06	1.20864e+06	292638	1.69423e+06	2.43625e+06	2.07376e+06	1.07049e+06	238480	1.37199e+06	0.658414	0.531651	1.24918	0.320976	insig
MEDP1006	C4H9N3O2	Creatine	Organic acid And Its derivatives	Organic acid And Its derivatives	57-00-1	1.88974e+07	4.70298e+06	7.53153e+06	3.51186e+06	3.36213e+06	2.02115e+07	6.1105e+06	5.80581e+06	4.49276e+06	3.61966e+06	1.07754e+07	7.20767e+06	0.657696	0.352143	0.652928	-0.615003	insig
MEDP2340	C8H14N2O6	Thr-Asp	Amino acid and Its metabolites	Small Peptide	108320-97-4	2.37649e+06	315929	1.63745e+06	1.82894e+06	883821	312004	1.28832e+06	1.16627e+06	433754	2.0114e+06	1.348e+06	1.71923e+06	0.657682	0.81015	1.08326	0.115378	insig
MW0015775	C19H24O2	Androsta-1,4-diene-3,17-dione	Aldehyde,Ketones,Esters	Ketones	897-06-3	957748	174709	430665	1.37962e+06	1.63202e+06	883995	1.4612e+06	1.58249e+06	885956	1.26676e+06	246842	905021	0.657125	0.632474	1.16295	0.217789	insig
MW0150691	C29H52O12S3	Halistanol sulfate	Organic acid And Its derivatives	Sulfonic acids	103065-20-9	577591	6.18426e+06	1.44178e+06	5.2403e+06	2.0269e+07	5.84043e+06	5.27907e+06	1.18503e+07	5.6987e+06	2.21347e+06	3.88017e+06	5.15893e+06	0.65709	0.783439	0.861638	-0.214846	insig
MEDN0239	C6H12O7	D-Gluconic Acid	Carbohydrates and Its metabolites	Sugar acids	526-95-4	126238	71790.4	164377	94208.1	39664.7	11535.5	58380	38141.5	52365.1	124421	7.62403e+06	28866.4	0.654854	0.371804	15.6085	3.96426	insig
MEDP0899	C6H7N5	3-Methyladenine	Nucleotide And Its metabolites	Nucleotide And Its metabolites	5142-23-4	371990	1.41029e+06	950818	713332	1.18776e+06	1.49507e+06	985905	1.42308e+06	880892	1.06464e+06	1.50779e+06	716320	0.654794	0.737161	1.07331	0.102073	insig
MEDN1506	C10H14N2O6	3-Methyluridine	Nucleotide And Its metabolites	Nucleotide And Its metabolites	2140-69-4	195131	25446.7	115618	285195	113369	67782.4	43237.2	90473.8	137053	123517	478866	257772	0.654113	0.488019	1.40917	0.494847	insig
MW0000205	C29H35NO5	Cytochalasin A	Benzene and substituted derivatives	Benzene and substituted derivatives	14110-64-6	536633	889942	1.73912e+06	1.67139e+06	2.91301e+06	1.73368e+06	1.06048e+06	2.04093e+06	1.75996e+06	693114	702512	793814	0.654062	0.35127	0.74346	-0.427673	insig
MEDP2394	C11H20N2O5	Glu-Ile	Amino acid and Its metabolites	Small Peptide	5879-22-1	2.23329e+07	7.22381e+06	2.52678e+07	2.26396e+07	1.81538e+07	9.11581e+06	1.79091e+07	2.05874e+07	1.14685e+07	2.33817e+07	1.4755e+07	2.42654e+07	0.652961	0.739354	1.07288	0.101495	insig
MEDP2392	C11H20N2O5	Ile-Glu	Amino acid and Its metabolites	Small Peptide	42516-53-0	2.23329e+07	7.22381e+06	2.52678e+07	2.26396e+07	1.81538e+07	9.11581e+06	1.79091e+07	2.05874e+07	1.14685e+07	2.33817e+07	1.4755e+07	2.42654e+07	0.652961	0.739354	1.07288	0.101495	insig
MEDP2393	C11H20N2O5	Leu-Glu	Amino acid and Its metabolites	Small Peptide	16364-31-1	2.23329e+07	7.22381e+06	2.52678e+07	2.26396e+07	1.81538e+07	9.11581e+06	1.79091e+07	2.05874e+07	1.14685e+07	2.33817e+07	1.4755e+07	2.42654e+07	0.652961	0.739354	1.07288	0.101495	insig
MW0152149	C21H27NO4	Laudanosine	Heterocyclic compounds	Heterocyclic compounds	2688-77-9	52882.8	277006	67171.4	93586.5	153749	452389	185116	200053	236140	102988	215765	136547	0.651588	0.961391	0.981604	-0.0267865	insig
MW0159138	C15H25N3O6	Val-Pro-Glu	Amino acid and Its metabolites	Small Peptide	-	2.00392e+06	651942	1.41378e+06	5.04134e+06	1.38449e+06	2.39322e+06	2.02609e+06	869088	6.5822e+06	1.40358e+06	3.14921e+06	3.54864e+06	0.651544	0.474432	1.36389	0.44773	insig
MW0063656	C20H32O2	Stearidonic acid ethyl ester	FA	Others	119798-44-6	810906	37989.1	812727	1.42497e+06	506589	58289.8	522174	140272	96377.3	703098	35426	196183	0.650498	0.215907	0.463793	-1.10845	insig
MW0063337	C20H30O2	Retinyl ester	Aldehyde,Ketones,Esters	Esters	-	699135	2.32763e+06	824820	1.94069e+06	1.29733e+06	503693	1.26231e+07	889742	1.40614e+06	715518	777661	1.3723e+06	0.649889	0.42375	2.34212	1.22782	insig
MW0141057	C26H32O7	1,2-EPOXYDEACETOXYDIHYDROGEDUNIN	Others	Others	-	2.5682e+07	598682	3.64035e+07	9.94388e+06	9.18686e+06	235900	1.22236e+07	1.52233e+06	537006	1.63017e+07	351158	1.93388e+06	0.649718	0.250099	0.400602	-1.31976	insig
MEDP2488	C13H15NO2	Securinine	Amino acid and Its metabolites	Amino acid and Its metabolites	5610-40-2	869593	639107	1.16833e+06	972981	937466	962394	904248	1.00789e+06	772603	898333	872435	634022	0.649282	0.404193	0.917054	-0.124922	insig
MEDP2582	C14H18N2O3	Pro-Phe	Amino acid and Its metabolites	Amino acid derivatives	13589-02-1	3.7378e+06	382205	2.61216e+06	2.8893e+06	6.05843e+06	556216	1.25861e+07	1.40624e+06	1.32445e+06	3.59525e+06	759036	3.59629e+06	0.648872	0.577017	1.43306	0.5191	insig
MEDP0007	C6H12N2O4S2	L-Cystine	Amino acid and Its metabolites	Amino acids	56-89-3	556522	94948.7	148840	229204	182569	94821.1	186911	151681	306579	146045	295125	315508	0.647788	0.845351	1.07265	0.101179	insig
MW0143632	C15H16O3	5-Hydroxybisphenol A	Benzene and substituted derivatives	Benzene and substituted derivatives	79371-66-7	2.95751e+06	126870	2.48762e+06	2.6882e+06	3.43162e+06	1.55255e+06	3.56659e+06	2.53249e+06	3.02782e+06	2.99549e+06	489800	2.35626e+06	0.64749	0.670099	1.13018	0.176547	insig
MEDP0078	C18H20N2O3	Phe-Phe	Amino acid and Its metabolites	Small Peptide	2577-40-4	847396	314020	630184	988396	1.29873e+06	277724	1.04058e+06	795848	1.1064e+06	634082	296170	1.05659e+06	0.647171	0.655074	1.13158	0.178339	insig
MW0006719	C10H8O6	Dehydrochorismic acid	Benzene and substituted derivatives	Benzene and substituted derivatives	-	801921	3.25926e+06	2.65386e+06	2.65746e+06	3.09661e+06	4.14666e+06	2.1798e+06	2.59094e+06	3.17152e+06	1.4703e+06	1.47641e+06	1.90989e+06	0.647025	0.261617	0.770285	-0.376536	insig
MW0126021	C19H25ClN2O	Palonosetron hydrochloride	Others	Medicine	-	3.38871e+07	1.50933e+07	1.15511e+07	3.40497e+07	1.87576e+07	1.87762e+07	2.1659e+07	1.71995e+07	2.61929e+07	2.54979e+07	7.89078e+06	1.47897e+07	0.646819	0.533448	0.857055	-0.22254	insig
MW0063375	C20H28O3	Rosmaridiphenol	Terpenoids	Ditepenoids	-	9.30838e+06	244375	6.19056e+06	4.20068e+06	7.64283e+06	400017	7.70476e+06	5.36978e+06	9.73786e+06	7.93338e+06	262106	4.89381e+06	0.64678	0.534266	1.28281	0.359303	insig
MEDP1455	C23H38O4	MG(20:4/0:0/0:0)	GL	MG	-	1.12003e+06	360252	353876	206962	265377	383626	555712	838692	911286	179051	501014	406228	0.64549	0.523591	1.2609	0.334457	insig
MEDP1040	C20H41NO2	N-(2-hydroxyethyl)stearamide	Alcohol and amines	Amines	111-57-9	392739	223641	36245.3	99727.5	197733	88709.7	143471	122601	204995	138730	198648	253522	0.644019	0.947431	1.02231	0.0318271	insig
MW0006604	C21H26ClNO	Clemastine	Benzene and substituted derivatives	Benzene and substituted derivatives	15686-51-8	90984.5	1.45101e+06	876375	471118	1.6981e+06	1.65124e+06	299694	1.67436e+06	446957	354506	174166	780459	0.64262	0.266151	0.597892	-0.742043	insig
MW0103132	C28H38O6	Withaferin A	Others	Others	5119-48-2	6.01587e+06	8.21112e+06	2.28889e+06	9.34277e+06	4.36117e+06	3.20279e+06	9.13863e+06	3.15751e+06	2.51372e+06	1.02619e+07	3.04745e+07	3.64857e+06	0.642144	0.376679	1.7711	0.824646	insig
MEDN1455	C20H32O5	20-hydroxy Leukotriene B4	FA	Oxidized lipids	79516-82-8	620522	141668	780800	2.15095e+06	2.01017e+06	340608	1.98436e+06	3.31951e+06	1.19831e+06	1.4639e+06	70520.7	1.23442e+06	0.640812	0.361575	1.53374	0.617051	insig
MEDP2363	C12H25N5O3	Arg-Ile	Amino acid and Its metabolites	Small Peptide	62632-70-6	5.19298e+06	2.65335e+06	5.81137e+06	7.85539e+06	1.23786e+07	4.68933e+06	1.06311e+07	8.68633e+06	1.06323e+07	4.08535e+06	1.88868e+06	1.69481e+07	0.640492	0.381648	1.37041	0.454609	insig
MEDP2454	C6H7N5S	2-amino-6-methylmercaptopurine	Nucleotide And Its metabolites	Nucleotide And Its metabolites	1198-47-6	51630.4	126879	90452.9	89612.2	202693	350063	198303	182563	296417	51672.5	82642.3	345216	0.639751	0.542556	1.26937	0.344111	insig
MW0014149	C23H40O6	3-methoxy Limaprost	Organic acid And Its derivatives	Organic acid And Its derivatives	-	1.46848e+06	1.1808e+07	521411	1.53666e+07	3.79892e+06	1.2459e+07	749027	7.20139e+06	2.87678e+07	3.26275e+06	315707	2.27944e+06	0.639514	0.928938	0.937336	-0.0933623	insig
MW0004431	C17H20N2O	4,4'-Bis(dimethylamino)benzophenone	Benzene and substituted derivatives	Benzene and substituted derivatives	90-94-8	7.33197e+06	2.66068e+06	4.80681e+06	7.87686e+06	9.68909e+06	2.33868e+06	8.47322e+06	5.88486e+06	7.89107e+06	4.79028e+06	2.6459e+06	9.48972e+06	0.638522	0.65312	1.12883	0.17483	insig
MEDP1469	C11H17NO3	Isoprenaline	Hormones and hormone related compounds	Hormones and hormone related compounds	7683-59-2	43139.5	99138.2	65778.5	63563.6	123070	138789	109787	171229	171456	42450.1	80163.7	76852.1	0.637928	0.475581	1.22205	0.289303	insig
MEDP0168	C10H12N5O7P	Guanosine 3',5'-Cyclic Monophosphate	Nucleotide And Its metabolites	Nucleotide And Its metabolites	7665-99-8	2.6991e+06	823200	3.19282e+06	2.48966e+06	1.85833e+06	1.65699e+06	2.22341e+06	3.15366e+06	885447	5.34226e+06	2.4295e+06	1.9038e+06	0.636136	0.470142	1.25298	0.325368	insig
MW0109290	C18H18N2O7	Portulacaxanthin II	Organic acid And Its derivatives	Organic acid And Its derivatives	-	681344	302117	322049	798625	689617	296657	772058	546804	647479	784830	238242	543910	0.635829	0.569075	1.14332	0.193228	insig
MEDN0788	C20H30O5	LXA5	FA	Oxidized lipids	110657-98-2	169950	85759.4	502702	659932	643765	408210	145090	973760	329689	169374	75645.4	223769	0.635544	0.594626	0.776145	-0.365601	insig
MW0161620	C27H46O	(3S,10R,13R)-10,13-dimethyl-17-[(2R)-6-methylheptan-2-yl]-2,3,4,7,8,9,11,12,14,15,16,17-dodecahydro-1H-cyclopenta[a]phenanthren-3-ol	Alcohol and amines	Alcohols	-	6.48924e+06	4.36553e+07	3.85319e+06	5.64368e+07	1.57343e+07	2.28335e+07	4.48318e+06	3.14846e+07	6.88566e+07	1.87826e+07	934291	1.01578e+07	0.634187	0.862657	0.904007	-0.145594	insig
MEDP0523	C7H15NO3	DL-Carnitine	FA	CAR	541-15-1	1.36231e+06	1.96804e+06	1.06177e+06	1.43508e+06	1.83428e+06	2.86251e+06	1.57151e+06	1.49558e+06	2.81681e+06	701535	1.7305e+06	1.12219e+06	0.633229	0.652434	0.89682	-0.157109	insig
MW0011227	C28H42O4	(3beta,5alpha,9alpha,22E,24R)-5,9-Epidioxy-3-hydroxyergosta-7,22-dien-6-one	Aldehyde,Ketones,Esters	Ketones	-	7.02301e+06	3.73001e+06	6.01118e+06	6.14422e+06	6.5136e+06	7.19293e+06	9.15103e+06	5.9711e+06	4.82961e+06	7.93024e+06	1.9066e+06	3.96023e+06	0.633098	0.701384	0.921722	-0.117597	insig
MW0105953	C12H22N4O6	Asp-Gly-Lys	Amino acid and Its metabolites	Small Peptide	-	191950	1.00796e+06	327963	709824	602914	1.05833e+06	619205	589176	473172	388838	422438	297975	0.632782	0.267282	0.715786	-0.482401	insig
MW0006137	C10H12N2O3S	Bentazon	Benzene and substituted derivatives	Benzene and substituted derivatives	25057-89-0	616387	4.60396e+06	2.9693e+06	3.52244e+06	5.27471e+06	8.59784e+06	2.60174e+06	4.15147e+06	4.00889e+06	1.47345e+06	1.19731e+06	2.72523e+06	0.632579	0.230754	0.631554	-0.663022	insig
MEDP2479	C14H16N2O2	Cyclo(Phe-Pro)	Amino acid and Its metabolites	Small Peptide	14705-60-3	169071	50367.4	58502.3	46006.6	73052.3	66193.6	63181.7	36023.5	89134.4	64626.9	49557.7	75800.4	0.632034	0.509958	0.816775	-0.29199	insig
MEDP1926	C14H16N2O2	Cyclo(Pro-Phe)	Amino acid and Its metabolites	Small Peptide	3705-26-8	169071	50367.4	58502.3	46006.6	73052.3	66193.6	63181.7	36023.5	89134.4	64626.9	49557.7	75800.4	0.632034	0.509958	0.816775	-0.29199	insig
MEDN0478	C3H5NO4	Aminomalonic Acid	Organic acid And Its derivatives	Organic acid And Its derivatives	1068-84-4	1.51974e+06	131817	2.03508e+06	1.05519e+06	1.00579e+06	138587	898313	1.46523e+06	744391	1.51207e+06	667618	394708	0.631788	0.926748	0.965366	-0.0508514	insig
FDATP00260	C5H6ClN5	Adenine HCl	Others	FDA	2922-28-3	2.92208e+06	2.29429e+07	2.26964e+07	4.16807e+06	9.66605e+06	7.53669e+06	1.49356e+07	6.01522e+06	7.88535e+06	4.11609e+06	8.61225e+06	3.59555e+06	0.631655	0.339962	0.64577	-0.630908	insig
MW0151642	C16H29N3O6	Ile-Val-Glu	Amino acid and Its metabolites	Small Peptide	-	1.18873e+07	2.60309e+06	9.02781e+06	3.57095e+07	9.75803e+06	4.12899e+06	1.20144e+07	1.72889e+07	1.18335e+07	7.50941e+06	4.15432e+06	2.85746e+07	0.631235	0.824874	1.11298	0.154427	insig
MW0110417	C20H32N6O4	Val-Phe-Arg	Amino acid and Its metabolites	Small Peptide	-	3.59255e+06	1.75482e+06	2.32212e+06	2.5188e+06	1.88787e+06	2.49483e+06	1.67288e+06	4.15468e+06	3.01936e+06	2.52381e+06	692905	1.9356e+06	0.630994	0.86803	0.96076	-0.0577524	insig
MEDP1896	C13H23N3O4	Val-Pro-Ala	Amino acid and Its metabolites	Small Peptide	85807-20-1	140320	629155	387399	250605	828647	1.16425e+06	436123	572398	405851	272872	67518.7	572059	0.628654	0.341739	0.684283	-0.547335	insig
MW0152350	C13H25N3O4	Leu-Gly-Val	Amino acid and Its metabolites	Small Peptide	-	1.95731e+06	6.08754e+06	3.41678e+06	3.51875e+06	7.57036e+06	1.48961e+07	4.88055e+06	6.35692e+06	4.90866e+06	2.70198e+06	2.05588e+06	4.2209e+06	0.628528	0.348728	0.670949	-0.575726	insig
MW0149878	C11H21N3O4	Gln-Leu	Amino acid and Its metabolites	Small Peptide	34027-65-1	1.89271e+06	303226	1.41103e+06	1.37712e+06	1.27692e+06	401693	1.30887e+06	1.27064e+06	1.02633e+06	1.3774e+06	390501	2.48651e+06	0.626654	0.608448	1.17974	0.238471	insig
MW0155439	C18H18N2O6	Phe-Abu-OH	Amino acid and Its metabolites	Small Peptide	-	2.53442e+06	1.11603e+06	190961	415511	261538	387625	1.79983e+06	220715	431926	670736	1.47375e+06	1.40194e+06	0.626178	0.696826	1.22275	0.290125	insig
MW0144691	C24H35N7O5	Ala-Phe-His-Lys	Amino acid and Its metabolites	Small Peptide	-	25932.7	28531.9	492635	176650	366056	50820.7	180317	153110	141967	155876	63727.5	132268	0.625166	0.551425	0.725272	-0.463406	insig
MEDN1972	C9H16N2O5	Asp-Val	Amino acid and Its metabolites	Small Peptide	13433-04-0	165935	10616	159149	123082	104717	23804.7	113907	61881.7	55974.7	188279	38957.7	173506	0.6235	0.845371	1.07697	0.106976	insig
MEDP2332	C6H15NO3	Triethanolamine	Alcohol and amines	Alcohols	102-71-6	547679	1.29352e+06	520480	686924	951336	914632	725448	1.05957e+06	1.07936e+06	650210	812228	946987	0.622943	0.680323	1.0731	0.10178	insig
MW0156917	C10H19N3O6	Ser-Thr-Ala	Amino acid and Its metabolites	Small Peptide	-	665281	413014	1.62533e+06	1.59907e+06	1.3342e+06	767157	1.54888e+06	1.45559e+06	928480	904000	857926	909948	0.620892	0.895653	1.03135	0.044534	insig
MEDP0898	C8H9NO3	Pyridoxal	Heterocyclic compounds	Pteridines and derivatives	66-72-8	1.26917e+06	2.97365e+06	1.38714e+06	1.92264e+06	1.42391e+06	1.63904e+06	2.26802e+06	1.99162e+06	1.45877e+06	1.62154e+06	3.38873e+06	1.37893e+06	0.620762	0.549539	1.14055	0.189733	insig
MEDP1672	C17H31N3O6	Leu-Leu-Glu	Amino acid and Its metabolites	Small Peptide	20274-83-3	3.35909e+06	1.15241e+06	2.96518e+06	2.75318e+06	3.17216e+06	1.05412e+06	3.64978e+06	3.09494e+06	1.47698e+06	2.53374e+06	1.56938e+06	3.61305e+06	0.619948	0.678086	1.1025	0.140777	insig
MW0151358	C28H42N6O10	Ile-Asn-Val-Asp-Tyr	Amino acid and Its metabolites	Small Peptide	-	2.06853e+06	715124	3.93323e+06	2.53358e+06	4.93742e+06	1.58916e+06	3.41093e+06	2.17651e+06	3.37074e+06	3.2344e+06	1.99053e+06	1.65526e+06	0.619667	0.98892	1.00389	0.00559576	insig
MEDP2453	C12H24N2O3	Ile-Leu	Amino acid and Its metabolites	Small Peptide	26462-22-6	4.6206e+07	1.29296e+07	4.8043e+07	5.13251e+07	5.29893e+07	1.63194e+07	46572526	3.36094e+07	3.01248e+07	5.50821e+07	1.73304e+07	8.15447e+07	0.619469	0.620077	1.16001	0.214133	insig
MEDP2307	C12H24N2O3	Leu-Leu	Amino acid and Its metabolites	Small Peptide	3303-31-9	4.6206e+07	1.29296e+07	4.8043e+07	5.13251e+07	5.29893e+07	1.63194e+07	46572526	3.36094e+07	3.01248e+07	5.50821e+07	1.73304e+07	8.15447e+07	0.619469	0.620077	1.16001	0.214133	insig
MW0142888	C6H11O9P	3-Dehydro-D-glucose 6-phosphate	Organic acid And Its derivatives	Organic acid And Its derivatives	-	2.71142e+07	2.43212e+07	3.14555e+07	2.48842e+07	2.65258e+07	8.81704e+06	2.74984e+07	1.25099e+07	1.65996e+07	2.46524e+07	2.9665e+07	1.03077e+07	0.619198	0.446536	0.847086	-0.239419	insig
MW0141401	C27H42O3	14alpha-Hydroxy-5beta-cholest-7-ene-3,6-dione	Alcohol and amines	Alcohols	-	1.89328e+06	3.20003e+06	188603	2.07955e+06	304280	671917	633193	713967	8.4431e+06	1.62746e+06	655670	3.32086e+06	0.618943	0.411751	1.84635	0.884677	insig
MW0010043	C17H27NO2	Venlafaxine	Benzene and substituted derivatives	Phenolics	93413-69-5	528498	2.71011e+06	1.43519e+06	1.05444e+06	1.8347e+06	1.901e+06	2.52116e+06	2.14033e+06	1.64525e+06	421453	448158	933645	0.618682	0.645474	0.856936	-0.22274	insig
MEDP1929	C8H12N2O3	Cyclo(Ser-Pro)	Amino acid and Its metabolites	Small Peptide	-	165302	126651	203634	150663	217495	292625	193589	293849	183549	93308.7	69448	210215	0.61814	0.660766	0.902789	-0.147539	insig
MW0016074	C24H30O5	Beraprost	FA	Others	88475-69-8	2.64103e+06	4.93574e+06	751176	1.49028e+07	4.81273e+06	4.07149e+06	1.71535e+06	4.93741e+06	9.47985e+06	1.61003e+06	857221	3.9822e+06	0.616818	0.525834	0.703162	-0.50807	insig
MW0140257	C27H42O2	(25R)-26-Oxocholest-4-en-3-one	Aldehyde,Ketones,Esters	Ketones	-	210913	2.86456e+06	224976	366087	372169	290700	292997	1.56954e+06	299518	268431	2.19313e+06	567607	0.612889	0.797513	1.19906	0.261905	insig
MW0012489	C20H32O5	15-oxo-5S,6R-dihydroxy-7E,9E,11Z-eicosatrienoic acid	FA	Oxidized lipids	-	7.32889e+06	3.8772e+06	3.51192e+06	8.57616e+06	2.03584e+07	4.48422e+06	6.82821e+06	7.20405e+06	3.94103e+06	4.80134e+06	6.95421e+06	2.23946e+06	0.612405	0.361399	0.664114	-0.590497	insig
MW0111857	C18H26O2	1-Phenyl-1,3-dodecanedione	Aldehyde,Ketones,Esters	Ketones	-	261405	34195.5	109697	305652	233721	39054.8	151493	154351	436264	269855	45765.8	136432	0.612386	0.644418	1.21392	0.27967	insig
MEDP2534	C4H5NO2S2	Raphanusamic acid	Organic acid And Its derivatives	Organic acid And Its derivatives	98169-56-3	206192	1.6229e+06	1.31683e+06	885090	3.16339e+06	1.536e+06	1.22814e+06	3.00805e+06	1.95498e+06	980241	580844	1.62732e+06	0.612216	0.843254	1.07436	0.103477	insig
MW0017135	C19H36O2	cis-12-Octadecenoic acid methyl ester	FA	FFA	2733-86-0	563528	3.82731e+06	126798	333692	311041	1.32064e+06	177496	1.24189e+06	1.03494e+07	874464	190057	5.14991e+06	0.608777	0.314556	2.7739	1.47192	insig
MW0142211	C22H32O2	2alpha-Methylpregn-4-ene-3,20-dione	Aldehyde,Ketones,Esters	Ketones	2636-91-1	1.3299e+06	9.08107e+07	810652	2.94258e+06	1.14841e+07	5.8666e+07	3.3589e+06	1.24548e+07	1.47829e+07	3.60009e+06	1.50761e+06	2.3837e+06	0.608454	0.230197	0.229385	-2.12415	insig
MEDP2303	C6H9N3O3	6-Diazo-5-oxo-L-norleucine	Amino acid and Its metabolites	Amino acid derivatives	157-03-9	194598	507179	363623	509193	589998	639894	562844	641352	840185	200501	379804	786954	0.607608	0.421174	1.21649	0.28273	insig
FDATP01137	C19H34ClNO2	Fingolimod hydrochloride	Others	FDA	162359-56-0	198994	625208	443024	392224	979348	1.04374e+06	501926	600772	781975	266730	265271	336417	0.60596	0.365172	0.747606	-0.41965	insig
MW0141684	C22H38O5	1a,1b-dihomo PGF2	Hormones and hormone related compounds	Hormones and hormone related compounds	57944-39-5	6.76564e+06	3.25013e+06	1.31276e+06	4.09778e+06	534969	1.10313e+06	1.45028e+06	1.56516e+06	7.30172e+06	4.29905e+06	1.81927e+06	7.69586e+06	0.605637	0.458128	1.41413	0.499917	insig
MW0141518	C20H32O6	17-6-keto PGF1	Hormones and hormone related compounds	Hormones and hormone related compounds	68324-95-8	224828	135540	269361	382740	149636	36218.9	268516	94905.3	111764	222708	603963	213743	0.605605	0.57207	1.26477	0.338871	insig
MEDP1684	C21H33N3O4	Leu-Leu-Phe	Amino acid and Its metabolites	Small Peptide	74479-02-0	1.84884e+06	366572	1.15564e+06	2.48891e+06	2526791	748130	1.31447e+06	2.36135e+06	1.42439e+06	1.02329e+06	863749	2.65848e+06	0.604061	0.861857	1.05592	0.0785048	insig
MW0017104	C22H30O5	Cicaprost	Organic acid And Its derivatives	Organic acid And Its derivatives	94079-80-8	4.40716e+06	437733	1.93684e+06	6.48428e+06	1.00607e+07	551823	4.67361e+06	4.813e+06	4.24288e+06	4.38303e+06	559191	3.69176e+06	0.603704	0.88496	0.936552	-0.0945689	insig
MEDN1835	C10H13NO2	alpha-Methyl-DL-phenylalanine	Amino acid and Its metabolites	Amino acid derivatives	1132-26-9	3250.65	17378.4	11119.9	13639.1	24070.7	17208	20445.9	15469.9	27903.4	14279.5	4722.33	19757.4	0.602404	0.547758	1.1836	0.243176	insig
MW0054405	C14H22O	Longicamphenylone	Aldehyde,Ketones,Esters	Esters	-	1.18646e+07	1.0112e+07	1.16153e+07	1.13013e+07	1.1058e+07	1.05861e+07	1.20677e+07	1.15611e+07	1.129e+07	1.15239e+07	1.11366e+07	1.02656e+07	0.60195	0.560912	1.01965	0.0280758	insig
MW0122916	C26H20O7	Artomunoxanthentrione	Aldehyde,Ketones,Esters	Ketones	-	16555.3	44574	43800.9	64006.1	137812	111176	46848.3	100504	57829.5	35421.2	15593.1	32378.2	0.601407	0.358921	0.690496	-0.534296	insig
MW0143459	C28H45N3O5	4S,5S-antillatoxin A	Benzene and substituted derivatives	Benzene and substituted derivatives	-	74447.3	334574	15907.3	54015.6	112210	297355	88930.3	63139.4	439121	11779.8	35225.1	80354.7	0.601075	0.745929	0.808714	-0.306299	insig
MW0063793	C24H38O2	Tetracosapentaenoic acid(24:5n-6)	FA	FFA	-	160737	3.04108e+06	321369	241701	255956	547576	463518	236462	436358	123316	621239	321346	0.598904	0.433123	0.482057	-1.05272	insig
MEDN0210	C6H12O5	1,5-Anhydro-D-Glucitol	Carbohydrates and Its metabolites	Sugar alcohols	154-58-5	100174	342120	126482	177977	373763	457374	211672	326211	513416	117689	218513	453104	0.598641	0.624696	1.1665	0.222183	insig
MEDN0232	C6H12O5	L-Rhamnose	Carbohydrates and Its metabolites	Sugars	3615-41-6	100174	342120	126482	177977	373763	457374	211672	326211	513416	117689	218513	453104	0.598641	0.624696	1.1665	0.222183	insig
MW0014593	C21H34O3	5(6)-Epoxy-8Z,11Z,14Z-eicosatrienoic acid,methyl ester	Organic acid And Its derivatives	Organic acid And Its derivatives	122799-12-6	2.68056e+06	1.79606e+07	1.62505e+06	6.95311e+06	4.70045e+06	1.41842e+07	1.84381e+06	1.09316e+07	1.46694e+07	6.65092e+06	1.0982e+06	2.95904e+06	0.597512	0.64637	0.793135	-0.334362	insig
MEDP2451	C18H20N2O4	Phe-Tyr	Amino acid and Its metabolites	Small Peptide	17355-18-9	6.01365e+06	1.2454e+06	3.18453e+06	3.63084e+06	4.69712e+06	883279	4.40387e+06	2.61985e+06	4.4716e+06	2.49754e+06	1.79082e+06	5.10735e+06	0.597124	0.837504	1.0629	0.0880001	insig
MEDP2094	C7H9NO	4-hydroxybenzylamine	Benzene and substituted derivatives	Benzene and substituted derivatives	696-60-6	16217.7	32845.1	13466.7	26395.1	40361.5	23565	16700	28024.2	32600.3	7822.23	11435.8	39021.5	0.596693	0.670513	0.887166	-0.172725	insig
MW0153068	C16H33N5O5	Lys-Lys-Thr	Amino acid and Its metabolites	Small Peptide	-	3.00607e+07	1.57183e+07	1.54367e+07	3.65926e+07	8.05998e+07	1.93377e+07	2.74199e+07	3.17926e+07	1.55013e+07	2.12426e+07	3.00353e+07	9.56325e+06	0.593247	0.370822	0.685501	-0.544769	insig
MEDN1913	C11H23N3O3	Val-Lys	Amino acid and Its metabolites	Small Peptide	22677-62-9	102712	104270	50930.4	78610.2	114256	113584	87342.3	99462.6	202215	53936.3	81130.9	185866	0.593088	0.39664	1.25797	0.3311	insig
MEDP2449	C17H23N3O4	Phe-Ala-Pro	Amino acid and Its metabolites	Small Peptide	72460-59-4	656341	122606	560762	632755	802122	405062	399130	646250	375740	169313	93920.3	919326	0.593081	0.559154	0.818858	-0.288315	insig
MW0122967	C31H24O10	Aurasperone D	Aldehyde,Ketones,Esters	Ketones	-	769885	110160	218079	587194	310758	79362.5	227921	331752	97969.8	221109	778189	1.12775e+06	0.592993	0.567276	1.34174	0.424101	insig
MW0140566	C19H32N2O5	(R-(R*,R*))-3-(3-Cyclohexyl-3-hydroxypropyl)-2,5-dioxo-imidazolidine-4-heptanoic acid	Organic acid And Its derivatives	Organic acid And Its derivatives	65705-83-1	2.1304e+06	1.39182e+06	750679	1.24389e+06	438066	765664	480514	272129	2.03435e+06	1.17821e+06	493456	2.25384e+06	0.591701	0.997571	0.998805	-0.00172463	insig
MEDP2211	C16H15N3O3	4-(4-Hydroxyaniline)-6,7-Dimethoxyquinazoline-JANEX-1	Benzene and substituted derivatives	Benzene and substituted derivatives	202475-60-3	813496	892809	893816	961489	852302	800871	833347	817845	955581	954081	938368	861397	0.591611	0.50828	1.02797	0.0397923	insig
MEDP0146	C6H7N5	1-Methyladenine	Nucleotide And Its metabolites	Nucleotide And Its metabolites	5142-22-3	167417	470660	95101.4	134104	159341	423930	218648	515641	129199	101242	684834	295264	0.591243	0.492384	1.34075	0.42304	insig
MEDP1132	C7H15NO2	3-Carboxypropyltrimethylammonium	Organic acid And Its derivatives	Organic acid And Its derivatives	6249-56-5	9.97427e+06	7.58634e+06	6.0424e+06	1.43438e+07	2.93508e+07	8.43155e+07	2.64211e+07	4.72411e+07	1.55574e+07	5.85038e+06	3.24727e+07	1.77093e+07	0.590953	0.940239	0.958043	-0.0618373	insig
MW0141634	C26H38O5	17-phenyl trinor PGF2 isopropyl ester	Hormones and hormone related compounds	Hormones and hormone related compounds	130209-76-6	3.27293e+06	25175.9	4.21405e+06	2.2613e+06	1.50971e+06	79108.8	651159	177088	246158	1.60221e+06	27921.4	998096	0.590415	0.130665	0.325871	-1.61763	insig
MEDL02562	C30H48O5	Euscaphic acid	Terpenoids	Triterpene	53155-25-2	325719	802172	109294	583804	423451	570941	643117	365059	260633	458196	1.40122e+06	368492	0.589895	0.581653	1.242	0.31267	insig
MEDP0037	C13H16N2O5	Asp-Phe	Amino acid and Its metabolites	Small Peptide	13433-09-5	1.04905e+06	83173.2	570069	549900	496570	96324.7	612016	284105	263463	794736	233213	715282	0.589451	0.958272	1.02029	0.0289805	insig
MW0049211	C27H40O2	delta-Tocotrienol	Alcohol and amines	Alcohols	25612-59-3	1.27808e+06	5.12728e+06	1.12278e+06	2.46355e+06	2.6543e+06	3.83888e+06	3.30752e+06	3.32623e+06	5.68558e+06	1.55526e+06	1.94211e+06	3.2327e+06	0.58939	0.63031	1.15557	0.208602	insig
MEDN0041	C8H15NO3	Hexanoyl Glycine	Amino acid and Its metabolites	Amino acid derivatives	24003-67-6	7212.48	6437.34	10437.3	5749.43	21903.7	58501.1	6536.14	45179.8	6513.37	11223.1	100504	8589.61	0.588114	0.535047	1.61959	0.695631	insig
MEDP1780	C15H22N2O3	Leu-Phe	Amino acid and Its metabolites	Small Peptide	3063-05-6	6.2126e+06	1.72378e+06	5.68708e+06	6.76313e+06	6.00799e+06	1.86014e+06	5.57102e+06	4.65279e+06	4.4348e+06	5.36022e+06	2.2784e+06	8.71548e+06	0.587566	0.724171	1.09761	0.134368	insig
MW0138455	C16H28O2	Isoambrettolide	Heterocyclic compounds	Heterocyclic compounds	-	206822	24157	204010	262653	121394	37030.2	159008	37312.5	75182.3	163745	41594.4	61179	0.587325	0.285091	0.62848	-0.670061	insig
MEDN0289	C4H9NO2	3-Aminoisobutanoic Acid	Amino acid and Its metabolites	Amino acids	144-90-1	8461.11	2016.66	1441.76	3982.54	6562.58	23695.7	11581.9	8007.92	16945.4	3576.23	1408.11	14553.2	0.586553	0.703478	1.21474	0.280645	insig
MW0147425	C55H70MgN4O6	Chlorophyll b	Heterocyclic compounds	Heterocyclic compounds	519-62-0	13297.9	57395.4	3870.5	12621.2	19924.9	46133.1	29521.2	12301.2	34077.1	3429.48	16184.8	8728.15	0.586017	0.436523	0.68024	-0.555885	insig
MEDP1953	C9H11N5O4	Eritadenine	Heterocyclic compounds	Pteridines and derivatives	23918-98-1	10593.6	21879.3	33561.5	20525.2	20644.2	26730.7	16324	48250.5	71571.9	10567.9	15436.3	36915.2	0.585045	0.327618	1.48629	0.571718	insig
MW0055074	C21H36O5	Misoprostol (free acid)	FA	Oxidized lipids	112137-89-0	1.75049e+06	2.89673e+06	2.87804e+06	5.54418e+06	4.37808e+06	1.92495e+06	4.08226e+06	6.69316e+06	1.64432e+06	2.101e+06	1.7888e+06	959458	0.584602	0.748868	0.89142	-0.165824	insig
MW0149653	C14H24N4O7	Gln-Asp-Val	Amino acid and Its metabolites	Small Peptide	-	59629.9	209114	50714.1	147707	155417	76758.7	140206	110166	158238	93075.5	291793	51881.5	0.584102	0.581205	1.2088	0.273572	insig
MEDP1791	C11H15ClN2O5	Nicotinamide riboside chloride	Nucleotide And Its metabolites	Nucleotide And Its metabolites	23111-00-4	400800	1.74406e+06	610081	757381	1.08884e+06	1.44641e+06	601230	2.77367e+06	1.42151e+06	489017	775058	2.0363e+06	0.583554	0.446971	1.33885	0.420996	insig
MW0155072	C22H34N6O6	Phe-Ala-Asn-Lys	Amino acid and Its metabolites	Small Peptide	-	965516	56341.7	2.25404e+06	867708	2.4184e+06	800511	1.70261e+06	2.67488e+06	704288	1.23355e+06	188463	1.56086e+06	0.583395	0.824529	1.09537	0.131412	insig
MW0007213	C19H24N2O4	Formoterol	Benzene and substituted derivatives	Benzene and substituted derivatives	67346-49-0	763871	5.47785e+06	2.94968e+06	2.49357e+06	7.1333e+06	8.60808e+06	3.24983e+06	6.1912e+06	3.01054e+06	1.87823e+06	672671	3.28133e+06	0.582208	0.319458	0.666651	-0.584996	insig
MW0102960	C27H46O5	3alpha,7alpha,12alpha-Trihydroxy-5beta-cholestanoate	Bile acids	Bile acids	547-98-8	348415	9.54482e+06	732463	1.86057e+06	2.08854e+06	4.12535e+06	2.38612e+06	2.42837e+06	2.65389e+06	1.43185e+06	7.20758e+06	1.59742e+06	0.581215	0.922108	0.946796	-0.0788747	insig
MEDN1134	C7H4N2O7	2-Hydroxy-3,5-dinitrobenzoic acid	Organic acid And Its derivatives	Organic acid And Its derivatives	609-99-4	641171	124664	651492	271263	528535	177697	310278	496476	671975	488773	203638	389042	0.580382	0.819688	1.06905	0.0963283	insig
MW0062149	C21H28O5	Prednisolone	Hormones and hormone related compounds	Hormones and hormone related compounds	50-24-8	600367	1.86376e+06	1.71455e+06	1.48503e+06	2.55878e+06	2.82388e+06	2.65545e+06	3.72148e+06	2.41244e+06	1.24692e+06	735197	2.49009e+06	0.579659	0.513755	1.20054	0.263682	insig
MEDP0356	C7H7NO2	Methyl-Nicotinate	CoEnzyme and vitamins	CoEnzyme and vitamins	93-60-7	191477	43500.1	298105	676728	1.10883e+06	95472.2	448441	177183	171219	179025	16950.6	208650	0.579334	0.298495	0.497685	-1.00669	insig
MW0164398	C29H46O2	(3S,4S,10S,13R)-3-hydroxy-10,13-dimethyl-17-[(2R)-6-methyl-5-methylideneheptan-2-yl]-2,3,4,5,6,9,11,12,14,15,16,17-dodecahydro-1H-cyclopenta[a]phenanthrene-4-carbaldehyde	Others	Others	-	2.78757e+06	1.08715e+07	1.2613e+06	6.06546e+06	5.41354e+06	1.08584e+07	4.90866e+06	8.48247e+06	1.47675e+07	4.31312e+06	2.67194e+06	1.00356e+07	0.579199	0.602412	1.21261	0.278117	insig
MW0158456	C23H31N5O11	Tyr-Glu-Gln-Asp	Amino acid and Its metabolites	Small Peptide	-	26079.7	5901.58	7434.21	15600.2	19717.7	4639.28	9286.45	8899.73	10559.9	10817.6	40760.3	13126.2	0.578673	0.713121	1.17736	0.235555	insig
MEDN0342	C10H18O4	Sebacate	Organic acid And Its derivatives	Organic acid And Its derivatives	111-20-6	2.48e+06	6.77516e+06	1.92712e+07	1.15321e+07	1.46648e+07	4.24687e+06	9.1263e+06	2.36688e+07	4.40642e+06	1.14583e+07	8.80084e+06	6.43511e+06	0.578447	0.835058	1.08353	0.115735	insig
MEDN1899	C24H40O4	Deoxycholic acid	Bile acids	Bile acids	302-95-4	7.63764e+07	2.4825e+08	1.97866e+07	9.10144e+07	9.53332e+07	1.96834e+08	2.35154e+08	9.56312e+07	1.69806e+08	5.49315e+07	1.57048e+08	9.45906e+07	0.575271	0.767691	1.10936	0.149723	insig
MW0153158	C24H37N5O8	Lys-Thr-Phe-Glu	Amino acid and Its metabolites	Small Peptide	-	409774	2.43383e+06	1.0924e+06	1.46573e+06	2.87062e+06	4.99449e+06	3.49524e+06	4.43278e+06	2.41931e+06	1.78904e+06	447868	3.27768e+06	0.574612	0.633777	1.1956	0.25774	insig
FDATN01027	C17H22N4O	Minaprine	Heterocyclic compounds	Heterocyclic compounds	25905-77-5	775196	764299	3.5671e+06	1.78936e+06	2.69261e+06	540397	1.94492e+06	2.49743e+06	1.02644e+06	1.54506e+06	83427.8	794514	0.573759	0.558109	0.779131	-0.360062	insig
MEDN1117	C17H27N3O17P2	Uridine-5'-diphospho-N-acetylgalactosamine disodium salt	Nucleotide And Its metabolites	Nucleotide And Its metabolites	528-04-1	1925.35	10158	107945	26183.9	24337.7	4997.75	109841	7784.98	13180.5	37816.2	5286.28	24315.9	0.573057	0.872172	1.12918	0.175273	insig
MEDP2040	C9H11N3O4	Ancitabine	Heterocyclic compounds	Heterocyclic compounds	10212-25-6	28963.8	91341.8	45709.2	46457.6	79099.1	130331	71412.4	87791.4	72068	35581.1	28009.3	42484.8	0.572596	0.458751	0.799584	-0.322678	insig
MEDN0439	C6H11NO4	N-Acetylthreonine	Amino acid and Its metabolites	Amino acid derivatives	17093-74-2	224928	573431	279496	200079	304393	147540	686337	415671	149537	216610	266881	323617	0.57251	0.593932	1.19006	0.25104	insig
MW0054208	C15H22O3	Ketopelenolide a	Heterocyclic compounds	Heterocyclic compounds	-	448884	508976	431324	472166	369470	418146	457826	403200	418991	458139	559832	483332	0.5721	0.47731	1.04996	0.0703402	insig
MEDP2236	C20H22N2O4	URB937	Benzene and substituted derivatives	Benzene and substituted derivatives	1357160-72-5	445147	5.6685e+06	244654	505499	653814	4.01499e+06	7.26424e+06	557323	2.97858e+06	531648	1.17905e+06	1.45667e+06	0.571659	0.780521	1.21113	0.276357	insig
MW0154728	C28H50N4O3S	Oleic Acid-biotin	FA	Others	-	2.83615e+06	3.91531e+06	2.85709e+06	2.34392e+06	2.54077e+06	2.5578e+06	2.81633e+06	3.28709e+06	2.94566e+06	5.20225e+06	2.51868e+06	2347757	0.571114	0.496582	1.12121	0.165056	insig
MW0143526	C20H30O4	5,6-Epoxytetraene	Organic acid And Its derivatives	Organic acid And Its derivatives	-	2.99814e+06	1.37188e+07	579494	4.19966e+06	4.15474e+06	1.08835e+07	1.23643e+07	4.40528e+06	8.63451e+06	2.31641e+06	7.15032e+06	4.04287e+06	0.569565	0.880006	1.06512	0.0910226	insig
MEDP0081	C10H12N2O	Serotonin	Tryptamines,Cholines,Pigments	Tryptamines	50-67-9	4855.24	304728	39547.1	243405	62218.2	2.63269e+06	90436.8	361660	262190	54684.5	188585	733119	0.569089	0.562006	0.514283	-0.959365	insig
MW0010827	C20H32O4	(13E)-(15S)-15-Hydroxy-9-oxoprosta-10,13-dienoate	Hormones and hormone related compounds	Hormones and hormone related compounds	14152-28-4	596888	50915	623103	474754	812558	63874	260627	331213	1.42278e+06	1.2066e+06	55328.8	544663	0.567434	0.462996	1.45731	0.543312	insig
MW0159040	C17H33N3O4	Val-Ile-Ile	Amino acid and Its metabolites	Small Peptide	-	6.30474e+06	1.79349e+06	6.61056e+06	9.43491e+06	1.03458e+07	3.46296e+06	1.56216e+07	1.00579e+07	4.5082e+06	2.44038e+06	3.43141e+06	1.21491e+07	0.566361	0.523973	1.27024	0.345097	insig
MW0053597	C20H24O10	Ginkgolide J	Heterocyclic compounds	Heterocyclic compounds	-	6740.93	45834.2	42367.6	42827	70715.6	78626.2	50504.4	73342.5	61424.1	26501.1	23836.7	66456.4	0.565547	0.856503	1.05208	0.0732485	insig
MEDP2366	C16H28N2O11	N,N'-Diacetyl-Chitobiose	Carbohydrates and Its metabolites	Carbohydrates and Its metabolites	35061-50-8	162592	170069	106858	324763	202975	331094	163685	476525	316195	87944.2	295948	286613	0.564996	0.43129	1.25306	0.325454	insig
MW0130722	C19H25NO3	2-Benzyl-4-(octahydro-2H-isoindol-2-yl)-4-oxobutanoic acid	Organic acid And Its derivatives	Organic acid And Its derivatives	145375-43-5	695705	270014	684070	643347	747488	478398	698422	937782	438511	423058	425593	1.03867e+06	0.564617	0.597625	1.12589	0.171067	insig
MEDP1955	C10H13N5O3	3'-Deoxyadenosine	Nucleotide And Its metabolites	Nucleotide And Its metabolites	73-03-0	113116	315217	326288	220545	332075	268058	139109	406923	94322.9	67545.5	750626	156703	0.564305	0.955197	1.02535	0.0361124	insig
MW0144803	C20H40N8O5	Ala-Val-Lys-Arg	Amino acid and Its metabolites	Small Peptide	-	553889	5.05263e+06	643235	1.18641e+06	1.40555e+06	2.06171e+06	801979	1.02024e+06	1.97138e+06	965675	1.18478e+06	1.12997e+06	0.564015	0.402621	0.64879	-0.624177	insig
MW0049090	C40H60O4	Cycloartanyl ferulate	Aldehyde,Ketones,Esters	Esters	-	161411	16428.6	182585	102635	61329.3	64486.3	56107.3	47687.5	78300.9	75935.3	76736.7	45321.4	0.563774	0.244781	0.645449	-0.631625	insig
MW0012997	C21H43O7P	1-Stearoyl-2-hydroxy-sn-glycero-3-phosphate	GP	PA	65494-37-3	1.38615e+06	251826	1.85254e+06	5.99353e+06	3.23752e+06	2.06481e+06	2.2631e+06	2.28432e+06	1.43346e+06	1.95621e+06	129269	1.09541e+06	0.563164	0.32227	0.619609	-0.69057	insig
FDATP01730	C27H38O3	Norethisterone Enanthate	Hormones and hormone related compounds	Hormones and hormone related compounds	3836-23-5	2.46723e+06	67800.5	2.78518e+06	2.29467e+07	2.63388e+06	125156	1.4489e+06	829367	368896	2.96263e+06	58611.2	771430	0.562087	0.307231	0.207563	-2.26838	insig
MW0107733	C15H29N3O4	Leu-Leu-Ala	Amino acid and Its metabolites	Small Peptide	20274-80-0	3.03076e+06	743135	2.23664e+06	3.25155e+06	4.07321e+06	821731	3.06268e+06	2.43399e+06	5.32652e+06	1.187e+06	1.04122e+06	3.80761e+06	0.561876	0.614534	1.19086	0.252002	insig
MEDP1867	C13H23N3O4	Gly-Pro-Leu	Amino acid and Its metabolites	Small Peptide	47066-32-0	145406	666443	372218	261783	794828	1.05561e+06	314844	539139	434593	340914	88938.3	663670	0.561736	0.37972	0.722662	-0.468607	insig
MW0009514	C23H31NO2	Proadifen	Benzene and substituted derivatives	Benzene and substituted derivatives	78997-40-7	585029	590594	1.24831e+06	1.56948e+06	2.09051e+06	4.0777e+06	2.95927e+06	2.3496e+06	2.80866e+06	1.51663e+06	346853	2.04077e+06	0.560887	0.650654	1.18306	0.242519	insig
MW0054723	C12H24O11	Melibiitol	Carbohydrates and Its metabolites	Sugar alcohols	-	216522	476933	294988	368844	449946	153718	275034	936100	604326	436472	129304	282946	0.560751	0.396408	1.35862	0.442138	insig
MW0155604	C13H18O2	Plastoquinol-1	Heterocyclic compounds	Heterocyclic compounds	-	55656.3	5198.18	85011.5	107402	74323.6	5137.69	51194.1	77214.4	38730.5	68119.3	11724.4	52118.9	0.560443	0.783593	0.898935	-0.153712	insig
MW0006648	C17H23NO4	Convolamine	Benzene and substituted derivatives	Benzene and substituted derivatives	500-56-1	781519	3.93608e+06	2.5997e+06	2.18177e+06	5.21913e+06	9.06819e+06	3.09895e+06	3.84848e+06	3.31534e+06	1.59834e+06	1.11336e+06	2.35321e+06	0.559052	0.307592	0.644388	-0.633998	insig
MW0158485	C26H36N6O8	Tyr-His-Leu-Glu	Amino acid and Its metabolites	Small Peptide	-	130841	1.35685e+06	352626	460465	947041	970385	585336	930167	1.02124e+06	465778	361222	933320	0.559039	0.953904	1.01869	0.0267209	insig
MEDP1818	C6H13NO4	Bicine	Organic acid And Its derivatives	Organic acid And Its derivatives	150-25-4	216013	1.68862e+06	1.33935e+06	1.11439e+06	3.41688e+06	1.46549e+06	1.20738e+06	3.45518e+06	2.03844e+06	1.02374e+06	568720	1.72495e+06	0.558106	0.832515	1.08416	0.116574	insig
MW0052495	C23H36O3	Drostanolone propionate	Aldehyde,Ketones,Esters	Esters	521-12-0	595196	1.30017e+07	2.66796e+06	2.93967e+06	4.08595e+06	6.98738e+06	1.11791e+06	5.81678e+06	4.12291e+06	1.85537e+06	1.20699e+06	4.90745e+06	0.558075	0.376959	0.628426	-0.670185	insig
MEDP0164	C9H14N3O8P	Cytidine-5-Monophosphate	Nucleotide And Its metabolites	Nucleotide And Its metabolites	63-37-6	1.22631e+07	463077	5.80931e+07	1.39219e+07	9.98267e+06	966961	2.28643e+07	3.63189e+06	1.25883e+06	5.30199e+07	1.39594e+07	6.87311e+06	0.557661	0.934962	1.06183	0.0865536	insig
MW0013270	C28H46O	22,23-Dihydroergosterol	Hormones and hormone related compounds	Hormones and hormone related compounds	-	199264	530503	59037.3	148269	102597	246543	101888	142312	257986	86613.2	292363	101729	0.556326	0.535143	0.764173	-0.388028	insig
MW0106855	C11H21N3O4	Gln-Ile	Amino acid and Its metabolites	Small Peptide	86416-45-7	1.8619e+06	292181	1.34846e+06	1.43304e+06	1.25775e+06	410597	1.26634e+06	1.36003e+06	997415	1.36358e+06	347493	2.27838e+06	0.555505	0.649355	1.15284	0.205188	insig
MEDP1274	C24H36O2	(4Z,7Z,10Z,13Z,16Z,19Z)-Eicosahexaenoate	Aldehyde,Ketones,Esters	Esters	81926-94-5	8.23981e+06	4.09884e+07	1.42014e+06	1.19139e+07	1.24117e+07	3.33298e+07	3.72906e+07	1.2821e+07	2.52698e+07	5.97295e+06	2.0182e+07	1.19907e+07	0.55492	0.913762	1.04823	0.0679516	insig
MW0141608	C22H32O3	17-keto-7(Z),10(Z),13(Z),15(E),19(Z)-Docosapentaenoic Acid	FA	Others	-	340589	4.58229e+06	2.06282e+06	831205	1.93371e+06	2.11023e+06	1.02218e+06	1.85069e+06	2.78152e+06	666293	841758	874512	0.554396	0.381341	0.677604	-0.561486	insig
MW0016279	C24H47NO3	C-6 Ceramide	SL	Cer	124753-97-5	29921.7	365264	9154.85	27258.4	658115	1.61149e+06	55167.9	2.18818e+06	251466	46630.3	234710	157471	0.553882	0.929532	1.08604	0.119079	insig
MW0152467	C16H27N3O6	Leu-Pro-Glu	Amino acid and Its metabolites	Small Peptide	-	645206	2.54619e+06	973885	1.50989e+06	2.30352e+06	5.39104e+06	2.15245e+06	2.80481e+06	2.64678e+06	1.31935e+06	2.67169e+06	1.44701e+06	0.552294	0.944107	0.975494	-0.0357955	insig
MEDP2685	C3H4N4O2	Ammelide	Heterocyclic compounds	Heterocyclic compounds	645-93-2	99323.3	289723	101466	161344	214798	246047	132664	182547	249915	73235.7	68281.1	292534	0.550937	0.709642	0.897975	-0.155253	insig
MEDN1311	C8H16O3	2-Hydroxycaprylic acid	Organic acid And Its derivatives	Organic acid And Its derivatives	617-73-2	98981.9	66769.2	103134	35603.5	157146	230965	68572.5	634053	132726	84205.6	85717.9	75499.2	0.550664	0.523855	1.56046	0.64197	insig
MEDP0403	C9H13N3O4	Deoxycytidine	Nucleotide And Its metabolites	Nucleotide And Its metabolites	951-77-9	7.65733e+06	987238	860332	1.23985e+06	1.90742e+06	1.13595e+06	957658	4.11091e+06	1.1754e+06	1.10581e+06	5.82529e+06	2.60644e+06	0.548635	0.811136	1.14457	0.194808	insig
MEDP0326	C11H12N2O4	N'-Formylkynurenine	Amino acid and Its metabolites	Amino acid derivatives	1022-31-7	266887	160778	299719	227898	239916	284549	263651	235425	241758	284421	246779	250227	0.547973	0.753724	1.02873	0.0408654	insig
MEDN0410	C7H6O2	4-Hydroxybenzaldehyde	Benzene and substituted derivatives	Benzene and substituted derivatives	123-08-0	6.10824e+06	1.15506e+06	2.88333e+06	1.53095e+06	2.29342e+06	1.4235e+06	2.35071e+06	3.03879e+06	1.75791e+06	2.21063e+06	4.13489e+06	2.14148e+06	0.546006	0.963004	1.01558	0.0223103	insig
MW0158670	C29H48N6O7	Tyr-Val-Lys-Ala-Leu	Amino acid and Its metabolites	Small Peptide	-	404696	1.69691e+06	404557	5.05138e+06	3.80525e+06	648305	2.75768e+06	947489	1.05899e+06	3.11227e+06	2.30467e+06	639642	0.545861	0.833976	0.900896	-0.150568	insig
MEDP0119	C6H5NO3	6-Hydroxynicotinic Acid	CoEnzyme and vitamins	CoEnzyme and vitamins	5006-66-6	388028	998315	311334	313822	293568	878724	808158	599944	399974	290579	906188	562465	0.545079	0.701881	1.12046	0.16409	insig
MEDP1776	C9H18N2O3	Leu-Ala	Amino acid and Its metabolites	Small Peptide	7298-84-2	1.36798e+07	2.91205e+06	1.83022e+07	1.08181e+07	1.10875e+07	1.50464e+06	9.60727e+06	8.89626e+06	1.20313e+07	8.02836e+06	3.3588e+06	2.10034e+07	0.544856	0.832927	1.07926	0.110039	insig
MW0015483	C9H16O3	9-Oxononanoic acid	Organic acid And Its derivatives	Organic acid And Its derivatives	2553-17-5	12524.1	4017.45	43551	38629.1	39189.8	26439.2	5762	52563.3	60648	48739.3	18169	24316.9	0.544043	0.508564	1.27896	0.354976	insig
MW0016395	C34H50O7	Carbenoxolone	Benzene and substituted derivatives	Benzene and substituted derivatives	5697-56-3	4.81855e+06	1.81333e+07	2.83474e+06	1.02195e+07	1.03929e+07	4.82512e+06	6.51823e+06	4.4578e+06	1.07619e+07	4.01982e+06	1.83414e+07	1.20793e+06	0.542625	0.778296	0.884487	-0.177088	insig
MW0130859	C13H18O3	2-Hydroxyibuprofen	Heterocyclic compounds	Heterocyclic compounds	51146-55-5	1.98283e+06	26724.6	1.26154e+06	554727	1.85756e+06	35557.3	617544	883083	1.55397e+06	1.29124e+06	46748.2	774325	0.542365	0.830937	0.903472	-0.146448	insig
MEDN0107	C26H43NO4	Glycolithocholic acid	Bile acids	Bile acids	474-74-8	41206.3	116470	25608.8	44298.8	46673.5	52976.3	63896.5	42020.9	47287.8	37497.9	43877.6	34058.1	0.542077	0.500057	0.820938	-0.284655	insig
MEDP1683	C18H35N3O4	Leu-Leu-Leu	Amino acid and Its metabolites	Small Peptide	10329-75-6	2.2686e+06	767947	2.68339e+06	4.54662e+06	6.81974e+06	949884	6.2696e+06	4.72286e+06	1.72264e+06	1.00664e+06	1.40766e+06	5.38052e+06	0.542015	0.763257	1.13715	0.185428	insig
MW0108058	C18H37N5O4	Lys-Ile-Lys	Amino acid and Its metabolites	Small Peptide	-	260614	11502.7	205625	408727	207962	18998.9	329263	156028	74844.8	185224	42732.2	207611	0.54107	0.798472	0.894265	-0.161225	insig
MW0141822	C24H34N2O2	1-Oxazolo[4,5-b]pyridin-2-yl-9-octadecyn-1-one	Aldehyde,Ketones,Esters	Ketones	288862-89-5	181291	619259	836724	1.19749e+06	1.29697e+06	549931	739749	1.15308e+06	514768	420507	316427	294617	0.540171	0.364325	0.734599	-0.444971	insig
MEDP0539	C14H18O4	Ubiquinone-1	CoEnzyme and vitamins	CoEnzyme and vitamins	727-81-1	8.46082e+06	243288	1.56151e+07	3.9205e+06	2.43598e+06	88401.8	2.01533e+06	1.04635e+06	727547	3.73246e+06	222154	884701	0.539276	0.194931	0.280475	-1.83406	insig
MEDN0115	C24H40O4	Chenodeoxycholic Acid	Bile acids	Bile acids	474-25-9	1.89334e+07	7.10683e+07	4.6291e+06	2.23446e+07	2.30848e+07	5.4365e+07	7.40336e+07	2.28779e+07	4.77787e+07	1.25483e+07	4.02935e+07	2.28107e+07	0.538453	0.758768	1.1333	0.180534	insig
MW0152519	C28H46N6O9	Leu-Thr-Ser-Lys-Tyr	Amino acid and Its metabolites	Small Peptide	-	1.36782e+06	1.08635e+07	6.38623e+06	9.9751e+06	1.0528e+07	9.98444e+06	6.02451e+06	6.29665e+06	8.80087e+06	4.41106e+06	5.44484e+06	3.19945e+06	0.53751	0.184563	0.696005	-0.52283	insig
MW0159242	C16H31N3O4	Val-Val-Leu	Amino acid and Its metabolites	Small Peptide	-	3.09953e+06	918089	3.251e+06	4.61225e+06	4.67492e+06	2.00806e+06	7.6693e+06	6.73827e+06	1.80974e+06	1.08231e+06	1.66429e+06	6.80334e+06	0.536697	0.415108	1.38803	0.473043	insig
MEDP0658	C14H28O2	Ethyl-dodecanoate	Alcohol and amines	Amines	106-33-2	218192	318813	169461	271240	215772	301137	235362	266867	267416	252065	300009	244728	0.53641	0.650309	1.04806	0.0677211	insig
MW0156848	C12H24N4O6	Ser-Lys-Ser	Amino acid and Its metabolites	Small Peptide	-	8.34741e+06	6.59532e+07	6.26947e+07	4.86578e+07	1.19426e+08	9.15525e+07	4.91363e+07	6.64203e+07	6.8015e+07	2.58272e+07	2.69149e+07	1.96496e+07	0.536386	0.22343	0.645343	-0.631862	insig
MW0146241	C24H42N6O8	Asp-Pro-Lys-Ile-Ala	Amino acid and Its metabolites	Small Peptide	-	75346.9	17740.6	101075	33697.3	71689.8	273743	24070.2	23805.8	30088.2	65599	287784	34624.8	0.535592	0.759441	0.8128	-0.299028	insig
MW0054403	C16H24O10	Loganic acid	Organic acid And Its derivatives	Organic acid And Its derivatives	22255-40-9	1.78728e+06	58416.3	979865	3.05528e+06	2.13818e+06	354553	1.47822e+06	1.22257e+06	1.94164e+06	1.7869e+06	277523	833308	0.533481	0.800285	0.900473	-0.151246	insig
MEDP0663	C5H13N	3-Methyl-1-butylamine	Alcohol and amines	Amines	107-85-7	2.68308e+06	154125	183646	880493	758382	285230	158792	2.12951e+06	2.11975e+06	28404.8	21389	1.71271e+06	0.531902	0.734124	1.24785	0.319442	insig
MW0000244	C29H40N2O4	Emetine	Benzene and substituted derivatives	Benzene and substituted derivatives	483-18-1	62456	788440	205745	270668	846707	751854	126960	579072	448006	138287	97988.2	524974	0.531749	0.34233	0.654604	-0.611306	insig
MEDN2093	C5H8O3	Levulinic acid	Organic acid And Its derivatives	Organic acid And Its derivatives	591-64-0	195861	81623.8	217001	67053.2	107852	72432.5	101291	78239.3	132885	101300	88467.9	101642	0.529251	0.443473	0.813974	-0.296946	insig
MEDP1742	C12H16N2O3	Ala-Phe	Amino acid and Its metabolites	Small Peptide	3061-90-3	7.59315e+06	1.33782e+06	5.10341e+06	3.98531e+06	5.46855e+06	1.33423e+06	5.13435e+06	3.62293e+06	5.7761e+06	2.93941e+06	1.85087e+06	7.7448e+06	0.529084	0.784375	1.09048	0.124966	insig
MW0167961	C15H20O2	(3aR,5E,11aR)-6,10-dimethyl-3-methylidene-3a,4,7,8,11,11a-hexahydrocyclodeca[b]furan-2-one	Others	Others	-	984211	617254	840704	697837	1.16951e+06	739484	832993	963622	1.07908e+06	724946	381126	679219	0.529066	0.630108	0.923149	-0.115364	insig
MEDP1322	C30H52NO7P	LPC(22:5/0:0)	GP	LPC	-	3.96442e+06	8.75616e+06	218463	376312	987733	3.01995e+06	2.90817e+06	5.815e+06	2.18125e+06	523123	4.41179e+06	1.32617e+06	0.528987	0.986886	0.990905	-0.0131817	insig
MEDP0110	C8H8O3	2-Methoxybenzoic Acid	Benzene and substituted derivatives	Phenolic acids	529-75-9	524256	345000	238820	331250	560362	557994	361947	508485	367906	140320	512910	377330	0.5288	0.556525	0.887092	-0.172845	insig
MW0015475	C18H32O2	Stearolic acid	FA	FFA	506-24-1	405546	93644.4	304652	622683	495796	141570	290019	368937	161772	246152	160322	187627	0.52857	0.271638	0.685516	-0.544738	insig
MEDP0050	C9H14N4O3	L-Carnosine	Amino acid and Its metabolites	Amino acid derivatives	305-84-0	201792	147557	90521	194169	229861	165721	202060	182210	298654	84754.6	118316	430127	0.527414	0.421137	1.27826	0.354179	insig
MEDN1630	C10H10O4	Ferulic acid	Organic acid And Its derivatives	Organic acid And Its derivatives	537-98-4	25117.3	125580	41975.2	21846	28889.8	12648.4	19946.1	21027.6	25835.1	39012.7	52635.8	17489.9	0.527284	0.484487	0.687142	-0.541321	insig
MEDN1557	C6H9O9P	L-Ascorbic acid 2-phosphate	Organic acid And Its derivatives	Phosphoric acids	23313-12-4	44898.6	139624	92281.9	105358	157626	162513	89778	90843.1	172243	75668	64787.3	96087.5	0.525066	0.453428	0.83925	-0.252827	insig
MEDP0555	C19H30O2	Androsterone	Hormones and hormone related compounds	Hormones and hormone related compounds	53-41-8	2.30342e+06	389534	1.68336e+06	1.18026e+06	1.69494e+06	58189.6	1.06556e+06	1.13348e+06	1.91939e+06	2.1517e+06	249635	1.08409e+06	0.524585	0.914908	1.04024	0.0569206	insig
MEDP1758	C19H30O2	Etiocholanolone	Hormones and hormone related compounds	Hormones and hormone related compounds	53-42-9	2.30342e+06	389534	1.68336e+06	1.18026e+06	1.69494e+06	58189.6	1.06556e+06	1.13348e+06	1.91939e+06	2.1517e+06	249635	1.08409e+06	0.524585	0.914908	1.04024	0.0569206	insig
MW0138787	C26H32O5	Licoricidin	Heterocyclic compounds	Heterocyclic compounds	30508-27-1	1.08939e+07	152545	9.80499e+06	9.94465e+06	6.05463e+06	54780.2	6.76343e+06	737820	181062	9.33259e+06	53656.5	1.04722e+06	0.524516	0.257831	0.490869	-1.02659	insig
MW0010659	C25H22O10	Silibinin	Others	Others	22888-70-6	276097	67962	157894	2.42573e+06	494421	996472	458152	59752.2	185967	124520	1.65603e+06	241967	0.523681	0.537572	0.617028	-0.696592	insig
MEDP1883	C21H33N3O4	Phe-Leu-Leu	Amino acid and Its metabolites	Small Peptide	-	1.41076e+06	306332	966481	1.59503e+06	1.44857e+06	622674	1.39633e+06	1.24081e+06	1.18361e+06	789988	461164	1.918e+06	0.523118	0.724161	1.1008	0.138554	insig
MW0054971	C21H36O4	MG(0:0/18:3(6Z,9Z,12Z)/0:0)	GL	MG	-	8.68217e+06	150464	1.5345e+07	3.08866e+07	8.24801e+06	454186	4.48341e+06	3.91937e+06	1.20347e+06	1.19388e+07	97080.3	1.734e+06	0.521121	0.223259	0.36659	-1.44776	insig
MEDN0506	C8H16NO9P	N-Acetylglucosamine 1-Phosphate	Carbohydrates and Its metabolites	Phosphate sugars	6866-69-9	1.48076e+07	701765	2.67126e+06	1.58374e+07	1.44562e+06	1.19737e+06	896013	2.39795e+06	4.18523e+06	1.19373e+06	1.34283e+06	9.8025e+06	0.521108	0.414588	0.540581	-0.887418	insig
MEDN0479	C6H12O2	4-Methylvaleric Acid	Organic acid And Its derivatives	Organic acid And Its derivatives	646-07-1	28502.8	41501.6	66137.1	5694.69	164087	293627	65024.6	271688	40846.5	29427.7	137191	33777.3	0.52103	0.952721	0.963981	-0.0529241	insig
MW0123679	C14H14N6O3	Dihydropteroate	Organic acid And Its derivatives	Organic acid And Its derivatives	-	873389	447929	451132	472544	417986	575267	889614	547995	670960	394995	644066	452910	0.520969	0.56287	1.11188	0.153	insig
MW0137932	C24H32O6	Deoxyschizandrin	Heterocyclic compounds	Heterocyclic compounds	61281-38-7	3.23317e+07	821133	6.56507e+07	1.60684e+07	8.07725e+06	378112	1.54608e+07	2.83354e+06	1.24412e+06	2.73713e+07	464155	3.48443e+06	0.520586	0.315351	0.412385	-1.27793	insig
MW0146350	C19H18N2O8	Asp-HoPhe-OH	Amino acid and Its metabolites	Small Peptide	-	936722	6.26395e+06	5.05329e+06	2.6825e+06	1.53418e+07	9.04423e+06	4.53085e+06	6.44178e+06	3.71372e+06	2.2618e+06	1.51175e+06	4.1945e+06	0.518458	0.255982	0.576118	-0.795563	insig
MW0154042	C40H56N6O8	Myxochromide S3	Alcohol and amines	Amines	-	76211.4	285732	23761.9	119718	98705.3	120618	112560	141679	175651	55884.7	95822	189631	0.51709	0.856813	1.06413	0.0896805	insig
MW0011282	C13H22O4	(3S,5R,6R,7E)-3,5,6-Trihydroxy-7-megastigmen-9-one	Aldehyde,Ketones,Esters	Ketones	-	15373.2	877035	24364.4	43603	45008.3	19719.2	33841.1	48889.4	46638.4	37697.3	44745.4	18282.9	0.516397	0.391663	0.22446	-2.15547	insig
MW0055023	C21H38O4	MG(18:2(9Z,12Z)/0:0/0:0)	GL	MG	-	1.11153e+06	112169	1.78722e+06	896278	541159	173569	750365	330289	1.11482e+06	1.01953e+06	19778.7	348310	0.515162	0.594217	0.775239	-0.367288	insig
MEDN1967	C6H7NO3S	P-sulfanilic acid	Amino acid and Its metabolites	Amino acid derivatives	121-57-3	47316.8	798751	337756	398037	956770	1.3698e+06	300312	467044	597187	189951	175343	326808	0.513314	0.186454	0.526207	-0.926299	insig
MW0146160	C19H27N3O7	Asp-Ile-Tyr	Amino acid and Its metabolites	Small Peptide	-	470596	133800	754421	630136	714827	257380	787629	676043	296762	470357	279119	524864	0.513178	0.928129	1.02486	0.0354264	insig
MW0049037	C21H34O5	Cortolone	Aldehyde,Ketones,Esters	Ketones	516-42-7	3.93356e+06	1.20156e+07	8.81843e+06	1.00175e+07	7.86537e+06	9.18266e+06	8.71996e+06	9.11583e+06	5.47283e+06	3.86845e+06	1.23696e+07	6.53168e+06	0.512898	0.575338	0.888975	-0.169785	insig
MEDN1419	C20H30O3	12-OxoETE	FA	Oxidized lipids	108437-64-5	1.21775e+06	245795	882989	456792	1.1324e+06	180354	1.0666e+06	799933	2.53587e+06	980565	86171.8	783498	0.51152	0.374867	1.51908	0.603195	insig
MEDP0792	C4H9N	Pyrrolidine	Heterocyclic compounds	Heterocyclic compounds	123-75-1	4.13163e+07	3.17195e+07	1.1591e+07	2.30074e+07	2.29207e+07	1.85419e+07	2.40568e+07	2.75194e+07	2.74208e+07	2.01817e+07	3.21227e+07	2.54639e+07	0.511064	0.787533	1.05143	0.0723556	insig
MEDN0071	C3H7NO5S2	S-Sulfo-L-Cysteine	Amino acid and Its metabolites	Amino acid derivatives	1637-71-4	663855	574554	753358	878404	973698	398848	1.14623e+06	429629	1.94629e+06	1.14101e+06	337537	692931	0.510899	0.383628	1.34198	0.424359	insig
MEDP1911	C20H21N3O3	Phe-Trp	Amino acid and Its metabolites	Small Peptide	24587-41-5	820235	146099	209955	359500	454123	170880	513119	232717	427029	300944	281046	377755	0.509766	0.967889	0.986958	-0.01894	insig
MEDN1513	C9H12N2O6	5-Hydroxy-2'-deoxyuridine	Nucleotide And Its metabolites	Nucleotide And Its metabolites	5168-36-5	545903	2.19221e+06	329847	1.09169e+06	811659	3.72913e+06	549266	2.15902e+06	815217	177600	1.1819e+06	1.41487e+06	0.508686	0.524038	0.723856	-0.466225	insig
MEDP2346	C4H9NO2	N-Ethylglycine	Amino acid and Its metabolites	Amino acid derivatives	627-01-0	4.08003e+07	2.28585e+07	1.61196e+07	1.69469e+07	17582068	1.9633e+07	1.58e+07	1.9474e+07	2.22438e+07	1.61655e+07	2.19124e+07	2.55612e+07	0.508596	0.62247	0.904559	-0.144714	insig
MEDP0868	C4H9NO2	N-Methylalanine	Amino acid and Its metabolites	Amino acid derivatives	3913-67-5	4.08003e+07	2.28585e+07	1.61196e+07	1.69469e+07	17582068	1.9633e+07	1.58e+07	1.9474e+07	2.22438e+07	1.61655e+07	2.19124e+07	2.55612e+07	0.508596	0.62247	0.904559	-0.144714	insig
MW0116054	C19H26N6O	(R)-Roscovitine	Heterocyclic compounds	Heterocyclic compounds	186692-46-6	132381	109860	125942	145254	249301	139933	163243	204162	181645	65684.3	83084.6	121341	0.508467	0.658029	0.907484	-0.140056	insig
MW0141815	C26H52NO8P	1-O-Palmitoyl-2-O-acetyl-sn-glycero-3-phosphorylcholine	GP	PC	-	730850	2.93989e+06	121377	919890	914716	2.54195e+06	3.00395e+06	2.45003e+06	6.06787e+06	9	1.29861e+06	2.00441e+06	0.508141	0.278151	1.81484	0.859846	insig
MEDN0053	C6H9NO5	N-Acetylaspartate	Amino acid and Its metabolites	Amino acid derivatives	997-55-7	319710	186234	588138	674227	327682	92154.4	712735	488602	157567	566122	491326	140836	0.508106	0.649974	1.16866	0.22485	insig
MEDP2395	C10H20N2O4	Ile-Thr	Amino acid and Its metabolites	Small Peptide	59652-61-8	2.69857e+07	5.97116e+06	2.48566e+07	2.24471e+07	1.66239e+07	8.21734e+06	1.40729e+07	1.61871e+07	2.12671e+07	1.52828e+07	9.00931e+06	5.45459e+07	0.507971	0.598061	1.24037	0.310769	insig
MEDP2396	C10H20N2O4	Leu-Thr	Amino acid and Its metabolites	Small Peptide	-	2.69857e+07	5.97116e+06	2.48566e+07	2.24471e+07	1.66239e+07	8.21734e+06	1.40729e+07	1.61871e+07	2.12671e+07	1.52828e+07	9.00931e+06	5.45459e+07	0.507971	0.598061	1.24037	0.310769	insig
MEDP0297	C5H11NO2	5-Aminovaleric Acid	Amino acid and Its metabolites	Amino acid derivatives	660-88-8	5.83883e+07	7.34103e+06	5.65929e+06	1.28216e+07	1.00674e+07	4.52134e+06	9.7802e+06	1.00489e+07	1.29226e+08	8.39834e+06	1.67491e+07	7.87015e+06	0.507675	0.540839	1.84286	0.88195	insig
MW0144666	C19H35N5O7	Ala-Lys-Leu-Asp	Amino acid and Its metabolites	Small Peptide	-	915908	63729.5	3.54672e+06	898623	466541	41008.2	2.18234e+06	186437	151937	3.25106e+06	734669	255898	0.506363	0.857724	1.13987	0.188875	insig
MW0157659	C15H24N6O6	Thr-His-Gln	Amino acid and Its metabolites	Small Peptide	-	332734	1.72768e+06	1.10527e+06	937672	2.18346e+06	2.69609e+06	1.27249e+06	2.10801e+06	1.23834e+06	662819	271333	1.23292e+06	0.505298	0.423974	0.755425	-0.404639	insig
MW0054441	C24H36O5	Lucidone C	Aldehyde,Ketones,Esters	Ketones	-	7.97434e+06	3.69651e+07	8.14077e+06	1.76333e+07	1.39047e+07	2.22913e+07	1.51834e+07	1.73318e+07	2.12485e+07	9.12447e+06	1.23491e+07	1.00693e+07	0.505139	0.480975	0.797933	-0.325661	insig
MW0150149	C18H33N5O9	Glu-Ser-Thr-Lys	Amino acid and Its metabolites	Small Peptide	-	269507	868784	911002	586307	1.20108e+06	1.16394e+06	1.13984e+06	939244	751204	584264	130172	692965	0.503411	0.542812	0.847432	-0.238831	insig
MW0015145	C20H32O3	7-[3-(Undeca-2,5-dien-1-yl)oxiran-2-yl]hept-5-enoic acid	FA	Others	81246-85-7	1.70693e+07	2.66687e+07	5.41252e+06	2.92479e+07	5.73158e+06	2.31028e+06	1.63996e+07	8.03988e+06	8.10729e+07	2.0429e+07	1.70014e+06	4.23418e+07	0.503367	0.318228	1.96648	0.975618	insig
MW0109942	C14H18N2O8	Threoninyl-Threonine	Amino acid and Its metabolites	Small Peptide	96337-78-9	9.95944e+06	492943	4.60701e+06	8.98206e+06	2.41303e+06	852979	1.88457e+06	1.65611e+06	2.40035e+06	7.34163e+06	8.28736e+06	5.30745e+06	0.502259	0.972865	0.984253	-0.0228988	insig
MEDN0138	C7H11N3O2	1-Methylhistidine	Amino acid and Its metabolites	Amino acid derivatives	332-80-9	4.64194e+06	371377	5.40167e+06	2.00934e+06	2.96825e+06	449155	1.10819e+06	1.27093e+06	3.02389e+06	1.94754e+06	306278	1.613e+06	0.500439	0.280843	0.585152	-0.773117	insig
MEDN1760	C12H22O11	D-cellobiose	Carbohydrates and Its metabolites	Sugars	528-50-7	133672	263044	286438	350270	207542	317015	208961	214107	256317	244545	432610	333872	0.500174	0.653415	1.085	0.117698	insig
MEDN0300	C9H16O4	Azelaic Acid	Organic acid And Its derivatives	Organic acid And Its derivatives	123-99-9	336592	465807	769926	457737	528999	218324	612731	389582	341425	604463	669065	331822	0.499974	0.777854	1.06182	0.0865414	insig
MW0144618	C15H29N3O4	Ala-Ile-Leu	Amino acid and Its metabolites	Small Peptide	-	2.70834e+06	717273	2.71208e+06	4.91073e+06	4.40733e+06	962074	6.37768e+06	2.87438e+06	1.6883e+06	1.35338e+06	1.32313e+06	4.96051e+06	0.499859	0.753472	1.13154	0.178285	insig
MW0144637	C15H29N3O4	Ala-Leu-Leu	Amino acid and Its metabolites	Small Peptide	-	2.70834e+06	717273	2.71208e+06	4.91073e+06	4.40733e+06	962074	6.37768e+06	2.87438e+06	1.6883e+06	1.35338e+06	1.32313e+06	4.96051e+06	0.499859	0.753472	1.13154	0.178285	insig
MW0153581	C17H29N5O4S1	Met-Ile-His	Amino acid and Its metabolites	Small Peptide	-	374877	525152	533349	936069	727793	2.08252e+06	776083	850535	1.34303e+06	470383	1.04276e+06	777733	0.499772	0.963377	1.01559	0.0223209	insig
MW0053773	C31H52O12	Goshonoside F6	Benzene and substituted derivatives	Benzene and substituted derivatives	-	59411.1	563645	42983.9	244437	842291	268297	425055	410641	277849	55874.6	6751.68	250868	0.499744	0.516218	0.706083	-0.50209	insig
MW0155855	C16H27N3O6	Pro-Glu-Ile	Amino acid and Its metabolites	Small Peptide	-	8.12579e+06	7.49403e+06	9.38211e+06	2.008e+07	1.08578e+07	2.48828e+07	1.46269e+07	7.11537e+06	2.64167e+07	9.02994e+06	1.57898e+07	1.93279e+07	0.499672	0.651974	1.14209	0.191676	insig
MW0122779	C17H25N3O2S	Almotriptan	Heterocyclic compounds	Heterocyclic compounds	154323-57-6	382999	197914	422249	716585	536907	386639	465267	659086	307544	122271	235811	561776	0.499479	0.667357	0.889707	-0.168598	insig
MW0151014	C18H32N6O4	His-Lys-Leu	Amino acid and Its metabolites	Small Peptide	-	907133	3.43365e+06	629771	6.38391e+06	2.09749e+06	2.38356e+06	684344	4.03754e+06	9.04141e+06	2.51895e+06	119433	1.32839e+06	0.499301	0.847708	1.11964	0.163034	insig
MW0145258	C16H32N10O5	Arg-Arg-Asn	Amino acid and Its metabolites	Small Peptide	-	8.1394e+06	220027	1.84327e+07	1.47528e+07	1.00244e+07	118841	1.26582e+07	1.07713e+06	414070	9.6401e+06	90364	1.51895e+06	0.49856	0.275498	0.491387	-1.02507	insig
MW0131406	C31H32O8	3-(6-{2,4-dihydroxy-3-[(1E)-3-methylbut-1-en-1-yl]benzoyl}-5-(2,4-dihydroxyphenyl)-3-methylcyclohex-2-en-1-yl)benzene-1,2,4-triol	Benzene and substituted derivatives	Benzene and substituted derivatives	-	457351	1.41295e+06	102711	444487	818604	1.02817e+06	817210	315396	584916	791803	1.28634e+06	540615	0.498142	0.960425	1.01689	0.0241579	insig
MW0144699	C22H35N5O6	Ala-Phe-Thr-Lys	Amino acid and Its metabolites	Small Peptide	-	157378	273430	101883	1.6636e+06	126854	504753	234952	143739	430335	178482	442813	127936	0.49721	0.436978	0.55103	-0.859796	insig
MW0149018	C18H24O5S	Estradiol-17beta 3-sulfate	Organic acid And Its derivatives	Sulfonic acids	-	21493.7	23529.7	30821.3	30991.5	43936.9	6710.26	30761.6	22706.6	25408.7	20441.2	26950.2	27453.3	0.494879	0.909369	0.976114	-0.0348784	insig
MEDN1595	C10H13N4O9P	Xanthosine-5'-monophosphate	Nucleotide And Its metabolites	Nucleotide And Its metabolites	25899-70-1	97093.2	173353	177069	192062	194422	577015	230984	659515	473807	151697	109024	167345	0.49442	0.588726	1.27027	0.345137	insig
MEDP2001	C5H7NO3	Pyroglutamic acid	Amino acid and Its metabolites	Amino acids	98-79-3	9.0786e+07	1.34367e+08	8.28242e+07	9.76108e+07	146422259	1.09693e+08	1.09397e+08	1.2194e+08	1.51586e+08	1.01419e+08	1.12033e+08	9.30685e+07	0.494122	0.734833	1.04192	0.0592486	insig
MEDP0066	C11H13NO4	N-Acetyl-L-Tyrosine	Amino acid and Its metabolites	Amino acid derivatives	537-55-3	655622	213270	345437	144289	154082	85995.3	224252	182557	179157	191312	257439	123923	0.493343	0.438136	0.724741	-0.464463	insig
MEDP1719	C11H15N5O5	2'-O-Methylguanosine	Nucleotide And Its metabolites	Nucleotide And Its metabolites	2140-71-8	549612	95267.4	472223	353937	248596	157009	210776	279296	222013	407659	647665	250876	0.493202	0.81825	1.07548	0.104975	insig
MEDP2005	C7H13NO2	1-Aminocyclohexanecarboxylic acid	Organic acid And Its derivatives	Organic acid And Its derivatives	2756-85-6	313675	447706	879287	501339	1.32325e+06	1.52748e+06	760527	2.72339e+06	512211	871812	275736	1.10798e+06	0.492437	0.623285	1.25215	0.324409	insig
MW0148091	C14H27N3O4S1	Cys-Val-Leu	Amino acid and Its metabolites	Small Peptide	-	1.6761e+06	4.51263e+06	1.7541e+06	4.91994e+06	2.52757e+06	6.47615e+06	3.56593e+06	1.10678e+06	9.78132e+06	2.51689e+06	355315	7.57729e+06	0.491655	0.777053	1.13889	0.187628	insig
MW0158596	C19H27N3O5	Tyr-Pro-Val	Amino acid and Its metabolites	Small Peptide	-	575559	4.16096e+06	1.83412e+06	1.58296e+06	4.87593e+06	5.23333e+06	2.5639e+06	2.75152e+06	1.96305e+06	1.45729e+06	627788	2.85827e+06	0.491615	0.28725	0.669216	-0.579455	insig
MW0156072	C8H14N2O4	Proclavaminic acid	Organic acid And Its derivatives	Organic acid And Its derivatives	112240-59-2	1.50158e+07	585956	1.06341e+07	3.01849e+07	2.87907e+07	418705	2.22822e+07	3.91203e+06	327972	1.66482e+07	256485	3.92464e+06	0.490521	0.355607	0.552977	-0.854707	insig
MEDL02628	C18H18O6	Melilotocarpan C	Others	Others	83013-82-5	814566	461004	931329	1.32935e+06	553902	159175	845616	378504	383948	720928	2.14572e+06	675933	0.489308	0.646839	1.21211	0.27752	insig
FDATN01441	C4H8N3Na2O5P	Creatine phosphate disodium salt	Others	FDA	922-32-7	197049	200875	211779	485031	483720	273397	1.02063e+06	230538	1.12714e+06	116564	138671	423451	0.486551	0.338293	1.65078	0.723144	insig
MEDP0176	C10H14N2O5	Thymidine	Nucleotide And Its metabolites	Nucleotide And Its metabolites	50-89-5	6.03107e+06	2.2741e+06	965850	3.5747e+06	2.66145e+06	3.5236e+06	1.81566e+06	6.24326e+06	3.24138e+06	947941	7.41696e+06	6.34587e+06	0.486452	0.395179	1.36679	0.450792	insig
MEDP1678	C15H29N3O5	Thr-Val-Leu	Amino acid and Its metabolites	Small Peptide	-	3.17614e+07	2.31439e+06	6.2881e+06	7.62775e+06	8.71512e+06	2.37518e+06	1.48901e+07	9.4035e+06	5.50994e+06	5.58902e+06	5.10396e+06	1.09171e+07	0.486426	0.79819	0.870208	-0.200567	insig
MEDP1740	C3H5NO	Acrylamide	Alcohol and amines	Amines	79-06-1	1.63919e+07	7.0556e+06	2.89375e+06	5.41417e+06	4.81954e+06	3.45262e+06	8.21807e+06	6.29449e+06	5.00333e+06	5.27842e+06	9.75931e+06	5.82262e+06	0.485126	0.979492	1.00871	0.0125115	insig
MW0144601	C19H33N7O6	Ala-His-Thr-Lys	Amino acid and Its metabolites	Small Peptide	-	622641	821895	235154	254516	1.08235e+06	75098	747248	558549	670877	232365	204140	664418	0.484771	0.99029	0.995453	-0.00657439	insig
MW0167875	C22H30O3	(4Z,8E,10Z,13Z,16Z,19Z)-7-oxodocosa-4,8,10,13,16,19-hexaenoic acid	Others	Others	-	3.68064e+06	1.08942e+06	5.00343e+06	7.25125e+06	5.5897e+06	1.41418e+06	2.68848e+06	4.41308e+06	3.83762e+06	4.2471e+06	550542	2.41101e+06	0.484717	0.42035	0.755258	-0.404958	insig
MEDN0434	C9H12N2O6	Β-Pseudouridine	Nucleotide And Its metabolites	Nucleotide And Its metabolites	1445-07-4	1.01018e+06	2.69114e+06	443068	1.22908e+06	1.32679e+06	4.18403e+06	1.15202e+06	3.57163e+06	1.12213e+06	833694	3.25357e+06	2.10755e+06	0.484417	0.799744	1.10624	0.145661	insig
MW0150941	C25H45N9O6	His-Gly-Lys-Lys-Val	Amino acid and Its metabolites	Small Peptide	-	1.43085e+06	114855	911754	1.04757e+06	549657	44183.8	593853	256865	468855	459298	1.82963e+06	372661	0.483471	0.953199	0.971283	-0.0420358	insig
MW0016222	C21H32O2	Bolasterone	Hormones and hormone related compounds	Hormones and hormone related compounds	1605-89-6	1.08753e+06	1.49482e+06	685143	2.37588e+06	1.69045e+06	1.20864e+06	826015	1.31969e+06	1.97902e+06	762670	912301	1.80924e+06	0.482973	0.637072	0.890719	-0.166958	insig
MEDP0159	C5H5N5	Adenine	Nucleotide And Its metabolites	Nucleotide And Its metabolites	73-24-5	193046	2.86431e+06	3.36534e+06	465768	1.1729e+06	950446	2.00639e+06	700882	842650	439938	943782	390894	0.482613	0.328591	0.59084	-0.759162	insig
MEDN1614	C5H11O8P	D-Arabinose 5-phosphate	Carbohydrates and Its metabolites	Phosphate sugars	13137-52-5	3.01218e+06	103222	7.32874e+06	8.02498e+06	854978	158586	555510	359338	187591	5.20088e+06	1.59445e+06	442543	0.48206	0.298955	0.428088	-1.22402	insig
MW0145320	C15H28N8O6	Arg-Gln-Asn	Amino acid and Its metabolites	Small Peptide	-	2.97452e+07	793561	6.35982e+07	1.71775e+07	8.60001e+06	319988	1.52635e+07	2.79066e+06	1.26784e+06	2.66829e+07	475927	3.58123e+06	0.480926	0.311715	0.416371	-1.26406	insig
MW0013208	C22H36O5	20a,20b-Dihomo-9-oxo-11R,15S-dihydroxy-5Z,13E-prostadienoic acid	Hormones and hormone related compounds	Hormones and hormone related compounds	37492-24-3	1.71334e+07	5.97771e+06	7.65105e+06	1.11014e+07	7.13902e+06	6.2206e+06	1.15975e+07	7.09705e+06	3.97386e+06	1.1755e+07	7.88416e+06	6.31546e+06	0.480868	0.621961	0.88048	-0.183638	insig
MW0169534	C13H13N5	N-benzyl-1-methyl-1H-pyrazolo[3,4-d]pyrimidin-4-amine	Benzene and substituted derivatives	Benzene and substituted derivatives	-	26953.1	118343	66604.4	30830.6	123439	71976.4	68359.9	95557.2	77614.5	45639.5	18389.3	40315.6	0.477934	0.470493	0.789407	-0.341158	insig
MW0063827	C21H34O3	Tetrahydrodeoxycorticosterone	Hormones and hormone related compounds	Hormones and hormone related compounds	567-02-2	4.61844e+06	4.18788e+06	4.27219e+06	1.41584e+07	8.81358e+06	8.31967e+06	1.02425e+07	1.10846e+07	6.36867e+06	9.57439e+06	3.11088e+06	7.47273e+06	0.477929	0.778139	1.07851	0.109043	insig
MW0012750	C22H38O5	1a,1b-Dihomoprostaglandin E1	Hormones and hormone related compounds	Hormones and hormone related compounds	-	929789	4.19783e+06	768680	1.4822e+06	1.66938e+06	3.8665e+06	1.06964e+06	1.01861e+07	3.03466e+06	1.39281e+06	638733	4.83407e+06	0.47792	0.419366	1.63818	0.71209	insig
MW0150401	C28H40N6O8	Gly-Leu-Asp-Val-Trp	Amino acid and Its metabolites	Small Peptide	-	64810.7	308567	7135.34	18860.9	89892.6	137367	17124.3	53161.4	256907	39634.7	1.07171e+06	46170.3	0.477799	0.445724	2.36934	1.24448	insig
MW0162175	C16H20N2O2	(2S)-2-azaniumyl-3-[4-(3-methylbut-2-enyl)-1H-indol-3-yl]propanoate	Others	Others	-	2.19568e+06	6.60494e+06	3.51299e+06	4.16543e+06	6.85884e+06	6.3e+06	4.56935e+06	5.34303e+06	7.84628e+06	3.11841e+06	6.17603e+06	4.32841e+06	0.477217	0.784072	1.05883	0.0824729	insig
MW0157765	C28H44N6O9	Thr-Phe-Leu-Thr-Gln	Amino acid and Its metabolites	Small Peptide	-	661338	1.92158e+06	225117	1.68497e+06	1.96896e+06	492587	1.47274e+06	802074	2.40998e+06	783811	547789	1.24626e+06	0.476702	0.905896	1.0443	0.0625382	insig
MEDN0299	C6H10O4	Adipic Acid	Organic acid And Its derivatives	Organic acid And Its derivatives	124-04-9	1.98333e+06	493223	1.888e+06	952124	1.33019e+06	303227	1.22895e+06	920792	1.88902e+06	1.11933e+06	1.09541e+06	713696	0.476026	0.993309	1.00246	0.00354683	insig
MEDP1242	C11H14O2	4-tert-butylbenzoic acid	Benzene and substituted derivatives	Phenolic acids	98-73-7	648928	664216	591335	507473	570584	507120	622964	699759	511050	452854	561194	533949	0.475914	0.698023	0.969084	-0.0453069	insig
MEDN1613	C30H39NO5	Cytochalasin H	Hormones and hormone related compounds	Hormones and hormone related compounds	53760-19-3	811498	1.39892e+06	668390	889344	887912	1.12857e+06	719904	970221	792532	1.03783e+06	1.54342e+06	1.20728e+06	0.475107	0.627887	1.08411	0.116511	insig
MW0146816	C33H44N4O7	Boc-Phe(NMe)-Pro-Phe(NMe)-Gly-OMe	Others	Others	-	180104	1.05988e+07	43167.3	1.19957e+06	2.13711e+06	1.13206e+07	1.16323e+06	2.96629e+06	1.10058e+07	282021	5.74875e+06	913234	0.474869	0.839528	0.866558	-0.206631	insig
MEDP1956	C5H5N5	2-Aminopurine	Nucleotide And Its metabolites	Nucleotide And Its metabolites	452-06-2	663919	1.10562e+06	2.17818e+06	1.34111e+06	1.23763e+06	855025	752492	1.42934e+06	384055	662292	3.42729e+06	696980	0.474737	0.992694	0.996067	-0.00568538	insig
MW0165396	C20H30O3	(1R,5R,9S)-13-hydroxy-5,9-dimethyl-14-methylidenetetracyclo[11.2.1.01,10.04,9]hexadecane-5-carboxylic acid	Organic acid And Its derivatives	Organic acid And Its derivatives	-	767550	1.24154e+07	995258	1.83398e+06	2.68557e+06	4.95868e+06	1.36528e+06	2.58181e+06	2.16605e+06	1.43197e+06	3.5185e+06	1.70041e+06	0.474554	0.365113	0.539559	-0.890148	insig
MW0145409	C22H43N11O6	Arg-Leu-Asn-Arg	Amino acid and Its metabolites	Small Peptide	-	2.34985e+06	6.39612e+06	547154	3.05526e+06	2.01405e+06	5.58651e+06	4.40477e+06	2.16744e+06	2.44679e+06	1.03679e+06	1.23167e+07	4.32101e+06	0.473527	0.570007	1.33809	0.420175	insig
MW0054667	C10H17NO6	Malonyl-L-carnitine	Nucleotide And Its metabolites	Nucleotide and Its metabolites	910825-21-7	270203	3.29241e+06	2.64488e+06	3.88525e+06	3.66947e+06	2.25052e+06	2.53226e+06	3.25913e+06	2.88252e+06	1.57014e+06	2.64537e+06	1.95186e+06	0.472758	0.753247	0.926843	-0.109603	insig
MW0149516	C20H22N2O2	Gelsemine	Alkaloids	Alkaloids	509-15-9	1.1382e+06	644913	992328	706000	874225	2.42088e+06	1.13394e+06	835573	2.07507e+06	840268	119725	1.6926e+06	0.47074	0.973618	0.988287	-0.0169977	insig
MEDN1224	C12H24O17P2	Bis(1-inositol)-3,1'-phosphate 1-phosphate	Alcohol and amines	Alcohols	-	5.07544e+06	1.9336e+07	2.096e+06	4.37666e+06	8.36867e+06	2.32272e+07	5.04226e+06	1.32986e+07	5.04642e+07	2.33839e+06	5.7261e+06	2.83542e+07	0.469985	0.42525	1.68412	0.751996	insig
MEDP0685	C4H9NO2S	Methylcysteine	Amino acid and Its metabolites	Amino acids	1187-84-4	265012	3.40727e+06	3.85585e+06	471152	1.31283e+06	1.09665e+06	2.31217e+06	863932	1.11574e+06	511715	1.14093e+06	397261	0.469013	0.354289	0.60927	-0.714846	insig
MEDP2292	C19H20O6	Diosbulbin B	Benzene and substituted derivatives	Benzene and substituted derivatives	20086-06-0	323657	7.25707e+06	285739	785580	1.78459e+06	5.18051e+06	717536	2.25625e+06	3.30391e+06	749786	225198	883919	0.468021	0.367144	0.521004	-0.940633	insig
MW0155981	C19H25N3O4	Pro-Pro-Phe	Amino acid and Its metabolites	Small Peptide	-	366589	3.21027e+06	1.34793e+06	1.03428e+06	3.72507e+06	5.00554e+06	1.74576e+06	3.10524e+06	1.18693e+06	888664	510151	1.85292e+06	0.467575	0.3103	0.632395	-0.661103	insig
MEDN1543	C4H8N2O3	Gly-Gly	Amino acid and Its metabolites	Small Peptide	556-50-3	58490	19810.8	25383	56622.2	54277.8	30416.9	26854.9	32013.8	42197.7	46277.3	33717.9	90577.5	0.466778	0.717277	1.10873	0.148906	insig
MEDN1548	C8H16N2O3	Val-Ala	Amino acid and Its metabolites	Small Peptide	27493-61-4	383497	540120	792060	468388	542286	231709	690089	419011	336482	601964	733533	372034	0.466734	0.760103	1.06594	0.0921258	insig
MW0151227	C20H22N2O6	HoPhe-Val-OH	Aldehyde,Ketones,Esters	Esters	-	57583.3	404114	192867	305703	344332	569785	270607	365327	514163	192513	237050	286630	0.465733	0.987817	0.995682	-0.00624274	insig
MEDN1423	C20H34O3	15(S)-HETrE	FA	Oxidized lipids	92693-02-2	719476	269894	672894	1.03498e+06	609879	526383	670863	575767	742556	532026	186797	688384	0.465297	0.591465	0.885975	-0.174663	insig
MEDN0779	C20H34O3	5-HETrE	FA	Oxidized lipids	195061-94-0	719476	269894	672894	1.03498e+06	609879	526383	670863	575767	742556	532026	186797	688384	0.465297	0.591465	0.885975	-0.174663	insig
MEDN1422	C20H34O3	8(S)-HETrE	FA	Oxidized lipids	889573-69-7	719476	269894	672894	1.03498e+06	609879	526383	670863	575767	742556	532026	186797	688384	0.465297	0.591465	0.885975	-0.174663	insig
MEDP1056	C4H7NO4	Iminodiacetic acid	Organic acid And Its derivatives	Organic acid And Its derivatives	142-73-4	3.3819e+07	4.99887e+07	3.48523e+07	3.70402e+07	4.97758e+07	2.26667e+07	6.33197e+07	4.25246e+07	1.26842e+07	5.60995e+07	7.73566e+07	2.9561e+07	0.465155	0.425778	1.23408	0.303431	insig
MEDP0014	C4H7NO4	L-Aspartic Acid	Amino acid and Its metabolites	Amino acids	56-84-8	3.3819e+07	4.99887e+07	3.48523e+07	3.70402e+07	4.97758e+07	2.26667e+07	6.33197e+07	4.25246e+07	1.26842e+07	5.60995e+07	7.73566e+07	2.9561e+07	0.465155	0.425778	1.23408	0.303431	insig
MW0159038	C16H29N3O6	Val-Ile-Glu	Amino acid and Its metabolites	Small Peptide	-	1.21304e+07	3.30599e+06	9.11881e+06	3.54864e+07	9316399	5.05763e+06	1.22372e+07	1.69005e+07	1.15214e+07	7.17402e+06	4.16466e+06	2.76206e+07	0.464985	0.885796	1.06992	0.0974978	insig
MW0141713	C23H34O4	1-Dehydro-12-gingerdione	Aldehyde,Ketones,Esters	Ketones	-	2.29195e+06	5.41256e+06	1.66583e+06	7.60659e+06	3.68383e+06	6.98435e+06	5.13493e+06	3.9058e+06	2.29394e+06	4.58268e+06	3.54403e+06	2.23438e+06	0.464768	0.401691	0.784795	-0.349612	insig
MW0000015	C22H27NO4	(+)-Corydaline	Alkaloids	Alkaloids	518-69-4	2.00499e+06	7.3448e+06	1.67653e+06	3.05544e+06	5.1255e+06	1.93768e+07	4.72046e+06	7.03422e+06	7.99036e+06	3.29935e+06	5.70586e+06	4.41228e+06	0.464348	0.760294	0.859488	-0.21845	insig
MEDP2226	C18H32O2	Bovinic acid	FA	FFA	2540-56-9	162627	1.90756e+06	298224	386432	266315	535945	341247	758117	4.6358e+06	596253	78312.9	994960	0.462258	0.41879	2.08166	1.05774	insig
MEDN0602	C10H14N5O7P	Deoxyguanosine 5'-monophosphate(dGMP)	Nucleotide And Its metabolites	Nucleotide And Its metabolites	902-04-5	1.22369e+06	108354	1.66981e+07	3.84407e+06	2.49296e+06	216919	6.12294e+06	773908	303408	1.00689e+07	1.80266e+06	1.15893e+06	0.461751	0.816926	0.822918	-0.281179	insig
MW0127753	C15H14O7	(+)-Gallocatechin	Flavonoids	Flavonoid	970-73-0	33775.2	287619	155962	192443	252987	576806	141542	248598	293468	77666.3	109989	123907	0.459141	0.341004	0.663628	-0.591553	insig
MW0127002	C10H7NO4	Zeanic acid	Organic acid And Its derivatives	Organic acid And Its derivatives	-	52047.6	243911	178444	176598	329820	470481	142082	209368	250922	110775	116653	201051	0.458452	0.308006	0.710294	-0.493513	insig
MEDP2320	C8H18N2O2	N(6),N(6)-Dimethyl-L-lysine	Amino acid and Its metabolites	Amino acids	2259-86-1	2.79555e+07	2.29559e+06	1.09722e+07	11252925	1.71472e+07	8.48838e+06	1.1417e+07	5.97358e+06	2.45626e+06	1.31943e+07	2.39713e+07	3.6109e+06	0.458371	0.56094	0.776109	-0.365668	insig
MW0138757	C26H28O15	Leucoside	Carbohydrates and Its metabolites	Carbohydrates and Its metabolites	27661-51-4	680848	121491	216718	576192	268744	58952.7	190435	309859	88005.5	159756	680722	1.12472e+06	0.457912	0.601263	1.32791	0.409157	insig
MEDP0396	C9H14N3O7P	2'-Deoxycytidine-5'-Monophosphate	Nucleotide And Its metabolites	Nucleotide And Its metabolites	1032-65-1	8.69335e+06	577139	7.45002e+06	1.3578e+07	1.18829e+07	2.11893e+06	6.05544e+06	1.28914e+07	1.40685e+06	4.96973e+06	7.81298e+06	8.12049e+06	0.457729	0.851155	0.931301	-0.102681	insig
MEDP2349	C3H5N5O	Ammeline	Heterocyclic compounds	Heterocyclic compounds	645-92-1	264565	359794	199670	357561	436341	401380	307870	290656	794151	149063	320294	801145	0.457493	0.406523	1.31886	0.399287	insig
MW0166928	C8H9NO3	N-hydroxy-2-(4-hydroxyphenyl)ethanimine oxide	Others	Others	-	1.85768e+06	1.97505e+06	1.84418e+06	1.95399e+06	1.93534e+06	2.03716e+06	2.01511e+06	1.95444e+06	2.08099e+06	1.94688e+06	1.88769e+06	1.85714e+06	0.457247	0.616928	1.01197	0.0171631	insig
MW0128185	C21H26O10S	(4-{3,5-dihydroxy-2,2-dimethyl-8-oxo-6-propyl-2H,3H,4H,8H-pyrano[3,2-g]chromen-10-yl}-4-oxobutoxy)sulfonic acid	Organic acid And Its derivatives	Organic acid And Its derivatives	-	176943	49762.3	44640.3	157649	68744.7	323096	90882.6	19099.1	111055	35839.9	646246	66380.1	0.457131	0.823974	1.18112	0.240152	insig
MW0127401	C22H18N4OS	Axitinib	Others	Others	319460-85-0	231121	2.69637e+06	1.41248e+06	1.50744e+06	5.00403e+06	3.55249e+06	1.64665e+06	2.78984e+06	1.49598e+06	735123	509077	1.38193e+06	0.455412	0.247155	0.594184	-0.751018	insig
MW0013927	C27H46O4	3alpha,7alpha-Dihydroxycoprostanic acid	Organic acid And Its derivatives	Organic acid And Its derivatives	-	215057	519940	57821.2	158357	100557	227866	96520.5	137781	274684	90183	323170	115019	0.45509	0.619988	0.81069	-0.302778	insig
MW0108128	C15H21NO4	Mefenoxam	Aldehyde,Ketones,Esters	Esters	70630-17-0	649785	3.43081e+06	2.53211e+06	1.61124e+06	4.29652e+06	8.14792e+06	2.58059e+06	4.00645e+06	2.85851e+06	1.47236e+06	1.12978e+06	1.64975e+06	0.45436	0.353231	0.662724	-0.59352	insig
MW0155792	C13H20N4O7	Pro-Asn-Asp	Amino acid and Its metabolites	Small Peptide	-	1.16004e+06	702595	2.61372e+06	1.14521e+06	2.79963e+06	879242	1.27503e+06	1.56407e+06	1.57437e+06	905620	505412	1.42685e+06	0.453877	0.433564	0.779678	-0.359049	insig
MW0006692	C21H21N	Cyproheptadine	Benzene and substituted derivatives	Benzene and substituted derivatives	129-03-3	200061	755371	371477	378496	686846	861409	461140	569894	704518	267937	271822	398366	0.45186	0.468694	0.821744	-0.283239	insig
MEDP2144	C8H15NO	Pseudotropine	Others	Others	120-29-6	63688.6	163167	156451	241007	275841	190036	143054	147612	251095	72387.2	115352	186017	0.449354	0.475414	0.839777	-0.251922	insig
MEDN1862	C24H40O4	Isochodeoxycholic acid	Bile acids	Bile acids	566-24-5	1.66813e+06	7.38066e+06	624002	1.75731e+06	2.4088e+06	931431	4.49117e+06	390448	5.27518e+06	1.58627e+06	4.40629e+06	2.34202e+06	0.445913	0.64068	1.25193	0.32415	insig
MW0118342	C24H25ClFN5O3	2-Butenamide,N-[4-[(3-chloro-4-fluorophenyl)amino]-7-[[(3S)-tetrahydro-3-furanyl]oxy]-6-quinazolinyl]-4-(dimethylamino)-	Alcohol and amines	Amines	439081-18-2	37455.4	45027.1	7676.79	22060.4	20953	23462.9	26701.1	22647.8	32153.7	20000.1	22466.6	40416.7	0.444453	0.841328	1.04948	0.0696747	insig
MEDN0720	C10H11NO3	2-Methylhippuric acid	Amino acid and Its metabolites	Amino acid derivatives	42013-20-7	142011	14975.2	92278.5	26529.7	34192.4	14954.9	33727.2	40793	28846.9	44206.6	22822.1	24030.2	0.443972	0.354478	0.598341	-0.740961	insig
MEDN0061	C10H11NO3	N-Phenylacetylglycine	Amino acid and Its metabolites	Amino acid derivatives	500-98-1	142011	14975.2	92278.5	26529.7	34192.4	14954.9	33727.2	40793	28846.9	44206.6	22822.1	24030.2	0.443972	0.354478	0.598341	-0.740961	insig
MEDN1602	C10H13N5O4	3-Deoxyguanosine	Nucleotide And Its metabolites	Nucleotide And Its metabolites	3608-58-0	1.02406e+07	1.98525e+06	1.37593e+06	4.0426e+06	2.53399e+06	2.3625e+06	1.8321e+06	5.9016e+06	2.1982e+06	1.60997e+06	9.57048e+06	6.13783e+06	0.443943	0.684379	1.20892	0.273724	insig
MW0151925	C18H30O3	Juvenile hormone I	Hormones and hormone related compounds	Hormones and hormone related compounds	13804-51-8	3.91182e+06	1.93427e+06	3.81627e+06	1.58569e+06	1.95396e+06	2.59361e+06	1.90834e+06	4.26606e+06	4.6517e+06	2.3162e+06	614926	2.17013e+06	0.443531	0.977212	1.00834	0.011983	insig
MEDN1112	C16H32O3	16-Hydroxyhexadecanoic acid	FA	FFA	506-13-8	788316	1.07218e+06	1.69782e+06	1.50872e+06	705788	421597	819925	895671	386361	1.30673e+06	8.22071e+06	713663	0.442918	0.449501	1.99261	0.99466	insig
MEDN1148	C16H32O3	2-hydroxyhexadecanoic acid	FA	FFA	764-67-0	788316	1.07218e+06	1.69782e+06	1.50872e+06	705788	421597	819925	895671	386361	1.30673e+06	8.22071e+06	713663	0.442918	0.449501	1.99261	0.99466	insig
MW0137884	C28H48N2O4	Dehydrocarpaine I	Heterocyclic compounds	Heterocyclic compounds	-	1.43177e+06	2.28924e+06	286569	1.06931e+06	1.17417e+07	3.1441e+06	1.02852e+07	4.52288e+06	6.21982e+06	1.52459e+06	285573	1.31916e+06	0.442669	0.769542	1.21012	0.275148	insig
MW0052898	C16H16ClNO3	Fenoldopam	Others	Medicine	67227-56-9	152451	641759	591091	450048	294972	936408	555706	775697	586587	336434	276018	771167	0.441635	0.788868	1.07659	0.106468	insig
MW0152764	C24H38O6	Lovastatin acid(Mevinolinic acid)	Organic acid And Its derivatives	Organic acid And Its derivatives	-	102414	947225	463100	456690	859892	858519	524466	696223	289978	278729	364949	373882	0.439815	0.235463	0.685558	-0.54465	insig
MW0000433	C21H25NO4	Rotundine	Alkaloids	Alkaloids	2934-97-6	928337	5.55989e+06	2.35844e+06	3.15546e+06	5.76396e+06	1.31932e+07	4.19396e+06	6.96495e+06	5.28592e+06	2.97236e+06	5.46264e+06	2.70252e+06	0.439748	0.776237	0.890922	-0.166629	insig
MW0150383	C27H42N6O8	Gly-Ile-Asp-Lys-Phe	Amino acid and Its metabolites	Small Peptide	-	6969.73	32136.7	1612.62	13187.7	6137.52	263185	7495.68	29061.6	34139.1	8039.98	28242	51016.8	0.439649	0.545418	0.488802	-1.03268	insig
MW0063316	C22H32O5	Resolvin D2	FA	Others	810668-37-2	1.64344e+06	7.04964e+06	2.05095e+06	7.60043e+06	4.99044e+06	6.96443e+06	5.16033e+06	8.18172e+06	5.0062e+06	5.32393e+06	601804	2.59681e+06	0.438801	0.713242	0.886844	-0.173247	insig
Hmpp0004	C10H18N2O5	2,4-diacetamino-2,4,6-triphenoxy-D-mannopyranose	Carbohydrates and Its metabolites	Sugar derivatives	-	2.91145e+06	236578	3.725e+06	2.23962e+06	1.78827e+06	351832	2.46656e+06	1.18154e+06	535329	3.14677e+06	832014	2.79116e+06	0.438765	0.946602	0.973396	-0.0389012	insig
MW0158096	C23H31N9O4	Trp-Arg-His	Amino acid and Its metabolites	Small Peptide	-	3.96037e+07	5.00385e+06	8.14152e+06	2.53566e+07	1.29183e+07	759303	6.27375e+07	1.65741e+06	2.41162e+07	1.68292e+07	5.00526e+06	1.65287e+07	0.438658	0.601028	1.38232	0.467095	insig
MW0152420	C17H34N4O4S1	Leu-Lys-Met	Amino acid and Its metabolites	Small Peptide	-	1.39922e+06	1.47378e+07	3.35658e+06	1.01394e+07	7.2733e+06	2.83753e+07	6.22879e+06	1.12163e+07	7.61104e+06	2.86296e+06	2.97856e+06	8.06214e+06	0.437746	0.337545	0.596795	-0.744691	insig
MW0151855	C20H32O	Isopimaradienol	Alcohol and amines	Alcohols	-	2.14749e+06	3.97804e+06	2.05719e+06	5.51304e+06	6.15315e+06	1.49965e+06	3.14709e+06	4.23933e+06	6.82969e+06	2.15362e+06	2.41507e+06	3.75987e+06	0.437726	0.854494	1.05603	0.0786475	insig
MEDP2027	C6H13NO5	2-Amino-2-deoxymannose	Alcohol and amines	Amines	2636-92-2	289556	234875	173322	407690	330151	325746	325634	442308	296561	180896	198442	562053	0.436944	0.568034	1.13885	0.187572	insig
MEDP1761	C6H13NO5	D-Glucosamine	Carbohydrates and Its metabolites	Sugar acids	3416-24-8	289556	234875	173322	407690	330151	325746	325634	442308	296561	180896	198442	562053	0.436944	0.568034	1.13885	0.187572	insig
MEDP0161	C10H15N5O10P2	Adenosine 5'-Diphosphate（ADP）	Nucleotide And Its metabolites	Nucleotide And Its metabolites	58-64-0	44722.5	61384.2	88752.4	64372.5	75504	60538.3	97217.1	55426.4	40479.6	66603.4	57832.2	48072.5	0.436423	0.637518	0.925007	-0.112463	insig
MW0144482	C20H29N7O4	Ala-Arg-Trp	Amino acid and Its metabolites	Small Peptide	-	56021.6	91548.2	153511	229343	275040	213341	118268	122491	205543	105050	123654	102107	0.435352	0.32382	0.762769	-0.390683	insig
MW0149513	C28H39N3O8	Geldanamycin Analog	Heterocyclic compounds	Heterocyclic compounds	64202-81-9	80691.3	6450.28	10399.6	729002	46974.3	11648	52182.9	168225	58936.3	32411.5	5823.16	217550	0.433517	0.64932	0.604552	-0.726061	insig
MW0015863	C23H39NO3	Arachidonoyl Serinol	FA	Others	183718-70-9	209710	2.75173e+06	892117	1.38472e+06	2.7449e+06	6.43828e+06	1.41163e+06	3.04919e+06	3.52467e+06	506733	298289	897813	0.432129	0.478382	0.671799	-0.573898	insig
MEDP1212	C13H24N2O	1,3-Dicyclohexylurea	Alcohol and amines	Polyamines	2387-23-7	216951	177691	258661	248127	258983	192357	233324	318157	253441	232790	144376	256882	0.429151	0.609527	1.06372	0.0891204	insig
MEDP0307	C8H17NO2	Dl-2-Aminooctanoic Acid	Organic acid And Its derivatives	Organic acid And Its derivatives	644-90-6	37969	25629.5	21961.9	12813.6	269066	229379	78949	463375	96054.2	13311.2	37428.2	33533.5	0.427912	0.809664	1.21084	0.276007	insig
MW0156640	C22H40N8O10	Ser-Arg-Glu-Val-Ser	Amino acid and Its metabolites	Small Peptide	-	52983.1	111392	72134.7	120582	104316	165126	88211.8	117898	186317	82092	38473.4	75822	0.427745	0.814036	0.939798	-0.0895777	insig
MW0146479	C24H40O4	Avideoxycholate	Organic acid And Its derivatives	Organic acid And Its derivatives	-	5.22391e+07	1.82219e+08	1.19321e+07	5.88698e+07	5.95167e+07	1.27826e+08	166780437	5.71963e+07	1.11535e+08	3.39742e+07	9.4018e+07	5.50446e+07	0.42765	0.895323	1.05267	0.0740555	insig
MEDP1137	C17H14O7	Malvidin	Others	Others	10463-84-0	6081.95	42247.7	5859.94	48796.1	32385.9	81080.8	32337.4	10285.2	254981	10771.4	17460.7	83534.1	0.426727	0.460153	1.89127	0.919353	insig
MW0103061	C18H34O2	Vaccenic acid	FA	FFA	143-25-9	1.07737e+07	9.2373e+06	1.78097e+06	5.43884e+06	989436	2.24706e+06	1.71801e+06	2.92412e+06	1.6551e+07	5.99952e+06	2.5164e+06	1.73915e+07	0.425299	0.43804	1.54594	0.628481	insig
MW0014116	C19H38O3	3-hydroxypristanic acid	Organic acid And Its derivatives	Organic acid And Its derivatives	-	384025	294457	529547	613806	643757	423308	332882	575747	499989	520476	223414	484645	0.424115	0.60277	0.912857	-0.131539	insig
MW0053901	C20H38O4	3,3,14,14-Tetramethyl-hexadecanedioic acid	FA	FFA	87272-20-6	5.17825e+06	84478.6	9.92249e+06	1.50035e+06	2.618e+06	156100	2.81859e+06	1.73028e+06	2.59061e+06	1.91703e+06	426278	1.66161e+06	0.423803	0.416989	0.572692	-0.804168	insig
MW0151029	C17H29N5O4S1	His-Met-Ile	Amino acid and Its metabolites	Small Peptide	-	209308	760661	118414	349092	654417	1.06577e+06	654379	531196	484469	336209	276710	646822	0.423766	0.821084	0.927835	-0.10806	insig
MW0142598	C24H34O	3-(2,4-Cyclopentadien-1-ylidene)-5alpha-androstan-17beta-ol	Alcohol and amines	Alcohols	-	2.82786e+06	1.19415e+07	603418	3.53183e+06	3.97163e+06	9.36957e+06	1.13146e+07	3.95686e+06	7.82155e+06	1.7238e+06	5.59782e+06	3.28245e+06	0.421653	0.917294	1.045	0.0635089	insig
MW0055408	C20H41NO4S	N-stearoyl taurine	FA	FFA	63155-80-6	49515.1	1.09181e+06	15780	69358.1	523546	251445	75000.7	177133	379802	56905.5	22744.5	154552	0.421544	0.329562	0.432754	-1.20838	insig
MW0153225	C21H25N3O6	Lys-HoPhe-OH	Amino acid and Its metabolites	Small Peptide	-	3.27768e+06	9.34777e+06	9.11948e+06	7.25758e+06	1.43425e+07	1.55794e+07	1.07396e+07	1.04418e+07	8.87175e+06	5.43325e+06	2.11635e+06	1.26199e+07	0.42154	0.566891	0.852324	-0.230525	insig
MW0150813	C14H21N5O6	His-Ala-Glu	Amino acid and Its metabolites	Small Peptide	-	885526	6.41297e+06	2.32459e+06	3.20185e+06	6.22716e+06	1.43958e+07	4.61209e+06	7.16887e+06	5.27409e+06	3.14384e+06	5.6083e+06	2.8283e+06	0.421201	0.713359	0.856123	-0.22411	insig
MW0110249	C20H31N5O6	Tyr-Gln-Lys	Amino acid and Its metabolites	Small Peptide	-	815604	449161	456404	1.24275e+07	1.11951e+06	3.65805e+06	1.39399e+06	834755	2.38087e+06	893380	1.15835e+06	720029	0.420991	0.364286	0.390007	-1.35843	insig
MW0159180	C19H34N4O8	Val-Thr-Ile-Asp	Amino acid and Its metabolites	Small Peptide	-	297380	3.93146e+06	248415	754605	800155	2.92473e+06	559969	1.13401e+06	1.15029e+06	618257	444926	840517	0.420871	0.322625	0.530101	-0.915662	insig
MW0137952	C18H20O2	Diethylstilbestrol	Heterocyclic compounds	Heterocyclic compounds	56-53-1	1.08741e+06	619391	1.08574e+06	423698	1.64963e+06	2.58727e+06	2.46775e+06	2.38756e+06	1.04307e+06	788100	329640	1.83368e+06	0.419541	0.640371	1.18739	0.247795	insig
MW0168269	C17H22O3	Podocarpic acid	Terpenoids	Ditepenoids	5947-49-9	620655	61802.5	390411	1.79114e+06	759182	223572	540944	765297	415519	522879	234127	549567	0.419383	0.622166	0.787241	-0.345122	insig
MW0150388	C14H27N3O4	Gly-Ile-Ile	Amino acid and Its metabolites	Small Peptide	-	2.0512e+06	444184	2.00192e+06	2.81008e+06	3.23054e+06	697082	4.53751e+06	2.17576e+06	1.34665e+06	658834	866371	3.25101e+06	0.417043	0.735552	1.14251	0.19221	insig
MW0156823	C20H37N5O8	Ser-Leu-Lys-Glu	Amino acid and Its metabolites	Small Peptide	-	242720	119070	268212	187853	850819	369882	2.32161e+06	943940	125523	136747	83151.9	344107	0.416966	0.425626	1.94014	0.95616	insig
FDATN01288	C26H34O8	Methylprednisolone hemisuccinate	Hormones and hormone related compounds	Hormones and hormone related compounds	2921-57-5	8.93971e+06	2.18231e+07	2.55226e+06	9.42471e+06	7.2127e+06	1.23966e+07	1.2258e+07	7.98993e+06	1.30284e+07	6.07322e+06	1.70555e+07	8.74005e+06	0.415879	0.884412	1.04484	0.0632869	insig
MEDP0390	C10H12N4O5	Hypoxanthine-9-β-D-Arabinofuranoside	Nucleotide And Its metabolites	Nucleotide And Its metabolites	7013-16-3	7.54293e+07	655436	1.80761e+07	9.5678e+07	1.23054e+07	5.51184e+06	6.87536e+06	8.14614e+06	4.74602e+06	5.37662e+07	1.13511e+08	2.68776e+07	0.415655	0.966043	1.03018	0.0428924	insig
MW0151251	C15H27O4P	hydroxy Farnesyl Phosphonic Acid	Organic acid And Its derivatives	Organic acid And Its derivatives	148796-53-6	8126.04	6836.91	18342.3	6981.48	6956.55	3509.05	6353.05	5976.65	20678.4	6767.17	5009.57	3565.08	0.414123	0.905978	0.952663	-0.0699618	insig
MEDP0058	C11H20N2O6	L-Saccharopine	Amino acid and Its metabolites	Amino acids	997-68-2	1.69944e+06	2.05901e+06	2.65472e+06	3.52304e+06	2.87401e+06	2.06509e+06	1.97605e+06	3.95014e+06	2.77083e+06	1.82636e+06	2.17014e+06	3.16324e+06	0.41238	0.712301	1.06598	0.0921791	insig
MEDP1295	C9H13N3O5	Cytarabine	Nucleotide And Its metabolites	Nucleotide And Its metabolites	147-94-4	3.24129e+07	2.62481e+06	1.78671e+07	4.67818e+06	4.62309e+06	1.13788e+06	6.25828e+06	3.23908e+06	3.87328e+06	1.94242e+07	1.61451e+07	7.10958e+06	0.411904	0.837186	0.884845	-0.176504	insig
MEDN0827	C7H14N2O3	N-acetylornithine	Amino acid and Its metabolites	Amino acid derivatives	6205-08-9	1.13254e+06	1.69663e+06	1.25359e+06	903275	1.19744e+06	1.1017e+06	679951	2.24057e+06	966657	445900	1.16762e+06	1.96683e+06	0.411155	0.925194	1.02503	0.0356683	insig
MEDL01856	C9H6O3	7-Hydroxycoumarin	Lignans and Coumarins	Lignans	93-35-6	46378.6	43669.1	67790.3	58812.6	50191.6	52460.3	49545.5	59233.5	54223.6	52917.8	56043.3	52945.7	0.410638	0.815933	1.01756	0.0251136	insig
MEDP0209	C6H6O6	Cis-Aconitic Acid	Organic acid And Its derivatives	Organic acid And Its derivatives	585-84-2	1.09694e+06	443385	565617	674451	954390	597562	777637	921523	264343	523547	986681	456930	0.410248	0.674874	0.907284	-0.140375	insig
MW0003246	C22H36O2	2-Methyl-5-(8-pentadecenyl)-1,3-benzenediol	Benzene and substituted derivatives	Phenolics	-	83070.7	67435.2	42560.9	117642	71755	86693.1	75094.9	88658.8	145965	80320.7	40114	109405	0.409912	0.524004	1.15006	0.20171	insig
MW0152097	C24H48NO9P	L-a-Lysophosphatidylserine	Amino acid and Its metabolites	polypeptide	-	180208	577840	648434	527423	1.51922e+06	1.80504e+06	785006	1.15922e+06	591212	428833	151793	616583	0.409316	0.413912	0.709876	-0.494361	insig
MW0134614	C17H14O3	5-Methyl-7-methoxyisoflavone	Flavonoids	Flavonoid	82517-12-2	1.60037e+06	3.4148e+06	2.00822e+06	3.24347e+06	3.91043e+06	1.71329e+06	2.41949e+06	2.90596e+06	2.84062e+06	2.12407e+06	2.80474e+06	2.67378e+06	0.408985	0.963269	0.992326	-0.0111134	insig
MEDP1766	C14H20N2O4	Val-Tyr	Amino acid and Its metabolites	Small Peptide	3061-91-4	5.67373e+06	1.26794e+06	4.62268e+06	4.09416e+06	4.27443e+06	1.24805e+06	4.4273e+06	3.15212e+06	3.83677e+06	2.99882e+06	1.45442e+06	6.62093e+06	0.407964	0.836631	1.06182	0.0865363	insig
MW0012541	C19H28O3	16alpha-Hydroxydehydroepiandrosterone	Hormones and hormone related compounds	Hormones and hormone related compounds	1232-73-1	2.92543e+07	355392	4.76536e+07	2.48578e+07	1.07101e+07	475624	1.71797e+07	3.28089e+06	1.07716e+06	2.29991e+07	376769	4.96098e+06	0.407804	0.251248	0.440172	-1.18386	insig
MEDP1058	C26H45NO6S	Tauroursodeoxycholic acid	Bile acids	Bile acids	14605-22-2	840223	135308	200222	505395	293836	21029.6	1.50464e+06	46327.8	550411	351414	103561	343871	0.407503	0.562351	1.45301	0.539043	insig
MW0159269	C20H22N2O6	Val-HoPhe-OH	Amino acid and Its metabolites	Small Peptide	-	65145.4	442913	180032	327156	376227	572677	256487	373992	531802	194652	254520	311704	0.407465	0.940637	0.97913	-0.030428	insig
MEDN0153	C10H14N5O7P	Adenosine 5'-Monophosphate	Nucleotide And Its metabolites	Nucleotide And Its metabolites	61-19-8	345367	37789.1	4.5101e+06	1.0545e+06	657871	69569.8	1.51736e+06	214590	85679.7	2.78117e+06	499926	332099	0.404916	0.806224	0.813582	-0.297641	insig
MW0055436	C18H36O	Octadecanal	FA	Others	638-66-4	307604	494156	337899	376688	536019	619832	245061	601447	715851	235334	533454	889794	0.404399	0.46077	1.20535	0.269455	insig
MEDN1532	C6H10O7	D-Galacturonic Acid	Carbohydrates and Its metabolites	Sugar acids	685-73-4	1.64002e+06	2.89433e+06	9	1.54983e+06	9	717801	880828	1.75749e+06	1.06178e+06	1.28503e+06	2.56037e+06	9	0.402654	0.834503	1.10931	0.149661	insig
MW0155330	C24H35N9O6	Phe-Ser-His-Arg	Amino acid and Its metabolites	Small Peptide	-	1.18822e+06	31093.1	175366	1.14944e+07	874742	172810	749958	2.77126e+06	844766	476786	38687.7	3.59632e+06	0.402301	0.654587	0.608309	-0.717123	insig
MW0144614	C14H25N3O6	Ala-Ile-Glu	Amino acid and Its metabolites	Small Peptide	-	1.70474e+06	1.1061e+06	3.95048e+06	3.56757e+06	3.98758e+06	1.34939e+06	4.74498e+06	2.79836e+06	2.15453e+06	2.4567e+06	1.27641e+06	2.42109e+06	0.400311	0.966872	1.01189	0.017048	insig
MW0142575	C14H28O3	2S-Hydroxytetradecanoic acid	Organic acid And Its derivatives	Organic acid And Its derivatives	-	120884	772803	58385.4	75161	26108.7	67784.9	65708.6	156739	141327	163990	102838	199528	0.400251	0.700663	0.740443	-0.433539	insig
MW0108189	C15H21NO4	Metalaxyl	Amino acid and Its metabolites	Amino acid derivatives	102256-63-3	580336	3.02426e+06	2.42059e+06	1.33138e+06	4.42274e+06	7.88482e+06	2.52903e+06	3.93403e+06	2.59047e+06	1.29049e+06	1.01732e+06	1.52786e+06	0.400157	0.364081	0.655468	-0.609404	insig
MW0012363	C20H34O4	14,15-Dihydroxy-5Z,8Z,11Z-eicosatrienoic acid	FA	Oxidized lipids	192461-94-2	226828	2.17834e+06	80351.4	372427	756854	3.52065e+06	351682	4.74312e+06	4.31042e+06	1.01829e+06	85385.2	634279	0.399778	0.530686	1.56166	0.643083	insig
MW0017043	C24H40O7S	Chenodeoxycholic acid sulfate	Aldehyde,Ketones,Esters	Esters	-	1.56424e+06	1.03694e+07	1.86777e+06	9.22623e+06	5.20011e+06	6.96011e+06	5.60074e+06	5.48366e+06	3.02585e+06	4.32487e+06	9.21303e+06	5.72516e+06	0.398838	0.865078	0.948432	-0.0763839	insig
MW0107931	C24H38O6	Lovastatin acid	Organic acid And Its derivatives	Organic acid And Its derivatives	75225-51-3	519284	5.96902e+06	1.38439e+06	2.83763e+06	2.98326e+06	3.43767e+06	1.79213e+06	2.00428e+06	1.83318e+06	2.00868e+06	2.00848e+06	1.7645e+06	0.398378	0.269689	0.666107	-0.586174	insig
MEDP0295	C6H11NO3	4-Acetamidobutyric Acid	Organic acid And Its derivatives	Organic acid And Its derivatives	3025-96-5	872061	723241	938375	635543	1.05969e+06	679431	1.07923e+06	370919	535331	678427	852001	1.16361e+06	0.398179	0.797272	0.95338	-0.0688765	insig
MW0150078	C27H46N8O9	Glu-Lys-Leu-Thr-His	Amino acid and Its metabolites	Small Peptide	-	1.62205e+06	3.06811e+06	9.71979e+06	3.45951e+06	8.7671e+06	3.82674e+06	6.06898e+06	5.39369e+06	4.01246e+06	4.03129e+06	1.90902e+06	1.67571e+06	0.396886	0.449128	0.757999	-0.399731	insig
MW0012516	C22H36O6	16,16-Dimethyl-6-ketoprostaglandin E1	Hormones and hormone related compounds	Hormones and hormone related compounds	75874-32-7	230729	355521	1.51304e+06	2.59258e+06	1.4429e+06	668325	932729	1.2561e+06	558234	1.00366e+06	292966	368799	0.396406	0.35094	0.648601	-0.624597	insig
MW0126529	C12H18N2O3	Secobarbital	Heterocyclic compounds	Heterocyclic compounds	76-73-3	1.08605e+06	207150	300544	210801	373033	267854	249612	238656	408282	267442	1.30926e+06	410242	0.394712	0.744869	1.17913	0.237727	insig
MEDP2350	C11H16N4O3	His-Pro	Amino acid and Its metabolites	Small Peptide	20930-58-9	1.66874e+06	2.55996e+06	1.40262e+06	2.5085e+06	2.02059e+06	2.83469e+06	3.2971e+06	3.77737e+06	2.52351e+06	2.40468e+06	649260	3.61789e+06	0.393432	0.331642	1.252	0.32423	insig
MW0103123	C22H34O3	Volemolide	Aldehyde,Ketones,Esters	Esters	-	1.13511e+06	92128.8	6.06685e+06	2.55805e+06	5.57629e+06	981362	4.70624e+06	8.66407e+06	1.08214e+06	2.4963e+06	63607.7	5.73684e+06	0.392907	0.540564	1.38632	0.471259	insig
MEDP0055	C7H15N3O3	L-Homocitrulline	Amino acid and Its metabolites	Amino acids	1190-49-4	856451	1.86995e+06	431305	587769	1.24415e+06	842253	676313	1.82308e+06	1.75912e+06	510277	713363	1.19068e+06	0.392778	0.666709	1.1442	0.19434	insig
MW0140461	C10H16O2	(6E)-8-Oxogeraniol	Alcohol and amines	Alcohols	-	1.28316e+06	113747	1.25492e+06	533511	1.4464e+06	95612.9	701462	703747	816696	934556	157906	652994	0.391485	0.658203	0.839236	-0.252852	insig
MEDP2075	C19H22O3	Auraptene	Benzene and substituted derivatives	Benzene and substituted derivatives	495-02-3	2.12804e+06	6.17143e+06	1.68308e+06	3.60184e+06	910708	1.02342e+06	2.02881e+06	1.71487e+06	8.84736e+06	4.27161e+06	586005	5.8909e+06	0.391359	0.410146	1.50398	0.588786	insig
MW0160114	C30H50O2	(3S,6aR,6bS,8aR,9R,14bR)-4,4,6a,6b,8a,11,11,14b-octamethyl-1,2,3,4a,5,6,7,8,9,10,12,12a,14,14a-tetradecahydropicene-3,9-diol	Alcohol and amines	Alcohols	-	997665	150386	2.26788e+06	855333	2.44617e+06	779796	1.67352e+06	2.67613e+06	703975	1.25514e+06	197554	1.52865e+06	0.390344	0.863701	1.07173	0.0999348	insig
MEDN0376	C18H34O4	9,10-DiHOME	FA	Oxidized lipids	-	185127	139364	92014.1	156601	111802	108777	199107	169269	186290	191041	70145.9	100258	0.38825	0.457438	1.15425	0.206957	insig
MEDN0541	C8H10O4	DL-3,4-Dihydroxyphenyl glycol	Benzene and substituted derivatives	Benzene and substituted derivatives	28822-73-3	239243	268599	453614	262798	318612	130523	336933	219700	225384	338123	387845	211638	0.38759	0.888273	1.02763	0.0393188	insig
MEDP0171	C10H12N4O5	Inosine	Nucleotide And Its metabolites	Nucleotide And Its metabolites	58-63-9	7.38831e+07	723278	1.67393e+07	8.8598e+07	1.21218e+07	5.56868e+06	6.47008e+06	7.46184e+06	4.46953e+06	52999229	1.20096e+08	2.4623e+07	0.386874	0.900892	1.09353	0.128997	insig
MW0001245	C24H34O2	1,1'-[1,12-Dodecanediylbis(oxy)]bisbenzene	Benzene and substituted derivatives	Phenolics	-	1.14737e+06	1.03646e+07	918985	4.74716e+06	3.861e+06	3.50895e+06	1.4984e+07	2.67919e+06	7.61569e+06	1.57349e+06	3.57171e+06	1.45801e+06	0.384693	0.644854	1.29876	0.377136	insig
MW0139712	C25H22O10	Silychristin	Heterocyclic compounds	Heterocyclic compounds	33889-69-9	148269	50301.6	35448.1	665138	92233.7	50903.5	98277	31851.1	65808	35887.1	241407	128665	0.384649	0.509509	0.577471	-0.792178	insig
MEDP2369	C9H12N2O2	L-Tyrosinamide	Amino acid and Its metabolites	Amino acid derivatives	4985-46-0	31192.9	76854.7	64554.8	64122.1	122689	109128	89438.8	120704	108722	37593.9	36372.3	140711	0.383779	0.639321	1.13873	0.187424	insig
MW0055073	C22H38O5	Misoprostol	FA	Oxidized lipids	59122-46-2	1.89715e+06	7.05312e+07	658859	2.3177e+06	1.0677e+07	4.73114e+07	6.18781e+06	1.23493e+07	1.43525e+07	3.39897e+06	1.96116e+06	2.2106e+06	0.382485	0.259176	0.303316	-1.72111	insig
MEDP0186	C15H11I4NO4	L-Thyroxine	Hormones and hormone related compounds	Hormones and hormone related compounds	51-48-9	240058	377119	175027	470702	148208	315156	263911	262678	392312	166239	437755	393237	0.380692	0.642859	1.10999	0.150541	insig
MW0145835	C23H34N6O8	Asn-Lys-Phe-Asp	Amino acid and Its metabolites	Small Peptide	-	583826	1.81652e+06	1.24914e+06	1.11818e+06	2.82076e+06	3.62913e+06	1.81617e+06	2.15112e+06	1.64014e+06	1.03784e+06	436484	1.75381e+06	0.380171	0.479237	0.787655	-0.344365	insig
MEDN1951	C2H4O5S	Sulfoacetic acid	Organic acid And Its derivatives	Organic acid And Its derivatives	123-43-3	1.74028e+06	1.79127e+06	6.46548e+06	4.43991e+06	3.99858e+06	2.5035e+06	3.78248e+06	2.61891e+06	2.44719e+06	3.2309e+06	2.26122e+06	2.3972e+06	0.379834	0.409079	0.799364	-0.323076	insig
MEDP2317	C9H19N5O3	Ala-Arg	Amino acid and Its metabolites	Small Peptide	16709-12-9	257661	174364	339758	389291	443981	218768	361339	367583	458678	122163	146438	1.03504e+06	0.378216	0.462885	1.36594	0.449899	insig
MEDN1621	C6H8O7	Isocitric acid	Organic acid And Its derivatives	Organic acid And Its derivatives	320-77-4	1.13594e+06	1.82574e+06	1.09022e+06	1.13954e+06	713051	1.22605e+06	813787	2.85536e+06	1.09271e+06	643917	1.26983e+06	2.42231e+06	0.377835	0.439253	1.27591	0.351525	insig
MW0013347	C27H46O2	27-Hydroxycholesterol	Hormones and hormone related compounds	Hormones and hormone related compounds	20380-11-4	105910	639488	51703.8	199758	532840	1.24842e+06	173702	1.52908e+06	1.29181e+06	384187	55051.7	323636	0.376596	0.615588	1.35252	0.435654	insig
MW0145480	C17H28N8O4	Arg-Pro-His	Amino acid and Its metabolites	Small Peptide	-	695522	175379	545148	895476	1.12329e+06	424392	1.01528e+06	450854	386863	549596	201606	463092	0.376424	0.475184	0.794799	-0.331338	insig
MEDN1815	C20H34O5	8-iso Prostaglandin E1	FA	Oxidized lipids	21003-46-3	668080	816754	877836	1.94218e+06	2.09449e+06	1.31222e+06	1.5506e+06	3.42452e+06	2.60732e+06	1.28962e+06	168964	2.18202e+06	0.373515	0.297949	1.45535	0.541371	insig
MEDN1813	C20H34O5	ent-Prostaglandin F2α	FA	Oxidized lipids	54483-31-7	668080	816754	877836	1.94218e+06	2.09449e+06	1.31222e+06	1.5506e+06	3.42452e+06	2.60732e+06	1.28962e+06	168964	2.18202e+06	0.373515	0.297949	1.45535	0.541371	insig
MEDN0689	C6H4O5	2,5-Furandicarboxylicacid	Organic acid And Its derivatives	Organic acid And Its derivatives	3238-40-2	230114	305707	232202	205558	296374	353796	242491	267641	227301	334192	276582	186985	0.373315	0.643102	0.94546	-0.0809113	insig
MEDN0381	C16H32O2	FFA(16:0)	FA	FFA	57-10-3	859445	348225	1.15417e+06	512874	482300	413707	616107	318427	259824	1.05502e+06	896863	344503	0.372299	0.807457	0.92575	-0.111305	insig
MEDP1444	C18H26O2	FFA(18:5)	FA	FFA	-	7.00157e+06	286516	5.83434e+06	7.1677e+06	7.19284e+06	982533	6.34788e+06	5.60335e+06	5.94455e+06	6.85094e+06	341360	4.54214e+06	0.371486	0.90825	1.04092	0.0578558	insig
MEDP1794	C8H11NO3	Oxidopamine	Alcohol and amines	Polyamines	1199-18-4	93144.7	472647	125986	239016	324265	404398	164993	500455	195345	42843	182916	443146	0.369796	0.825112	0.921807	-0.117463	insig
MW0151597	C20H32N6O8	Ile-Thr-His-Asp	Amino acid and Its metabolites	Small Peptide	-	317460	1.74667e+06	473139	878329	979045	1.80096e+06	729806	1.76439e+06	980705	689381	306451	655971	0.369344	0.596738	0.827475	-0.273213	insig
MEDN0311	C12H22O4	Dodecanedioic Acid	FA	FFA	693-23-2	2.63006e+06	2.0435e+06	5.96607e+06	3.91298e+06	3.96439e+06	2.08124e+06	3.65424e+06	3.93511e+06	1.61381e+06	5.2922e+06	5.15317e+06	2.29076e+06	0.369267	0.800981	1.06511	0.0909966	insig
MW0157393	C23H41NO2	Terminaline	Hormones and hormone related compounds	Hormones and hormone related compounds	15112-49-9	498207	3.91528e+06	1.60059e+06	2.09449e+06	3.55707e+06	3.50086e+06	3.16924e+06	5.33034e+06	3.03661e+06	760737	487332	1.19558e+06	0.368401	0.837806	0.921758	-0.11754	insig
MEDP1155	C26H45NO7S	Taurocholic acid	Bile acids	Bile acids	81-24-3	5.33392e+06	889470	1.49168e+06	4.20543e+06	2.58064e+06	562589	8.98627e+06	672651	3.914e+06	2.45295e+06	920224	2.6722e+06	0.368006	0.618517	1.30235	0.38112	insig
MEDN0417	C6H12O4	(Rs)-Mevalonic Acid	Organic acid And Its derivatives	Organic acid And Its derivatives	150-97-0	1.29239e+07	113741	1.90824e+07	1.28803e+06	3.27951e+06	107055	1.24132e+06	953517	1.69286e+06	3.78222e+06	180547	832371	0.366373	0.211709	0.235981	-2.08326	insig
MEDP0156	C10H14N2O6	5-Methyluridine	Nucleotide And Its metabolites	Nucleotide And Its metabolites	1463-10-1	2.63903e+06	299309	1.7884e+06	4.3291e+06	1.82531e+06	991941	451375	1.03827e+06	1.74579e+06	1.5966e+06	6.98769e+06	3.48084e+06	0.363676	0.628108	1.28868	0.365889	insig
MW0116759	C24H22N4O2	1-[(3R)-2-Keto-1-methyl-5-phenyl-3H-1,4-benzodiazepin-3-yl]-3-(m-tolyl)urea	Benzene and substituted derivatives	Benzene and substituted derivatives	118101-09-0	921800	696399	332660	1.4512e+06	3.32032e+06	974220	903872	1.12938e+06	548870	806516	1.41947e+06	432842	0.363561	0.406022	0.680944	-0.554392	insig
MW0165371	C15H18N4O4S	2-[[(2R)-2-azaniumyl-3-[(E)-N-hydroxy-C-(1H-indol-3-ylmethyl)carbonimidoyl]sulfanylpropanoyl]amino]acetate	Aldehyde,Ketones,Esters	Esters	-	133333	698934	897489	1.65549e+06	1.13825e+06	1.59764e+06	789001	1.02453e+06	916227	613588	284838	596757	0.362639	0.26108	0.690222	-0.534867	insig
MEDP1023	C16H19N3O5	Trp-Glu	Amino acid and Its metabolites	Small Peptide	36099-95-3	482714	627919	419164	905375	597371	905505	926578	410041	1.54629e+06	554590	301827	1.36458e+06	0.362618	0.422951	1.29605	0.37412	insig
MW0014014	C20H26O	3-Dehydroretinal	Aldehyde,Ketones,Esters	Aldehydes	472-87-7	2.47165e+06	197698	3.18939e+06	3.92913e+06	2.21937e+06	157032	2.74353e+06	1.28029e+06	273588	2.65394e+06	68388.2	1.25457e+06	0.362346	0.429997	0.680214	-0.555939	insig
MW0157397	C32H41NO5	Terpendole C	Heterocyclic compounds	Heterocyclic compounds	-	4.26464e+06	1.76715e+06	803385	2.87462e+06	1.61502e+06	343132	6.02297e+06	554619	2.70012e+06	2.04285e+06	817177	2.32969e+06	0.361101	0.649074	1.23993	0.310257	insig
MEDN2153	C10H10O4	(E)-3-(3-hydroxy-4-methoxyphenyl)acrylic acid	Benzene and substituted derivatives	Benzene and substituted derivatives	25522-33-2	11296	60506.1	18629.7	14115.9	3887.31	5202.52	15164.7	11724	17703.6	19345	24693.2	10720.9	0.361006	0.797939	0.874284	-0.193826	insig
MW0148196	C19H32O4	Decylubiquinol	Benzene and substituted derivatives	Benzene and substituted derivatives	-	2.77446e+06	2.84662e+06	2.63663e+06	8.02773e+06	3.47689e+06	4.57984e+06	4.22053e+06	5.24872e+06	3.33669e+06	5.27903e+06	1.09849e+06	3.20074e+06	0.360641	0.765309	0.919564	-0.120978	insig
MW0014433	C27H46O3	4beta,7alpha-dihydroxycholesterol	Hormones and hormone related compounds	Hormones and hormone related compounds	-	2.28291e+06	844754	3.00327e+06	1.19218e+06	774767	1.47637e+06	1.26933e+06	1.20136e+06	976934	1.59037e+06	2.1152e+06	1.03519e+06	0.359871	0.5803	0.85525	-0.225581	insig
MEDP1753	C6H13NO6	D-Glucosaminic acid	Carbohydrates and Its metabolites	Sugar acids	3646-68-2	190831	247899	143727	333650	129603	296288	207290	246795	199804	416832	174643	211291	0.359397	0.707238	1.08544	0.118275	insig
MW0152242	C21H38N8O8	Leu-Asn-Arg-Glu	Amino acid and Its metabolites	Small Peptide	-	138172	87963.9	37945.8	117210	113357	203955	45169.9	100040	123334	68155.7	162216	109318	0.358571	0.604091	0.870642	-0.199849	insig
MEDP2438	C10H18N2O5	Asp-Ile	Amino acid and Its metabolites	Small Peptide	-	3.01926e+06	258316	3.77929e+06	2.42662e+06	1.90044e+06	389469	2.53494e+06	1.14922e+06	531685	3.32538e+06	824537	2.9581e+06	0.358308	0.923104	0.961819	-0.0561633	insig
MEDP2437	C10H18N2O5	Asp-Leu	Amino acid and Its metabolites	Small Peptide	3062-14-4	3.01926e+06	258316	3.77929e+06	2.42662e+06	1.90044e+06	389469	2.53494e+06	1.14922e+06	531685	3.32538e+06	824537	2.9581e+06	0.358308	0.923104	0.961819	-0.0561633	insig
MEDP1935	C10H18N2O5	Ile-Asp	Amino acid and Its metabolites	Small Peptide	-	3.01926e+06	258316	3.77929e+06	2.42662e+06	1.90044e+06	389469	2.53494e+06	1.14922e+06	531685	3.32538e+06	824537	2.9581e+06	0.358308	0.923104	0.961819	-0.0561633	insig
MEDN0103	C24H40O4	Ursodeoxycholic Acid	Bile acids	Bile acids	128-13-2	1.99421e+06	1.73278e+07	1.86504e+06	6.8185e+06	5.83247e+06	2.62536e+07	6.47069e+06	7.18804e+06	7.31096e+06	2.66281e+06	4.6415e+06	6.00346e+06	0.357922	0.333547	0.57042	-0.809904	insig
MW0016137	C27H40O2	beta-Micropteroxanthin	Alcohol and amines	Alcohols	-	74746.5	182857	176461	237369	347096	961043	182173	196307	877920	152923	700294	143219	0.357838	0.812442	1.13804	0.186553	insig
MEDP0045	C7H12N2O3	Gly-Pro	Amino acid and Its metabolites	Small Peptide	704-15-4	132836	318641	138029	264853	380334	205132	309606	321591	208974	186546	32986.5	338084	0.357568	0.912977	0.970803	-0.0427493	insig
MW0118364	C11H18O4	2-Carboxy-5,7-dimethyl-4-octanolide	Heterocyclic compounds	Heterocyclic compounds	-	29786.8	119756	119601	207434	252840	26735.4	291140	84316.4	29822.1	71373.3	79178.1	27438.5	0.353836	0.610531	0.771362	-0.374519	insig
MW0012375	C23H32O3	14-HDoHE	FA	Oxidized lipids	-	785101	3.55672e+07	950611	2.36672e+06	1.26142e+07	2.41316e+07	2.33539e+06	1.57082e+07	1.55219e+07	1.9711e+06	1.42329e+06	2.00219e+06	0.350655	0.371766	0.509871	-0.971795	insig
MEDP0313	C3H7N3O2	Guanidineacetic Acid	Organic acid And Its derivatives	Organic acid And Its derivatives	352-97-6	136244	28063.5	8951.93	53991	10797.7	11204.5	23133	24309	399778	13506.6	42584.9	16992.8	0.350113	0.51861	2.08746	1.06175	insig
MEDN1721	C9H10O2	M-toluene acetic acid	Organic acid And Its derivatives	Organic acid And Its derivatives	621-36-3	185983	1.27433e+06	358659	588976	704016	49822.4	338837	119729	272012	533547	1.0258e+06	828537	0.349934	0.975487	0.986298	-0.0199048	insig
MW0140358	C20H28O2	(3R)-11-cis-3-Hydroxyretinal	Aldehyde,Ketones,Esters	Aldehydes	-	3.92696e+06	864114	487534	1.73859e+06	624984	303847	1.63517e+06	302740	701526	605487	1.12545e+06	1.13045e+06	0.349913	0.516176	0.692272	-0.530588	insig
MEDP0880	C6H10N2O4	N-Alpha-Acetyl-L-Asparagine	Amino acid and Its metabolites	Amino acid derivatives	4033-40-3	1.92762e+06	2.3223e+06	1.97473e+06	1.70622e+06	2.14914e+06	2.12648e+06	2.09191e+06	4.41811e+06	1.39413e+06	1.15761e+06	1.95235e+06	3.43614e+06	0.349176	0.505379	1.18382	0.243446	insig
MEDN0180	C8H11NO3	Norepinephrine	Hormones and hormone related compounds	Hormones and hormone related compounds	51-41-2	49691	34302	81916.5	65962.7	64016.6	47493.8	41883.6	64631.7	83860.6	40686.5	37165.8	54689.9	0.349063	0.741023	0.940403	-0.0886489	insig
MW0011173	C29H46O5	(3beta,17alpha,23S)-17,23-Epoxy-3,28,29-trihydroxy-27-norlanost-8-en-24-one	Aldehyde,Ketones,Esters	Ketones	-	1.96388e+07	5.36611e+07	6.67652e+06	2.43691e+07	1.71758e+07	4.51416e+07	3.52489e+07	4.97532e+06	2.34689e+07	6.75466e+06	6.50905e+07	2.90537e+07	0.347415	0.976871	0.987574	-0.0180388	insig
MW0012293	C20H32F2O5	13,14-Dihydro-16,16-difluoroprostaglandin D2	Hormones and hormone related compounds	Hormones and hormone related compounds	-	81738.9	239589	125356	171920	211826	440805	157526	198091	311140	113700	117031	167121	0.346661	0.577771	0.837461	-0.255906	insig
MW0122923	C22H20O7	Artonin L	Heterocyclic compounds	Heterocyclic compounds	-	58688.5	134496	44754.7	137031	102864	49404.2	86328.4	49602	136171	74292.3	84283.3	118596	0.345291	0.868069	1.04179	0.0590683	insig
MEDP2572	C10H18N2O5	Leu-Asp	Amino acid and Its metabolites	Small Peptide	32949-40-9	3.50295e+07	3.06908e+06	3.13388e+07	2.35419e+07	1.41943e+07	3.75327e+06	2.05501e+07	1.69302e+07	5.14387e+06	2.75753e+07	1.09409e+07	1.78483e+07	0.345067	0.764815	0.892378	-0.164273	insig
MEDP1713	C11H14N4O5	1-Methylinosine	Nucleotide And Its metabolites	Nucleotide And Its metabolites	2140-73-0	447991	68197.7	197419	737676	291453	185760	45829.6	155181	207727	334780	805913	192535	0.344766	0.837064	0.903277	-0.14676	insig
MEDP1897	C5H9NO	2-Hydroxy-2-methylbutanenitrile	Others	Others	4111-08-4	1.90388e+06	656917	713713	920772	894778	616038	1.21826e+06	1.28554e+06	1.85037e+06	817450	709138	526374	0.34425	0.684157	1.12285	0.167171	insig
MW0143503	C20H34O2	5(Z),8(Z),14(Z)-Eicosatrienoic Acid	Organic acid And Its derivatives	Organic acid And Its derivatives	90105-02-5	480272	848746	584468	663377	1.39535e+06	695556	679982	2.47334e+06	1.86727e+06	867625	89474.7	1.71388e+06	0.343262	0.235519	1.6478	0.720544	insig
MEDN1615	C17H31N3O4	Ile-Pro-Ile	Amino acid and Its metabolites	Small Peptide	90614-48-5	166886	1.69632e+06	318847	368314	792077	2.24853e+06	473039	966838	1.20357e+06	497447	25586.7	1.86693e+06	0.341379	0.836233	0.900274	-0.151563	insig
MEDP0152	C10H14N5O7P	3'-Adenylic acid	Nucleotide And Its metabolites	Nucleotide And Its metabolites	84-21-9	4.00226e+06	337243	4.78337e+07	1.50345e+07	1.08257e+07	829757	2.30309e+07	2.76097e+06	964753	2.73941e+07	4.5213e+06	3.4423e+06	0.340693	0.757001	0.787622	-0.344425	insig
MW0126824	C22H26N2O4	Tofisopam	Heterocyclic compounds	Heterocyclic compounds	22345-47-7	1.0201e+07	3.02547e+06	1.12599e+07	9.33046e+06	6.86484e+06	4.17813e+06	9.74211e+06	5.90103e+06	5.4682e+06	9.25409e+06	5.8615e+06	8.21389e+06	0.339898	0.965686	0.990662	-0.0135353	insig
MW0150162	C20H30N6O10	Glu-Thr-His-Glu	Amino acid and Its metabolites	Small Peptide	-	468819	2.90546e+06	323170	708129	966416	910684	1.00308e+06	553980	536126	803801	2.77491e+06	142938	0.338902	0.888285	0.925535	-0.11164	insig
MEDN1415	C18H30O3	13(S)-HOTrE(γ)	FA	Oxidized lipids	74784-20-6	839871	64349.5	636292	884672	826199	119034	774638	638900	375783	783215	103880	448154	0.338312	0.831367	0.927057	-0.109269	insig
MW0012479	C21H34O5	15-methyl-15R-PGD2	Hormones and hormone related compounds	Hormones and hormone related compounds	210978-26-0	419158	625047	990976	1.69919e+06	1.33992e+06	1.76578e+06	392105	2.1367e+06	2.50041e+06	575620	444427	823901	0.338027	0.990341	1.00484	0.00696152	insig
MW0012592	C22H32O3	17(R)-HDoHE	FA	Oxidized lipids	155976-53-7	1.08039e+06	3.91847e+07	1.32989e+06	2.79437e+06	1.32203e+07	1.8126e+07	3.09807e+06	1.40745e+07	1.79529e+07	2.46241e+06	1.75563e+06	2.45002e+06	0.338013	0.425772	0.551834	-0.857693	insig
MEDN0338	C9H10O3	Phenyllactate(Pla)	Organic acid And Its derivatives	Organic acid And Its derivatives	828-01-3	327832	92001.2	30467	6021.47	53662	35253.7	62492.8	74624.8	314521	11231.2	98239.9	41355.7	0.337409	0.888069	1.10496	0.143993	insig
MEDN1717	C9H10O3	Tropine	Organic acid And Its derivatives	Organic acid And Its derivatives	529-64-6	327832	92001.2	30467	6021.47	53662	35253.7	62492.8	74624.8	314521	11231.2	98239.9	41355.7	0.337409	0.888069	1.10496	0.143993	insig
MW0153879	C9H18N2O4S	Met-Thr-OH	Amino acid and Its metabolites	Small Peptide	-	444785	2.80879e+06	1.54044e+06	1.9057e+06	3.96687e+06	4.98012e+06	2.27891e+06	3.3834e+06	2.09393e+06	1.20585e+06	614284	1.85892e+06	0.336943	0.395755	0.730843	-0.452366	insig
MW0127456	C2H6OS	Dimethyl sulfoxide	Others	Others	67-68-5	118487933	1.10846e+08	1.18198e+08	1.07139e+08	1.04263e+08	1.06977e+08	1.13858e+08	1.11782e+08	1.09904e+08	1.0618e+08	1.05684e+08	1.14792e+08	0.336197	0.837945	0.994428	-0.00806066	insig
MW0164894	C27H44O4	(7R,8R,9S,10R,12S,13R,14S,17R)-7,12-dihydroxy-17-[(2R,5S)-5-hydroxy-6-methylheptan-2-yl]-10,13-dimethyl-1,2,6,7,8,9,11,12,14,15,16,17-dodecahydrocyclopenta[a]phenanthren-3-one	Aldehyde,Ketones,Esters	Ketones	-	415543	640590	132565	3.33054e+06	368724	352758	814538	917753	921122	819161	175988	541188	0.33608	0.743785	0.799461	-0.3229	insig
MW0010713	C12H22O2	(-)-Menthyl acetate	Aldehyde,Ketones,Esters	Esters	2623-23-6	627856	2.16152e+06	282522	686496	951875	1.79523e+06	1.91956e+06	916270	1.46013e+06	455571	1.06551e+06	806058	0.335482	0.958527	1.01808	0.0258459	insig
MW0012517	C22H36O4	16,16-dimethyl-PGA1	Hormones and hormone related compounds	Hormones and hormone related compounds	41692-24-4	585275	306020	5.6268e+06	2.50012e+06	6.08366e+06	1.36612e+06	5.26743e+06	1.52713e+07	1.42766e+06	1.10906e+06	65740.4	8.08368e+06	0.334248	0.372205	1.89609	0.923031	insig
MW0004434	C13H8Cl2O	4,4'-Dichlorobenzophenone	Benzene and substituted derivatives	Benzene and substituted derivatives	90-98-2	552231	358187	584657	456312	329610	302598	453248	400174	343844	527338	486528	450165	0.333821	0.821045	1.03008	0.0427495	insig
MEDP0682	C3H6O2	Hydroxyacetone	Aldehyde,Ketones,Esters	Ketones	116-09-6	300833	325187	227744	267557	263322	313136	266942	299630	176275	290893	327979	287932	0.333054	0.765035	0.971653	-0.0414867	insig
MW0156786	C20H35N7O6	Ser-His-Val-Lys	Amino acid and Its metabolites	Small Peptide	-	455760	5.92516e+06	1.20677e+06	3.31769e+06	6.59485e+06	2.96264e+06	3.84516e+06	3.08341e+06	2.54152e+06	1.58606e+06	5.35407e+06	1.41385e+06	0.332723	0.717098	0.871044	-0.199182	insig
MW0146182	C27H50N10O10	Asp-Lys-Arg-Glu-Lys	Amino acid and Its metabolites	Small Peptide	-	56826.3	60322.3	28479.8	37464.7	87456.4	633443	48189.2	47231.6	41322.3	29505.2	465906	36040.6	0.332477	0.750889	0.739159	-0.436043	insig
MW0139711	C25H24O10	Silidianin	Heterocyclic compounds	Heterocyclic compounds	-	23569.6	2834.85	36668.3	199734	63965	11881.6	33244.1	6311.02	13338.2	4151.52	84650.3	45719	0.330169	0.464279	0.55341	-0.85358	insig
MW0102970	C20H34O5	Trioxilin A3	FA	FFA	-	1.74135e+07	1.60216e+07	7.2257e+06	1.12197e+08	2.12381e+07	9.69024e+06	2.17087e+07	2.5133e+07	2.40185e+07	2.68216e+07	3.88349e+06	1.3444e+07	0.330123	0.523734	0.625778	-0.676278	insig
MW0168788	C18H22O11	Asperuloside	Others	Others	14259-45-1	44765.7	571837	330447	459364	1.8665e+06	1.01449e+06	817905	1.02521e+06	460534	418767	131811	584165	0.329788	0.644591	0.801976	-0.31837	insig
MEDP1649	C10H15NO5	3-Methoxy-L-Tyrosine	Amino acid and Its metabolites	Amino acid derivatives	200630-46-2	37888.1	209491	75897.7	88125.3	183720	304332	125417	97688.1	186738	70886.8	44726.5	168461	0.32937	0.485554	0.771486	-0.374287	insig
MEDP0385	C9H11N5O3	L-Sepiapterin	Heterocyclic compounds	Pteridines and derivatives	17094-01-8	214934	50858.6	622932	464562	154399	274487	523014	421278	280172	228150	65345.9	360656	0.328554	0.8849	1.05412	0.0760332	insig
MW0016278	C20H39NO3	C-2 Ceramide	SL	Cer	3102-57-6	3.1976e+06	272589	124081	378474	156944	214228	86779.5	422467	1.12112e+06	213535	96252.5	888438	0.327866	0.648127	0.651161	-0.618914	insig
MW0146971	C27H40O3	Calcipotriol	Alcohol and amines	Alcohols	112965-21-6	1.37411e+06	3.28851e+06	1.7826e+06	2.06969e+06	3.82322e+06	3.68425e+06	2.82181e+06	2.25081e+06	3.82362e+06	1.4992e+06	1.38455e+06	2.65077e+06	0.326901	0.651068	0.900662	-0.150942	insig
MEDP2105	C16H34O9	3,6,9,12,15,18,21-Heptaoxatricosane-21,23-diol	Benzene and substituted derivatives	Benzene and substituted derivatives	5117-19-1	93003	166181	118110	1.64151e+06	212094	218967	109837	174375	153462	1.46689e+06	83562.7	113943	0.322607	0.865557	0.858035	-0.220892	insig
MEDP1280	C15H22N6O5S	S-Adenosyl-L-Methionine	Amino acid and Its metabolites	Amino acid derivatives	17176-17-9	189142	53366.3	225154	490071	583639	224742	902069	25858.3	1.80791e+06	16761.2	26862.3	1.04399e+06	0.320306	0.317132	2.16489	1.1143	insig
MW0014856	C25H36O2S	5Z,8Z,11Z,14Z-Eicosatetraenoic acid,3-theinylmethyl ester	FA	Oxidized lipids	390824-17-6	1.41763e+06	3.3777e+06	3.14648e+06	5.47129e+06	5.83439e+06	2.51949e+06	3.27554e+06	6.13345e+06	3.93624e+06	2.34266e+06	679812	3.86602e+06	0.319907	0.807167	0.92956	-0.10538	insig
MW0150183	C24H35N7O10	Glu-Tyr-Arg-Asp	Amino acid and Its metabolites	Small Peptide	-	275212	349980	48371	266198	312309	255247	188763	199944	148104	261057	387972	299302	0.319792	0.9486	0.985287	-0.0213838	insig
MEDP0059	C7H14N2O3	L-Theanine	Amino acid and Its metabolites	Amino acids	3081-61-6	2.20528e+06	2.52962e+06	2.03936e+06	1.93849e+06	2.45178e+06	2.21328e+06	2.27915e+06	4.9953e+06	1.46932e+06	1.22741e+06	2.1136e+06	3.89017e+06	0.319755	0.507887	1.19414	0.255969	insig
MW0149796	C15H26N4O5	Gln-Pro-Val	Amino acid and Its metabolites	Small Peptide	-	558860	270699	1.01999e+06	1.23488e+06	930569	759149	871695	1.25877e+06	606408	297956	330380	882515	0.319605	0.679586	0.889733	-0.168556	insig
MW0156980	C14H27N3O5	Ser-Val-Leu	Amino acid and Its metabolites	Small Peptide	-	399542	368191	566140	554828	543189	1.10829e+06	462868	339077	958856	361763	526097	637310	0.318796	0.77454	0.928192	-0.107504	insig
MEDN1566	C18H34O4	Octadecanedioic acid	Organic acid And Its derivatives	Organic acid And Its derivatives	871-70-5	405003	860666	370039	888099	810985	567678	807335	640829	397561	240125	1.00193e+06	549700	0.318056	0.770653	0.932098	-0.101446	insig
MW0120090	C9H7NO2	4,6-Dihydroxyquinoline	Alkaloids	Quinoline alkaloids	3517-61-1	157218	246732	215829	221861	282117	243174	214020	260631	267865	170321	161570	231921	0.317984	0.694171	0.955664	-0.065424	insig
MEDN1395	C9H10O2	(R)-(-)-2-Phenylpropionic Acid	Organic acid And Its derivatives	Organic acid And Its derivatives	7782-26-5	190893	1.27495e+06	365198	551303	786648	53466.3	324385	107032	309806	535580	966165	938619	0.317965	0.9772	0.987317	-0.0184149	insig
MEDN0320	C9H10O2	Hydrocinnamic Acid	Organic acid And Its derivatives	Organic acid And Its derivatives	501-52-0	190893	1.27495e+06	365198	551303	786648	53466.3	324385	107032	309806	535580	966165	938619	0.317965	0.9772	0.987317	-0.0184149	insig
MW0142554	C18H19N6	2-Phenyl-amino-N6-endo-norbornyladenine	Heterocyclic compounds	Heterocyclic compounds	863202-33-9	7.52948e+06	2.67345e+07	1.83705e+07	1.78443e+07	2.68312e+07	2.51058e+07	1.91856e+07	2.11286e+07	2.0243e+07	1.36426e+07	1.76012e+07	1.28562e+07	0.317563	0.408208	0.854932	-0.226118	insig
MEDP2500	C7H13N3O5	Asn-Ser	Amino acid and Its metabolites	Small Peptide	-	139876	84887.5	178659	196614	200583	108696	118271	162542	234249	91404.2	87941.4	395328	0.316255	0.582671	1.19841	0.261124	insig
MW0107507	C11H20N2O3	Ile-Pro	Amino acid and Its metabolites	Small Peptide	37462-92-3	1.28918e+06	184152	1.01441e+06	935984	1.05024e+06	236094	1.09682e+06	828203	622876	1.051e+06	168052	1.0809e+06	0.314875	0.925659	1.02926	0.0416015	insig
MW0126745	C16H17ClN2O	Tetrazepam	Heterocyclic compounds	Heterocyclic compounds	10379-14-3	90344.6	382532	320279	475116	604226	1.18208e+06	636913	546512	549230	295416	161129	698903	0.312312	0.877284	0.945501	-0.0808496	insig
MEDP2164	C9H15NO3	2,2-Dihydroxymethyl-1-azabicyclo[2.2.2]octan-3-one	Heterocyclic compounds	Heterocyclic compounds	5608-24-2	8.68185e+06	4.30192e+06	3.52113e+06	9.60431e+06	5.52811e+06	6.85016e+06	4.65347e+06	8.43887e+06	5.38687e+06	3.74022e+06	7.73583e+06	1.23776e+07	0.310145	0.702412	1.09991	0.13739	insig
MW0015942	C30H48O5	Asiatic acid	Organic acid And Its derivatives	Organic acid And Its derivatives	464-92-6	200282	19130.4	214797	639076	787280	39489.9	974215	91015.7	22414	308530	11136.5	170871	0.310046	0.792543	0.830598	-0.267778	insig
MW0152344	C28H41N7O6S	Leu-Gly-His-Phe-Met	Amino acid and Its metabolites	Small Peptide	-	161803	515696	352757	202397	859373	1.6562e+06	490892	998180	690948	324424	43669.5	484545	0.309184	0.665755	0.809091	-0.305626	insig
MEDP2647	C9H8N2O2	4-(Hydroxyamino)quinoline 1-oxide	Benzene and substituted derivatives	Benzene and substituted derivatives	4637-56-3	27523.3	191992	50922.2	149865	83299.8	1.66986e+06	51802.1	496493	240914	71166.6	85798.7	618783	0.308045	0.729586	0.720029	-0.473872	insig
MEDP2569	C10H19N3O4	Asn-Leu	Amino acid and Its metabolites	Small Peptide	-	9.39633e+06	2.2382e+06	7.48218e+06	7.04652e+06	7.7367e+06	2.73777e+06	9.10907e+06	7.03096e+06	5.47197e+06	7.75427e+06	1.34308e+06	1.17438e+07	0.307944	0.615033	1.15873	0.212543	insig
MW0134897	C21H18O9	6-(3,4-dihydroxy-6-methyl-5-oxooxan-2-yl)-5,7-dihydroxy-2-(3-hydroxyphenyl)-4H-chromen-4-one	Aldehyde,Ketones,Esters	Ketones	-	421300	687261	194264	1.70304e+06	527368	189083	542427	381284	991053	116058	1.51499e+06	108764	0.307814	0.972712	0.981801	-0.0264975	insig
MW0114793	C30H52O26	Maltopentaose	Carbohydrates and Its metabolites	Sugars	-	373122	162184	109848	104712	127909	61161.3	92322.6	92383.1	351986	103656	361518	125077	0.307406	0.66537	1.20023	0.263315	insig
MW0159223	C31H52N6O7	Val-Tyr-Lys-Val-Leu	Amino acid and Its metabolites	Small Peptide	-	2.54971e+06	1.59495e+07	1.3294e+06	6.32682e+06	6.71158e+06	9.43443e+06	6.67955e+06	5.65053e+06	4.92929e+06	3.92535e+06	2.24831e+06	6.07647e+06	0.307191	0.379904	0.697601	-0.519527	insig
MEDP1077	C11H15N5O4	2'-O-methyladenosine	Nucleotide And Its metabolites	Nucleotide And Its metabolites	2140-79-6	4.14959e+06	323067	6.2353e+07	1.72414e+07	1.31077e+07	780892	2.30145e+07	3.40296e+06	856488	3.43962e+07	4.99092e+06	3.29775e+06	0.307093	0.686182	0.714188	-0.485623	insig
MW0111208	C15H14N4O	Nevirapine	Heterocyclic compounds	Heterocyclic compounds	129618-40-2	1.17699e+07	326215	328062	1.33472e+06	635120	24290.3	704590	36974.6	500359	756034	364320	1.57119e+06	0.305337	0.397559	0.272811	-1.87403	insig
MW0005981	C20H28O2	Alitretinoin	Organic acid And Its derivatives	Organic acid And Its derivatives	5300-03-8	1.26475e+06	1.47907e+06	877764	3.41485e+06	2.32956e+06	2.80407e+06	2.49019e+06	3.76158e+06	2.69137e+06	2.64063e+06	498563	1.99448e+06	0.30516	0.60453	1.15667	0.209983	insig
MW0145068	C15H20N2O	Anagyrine	Alkaloids	Alkaloids	486-89-5	59549.1	44189.2	25547.7	17489.6	35860.9	39128.8	40433.5	56919.4	39189.6	25825	33806.6	13911.9	0.304564	0.822195	0.947336	-0.0780526	insig
MW0109371	C17H28N8O4	Pro-His-Arg	Amino acid and Its metabolites	Small Peptide	-	3.73202e+06	4.40356e+06	1.49995e+06	2.17452e+07	8.15295e+06	4.30016e+06	4.11931e+06	7.00322e+06	1.00962e+07	2.91417e+06	1.47325e+06	6.3033e+06	0.303853	0.563882	0.727963	-0.458063	insig
MW0152574	C23H43N5O6	Leu-Val-Val-Val-Gly	Amino acid and Its metabolites	Small Peptide	-	482278	3446.31	58563.7	750024	717761	26388.2	560919	267925	6131.04	1.77862e+06	33625.1	67808.5	0.301394	0.729028	1.3319	0.41349	insig
MEDP1465	C4H10O2	(2S,3S)-butane-2,3-diol	Alcohol and amines	Alcohols	19132-06-0	929415	717072	330686	587289	598800	550154	549170	730433	650497	521707	740037	598864	0.300858	0.888841	1.02081	0.0297199	insig
MW0141407	C20H34O6	15(R),19(R)-hydroxy PGF2	Hormones and hormone related compounds	Hormones and hormone related compounds	-	115632	10480.2	1.14975e+06	103376	463727	22919.6	48870.2	255443	91071.6	96080.7	8065.24	190414	0.30041	0.333571	0.369767	-1.43531	insig
MEDN0820	C5H8O5	3-Hydroxyglutaric acid	Organic acid And Its derivatives	Organic acid And Its derivatives	638-18-6	506228	62051.4	392464	300434	163021	37253.9	157102	201880	138255	273586	296254	143585	0.300365	0.626039	0.828397	-0.271606	insig
[truncated: 416 more rows]
